# Supplementary material
Source: PubMed Central journal article supplement (PMC2626637)
Supplement: NIHMS86348-supplement-1_si_001.pdf [file NIHMS86348-supplement-1_si_001.pdf]

Anionic Snieckus-Fries Rearrangement:  
Solvent Effects and Role of Mixed Aggregates

Jason C. Riggs, Kanwal J. Singh, Yun Ma, and David B. Collum\*

Contribution from the Department of Chemistry and Chemical Biology

Baker Laboratory, Cornell University, Ithaca, New York, 14853-1301

Received xxx; E-Mail: [dbc6@cornell.edu](mailto:dbc6@cornell.edu)

**Supporting Information**

**Part I: NMR Spectroscopic Studies**

|                  |                                                                                                                                                                     |     |
|------------------|---------------------------------------------------------------------------------------------------------------------------------------------------------------------|-----|
| <b>Figure 1</b>  | $^{13}\text{C}$ NMR and $^1\text{H}$ NMR spectra of <b>4b</b> .                                                                                                     | S8  |
| <b>Figure 2</b>  | $^{13}\text{C}$ NMR and $^1\text{H}$ NMR spectra of <b>5b</b> .                                                                                                     | S9  |
| <b>Figure 3</b>  | $^{13}\text{C}$ NMR spectra of 0.21 M(+)-taddol and 0.10 M cyclohexanediamine in toluene- $d_8$ .                                                                   | S10 |
| <b>Figure 4</b>  | $^{13}\text{C}$ NMR spectra of 0.21 M (+)-taddol and 0.10 M TMCDA in toluene- $d_8$ .                                                                               | S11 |
| <b>Figure 5</b>  | $^{13}\text{C}$ NMR spectra of neat <i>R,R</i> -TMCDA and <i>S,S</i> -TMCDA.                                                                                        | S12 |
| <b>Figure 6</b>  | $^6\text{Li}$ and $^{15}\text{N}$ NMR spectra of 0.20 M [ $^6\text{Li},^{15}\text{N}$ ]LDA with 0.40 equiv of <b>4b</b> in 1.0 M <i>n</i> -BuOMe/pentane at -70 °C. | S13 |
| <b>Figure 7</b>  | $^6\text{Li}$ and $^{15}\text{N}$ NMR spectra of 0.20 M [ $^6\text{Li},^{15}\text{N}$ ]LDA with 0.40 equiv of <b>4b</b> in 4.0 M <i>n</i> -BuOMe/pentane at -70 °C. | S14 |
| <b>Figure 8</b>  | $^6\text{Li}$ and $^{15}\text{N}$ NMR spectra of 0.20 M [ $^6\text{Li},^{15}\text{N}$ ]LDA with 0.40 equiv of <b>4b</b> in 7.0 M <i>n</i> -BuOMe/pentane at -70 °C. | S15 |
| <b>Figure 9</b>  | $^6\text{Li}$ and $^{15}\text{N}$ NMR spectra of 0.20 M [ $^6\text{Li},^{15}\text{N}$ ]LDA with 0.20 equiv of <b>4b</b> in 7.0 M <i>n</i> -BuOMe/pentane at -70 °C. | S16 |
| <b>Figure 10</b> | $^6\text{Li}$ spectra of 0.20 M [ $^6\text{Li},^{15}\text{N}$ ]LDA with 0.40 equiv of <b>4b</b> in 4.0 M <i>n</i> -BuOMe/pentane at various temperatures.           | S17 |

|                  |                                                                                                                                                                          |     |
|------------------|--------------------------------------------------------------------------------------------------------------------------------------------------------------------------|-----|
| <b>Figure 11</b> | $^6\text{Li}$ and $^{15}\text{N}$ NMR spectra of 0.10 M [ $^6\text{Li},^{15}\text{N}$ ]LDA with 1.0 equiv of <b>4c</b> in 5.6 M <i>n</i> -BuOMe/pentane at -30 °C.       | S18 |
| <b>Figure 12</b> | $^6\text{Li}$ NMR spectra of 0.10 M [ $^6\text{Li},^{15}\text{N}$ ]LDA with 1.0 equiv of <b>4c</b> in 5.6 M <i>n</i> -BuOMe/pentane at -30 °C.                           | S19 |
| <b>Figure 13</b> | $^6\text{Li}$ and $^{15}\text{N}$ NMR spectra of 0.40 M [ $^6\text{Li},^{15}\text{N}$ ]LDA with 0.25 equiv of <b>4b</b> in 5.6 M <i>n</i> -BuOMe/pentane at -90 °C.      | S20 |
| <b>Figure 14</b> | $^6\text{Li}$ and $^{15}\text{N}$ NMR spectra of 0.40 M [ $^6\text{Li},^{15}\text{N}$ ]LDA with 0.25 equiv of <b>5b</b> in 5.6 M <i>n</i> -BuOMe/pentane at -90 °C.      | S21 |
| <b>Figure 15</b> | $^{13}\text{C}$ NMR spectra of <b>7d</b> in <i>n</i> -BuOMe, <b>7f</b> in DME, and <b>6g</b> in <i>R,R</i> -TMEDA.                                                       | S22 |
| <b>Figure 16</b> | $^6\text{Li}$ and $^{15}\text{N}$ NMR spectra of 0.25 M [ $^6\text{Li},^{15}\text{N}$ ]LDA with 0.40 equiv of <b>4e</b> in 2.0 M DME/pentane at -70 °C.                  | S23 |
| <b>Figure 17</b> | $^6\text{Li}$ and $^{15}\text{N}$ NMR spectra of 0.25 M [ $^6\text{Li},^{15}\text{N}$ ]LDA with 0.40 equiv of <b>4e</b> in 5.0 M DME/pentane at -70 °C.                  | S24 |
| <b>Figure 18</b> | $^6\text{Li}$ and $^{15}\text{N}$ NMR spectra of 0.25 M [ $^6\text{Li},^{15}\text{N}$ ]LDA with 0.40 equiv of <b>4e</b> in 8.0 M DME/pentane at -70 °C.                  | S25 |
| <b>Figure 19</b> | $^6\text{Li}$ and $^{15}\text{N}$ NMR spectra of 0.25 M [ $^6\text{Li},^{15}\text{N}$ ]LDA with 0.30 equiv of <b>4e</b> in 5.0 M DME/pentane at -70 °C.                  | S26 |
| <b>Figure 20</b> | $^6\text{Li}$ and $^{15}\text{N}$ NMR spectra of 0.25 M [ $^6\text{Li},^{15}\text{N}$ ]LDA with 0.50 equiv of <b>4e</b> in 5.0 M DME/pentane at -70 °C.                  | S27 |
| <b>Figure 21</b> | $^6\text{Li}$ NMR spectrum of 0.10 M [ $^6\text{Li},^{15}\text{N}$ ]LDA with 1.0 equiv of <b>4e</b> in 6.4 M DME/pentane at -90 °C.                                      | S28 |
| <b>Figure 22</b> | $^6\text{Li}$ and $^{15}\text{N}$ NMR spectra of 0.40 M [ $^6\text{Li},^{15}\text{N}$ ]LDA with 0.25 equiv of <b>4d</b> in 6.0 M DME/pentane at -85 °C.                  | S29 |
| <b>Figure 23</b> | $^1\text{J}(^6\text{Li},^{15}\text{N})$ -resolved NMR spectrum of 0.40 M [ $^6\text{Li},^{15}\text{N}$ ]LDA with 0.25 equiv of <b>4d</b> in 6.0 M DME/pentane at -85 °C. | S30 |
| <b>Figure 24</b> | $^6\text{Li}$ and $^{15}\text{N}$ NMR spectra of 0.40 M [ $^6\text{Li},^{15}\text{N}$ ]LDA with 0.25 equiv of <b>5c</b> in 6.0 M DME/pentane at -85 °C.                  | S31 |
| <b>Figure 25</b> | $^6\text{Li}$ NMR spectra of 0.25 M [ $^6\text{Li},^{15}\text{N}$ ]LDA with 0.40 equiv of <b>4b</b> in 1.0 M <i>R,R</i> -TMEDA/toluene/pentane at -70 °C.                | S32 |

|                  |                                                                                                                                                                              |     |
|------------------|------------------------------------------------------------------------------------------------------------------------------------------------------------------------------|-----|
| <b>Figure 26</b> | $^6\text{Li}$ NMR spectra of 0.15 M [ $^6\text{Li},^{15}\text{N}$ ]LDA with 0.60 equiv of <b>4b</b> in 1.0 M <i>trans</i> -TMCDA/toluene/pentane at -70 °C.                  | S33 |
| <b>Figure 27</b> | $^6\text{Li}$ NMR spectra of 0.15 M [ $^6\text{Li},^{15}\text{N}$ ]LDA with 1.0 equiv of <b>4b</b> in 1.0 M <i>trans</i> -TMCDA/toluene/pentane at -70 °C.                   | S34 |
| <b>Figure 28</b> | $^6\text{Li}$ NMR spectra of 0.30 M [ $^6\text{Li},^{15}\text{N}$ ]LDA with 0.30 equiv of <b>4b</b> in 1.0 M <i>trans</i> -TMCDA/toluene/pentane at -70 °C.                  | S35 |
| <b>Figure 29</b> | $^6\text{Li}$ NMR spectra of 0.15 M [ $^6\text{Li},^{15}\text{N}$ ]LDA with 0.60 equiv of <b>4b</b> in 0.10 M <i>trans</i> -TMCDA/toluene/pentane at -70 °C.                 | S36 |
| <b>Figure 30</b> | $^6\text{Li}$ NMR spectra of 0.40 M [ $^6\text{Li},^{15}\text{N}$ ]LDA with 0.25 equiv of <b>4b</b> in 1.4 M <i>R,R</i> -TMCDA/toluene/pentane at variable temperatures.     | S37 |
| <b>Figure 31</b> | $^6\text{Li}$ NMR spectra of 0.10 M [ $^6\text{Li},^{15}\text{N}$ ]LDA with 1.0 equiv of <b>5b</b> in 1.4 M <i>R,R</i> -TMCDA/toluene/pentane at -80 °C.                     | S38 |
| <b>Figure 32</b> | $^6\text{Li}$ NMR spectra of 0.10 M [ $^6\text{Li},^{15}\text{N}$ ]LDA with 0.25 equiv of <b>4c</b> in 0.10 M HMPA/10.0 M THF/pentane at -90 °C.                             | S39 |
| <b>Figure 33</b> | $^6\text{Li}$ NMR spectra of 0.10 M [ $^6\text{Li},^{15}\text{N}$ ]LDA with 0.25 equiv of <b>4c</b> in 0.40 M HMPA/10.0 M THF/pentane at -90 °C.                             | S40 |
| <b>Figure 34</b> | $^6\text{Li}$ NMR spectra of 0.40 M [ $^6\text{Li},^{15}\text{N}$ ]LDA with 0.25 equiv of <b>4b</b> in 1.0 M HMPA/8.2 M THF/pentane at -90 °C.                               | S41 |
| <b>Figure 35</b> | $^1J(^6\text{Li},^{15}\text{N})$ -resolved NMR spectrum of 0.40 M [ $^6\text{Li},^{15}\text{N}$ ]LDA with 0.25 equiv of <b>4b</b> in 1.0 M HMPA/8.2 M THF/pentane at -90 °C. | S42 |
| <b>Figure 36</b> | $(^6\text{Li},^{15}\text{N})$ -HSQC NMR spectrum of 0.40 M [ $^6\text{Li},^{15}\text{N}$ ]LDA with 0.25 equiv of <b>4b</b> in 1.0 M HMPA/8.2 M THF/pentane at -90 °C.        | S43 |
| <b>Figure 37</b> | $^6\text{Li}$ NMR spectra of 0.40 M [ $^6\text{Li},^{15}\text{N}$ ]LDA with 0.25 equiv of <b>5b</b> in 1.0 M HMPA/8.2 M THF/pentane at -90 °C.                               | S44 |
| <b>Figure 38</b> | $^6\text{Li}$ NMR spectra of 0.10 M [ $^6\text{Li},^{15}\text{N}$ ]LDA with 1.0 equiv of <b>4e</b> in 0.40 M HMPA/10.0 M THF/pentane at -90 °C.                              | S45 |
| <b>Figure 39</b> | $^6\text{Li}$ NMR spectra of 0.10 M [ $^6\text{Li},^{15}\text{N}$ ]LDA with 0.25 equiv of <b>4e</b> in 0.40 M HMPA/10.0 M THF/pentane at -90 °C.                             | S46 |
| <b>Figure 40</b> | $^6\text{Li}$ NMR spectra of 0.40 M [ $^6\text{Li},^{15}\text{N}$ ]LDA with 0.25 equiv of <b>4d</b> in 1.0 M HMPA/8.2 M THF/pentane at -90 °C.                               | S47 |

|                              |                                                                                                                                                                                                               |     |
|------------------------------|---------------------------------------------------------------------------------------------------------------------------------------------------------------------------------------------------------------|-----|
| <b>Figure 41</b>             | $^6\text{Li}$ NMR spectra of 0.40 M [ $^6\text{Li},^{15}\text{N}$ ]LDA with 0.25 equiv of <b>5c</b> in 1.0 M HMPA/8.2 M THF/pentane at $-90\text{ }^\circ\text{C}$ .                                          | S48 |
| <b>Figure 42</b>             | $^6\text{Li}$ and $^{15}\text{N}$ NMR spectra of 0.40 M [ $^6\text{Li},^{15}\text{N}$ ]LDA with 0.25 equiv of <b>4b</b> in 3.0 M $\text{Me}_2\text{NEt}$ /pentane at $-100\text{ }^\circ\text{C}$ .           | S49 |
| <b>Figure 43</b>             | $^1J(^6\text{Li},^{15}\text{N})$ -resolved NMR spectrum of 0.40 M [ $^6\text{Li},^{15}\text{N}$ ]LDA with 0.25 equiv of <b>4b</b> in 3.0 M $\text{Me}_2\text{NEt}$ /pentane at $-100\text{ }^\circ\text{C}$ . | S50 |
| <b>Figure 44</b>             | $(^6\text{Li},^{15}\text{N})$ -HSQC NMR spectrum of 0.40 M [ $^6\text{Li},^{15}\text{N}$ ]LDA with 0.25 equiv of <b>4b</b> in 3.0 M $\text{Me}_2\text{NEt}$ /pentane at $-100\text{ }^\circ\text{C}$ .        | S51 |
| <b>Figure 45</b>             | $^6\text{Li}$ and $^{15}\text{N}$ NMR spectra of 0.40 M [ $^6\text{Li},^{15}\text{N}$ ] LDA with 0.25 equiv of <b>4b</b> in 3.0 M $\text{Me}_2\text{NEt}$ /pentane at $-100\text{ }^\circ\text{C}$ .          | S52 |
| <b>Figure 46</b>             | $^1J(^6\text{Li},^{15}\text{N})$ -resolved NMR spectrum of 0.40 M [ $^6\text{Li},^{15}\text{N}$ ]LDA with 0.25 equiv of <b>4b</b> in 3.0 M $\text{Me}_2\text{NEt}$ /pentane at $-100\text{ }^\circ\text{C}$ . | S53 |
| <b>Figure 47</b>             | $^6\text{Li}$ and $^{15}\text{N}$ NMR spectra of 0.40 M [ $^6\text{Li},^{15}\text{N}$ ]LDA with 0.25 equiv of <b>5b</b> in 7.7 M $\text{Me}_2\text{NEt}$ /pentane at $-100\text{ }^\circ\text{C}$ .           | S54 |
| <b>Figure 48</b>             | $^6\text{Li}$ and $^{15}\text{N}$ NMR spectra of 0.10 M [ $^6\text{Li},^{15}\text{N}$ ]LDA with 0.50 equiv of <b>4b</b> in 7.7 M $\text{Me}_2\text{NEt}$ /pentane at $-100\text{ }^\circ\text{C}$ .           | S55 |
| <b>Table 1</b>               | Summary of NMR spectroscopic data.                                                                                                                                                                            | S56 |
| <b>Part II: Rate Studies</b> |                                                                                                                                                                                                               |     |
| <b>Figure 49</b>             | Plot of $k_{\text{obsd}}$ versus [ $n\text{-BuOMe}$ ] for the Fries rearrangement of <b>7d</b> .                                                                                                              | S57 |
| <b>Figure 50</b>             | Plot of $k_{\text{obsd}}$ versus [LDA] for the Fries rearrangement of <b>7d</b> in 7.0 M $n\text{-BuOMe}$ .                                                                                                   | S58 |
| <b>Figure 51</b>             | Plot of $k_{\text{obsd}}$ versus [LDA] for the Fries rearrangement of <b>7d</b> in 1.3 M $n\text{-BuOMe}$ .                                                                                                   | S59 |
| <b>Table 2</b>               | Fit of data from Figures 49, 50, and 51 to the non-linear Noyes equation.                                                                                                                                     | S60 |
| <b>Figure 52</b>             | Plot of $k_{\text{obsd}}$ versus [DME] for the Fries rearrangement of <b>7e</b> .                                                                                                                             | S61 |
| <b>Figure 53</b>             | Plot of $k_{\text{obsd}}$ versus [LDA] for the Fries rearrangement of <b>7e</b> in 5.0 M DME.                                                                                                                 | S62 |
| <b>Table 3</b>               | Fit of data from Figures 52 and 53 to the non-linear Noyes equation.                                                                                                                                          | S63 |

|                  |                                                                                                                             |     |
|------------------|-----------------------------------------------------------------------------------------------------------------------------|-----|
| <b>Figure 54</b> | Plot of $k_{\text{obsd}}$ versus DME mole fraction in 5.0 M DME/ <i>n</i> -BuOMe for the Fries rearrangement of <b>7e</b> . | S64 |
| <b>Figure 55</b> | Plot of $k_{\text{obsd}}$ versus [HMPA] for the Fries rearrangement of <b>6b</b> in 10.0 M THF.                             | S65 |
| <b>Figure 56</b> | Plot of $k_{\text{obsd}}$ versus [THF] for the Fries rearrangement of <b>6b</b> in 0.40 M HMPA.                             | S66 |
| <b>Figure 57</b> | Plot of $k_{\text{obsd}}$ versus [LDA] for the Fries rearrangement of <b>6b</b> in 0.40 M HMPA/10.0 M THF.                  | S67 |
| <b>Figure 58</b> | Plot of $k_{\text{obsd}}$ versus [HMPA] for the Fries rearrangement of <b>6d</b> in 10.0 M THF.                             | S68 |
| <b>Figure 59</b> | Plot of $k_{\text{obsd}}$ versus [THF] for the Fries rearrangement of <b>6d</b> in 0.40 M HMPA.                             | S69 |
| <b>Figure 60</b> | Plot of $k_{\text{obsd}}$ versus [LDA] for the Fries rearrangement of <b>6d</b> in 0.40 M HMPA/10.0 M THF.                  | S70 |
| <b>Figure 61</b> | Plot of $k_{\text{obsd}}$ versus [ <i>R,R</i> -TMCDA] for the Fries rearrangement of <b>6g</b> .                            | S71 |
| <b>Figure 62</b> | Plot of $k_{\text{obsd}}$ versus [LDA] for the Fries rearrangement of <b>6g</b> in 1.5 M <i>R,R</i> -TMCDA.                 | S72 |
| <b>Table 4</b>   | Fit of data from Figures 61 and 62 to the non-linear Noyes equation.                                                        | S73 |

### Part III: Computational Studies

|                  |                                                                                                                                       |     |
|------------------|---------------------------------------------------------------------------------------------------------------------------------------|-----|
| <b>Figure 63</b> | Relative free energies ( $\Delta G^\circ$ , kcal/mol) of mixed dimer reactant structures modeled with Me <sub>2</sub> O and X = OMe.  | S75 |
| <b>Figure 64</b> | Relative free energies ( $\Delta G^\circ$ , kcal/mol) of mixed trimer reactant structures modeled with Me <sub>2</sub> O and X = OMe. | S76 |
| <b>Figure 65</b> | Relative free energies ( $\Delta G^\circ$ , kcal/mol) of mixed trimer reactant structures modeled with Me <sub>2</sub> O and X = F.   | S77 |
| <b>Figure 66</b> | Relative free energies ( $\Delta G^\circ$ , kcal/mol) of mixed trimer reactant structures modeled with Me <sub>2</sub> O and X = H.   | S77 |
| <b>Figure 67</b> | Relative free energies ( $\Delta G^\circ$ , kcal/mol) of transition structures modeled with Me <sub>2</sub> O and X = OMe.            | S78 |

|                  |                                                                                                                             |      |
|------------------|-----------------------------------------------------------------------------------------------------------------------------|------|
| <b>Figure 68</b> | Relative free energies ( $\Delta G^\circ$ , kcal/mol) of transition structures modeled with Me <sub>2</sub> O and X = F.    | S79  |
| <b>Figure 69</b> | Relative free energies ( $\Delta G^\circ$ , kcal/mol) of transition structures modeled with Me <sub>2</sub> O and X = H.    | S80  |
| <b>Figure 70</b> | Relative free energies ( $\Delta G^\circ$ , kcal/mol) of reactant structures modeled with DME and X = F.                    | S81  |
| <b>Figure 71</b> | Relative free energies ( $\Delta G^\circ$ , kcal/mol) of transition structures modeled with DME and X = F.                  | S82  |
| <b>Figure 72</b> | Relative free energies ( $\Delta G^\circ$ , kcal/mol) of reactant structures modeled with DME and X = OMe.                  | S83  |
| <b>Figure 73</b> | Relative free energies ( $\Delta G^\circ$ , kcal/mol) of transition structures modeled with DME and X = OMe.                | S83  |
| <b>Figure 74</b> | Relative free energies ( $\Delta G^\circ$ , kcal/mol) of reactant structures modeled with DME and X = H.                    | S84  |
| <b>Figure 75</b> | Relative free energies ( $\Delta G^\circ$ , kcal/mol) of transition structures modeled with DME and X = H.                  | S84  |
| <b>Figure 76</b> | Relative free energies ( $\Delta G^\circ$ , kcal/mol) of reactant and transition structures modeled with TMEDA and X = OMe. | S85  |
| <b>Figure 77</b> | Relative free energies ( $\Delta G^\circ$ , kcal/mol) of reactant and transition structures modeled with TMEDA and X = F.   | S86  |
| <b>Figure 78</b> | Relative free energies ( $\Delta G^\circ$ , kcal/mol) of reactant and transition structures modeled with TMEDA and X = H.   | S86  |
| <b>Table 5</b>   | Cartesian coordinates and free energies ( $G^\circ$ , Hartrees) of DFT optimized geometries.                                | S87  |
| <b>Figure 79</b> | X-ray crystal structure of <b>5b</b> .                                                                                      | S158 |
|                  | <b>References</b>                                                                                                           | S164 |

### Chart 1

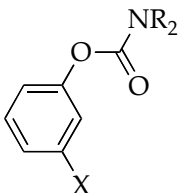

- 4a;** R= Me, X = OMe  
**4b;** R = Et, X = OMe  
**4c;** R = *i*-Pr, X = OMe  
**4d;** R = Me, X = F  
**4e;** R = *i*-Pr, X = F

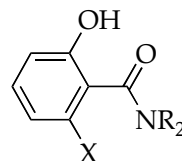

- 5a;** R = Me, X = OMe  
**5b;** R = Et, X = OMe  
**5c;** R = Me, X = F

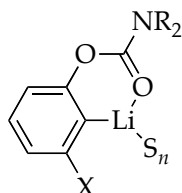

- 6a;** S = THF, R = *i*-Pr, X = F  
**6b;** S = HMPA, R = Et, X = OMe  
**6c;** S = HMPA, R = *i*-Pr, X = OMe  
**6d;** S = HMPA, R = Me, X = F  
**6e;** S = HMPA, R = *i*-Pr, X = F  
**6f;** S = DME, R = *i*-Pr, X = F  
**6g;** S =  $\eta^2$ -TMEDA, R = Et, X = OMe

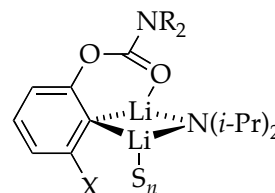

- 7a;** S = THF, R = Me, X = F  
**7b;** S = THF, R = *i*-Pr, X = F  
**7c;** S = *n*-BuOMe, R = Me, X = F  
**7d;** S = *n*-BuOMe, R = Et, X = OMe  
**7e;** S = DME, R = Me, X = F  
**7f;** S = DME, R = *i*-Pr, X = F  
**7g;** S =  $\eta^1$ -TMEDA, R = *i*-Pr, X = OMe  
**7h;** S = Me<sub>2</sub>NEt, R = Et, X = OMe

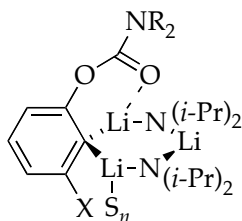

- 8a;** S =  $\eta^1$ -TMEDA, R = *i*-Pr, X = OMe  
**8b;** S = Me<sub>2</sub>NEt, R = Et, X = OMe

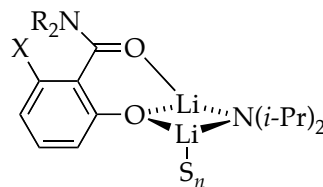

- 9a;** S = THF, R = Me, X = F  
**9b;** S = *n*-BuOMe, R = Et, X = OMe  
**9c;** S = HMPA, R = Et, X = OMe  
**9d;** S = HMPA, R = Me, X = F

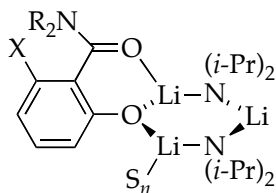

- 10a;** S = *n*-BuOMe, R = Et, X = OMe  
**10b;** S = HMPA, R = Et, X = OMe  
**10c;** S = DME, R = Me, X = F  
**10d;** S =  $\eta^1$ -TMEDA, R = Me, X = OMe  
**10e;** S = Me<sub>2</sub>NEt, R = Et, X = OMe

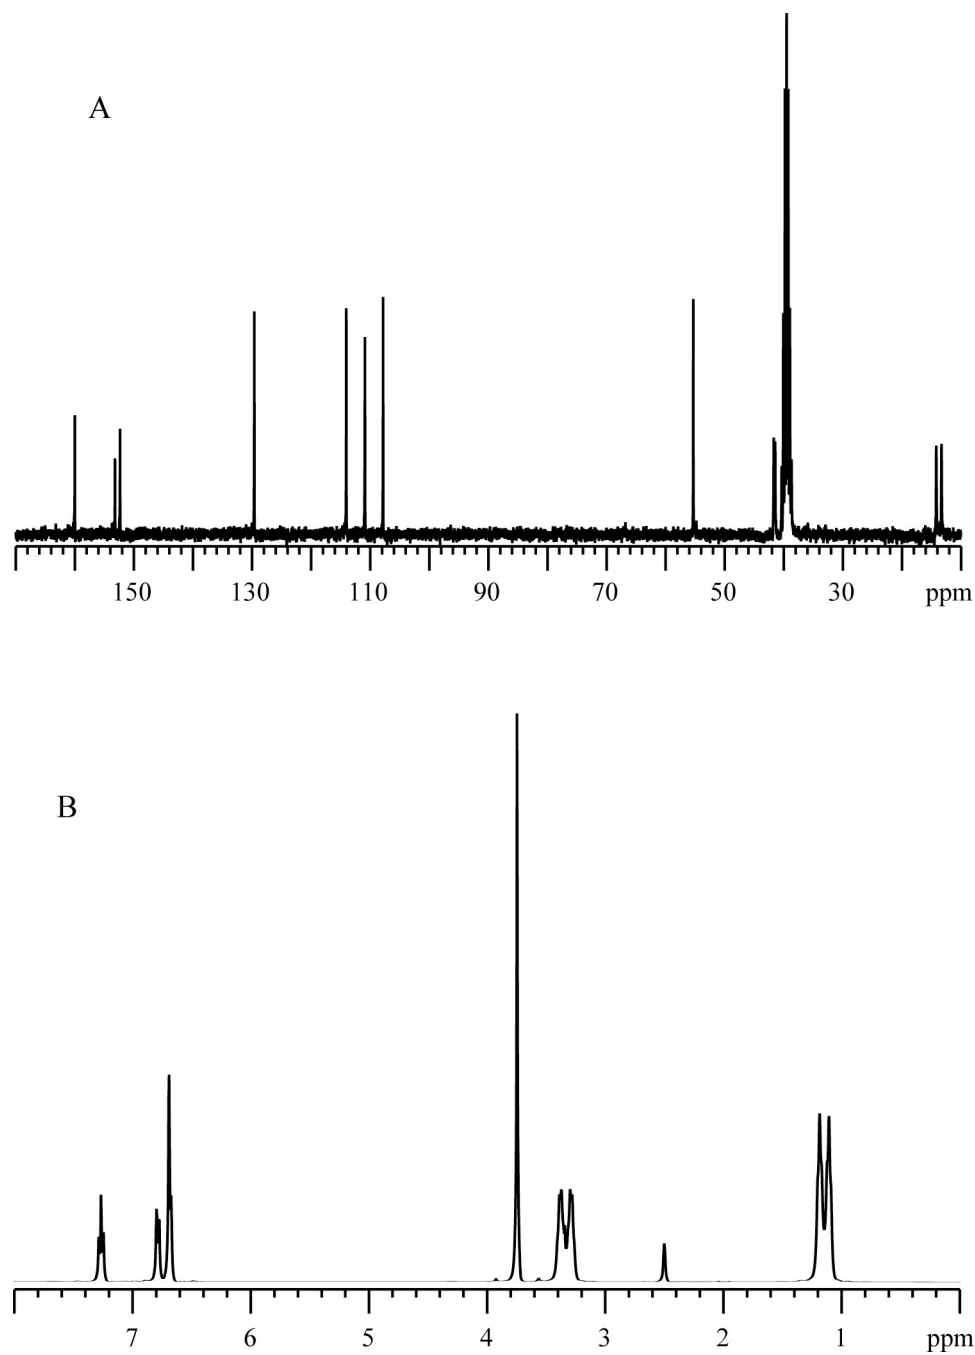

**Figure 1.** <sup>13</sup>C NMR and <sup>1</sup>H NMR spectra of **4b**. (A) <sup>13</sup>C NMR spectrum, 75 MHz, DMSO-*d*<sub>6</sub>: δ 160.0, 153.2, 152.3, 129.6, 114.0, 110.9, 107.8, 55.3, 41.7, 41.5, 14.2, 13.3; (B) <sup>1</sup>H NMR spectrum, 400 MHz, DMSO-*d*<sub>6</sub>: δ 7.28 (t, *J* = 7.7 Hz, 1H), 6.78 (d, *J* = 8.5 Hz, 1H), 6.69 (s, 1H), 6.68 (d, *J* = 7.1 Hz, 1H), 3.75 (s, 3H), 3.4-3.2 (m, 4H), 1.21 (t, *J* = 7.3 Hz, 3H), 1.11 (t, *J* = 6.7 Hz, 3H).



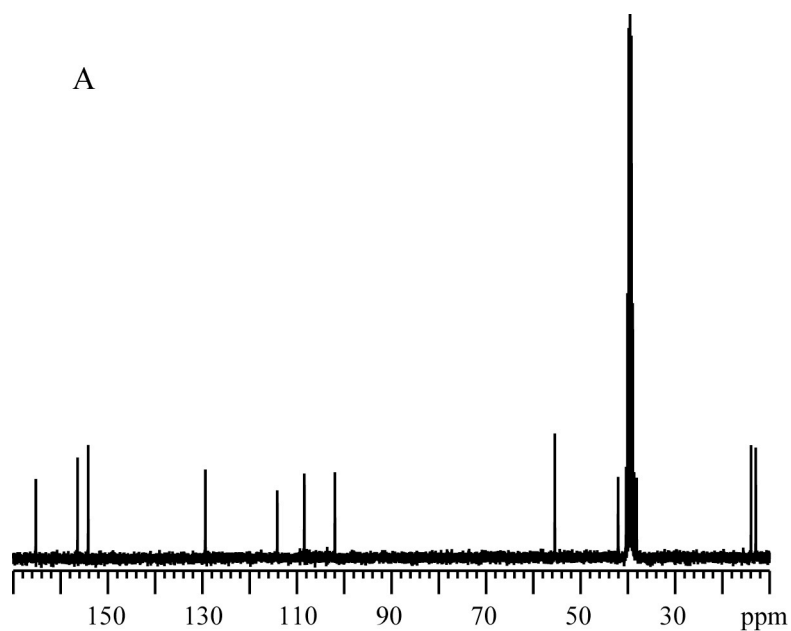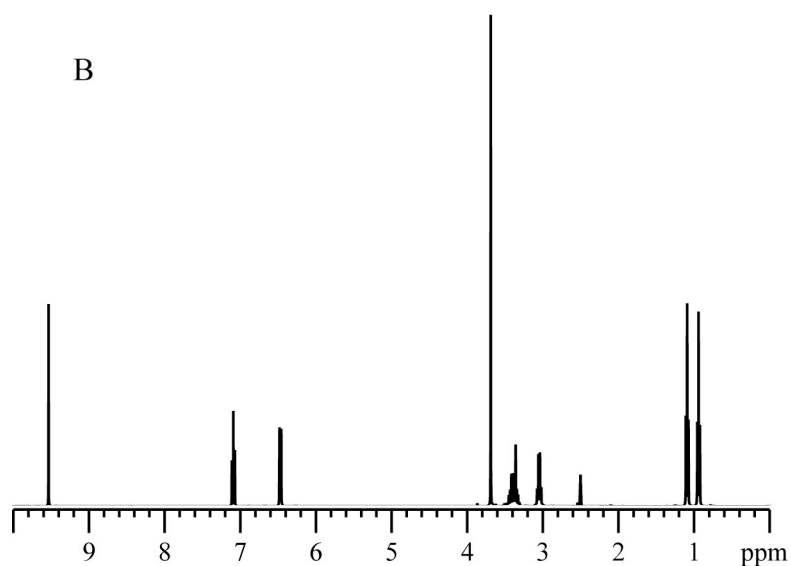

**Figure 2.**  $^{13}\text{C}$  NMR and  $^1\text{H}$  NMR spectra of **5b**. (A)  $^{13}\text{C}$  NMR spectrum, 75 MHz,  $\text{DMSO-}d_6$ :  $\delta$  165.2, 156.4, 154.2, 129.4, 114.2, 108.4, 102.0, 55.4, 42.1, 38.1, 13.9, 12.9; (B)  $^1\text{H}$  NMR spectrum, 400 MHz,  $\text{DMSO-}d_6$ :  $\delta$  9.53 (s, 1H), 7.09 (t,  $J = 8.2$  Hz, 1H), 6.48 (d,  $J = 8.3$  Hz, 1H), 6.47 (d,  $J = 8.1$  Hz, 1H), 3.69 (s, 3H), 3.38 (10-m, 2H), 3.05 (q,  $J = 6.5$  Hz, 2H), 1.09 (t,  $J = 6.8$  Hz, 3H), 0.94 (t,  $J = 6.3$  Hz, 3H).

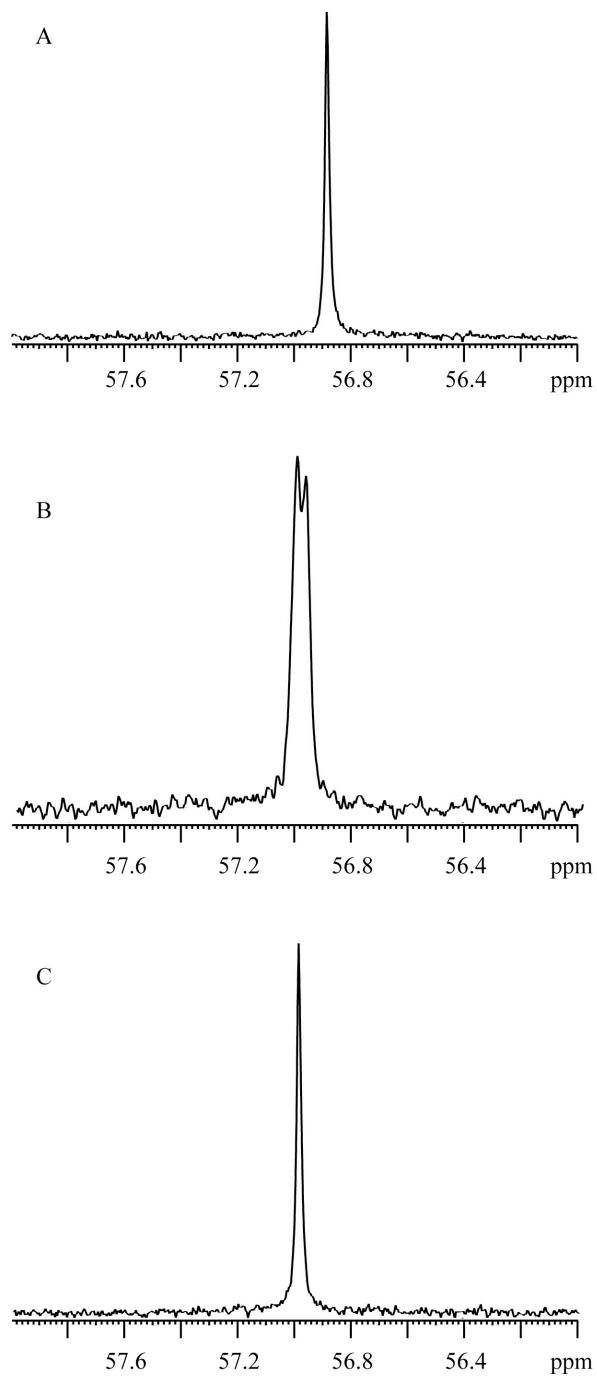

**Figure 3.**  $^{13}\text{C}$  NMR spectra at 75 MHz of 0.21 M (+)-taddol in toluene- $d_8$  and (A) 0.10 M *R,R*-1,2-cyclohexanediamine; (B) 0.05 M *R,R*-1,2-cyclohexanediamine and 0.05 M *S,S*-1,2-cyclohexanediamine; (C) 0.10 M *S,S*-1,2-cyclohexanediamine.

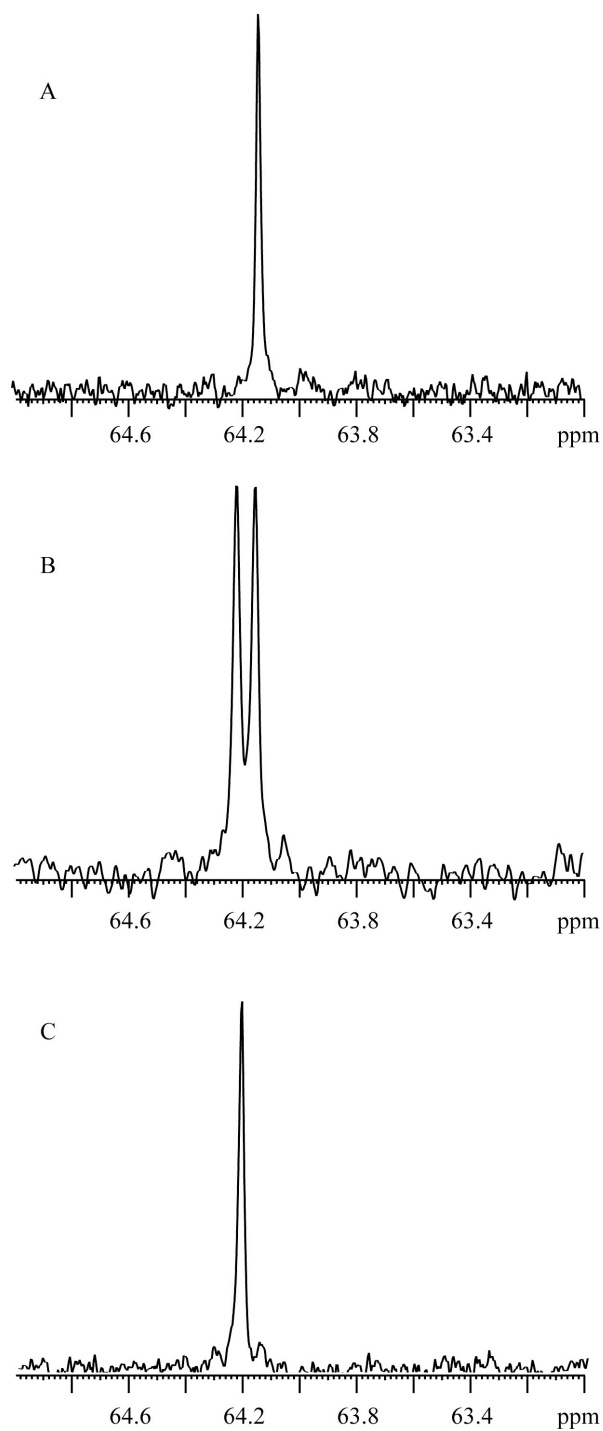

**Figure 4.**  $^{13}\text{C}$  NMR spectra at 75 MHz of 0.21 M (+)-taddol in toluene- $d_8$  and (A) 0.10 M *R,R*-TMCDA; (B) 0.05 M *R,R*-TMCDA and 0.05 M *S,S*-TMCDA; (C) 0.10 M *S,S*-TMCDA.

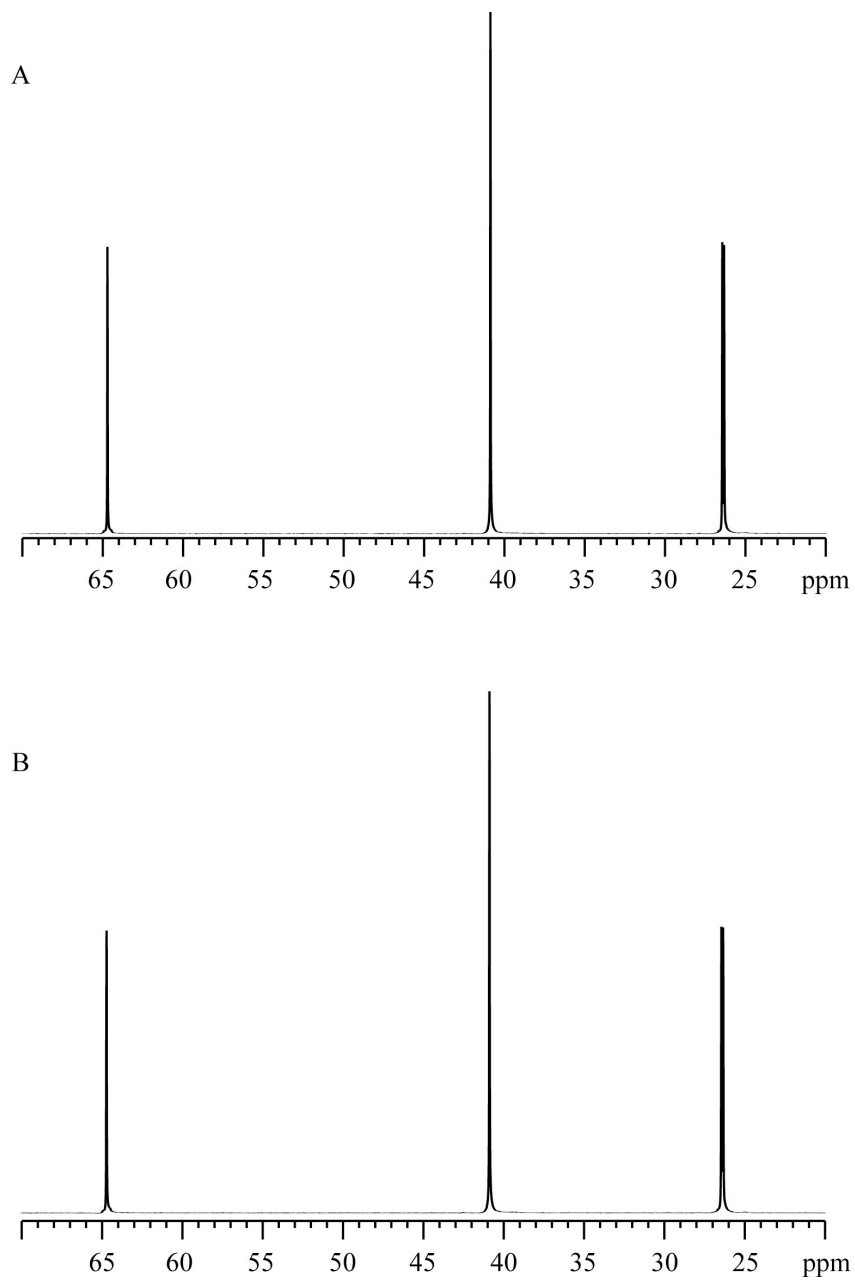

**Figure 5.**  $^{13}\text{C}$  NMR spectra at 75 MHz of (A) neat *R,R*-TMCDA; (B) neat *S,S*-TMCDA.

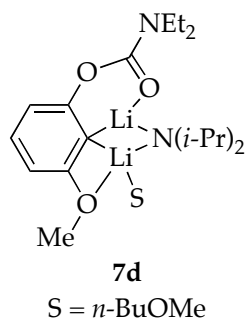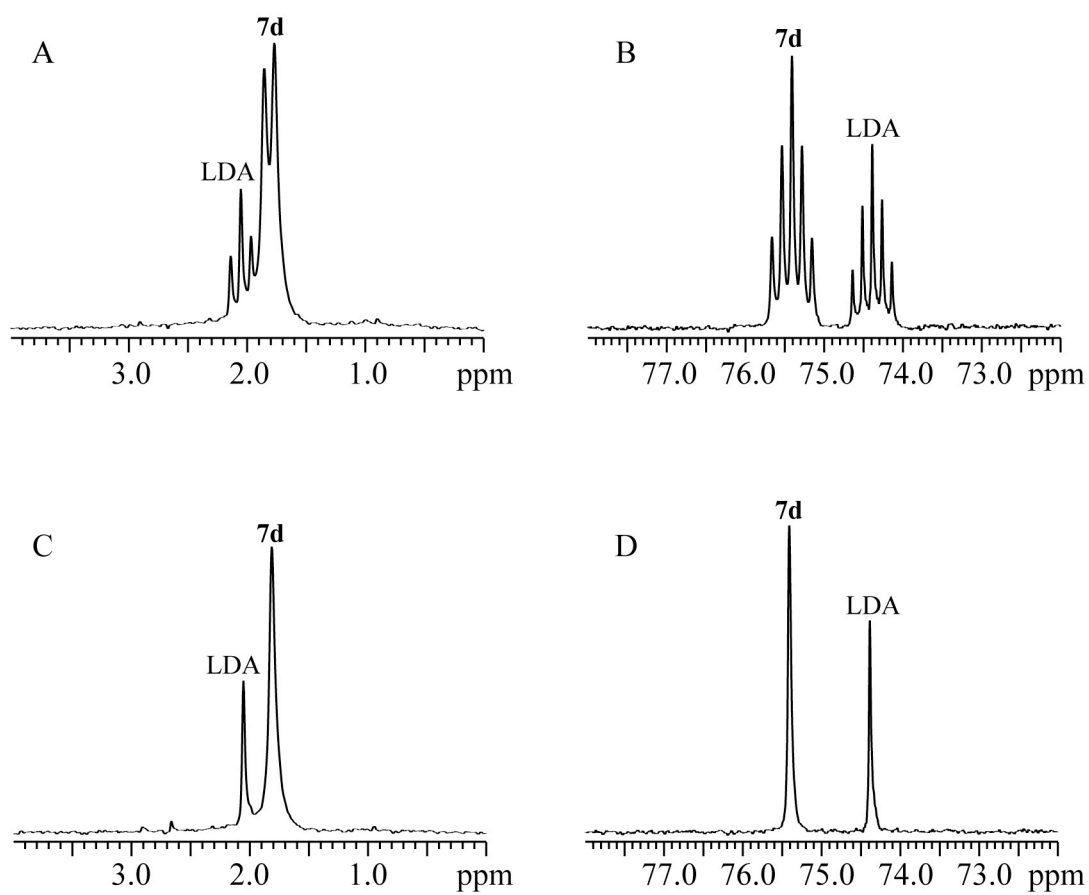

**Figure 6.**  ${}^6\text{Li}$  and  ${}^{15}\text{N}$  NMR spectra of 0.20 M  $[{}^6\text{Li}, {}^{15}\text{N}]$ LDA with 0.40 equiv **4b** in 1.0 M *n*-BuOMe/pentane at  $-70\text{ }^\circ\text{C}$ : (A)  ${}^6\text{Li}$  spectrum; (B)  ${}^{15}\text{N}$  spectrum; (C)  ${}^6\text{Li}\{{}^{15}\text{N}\}$  spectrum; (D)  ${}^{15}\text{N}\{{}^6\text{Li}\}$  spectrum.

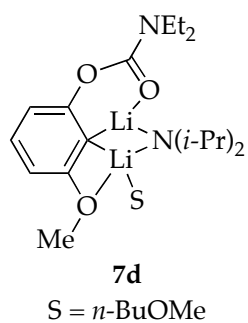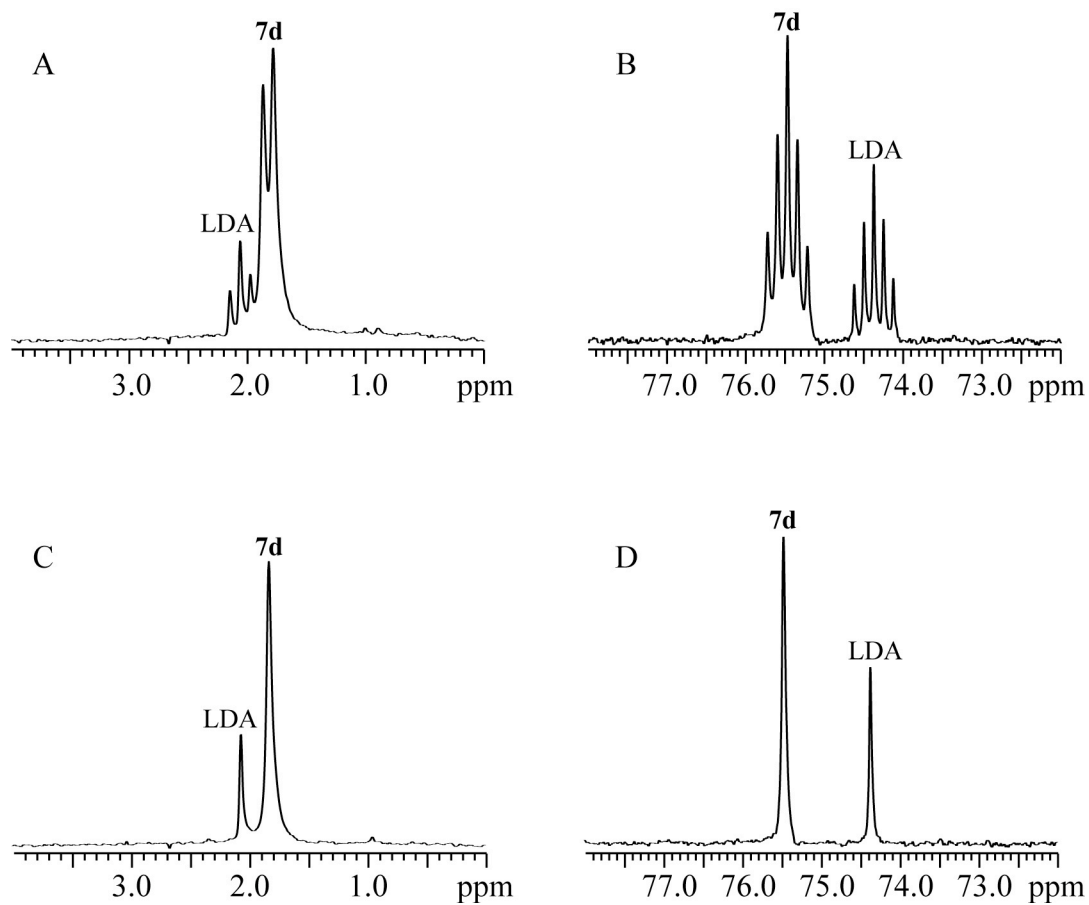

**Figure 7.**  ${}^6\text{Li}$  and  ${}^{15}\text{N}$  NMR spectra of 0.20 M  $[{}^6\text{Li}, {}^{15}\text{N}]$ LDA with 0.40 equiv **4b** in 4.0 M *n*-BuOMe/pentane at  $-70\text{ }^\circ\text{C}$ : (A)  ${}^6\text{Li}$  spectrum; (B)  ${}^{15}\text{N}$  spectrum; (C)  ${}^6\text{Li}\{^{15}\text{N}\}$  spectrum; (D)  ${}^{15}\text{N}\{^6\text{Li}\}$  spectrum.

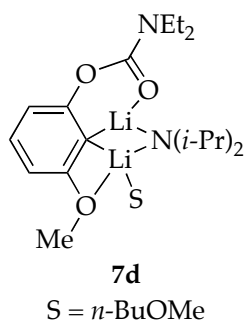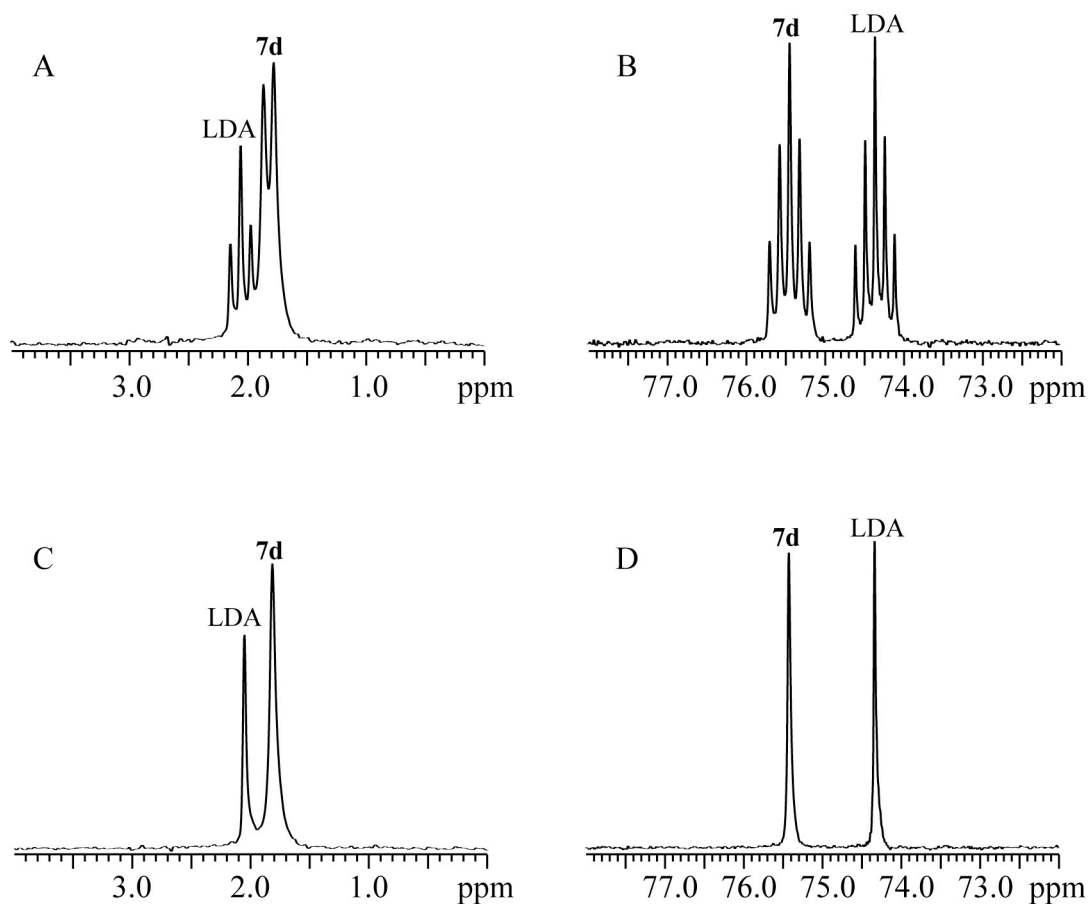

**Figure 8.**  $^6\text{Li}$  and  $^{15}\text{N}$  NMR spectra of 0.20 M [ $^6\text{Li}$ ,  $^{15}\text{N}$ ]LDA with 0.40 equiv **4b** in 7.0 M *n*-BuOMe/pentane at  $-70\text{ }^\circ\text{C}$ : (A)  $^6\text{Li}$  spectrum; (B)  $^{15}\text{N}$  spectrum; (C)  $^6\text{Li}\{^{15}\text{N}\}$  spectrum; (D)  $^{15}\text{N}\{^6\text{Li}\}$  spectrum.

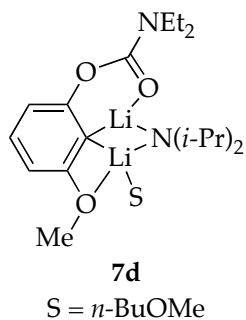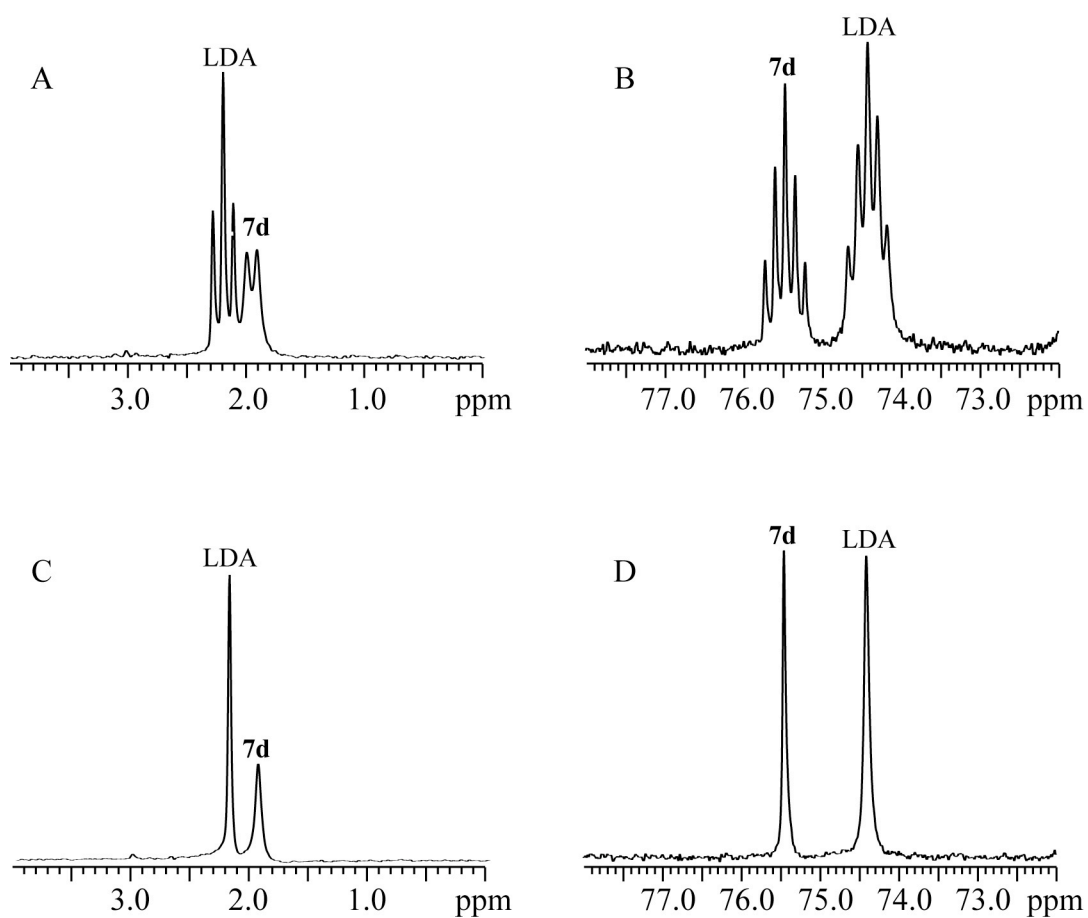

**Figure 9.**  $^6\text{Li}$  and  $^{15}\text{N}$  NMR spectra of 0.20 M [ $^6\text{Li}$ ,  $^{15}\text{N}$ ]LDA with 0.20 equiv **4b** in 7.0 M *n*-BuOMe/pentane at -70 °C: (A)  $^6\text{Li}$  spectrum; (B)  $^{15}\text{N}$  spectrum; (C)  $^6\text{Li}\{^{15}\text{N}\}$  spectrum; (D)  $^{15}\text{N}\{^6\text{Li}\}$  spectrum.



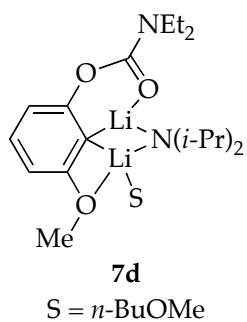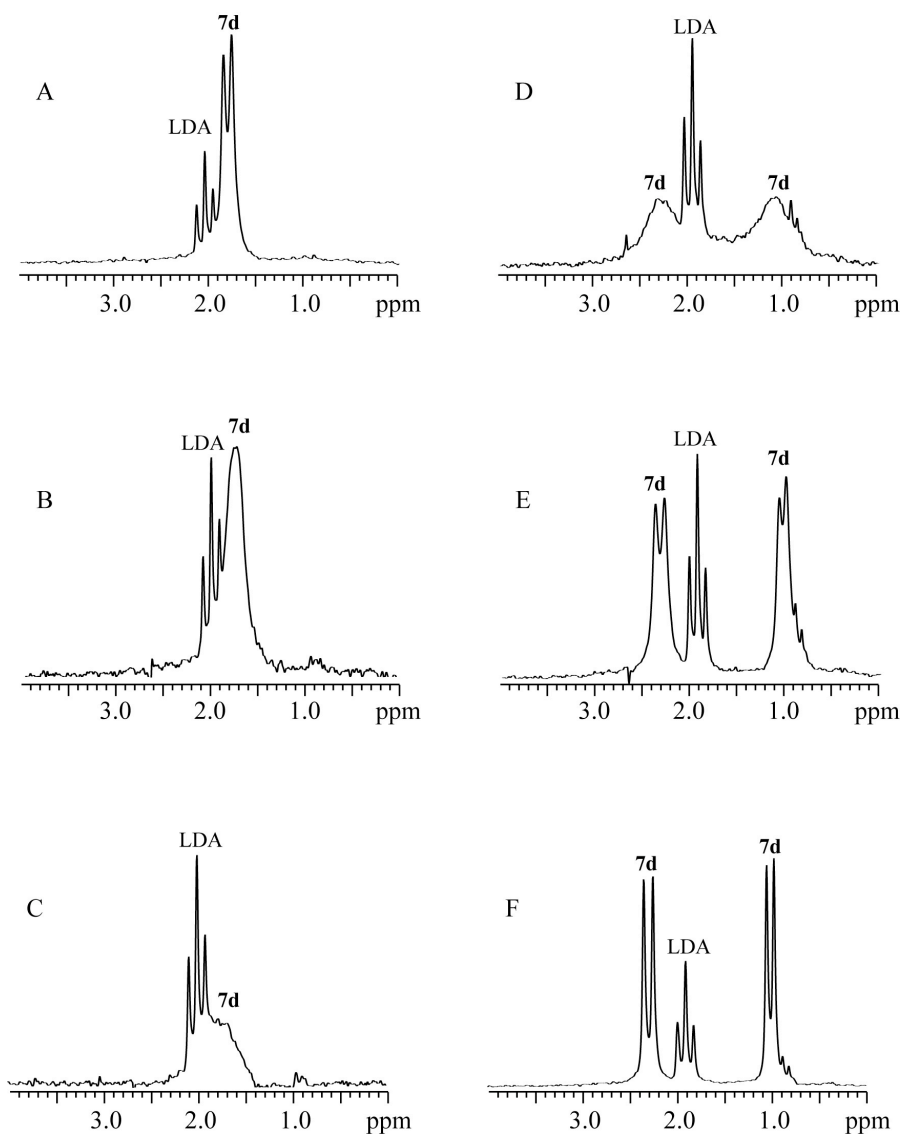

**Figure 10.**  ${}^6\text{Li}$  NMR spectra of 0.20 M [ ${}^6\text{Li}$ ,  ${}^{15}\text{N}$ ]LDA with 0.40 equiv **4b** in 4.0 M *n*-BuOMe/pentane at various temperatures: (A) -70 °C; (B) -80 °C; (C) -90 °C; (D) -100 °C; (E) -110 °C; (F) -120 °C.

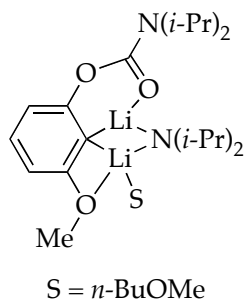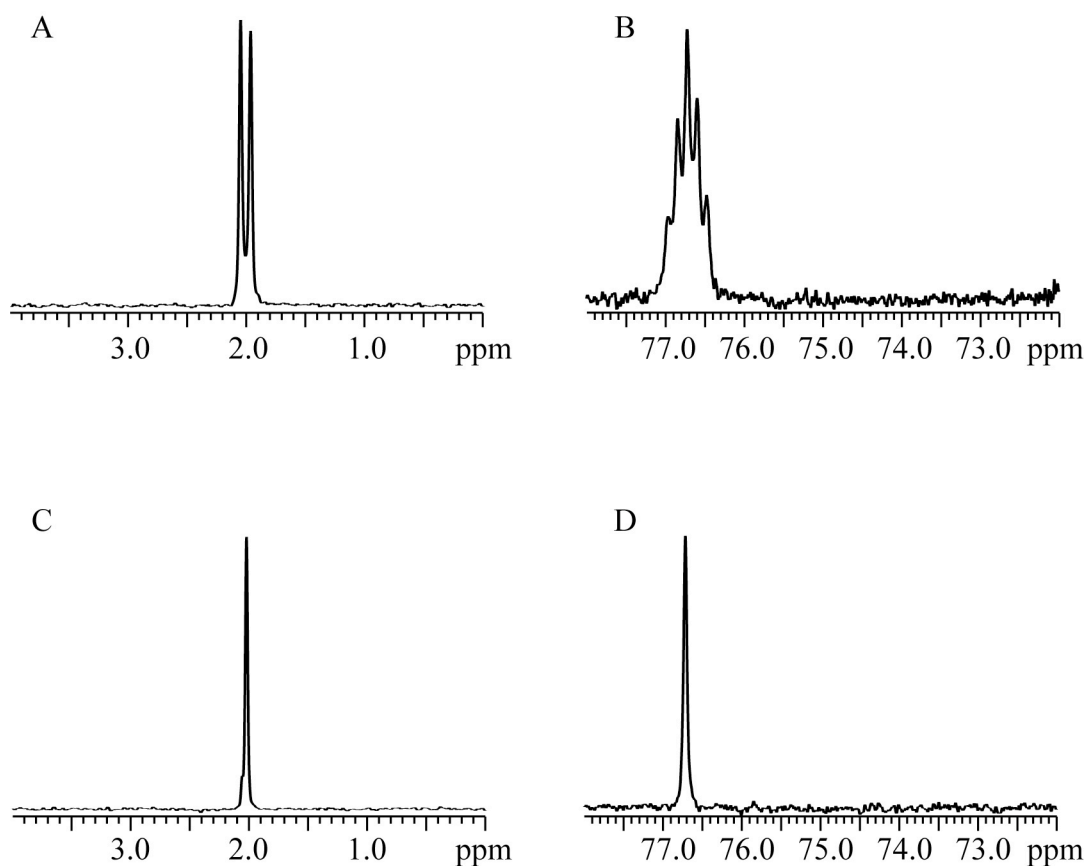

**Figure 11.**  $^6\text{Li}$  and  $^{15}\text{N}$  NMR spectra of 0.10 M [ $^6\text{Li}$ ,  $^{15}\text{N}$ ]LDA with 1.0 equiv **4c** in 5.6 M *n*-BuOMe/pentane at  $-30\text{ }^\circ\text{C}$ : (A)  $^6\text{Li}$  spectrum; (B)  $^{15}\text{N}$  spectrum; (C)  $^6\text{Li}\{^{15}\text{N}\}$  spectrum; (D)  $^{15}\text{N}\{^6\text{Li}\}$  spectrum.

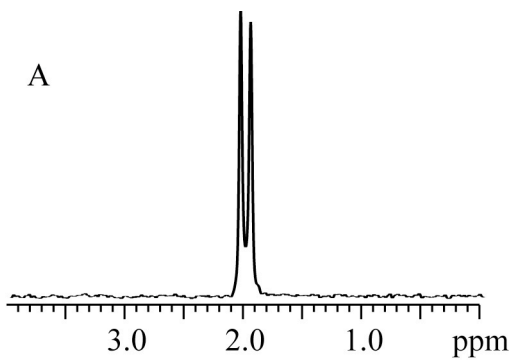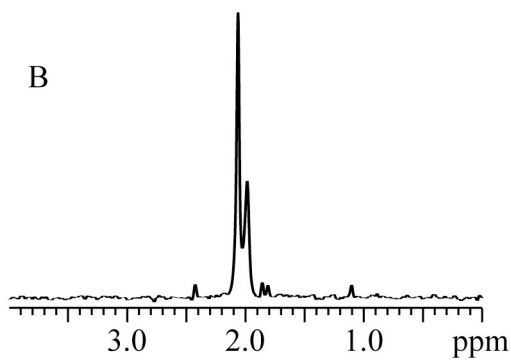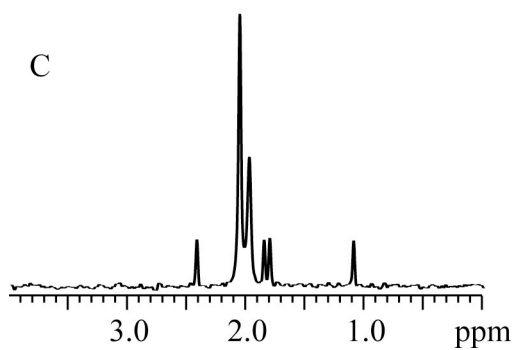

**Figure 12.**  $^6\text{Li}$  spectra of 0.10 M [ $^6\text{Li},^{15}\text{N}$ ]LDA and with 1.0 equiv **4c** in 5.6 M *n*-BuOMe/pentane (A) at  $-30\text{ }^\circ\text{C}$ ; (B) at  $-30\text{ }^\circ\text{C}$  after 1 minute of aging at  $-10\text{ }^\circ\text{C}$ ; (C) at  $-30\text{ }^\circ\text{C}$  after 15 minutes of aging at  $-10\text{ }^\circ\text{C}$ .

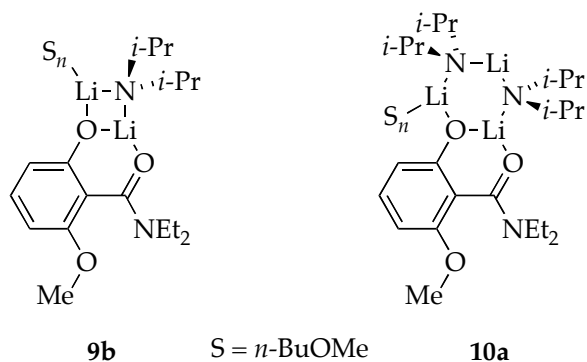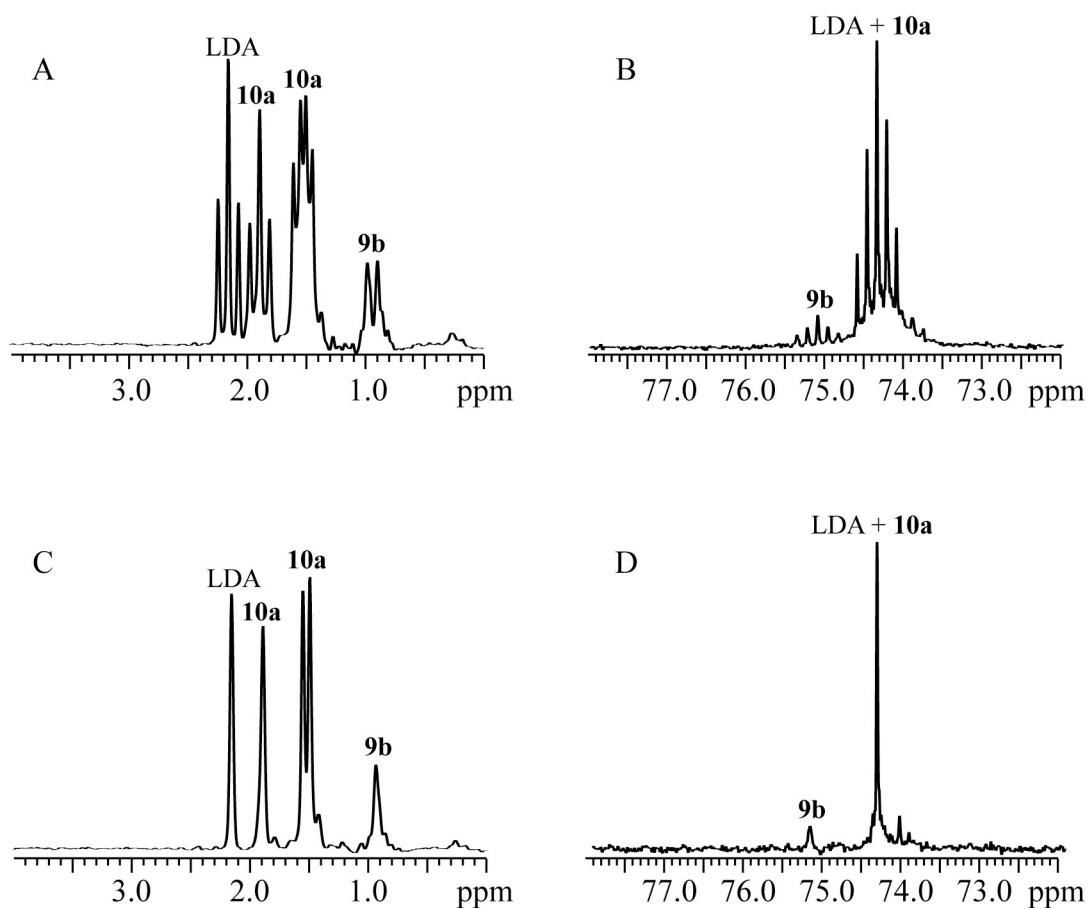

**Figure 13.**  $^6\text{Li}$  and  $^{15}\text{N}$  NMR spectra of 0.40 M [ $^6\text{Li}$ ,  $^{15}\text{N}$ ]LDA with 0.25 equiv **4b** in 5.6 M *n*-BuOMe/pentane at  $-90^\circ\text{C}$  after aging at  $0^\circ\text{C}$  for 2 hr: (A)  $^6\text{Li}$  spectrum; (B)  $^{15}\text{N}$  spectrum; (C)  $^6\text{Li}\{^{15}\text{N}\}$  spectrum; (D)  $^{15}\text{N}\{^6\text{Li}\}$  spectrum.

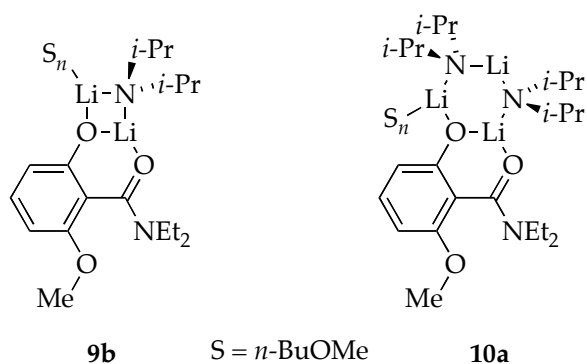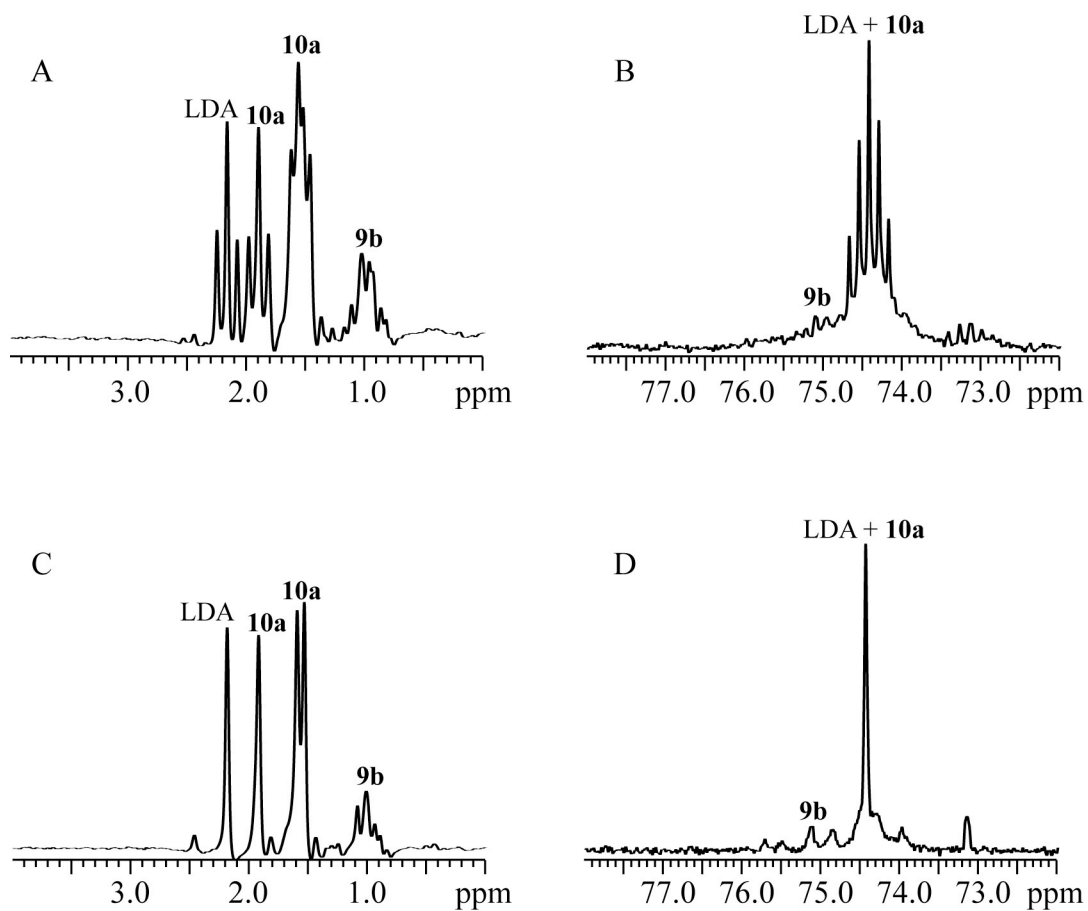

**Figure 14.**  ${}^6\text{Li}$  and  ${}^{15}\text{N}$  NMR spectra of 0.40 M [ ${}^6\text{Li}, {}^{15}\text{N}$ ]LDA with 0.25 equiv **5b** in 5.6 M *n*-BuOMe/pentane at  $-90\text{ }^\circ\text{C}$ : (A)  ${}^6\text{Li}$  spectrum; (B)  ${}^{15}\text{N}$  spectrum; (C)  ${}^6\text{Li}\{{}^{15}\text{N}\}$  spectrum; (D)  ${}^{15}\text{N}\{{}^6\text{Li}\}$  spectrum.

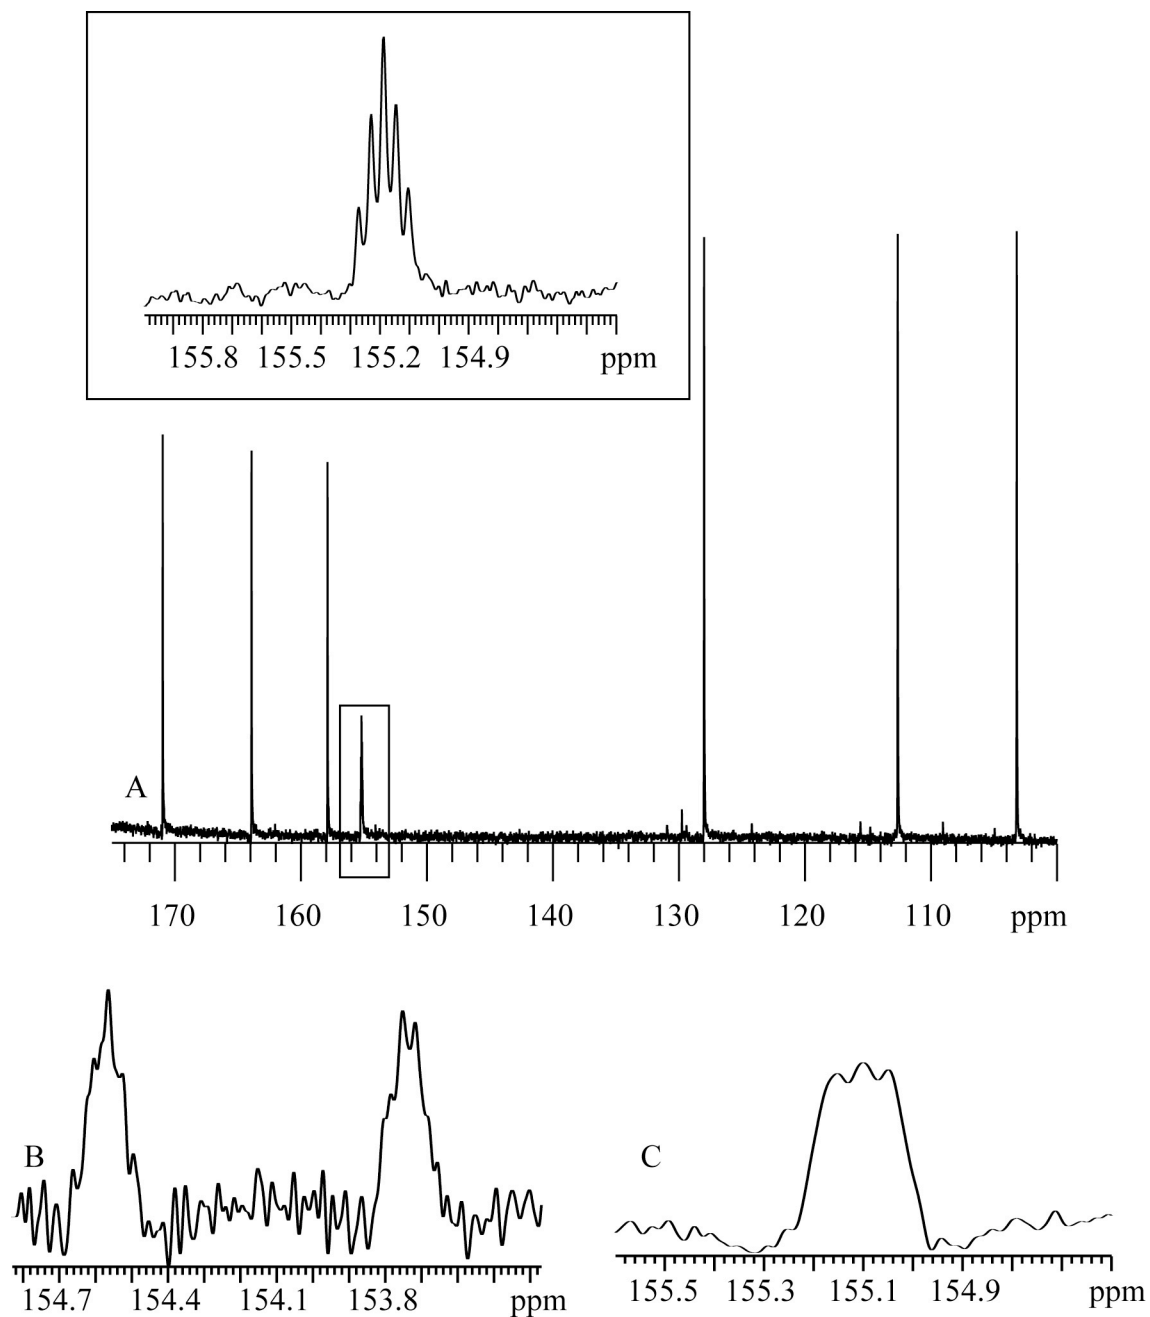

**Figure 15.**  $^{13}\text{C}$  NMR spectra of: (A) 0.35 M  $[^6\text{Li}]$ LDA and with 0.30 equiv **4b** in 5.6 M *n*-BuOMe/pentane at  $-70\text{ }^\circ\text{C}$ . Inset shows  $^1J_{\text{CLi}} = 5.7\text{ Hz}$ ; (B) 0.80 M  $[^6\text{Li},^{15}\text{N}]$ LDA and with 0.30 equiv **4e** in 2.0 M DME/pentane/toluene- $d_8$  at  $-90\text{ }^\circ\text{C}$ .  $^2J_{\text{CF}} = 123.1\text{ Hz}$ ,  $^1J_{\text{CLi}} = 5.9\text{ Hz}$ ; (C) 0.80 M  $[^6\text{Li},^{15}\text{N}]$ LDA and with 0.30 equiv **4b** in 0.5 M *R,R*-TMCDA/toluene- $d_8$  at  $-80\text{ }^\circ\text{C}$ .  $^1J_{\text{CLi}} = 7.7\text{ Hz}$ .

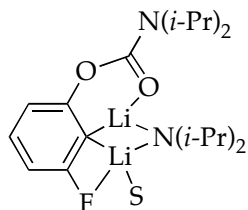

**7f**  
S = DME

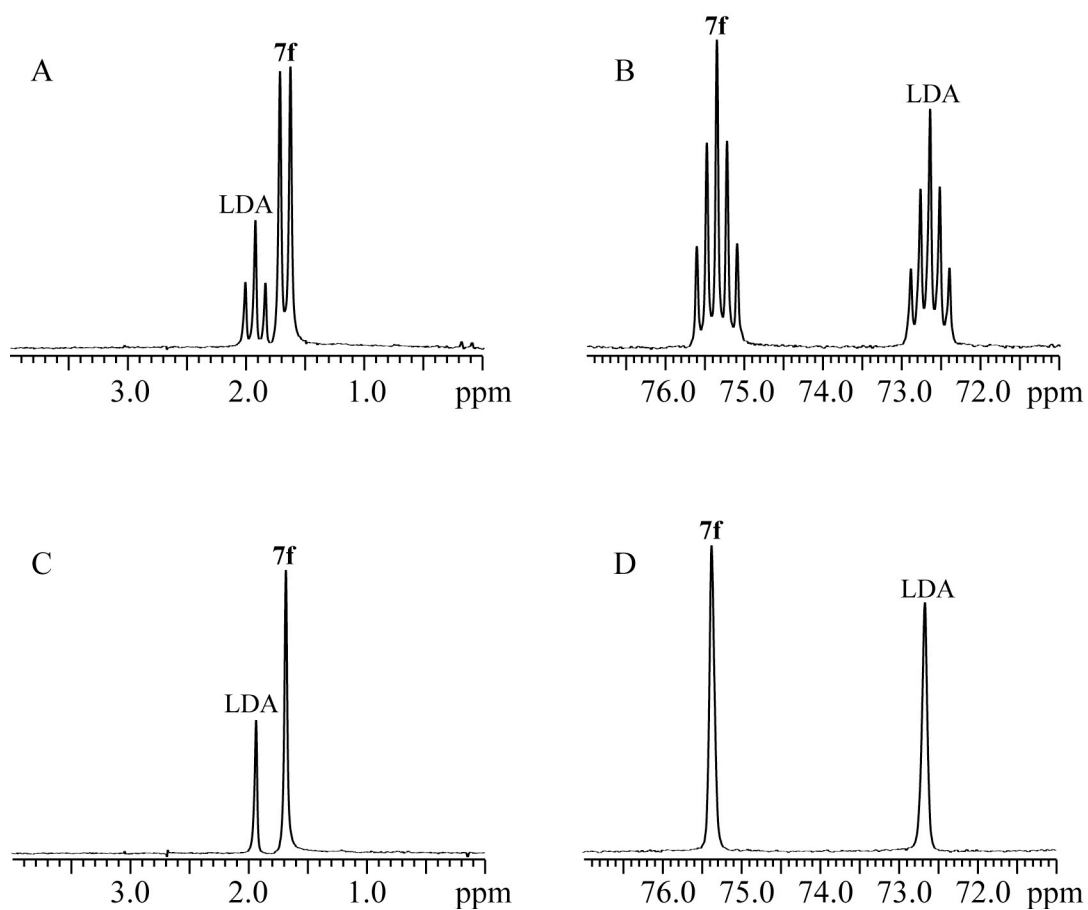

**Figure 16.**  ${}^6\text{Li}$  and  ${}^{15}\text{N}$  NMR spectra of 0.25 M [ ${}^6\text{Li}, {}^{15}\text{N}$ ]LDA with 0.40 equiv **4e** in 2.0 M DME/pentane at  $-70\text{ }^\circ\text{C}$ : (A)  ${}^6\text{Li}$  spectrum; (B)  ${}^{15}\text{N}$  spectrum; (C)  ${}^6\text{Li}\{{}^{15}\text{N}\}$  spectrum; (D)  ${}^{15}\text{N}\{{}^6\text{Li}\}$  spectrum.

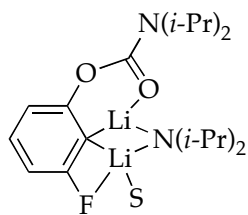

**7f**  
S = DME

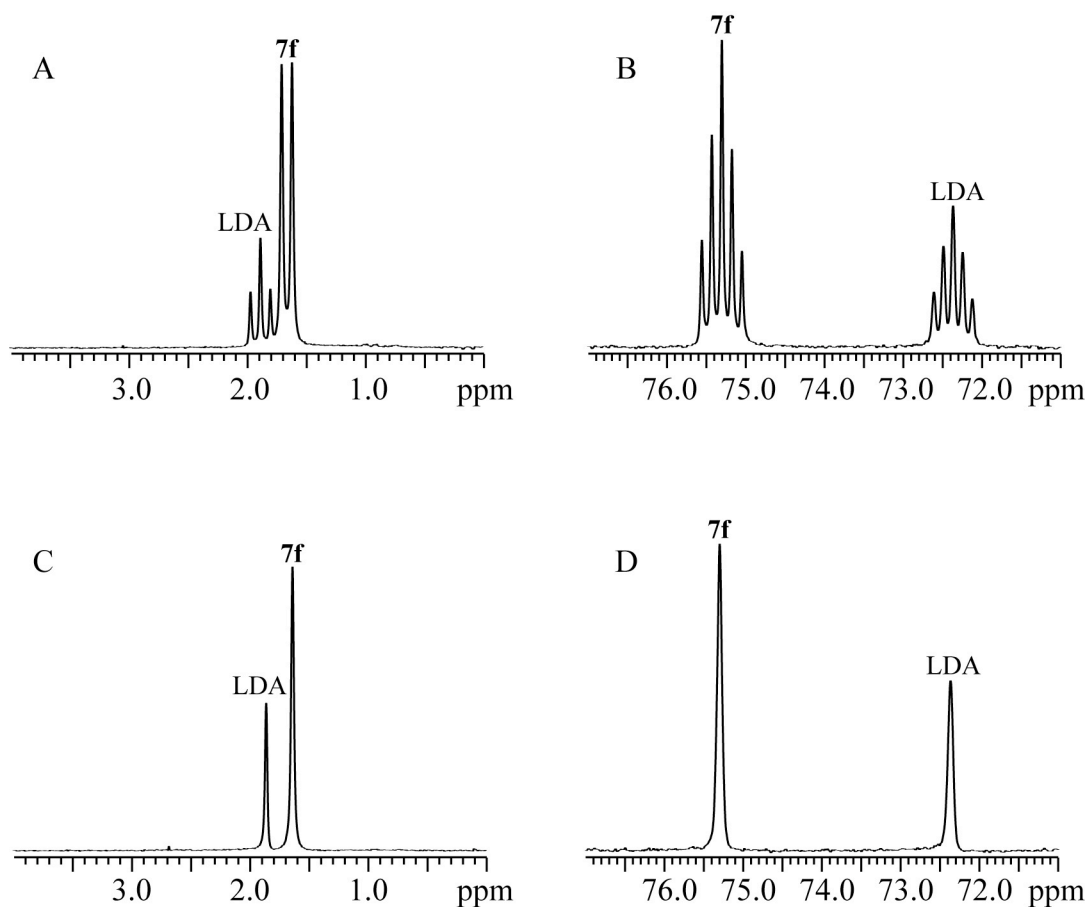

**Figure 17.**  ${}^6\text{Li}$  and  ${}^{15}\text{N}$  NMR spectra of 0.25 M [ ${}^6\text{Li}$ ,  ${}^{15}\text{N}$ ]LDA with 0.40 equiv **4e** in 5.0 M DME/pentane at  $-70\text{ }^\circ\text{C}$ : (A)  ${}^6\text{Li}$  spectrum; (B)  ${}^{15}\text{N}$  spectrum; (C)  ${}^6\text{Li}\{{}^{15}\text{N}\}$  spectrum; (D)  ${}^{15}\text{N}\{{}^6\text{Li}\}$  spectrum.



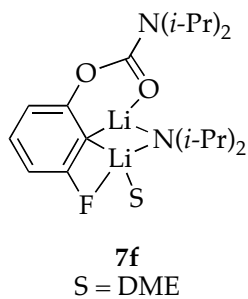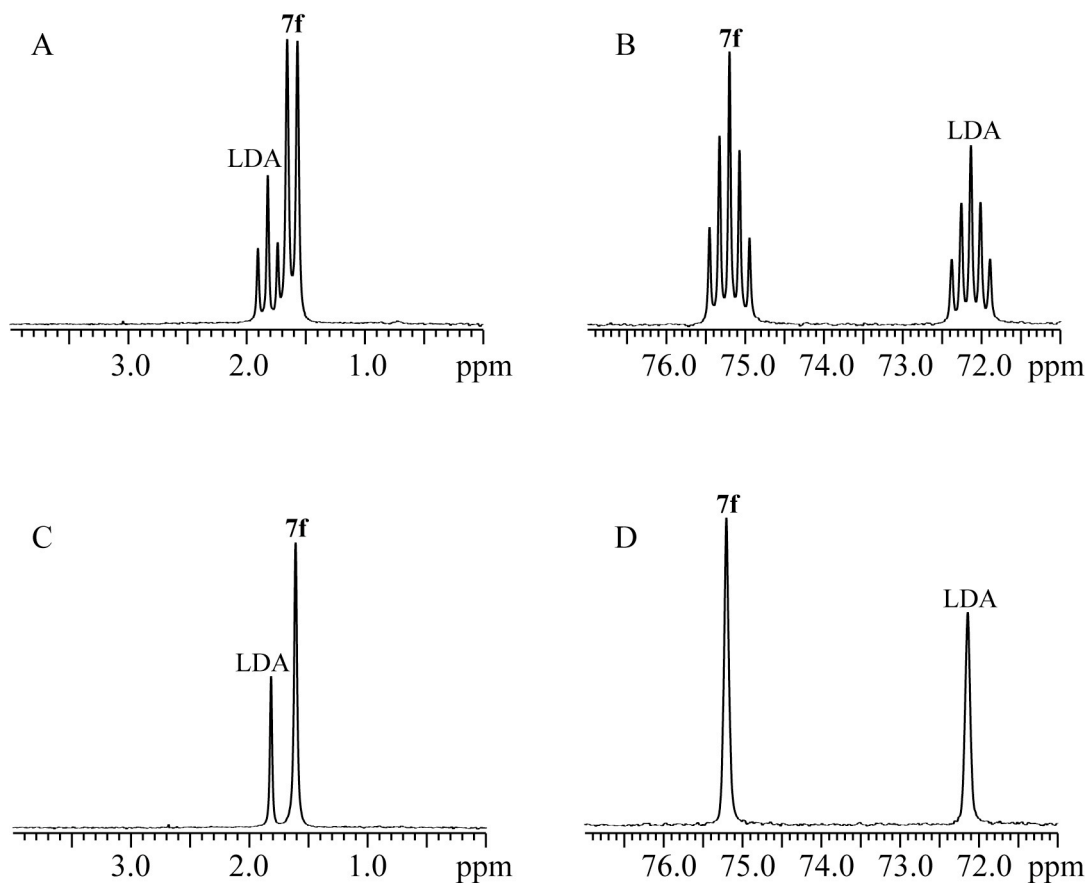

**Figure 18.**  ${}^6\text{Li}$  and  ${}^{15}\text{N}$  NMR spectra of 0.25 M [ ${}^6\text{Li}$ ,  ${}^{15}\text{N}$ ]LDA with 0.40 equiv **4e** in 8.0 M DME/pentane at  $-70\text{ }^\circ\text{C}$ : (A)  ${}^6\text{Li}$  spectrum; (B)  ${}^{15}\text{N}$  spectrum; (C)  ${}^6\text{Li}\{{}^{15}\text{N}\}$  spectrum; (D)  ${}^{15}\text{N}\{{}^6\text{Li}\}$  spectrum.

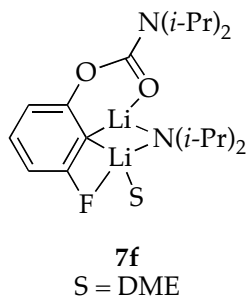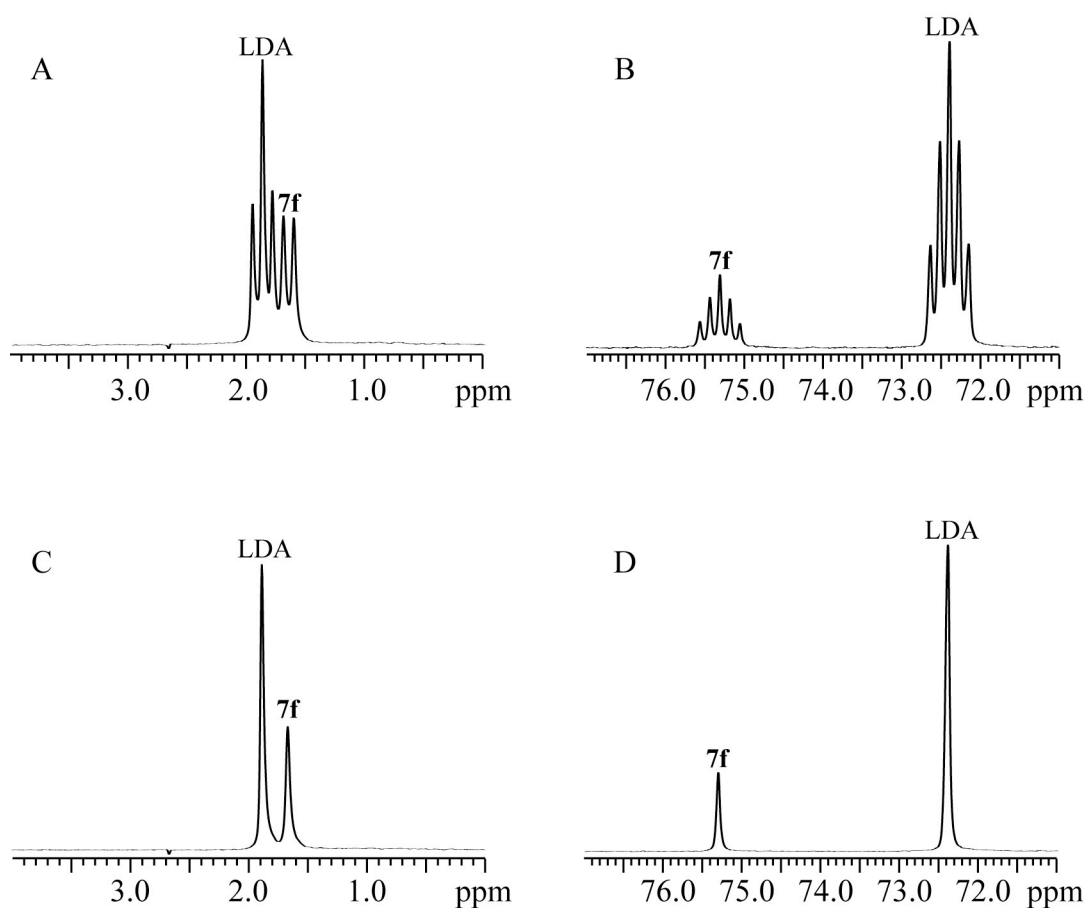

**Figure 19.**  ${}^6\text{Li}$  and  ${}^{15}\text{N}$  NMR spectra of 0.35 M [ ${}^6\text{Li}$ ,  ${}^{15}\text{N}$ ]LDA with 0.30 equiv **4e** in 5.0 M DME/pentane at  $-70\text{ }^\circ\text{C}$ : (A)  ${}^6\text{Li}$  spectrum; (B)  ${}^{15}\text{N}$  spectrum; (C)  ${}^6\text{Li}\{{}^{15}\text{N}\}$  spectrum; (D)  ${}^{15}\text{N}\{{}^6\text{Li}\}$  spectrum.

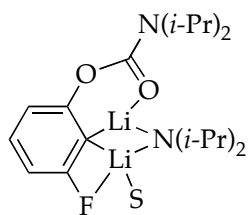

7f  
S = DME

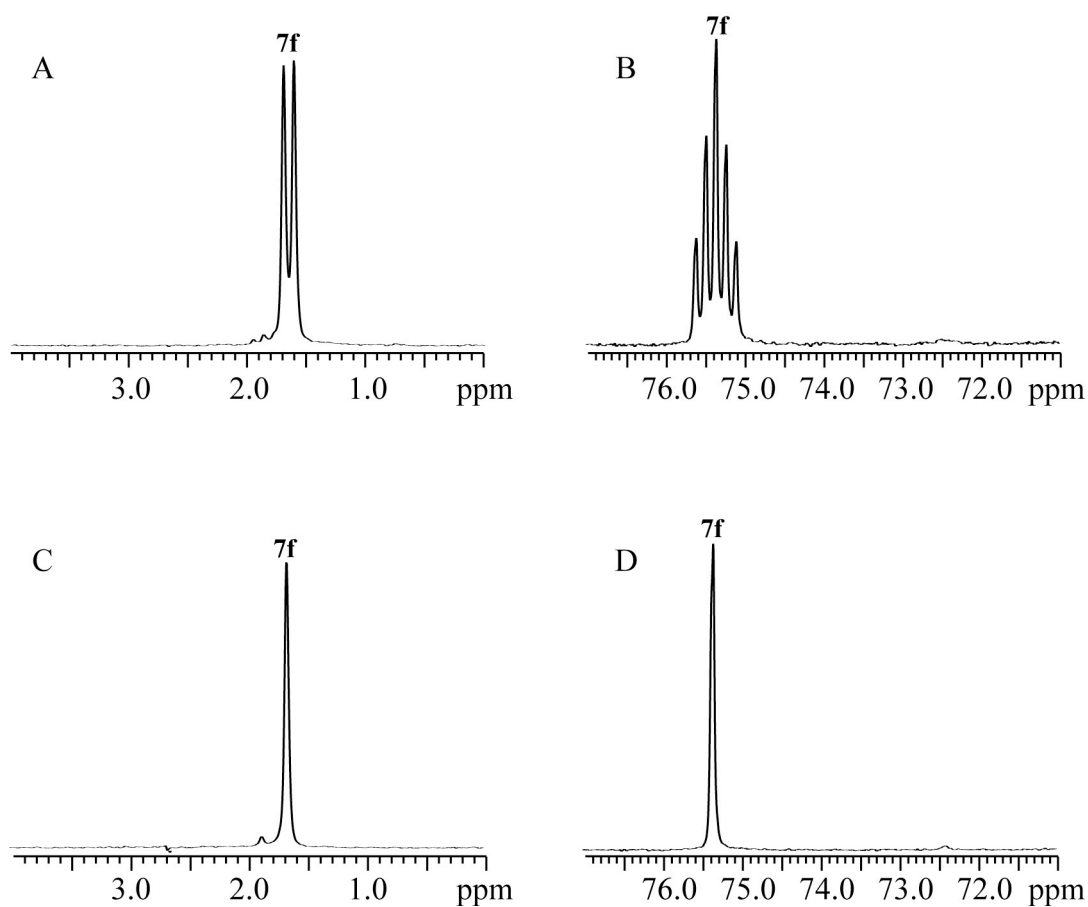

**Figure 20.**  $^6\text{Li}$  and  $^{15}\text{N}$  NMR spectra of 0.20 M [ $^6\text{Li}$ ,  $^{15}\text{N}$ ]LDA with 0.50 equiv **4e** in 5.0 M DME/pentane at  $-70\text{ }^\circ\text{C}$ : (A)  $^6\text{Li}$  spectrum; (B)  $^{15}\text{N}$  spectrum; (C)  $^6\text{Li}\{^{15}\text{N}\}$  spectrum; (D)  $^{15}\text{N}\{^6\text{Li}\}$  spectrum.

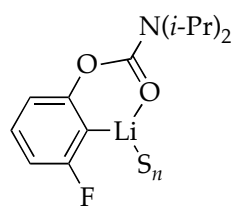

**6f**  
S = DME

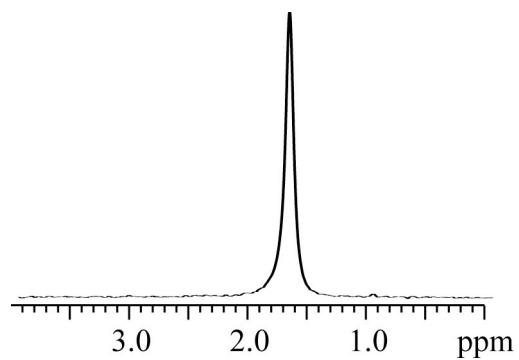

**Figure 21.**  ${}^6\text{Li}$  NMR spectrum of 0.10 M [ ${}^6\text{Li}, {}^{15}\text{N}$ ]LDA with 1.0 equiv **4e** in 6.4 M DME/pentane at  $-90\text{ }^\circ\text{C}$ .

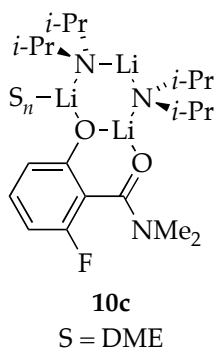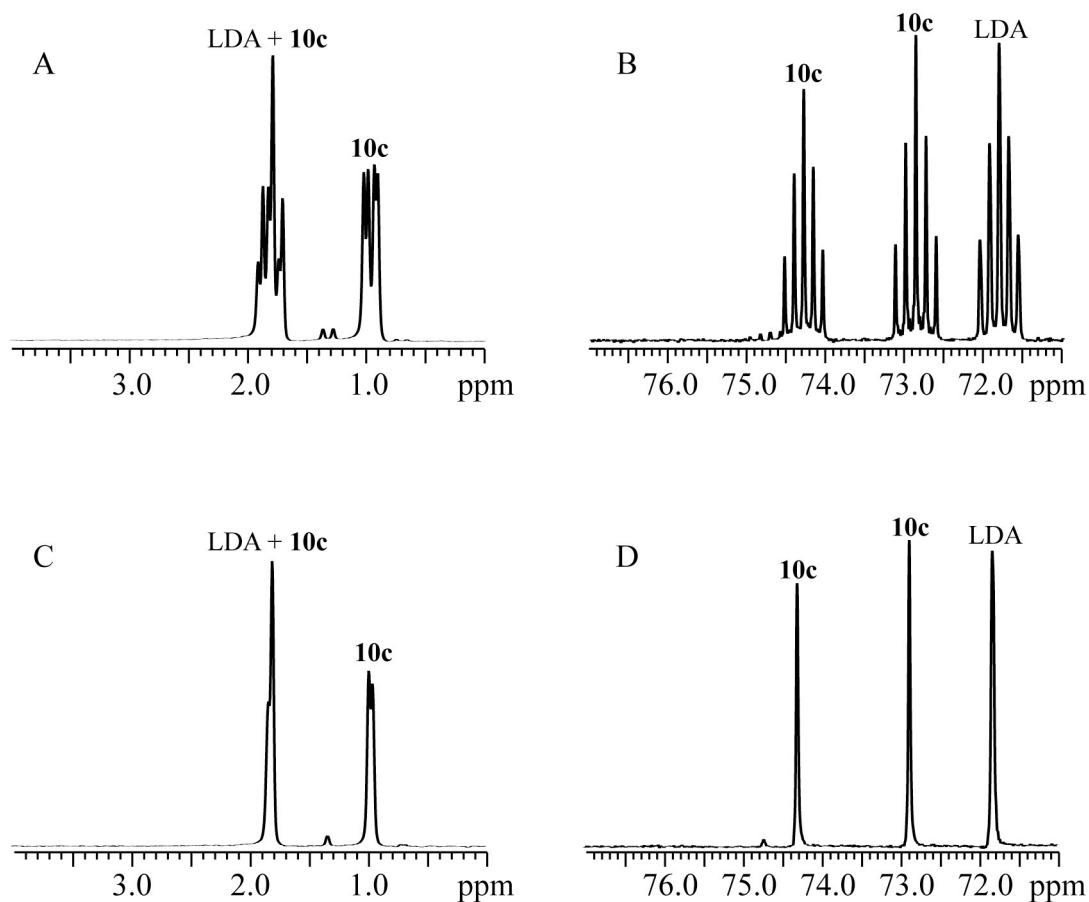

**Figure 22.**  ${}^6\text{Li}$  and  ${}^{15}\text{N}$  NMR spectra of 0.40 M [ ${}^6\text{Li}$ ,  ${}^{15}\text{N}$ ]LDA with 0.25 equiv **4d** in 6.0 M DME/pentane at  $-85\text{ }^\circ\text{C}$  after aging at  $-50\text{ }^\circ\text{C}$  for 30 min: (A)  ${}^6\text{Li}$  spectrum; (B)  ${}^{15}\text{N}$  spectrum; (C)  ${}^6\text{Li}\{{}^{15}\text{N}\}$  spectrum; (D)  ${}^{15}\text{N}\{{}^6\text{Li}\}$  spectrum.

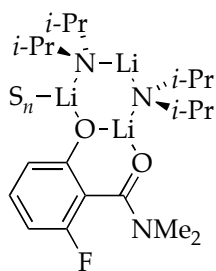

10c

S = DME

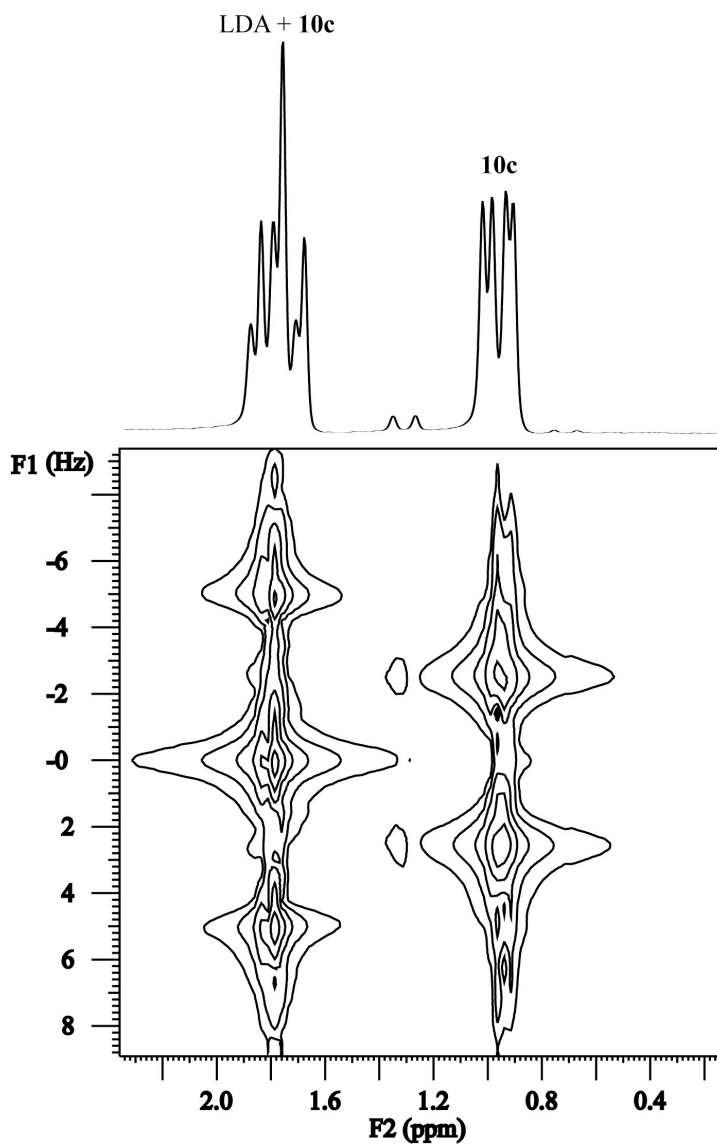

**Figure 23.**  $^1J(^6\text{Li}, ^{15}\text{N})$ -resolved NMR spectrum of 0.40 M  $[^6\text{Li}, ^{15}\text{N}]$ LDA with 0.25 equiv of **4d** in 6.0 M DME/pentane at  $-85\text{ }^\circ\text{C}$  after aging at  $-50\text{ }^\circ\text{C}$  for 30 min.

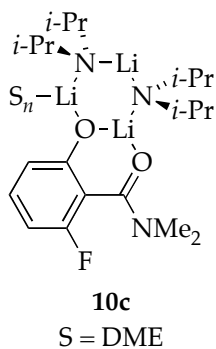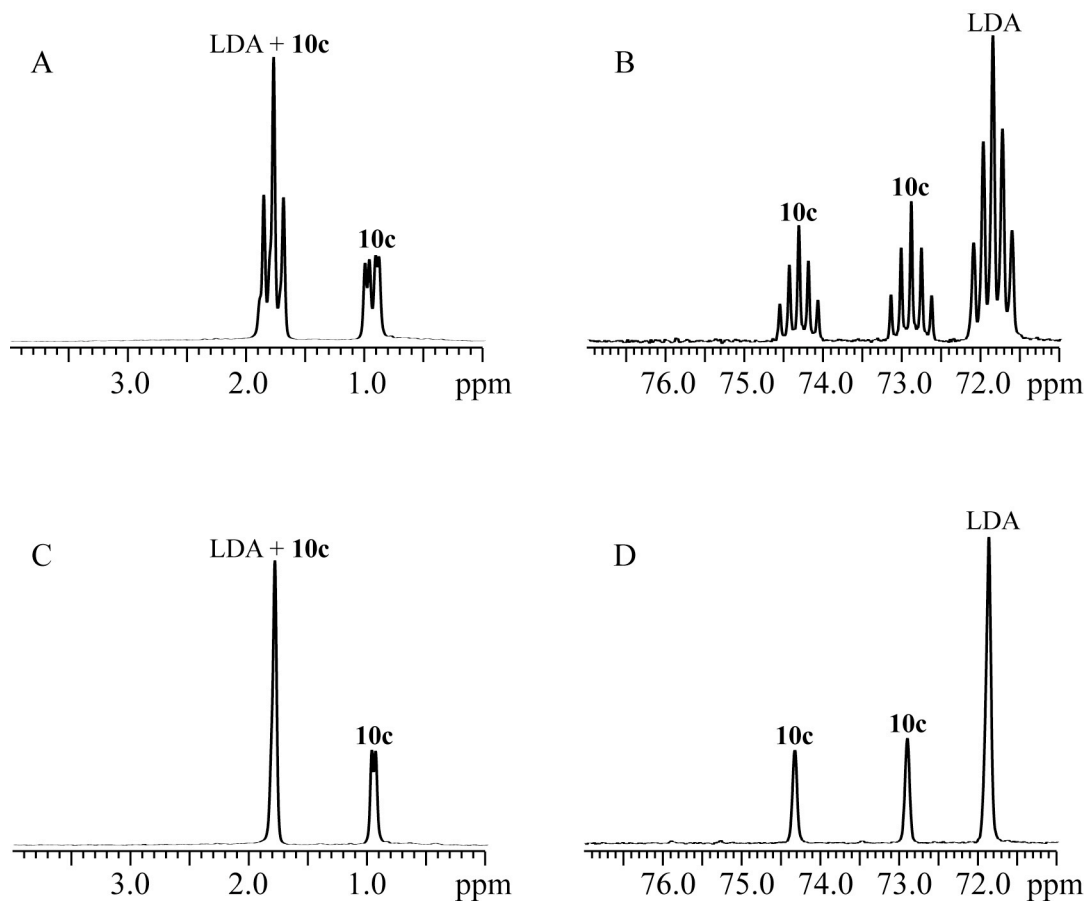

**Figure 24.**  $^6\text{Li}$  and  $^{15}\text{N}$  NMR spectra of 0.40 M [ $^6\text{Li}$ ,  $^{15}\text{N}$ ]LDA with 0.25 equiv 5c in 6.0 M DME/pentane at  $-85^\circ\text{C}$ : (A)  $^6\text{Li}$  spectrum; (B)  $^{15}\text{N}$  spectrum; (C)  $^6\text{Li}\{^{15}\text{N}\}$  spectrum; (D)  $^{15}\text{N}\{^6\text{Li}\}$  spectrum.

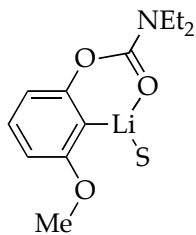

**6g**  
S = TMCDA

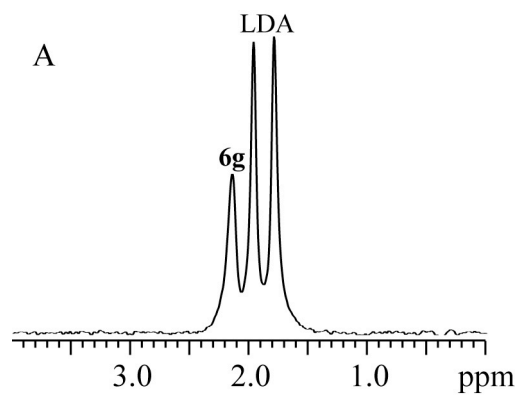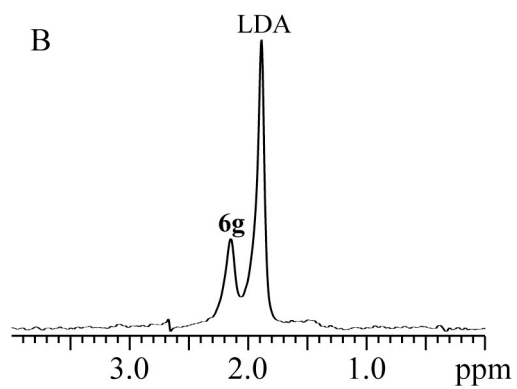

**Figure 25.**  ${}^6\text{Li}$  NMR spectra of 0.25 M [ ${}^6\text{Li}, {}^{15}\text{N}$ ]LDA with 0.40 equiv **4b** in 1.0 M *R,R*-TMCDA/toluene/pentane at  $-70\text{ }^\circ\text{C}$ : (A)  ${}^6\text{Li}$  spectrum; (B)  ${}^6\text{Li}\{{}^{15}\text{N}\}$  spectrum.



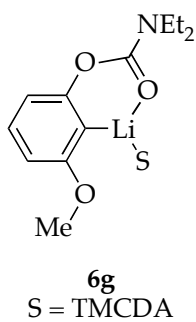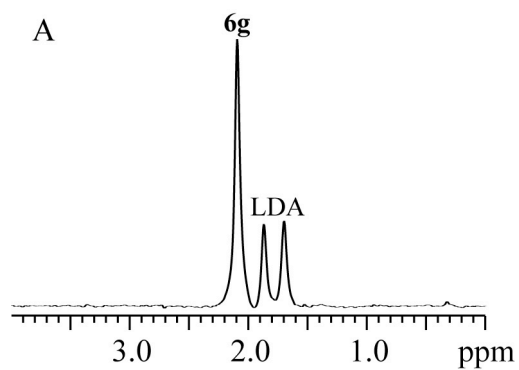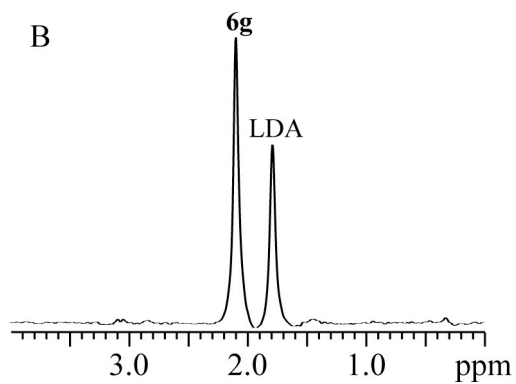

**Figure 26.**  ${}^6\text{Li}$  NMR spectra of 0.15 M [ ${}^6\text{Li}, {}^{15}\text{N}$ ]LDA with 0.60 equiv **4b** in 1.0 M *trans*-TMEDA/toluene/pentane at  $-70\text{ }^\circ\text{C}$ : (A)  ${}^6\text{Li}$  spectrum; (B)  ${}^6\text{Li}\{{}^{15}\text{N}\}$  spectrum.

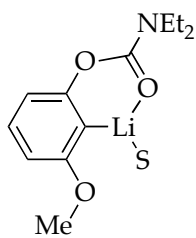

**6g**  
S = TMCDA

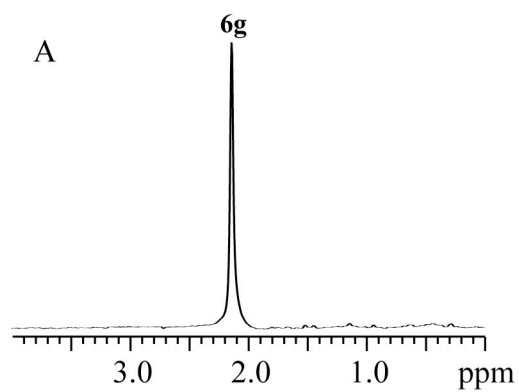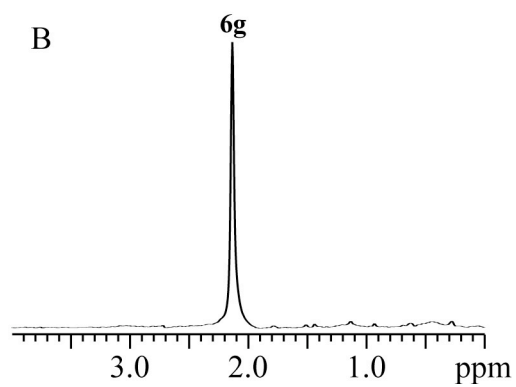

**Figure 27.**  ${}^6\text{Li}$  NMR spectra of 0.10 M [ ${}^6\text{Li}, {}^{15}\text{N}$ ]LDA with 1.0 equiv **4b** in 1.0 M *trans*-TMCDA/toluene/pentane at  $-70^\circ\text{C}$ : (A)  ${}^6\text{Li}$  spectrum; (B)  ${}^6\text{Li}\{{}^{15}\text{N}\}$  spectrum.

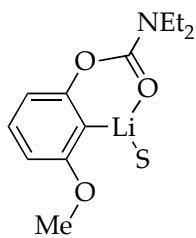

**6g**  
S = TMCDA

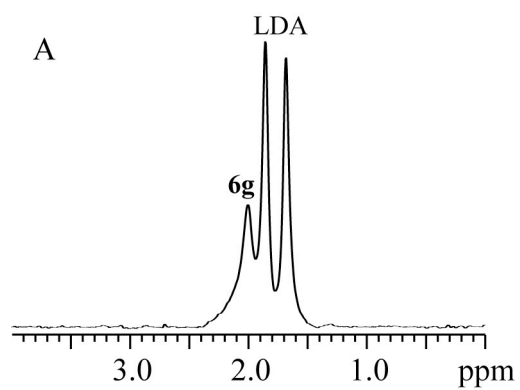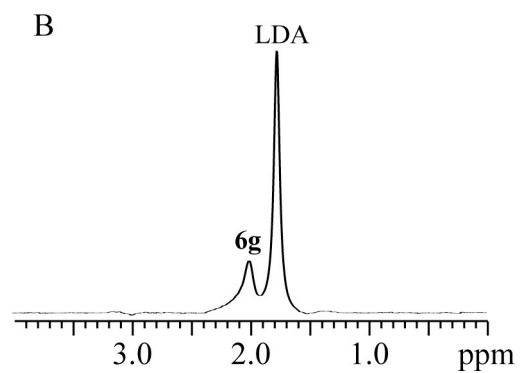

**Figure 28.**  ${}^6\text{Li}$  NMR spectra of 0.30 M [ ${}^6\text{Li}$ ,  ${}^{15}\text{N}$ ]LDA with 0.30 equiv **4b** in 1.0 M *trans*-TMCDA/toluene/pentane at  $-70\text{ }^\circ\text{C}$ : (A)  ${}^6\text{Li}$  spectrum; (B)  ${}^6\text{Li}\{{}^{15}\text{N}\}$  spectrum.

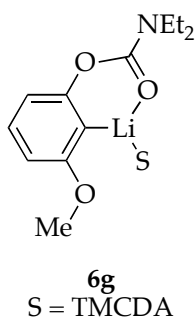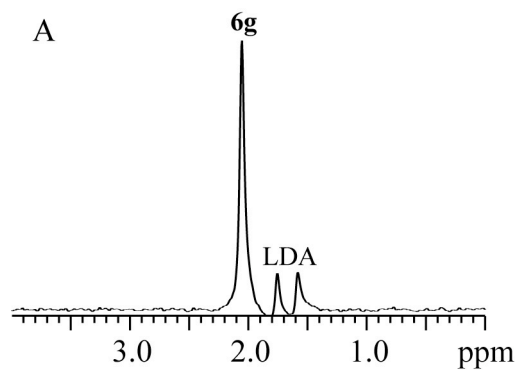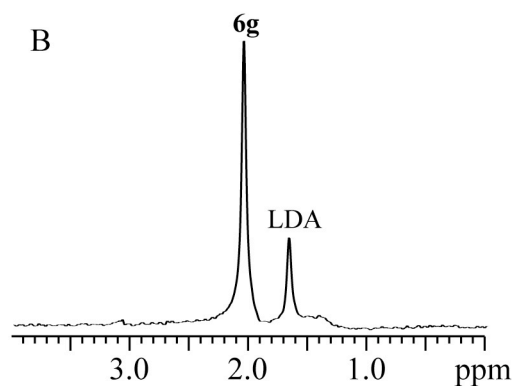

**Figure 29.**  ${}^6\text{Li}$  NMR spectra of 0.15 M  $[{}^6\text{Li}, {}^{15}\text{N}]$ LDA with 0.60 equiv **4b** in 0.10 M *trans*-TMEDA/toluene/pentane at  $-70\text{ }^\circ\text{C}$ : (A)  ${}^6\text{Li}$  spectrum; (B)  ${}^6\text{Li}\{{}^{15}\text{N}\}$  spectrum.

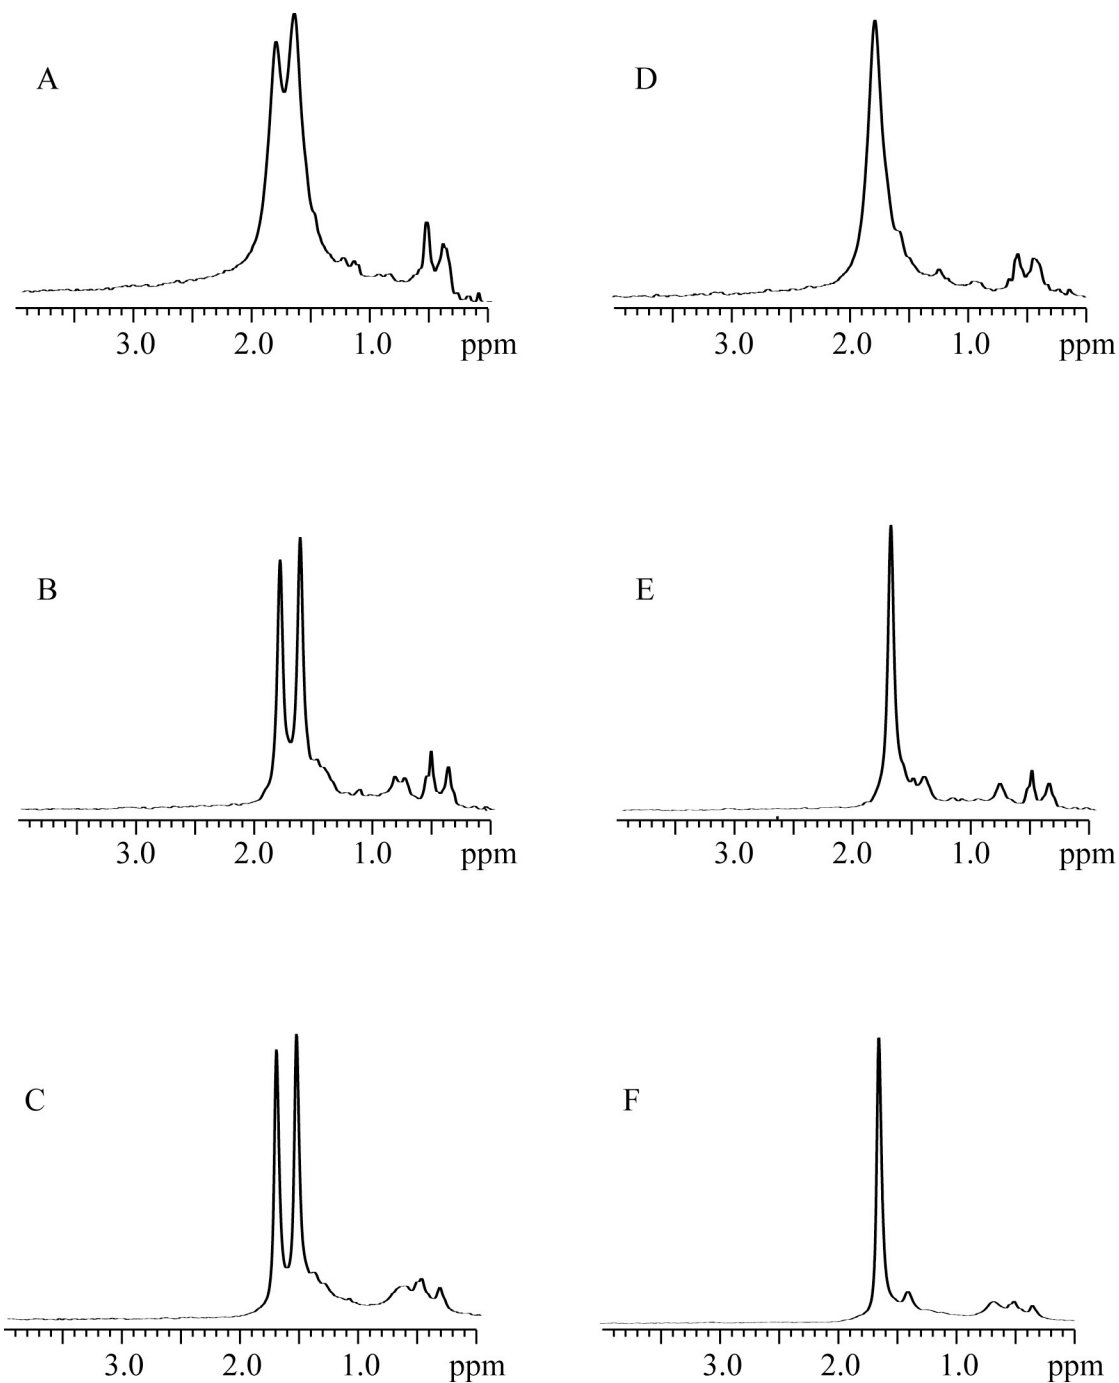

**Figure 30.**  ${}^6\text{Li}$  and  ${}^6\text{Li}\{^{15}\text{N}\}$  NMR spectra of 0.40 M [ ${}^6\text{Li},^{15}\text{N}$ ]LDA with 0.25 equiv of **4b** in 1.4 M *R,R*-TMEDA/toluene/pentane at various temperatures.  ${}^6\text{Li}$ : (A) -50 °C; (B) -70 °C; (C) -90 °C.  ${}^6\text{Li}\{^{15}\text{N}\}$ : (D) -50 °C; (E) -70 °C; (F) -90 °C.

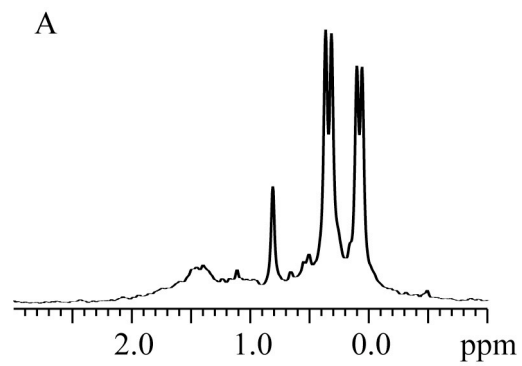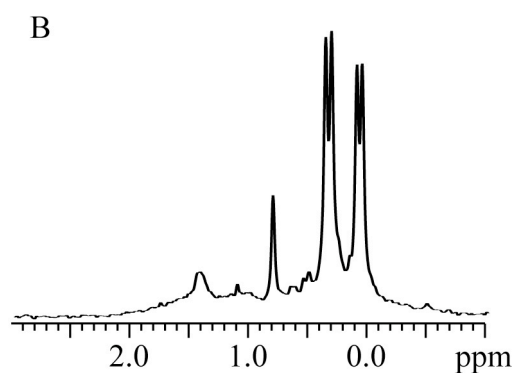

**Figure 31.**  ${}^6\text{Li}$  NMR spectra of 0.10 M [ ${}^6\text{Li}, {}^{15}\text{N}$ ]LDA and with 1.0 equiv **5b** in 1.4 M *R,R*-TMEDA/toluene/pentane at  $-80\text{ }^\circ\text{C}$ : (A)  ${}^6\text{Li}$  spectrum; (B)  ${}^6\text{Li}\{{}^{15}\text{N}\}$  spectrum.

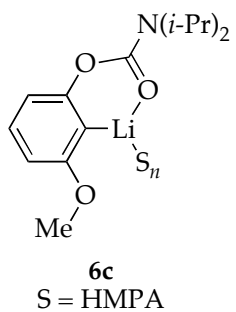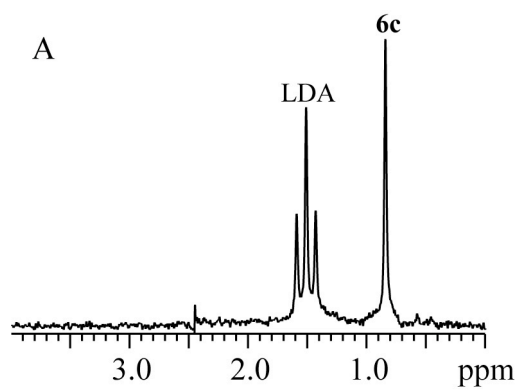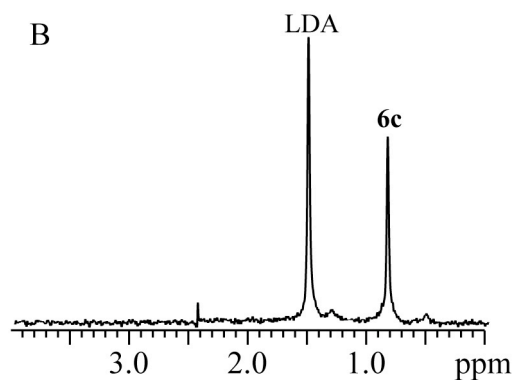

**Figure 32.**  ${}^6\text{Li}$  NMR spectra of 0.10 M [ ${}^6\text{Li}$ ,  ${}^{15}\text{N}$ ]LDA with 0.25 equiv **4c** in 0.10 M HMPA/10.0 M THF/pentane at  $-90\text{ }^\circ\text{C}$ : (A)  ${}^6\text{Li}$  spectrum; (B)  ${}^6\text{Li}\{{}^{15}\text{N}\}$  spectrum.

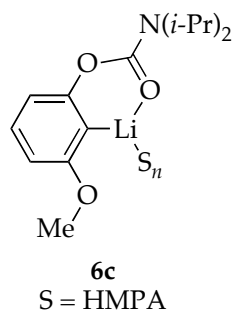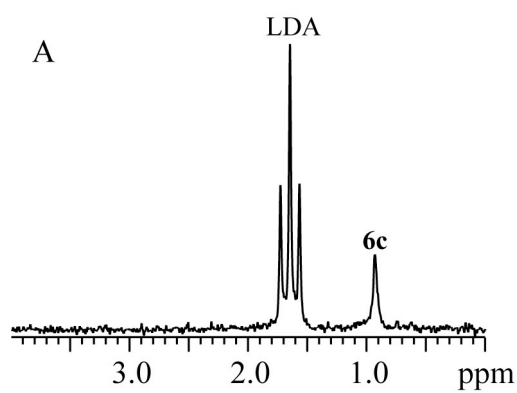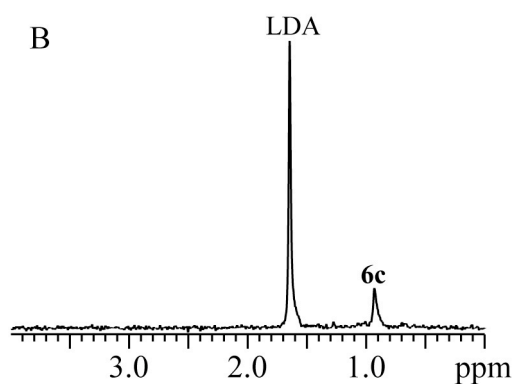

**Figure 33.**  ${}^6\text{Li}$  NMR spectra of 0.10 M [ ${}^6\text{Li}, {}^{15}\text{N}$ ]LDA with 0.25 equiv **4c** in 0.40 M HMPA/10.0 M THF/pentane at  $-90\text{ }^\circ\text{C}$ : (A)  ${}^6\text{Li}$  spectrum; (B)  ${}^6\text{Li}\{{}^{15}\text{N}\}$  spectrum.



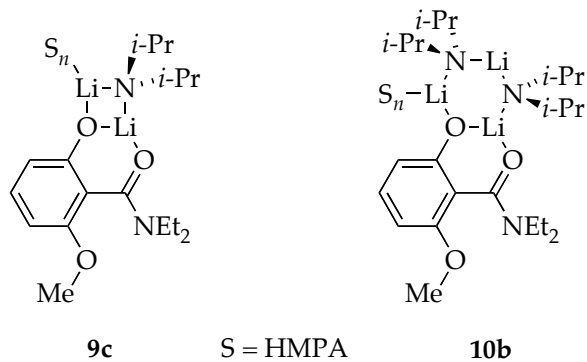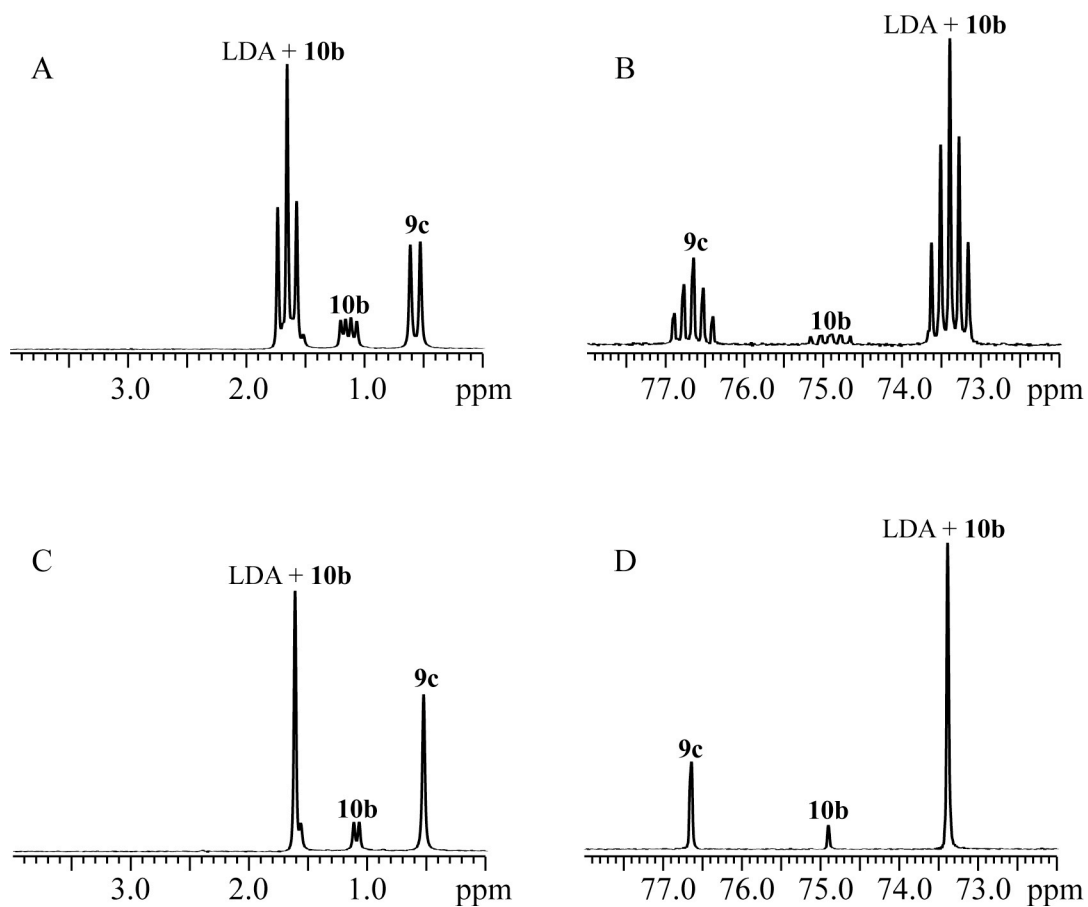

**Figure 34.**  ${}^6\text{Li}$  and  ${}^{15}\text{N}$  NMR spectra of 0.40 M [ ${}^6\text{Li}$ ,  ${}^{15}\text{N}$ ]LDA with 0.25 equiv **4b** in 1.0 M HMPA/8.2 M THF/pentane at  $-90\text{ }^\circ\text{C}$ : (A)  ${}^6\text{Li}$  spectrum; (B)  ${}^{15}\text{N}$  spectrum; (C)  ${}^6\text{Li}\{{}^{15}\text{N}\}$  spectrum; (D)  ${}^{15}\text{N}\{{}^6\text{Li}\}$  spectrum.

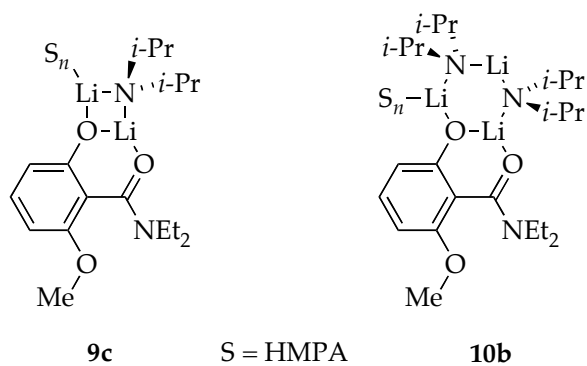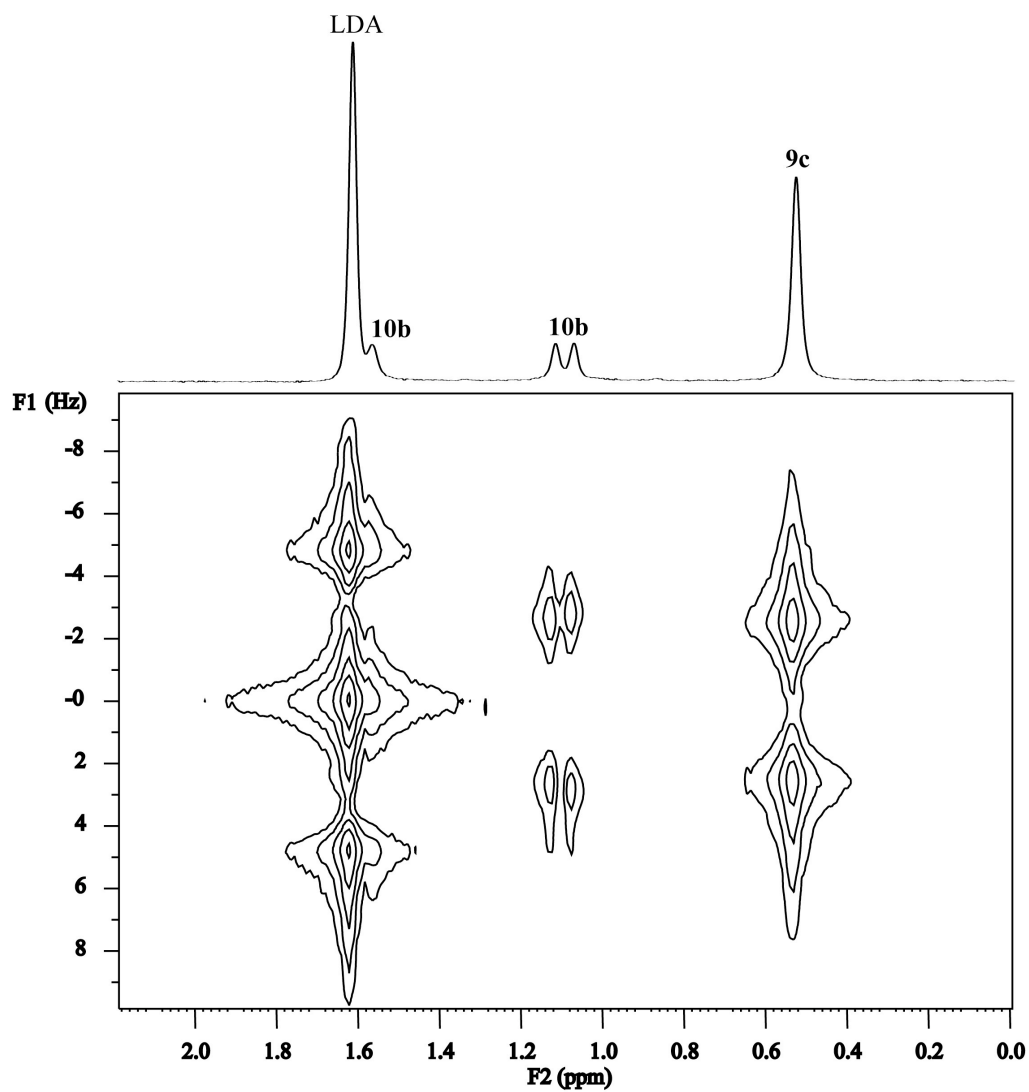

**Figure 35.**  $1J(^6\text{Li}, ^{15}\text{N})$ -resolved NMR spectrum of 0.40 M  $[^6\text{Li}, ^{15}\text{N}]$ LDA with 0.25 equiv of **4b** in 1.0 M HMPA/8.2 M THF/pentane at  $-90\text{ }^\circ\text{C}$ .

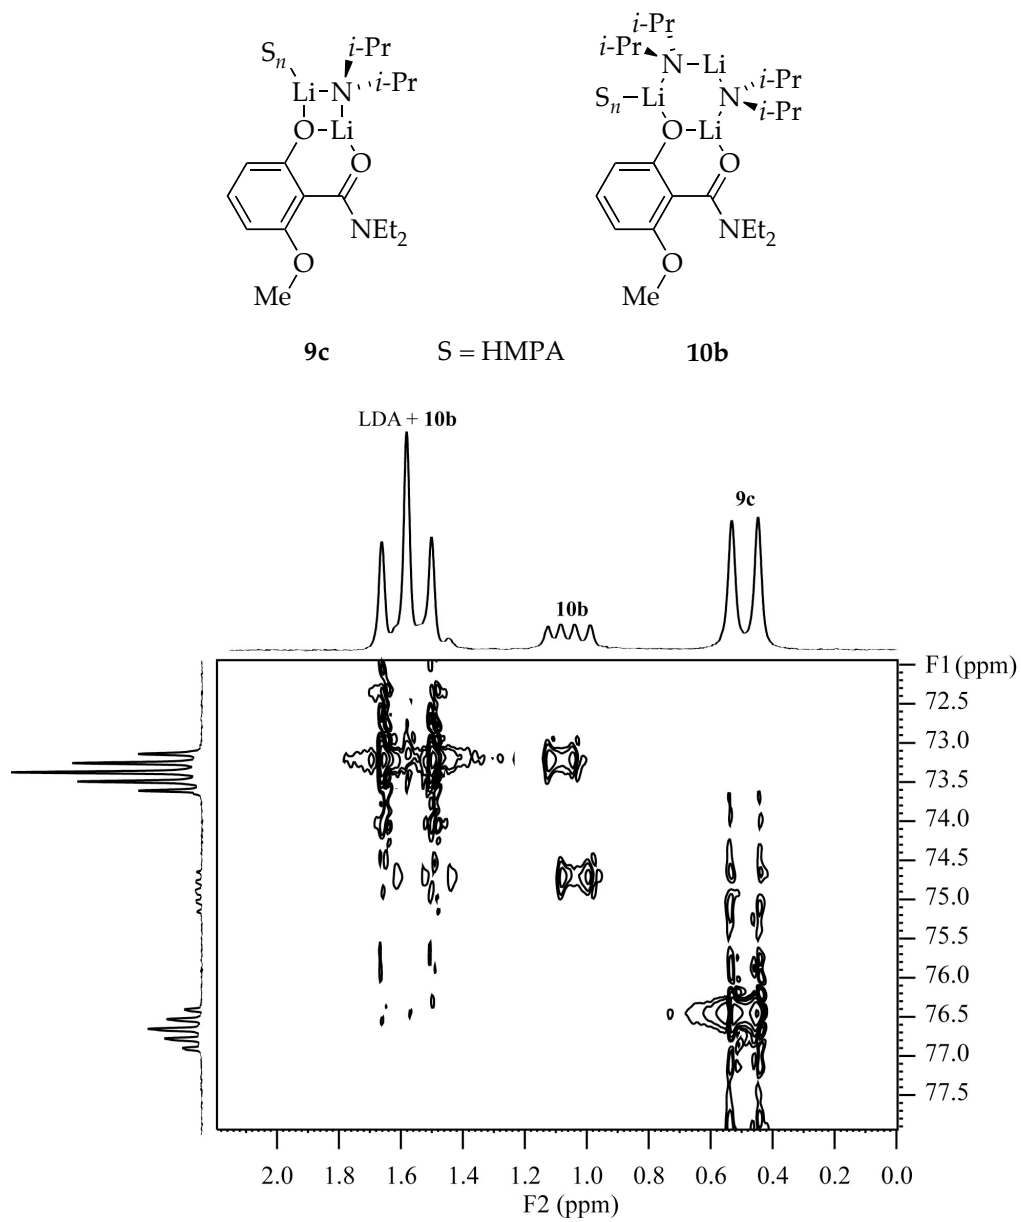

**Figure 36.** ( $^6\text{Li}$ ,  $^{15}\text{N}$ )-HSQC NMR spectrum of 0.40 M [ $^6\text{Li}$ ,  $^{15}\text{N}$ ]LDA with 0.25 equiv of **4b** in 1.0 M HMPA/8.2 M THF/pentane at  $-90^\circ\text{C}$ .

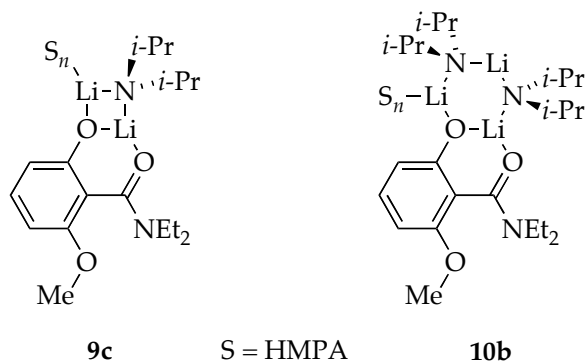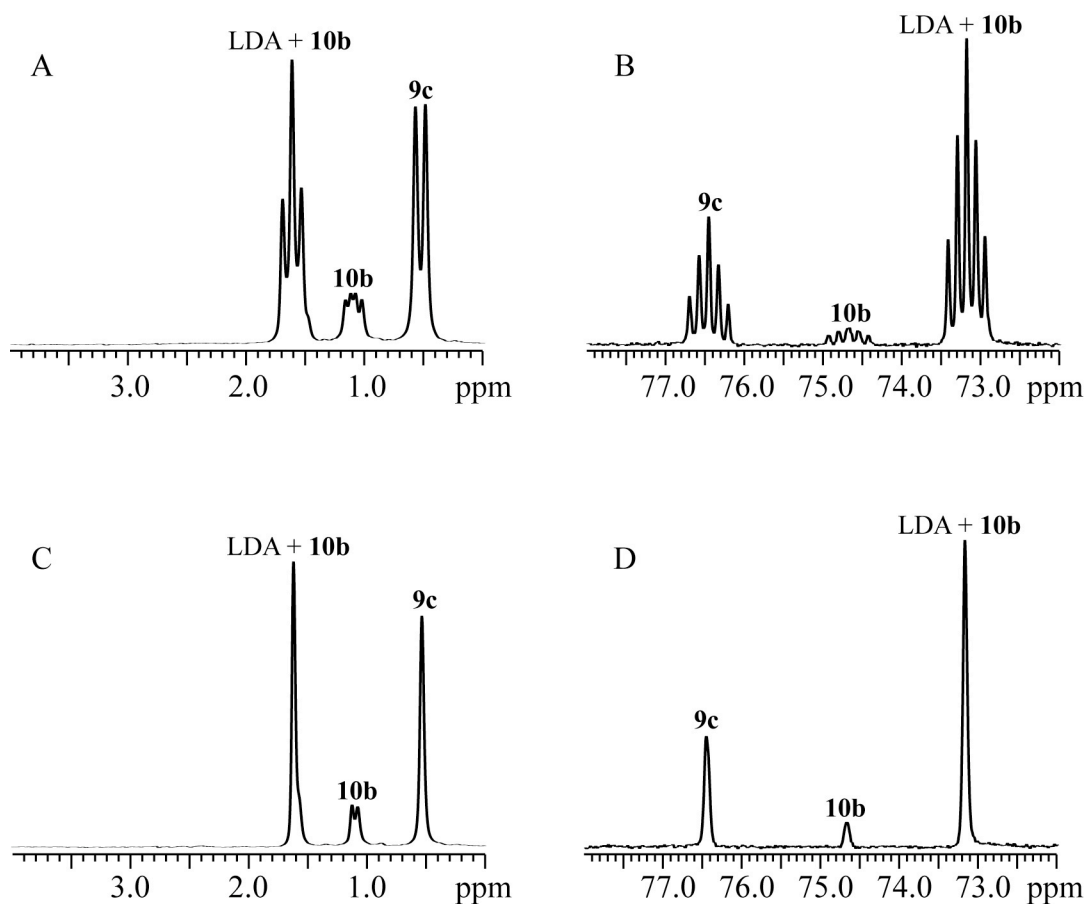

**Figure 37.**  $^6\text{Li}$  and  $^{15}\text{N}$  NMR spectra of 0.40 M [ $^6\text{Li}$ ,  $^{15}\text{N}$ ]LDA with 0.25 equiv **5b** in 1.0 M HMPA/8.2 M THF/pentane at  $-90\text{ }^\circ\text{C}$ : (A)  $^6\text{Li}$  spectrum; (B)  $^{15}\text{N}$  spectrum; (C)  $^6\text{Li}\{^{15}\text{N}\}$  spectrum; (D)  $^{15}\text{N}\{^6\text{Li}\}$  spectrum.

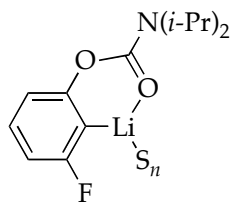

**6e**  
S = HMPA

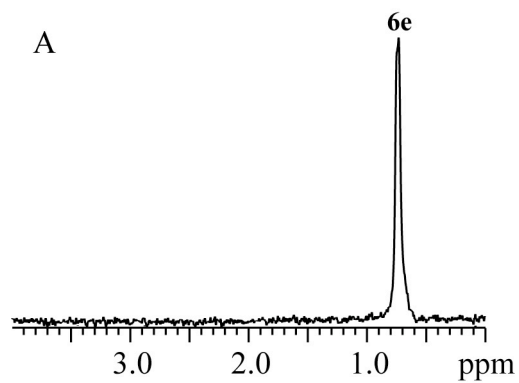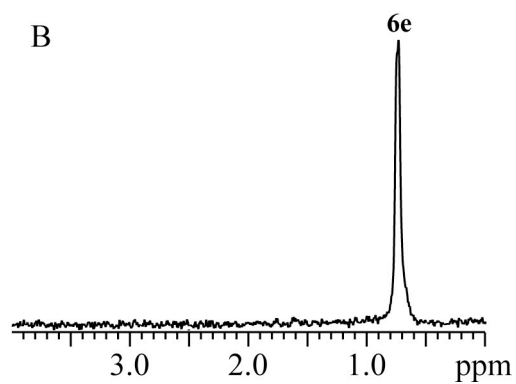

**Figure 38.**  ${}^6\text{Li}$  NMR spectra of 0.10 M [ ${}^6\text{Li}$ ,  ${}^{15}\text{N}$ ]LDA with 1.0 equiv **4e** in 0.40 M HMPA/10.0 M THF/pentane at  $-90\text{ }^\circ\text{C}$ : (A)  ${}^6\text{Li}$  spectrum; (B)  ${}^6\text{Li}\{{}^{15}\text{N}\}$  spectrum.

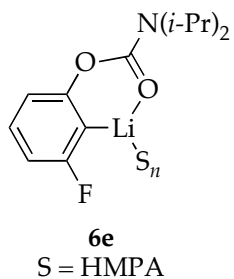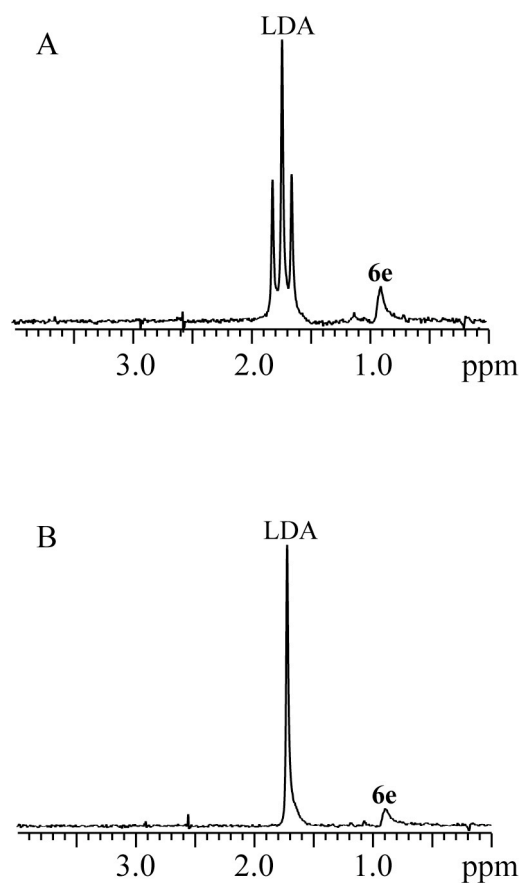

**Figure 39.**  ${}^6\text{Li}$  NMR spectra of 0.10 M  $[{}^6\text{Li}, {}^{15}\text{N}]$ LDA with 0.25 equiv **4e** in 0.40 M HMPA/10.0 M THF/pentane at  $-90\text{ }^\circ\text{C}$ : (A)  ${}^6\text{Li}$  spectrum; (B)  ${}^6\text{Li}\{{}^{15}\text{N}\}$  spectrum.

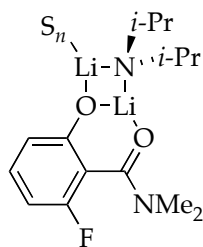

**9d**  
S = HMPA

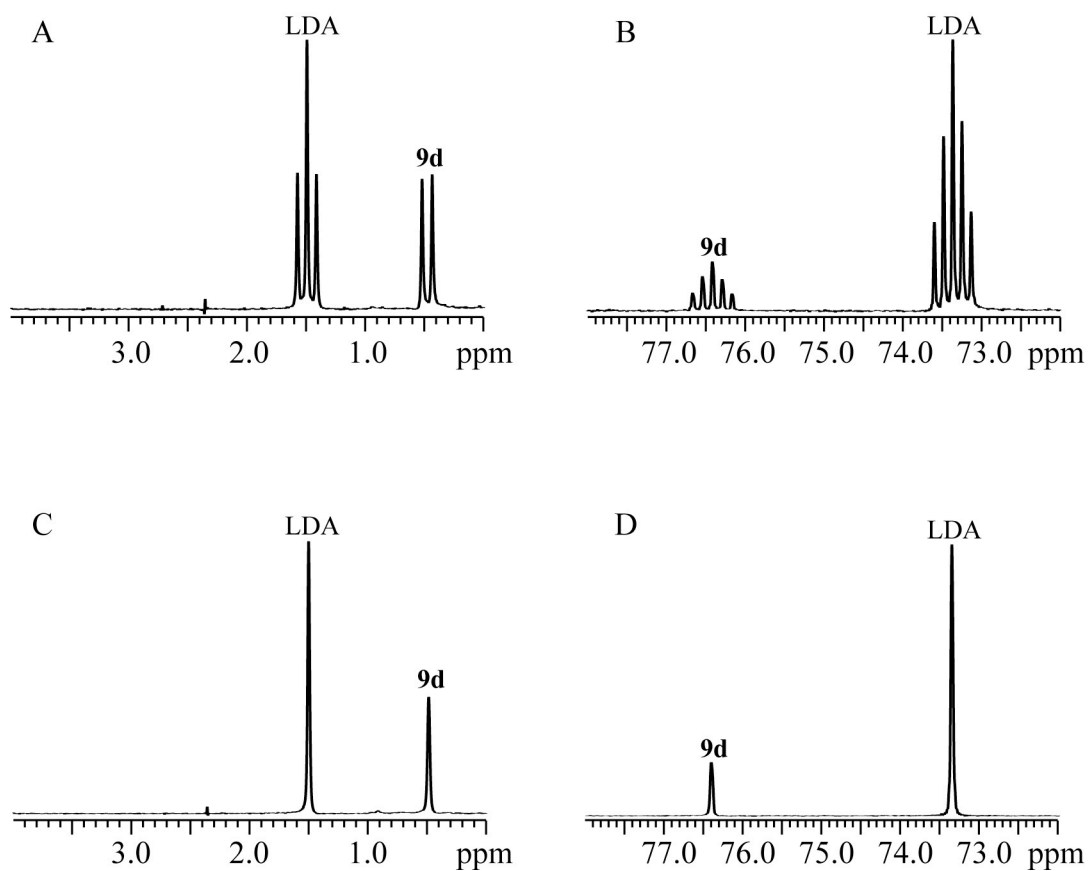

**Figure 40.**  $^6\text{Li}$  and  $^{15}\text{N}$  NMR spectra of 0.40 M [ $^6\text{Li}$ ,  $^{15}\text{N}$ ]LDA with 0.25 equiv **4d** in 1.0 M HMPA/8.2 M THF/pentane at  $-90^\circ\text{C}$ : (A)  $^6\text{Li}$  spectrum; (B)  $^{15}\text{N}$  spectrum; (C)  $^6\text{Li}\{^{15}\text{N}\}$  spectrum; (D)  $^{15}\text{N}\{^6\text{Li}\}$  spectrum.

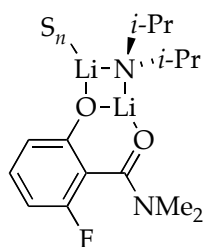

**9d**  
S = HMPA

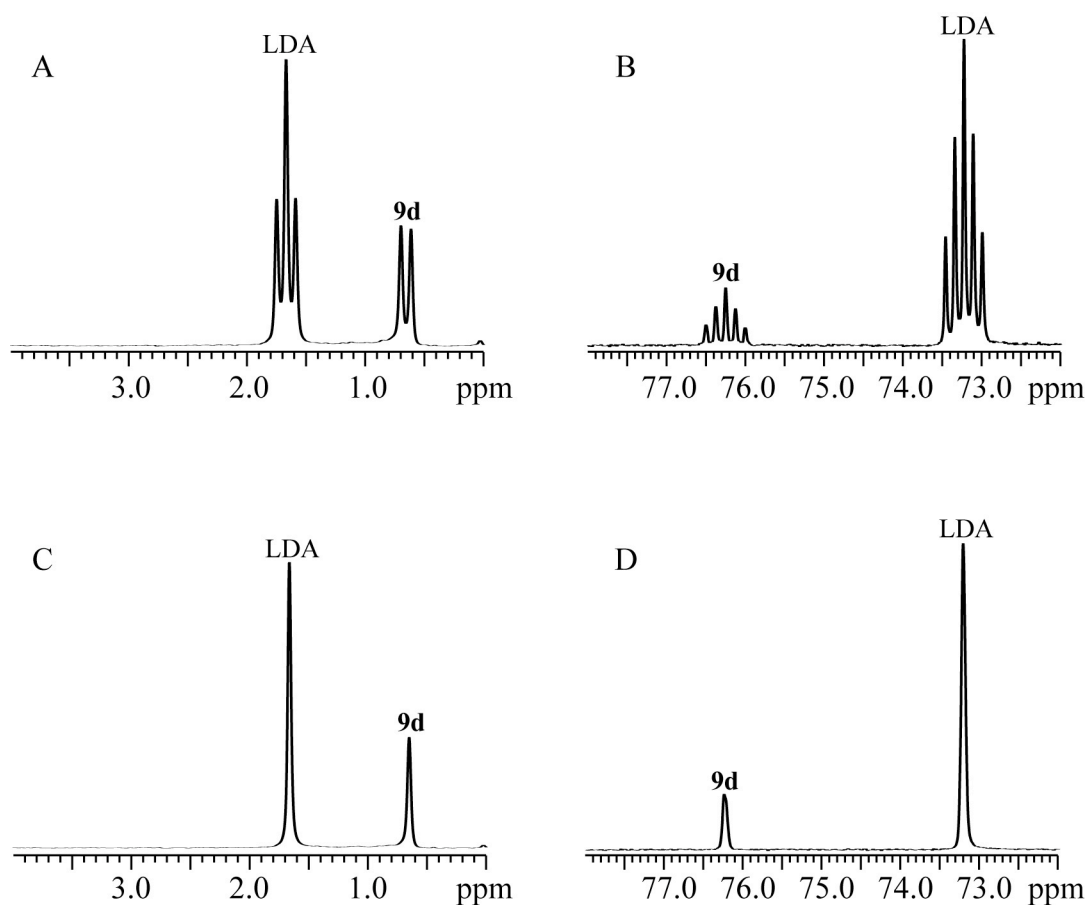

**Figure 41.**  $^6\text{Li}$  and  $^{15}\text{N}$  NMR spectra of 0.40 M [ $^6\text{Li}$ ,  $^{15}\text{N}$ ]LDA with 0.25 equiv **5c** in 1.0 M HMPA/8.2 M THF/pentane at -90 °C: (A)  $^6\text{Li}$  spectrum; (B)  $^{15}\text{N}$  spectrum; (C)  $^6\text{Li}\{^{15}\text{N}\}$  spectrum; (D)  $^{15}\text{N}\{^6\text{Li}\}$  spectrum.



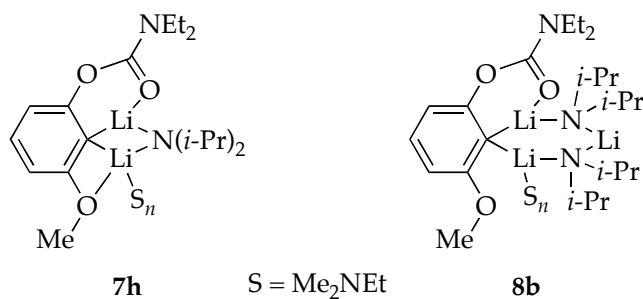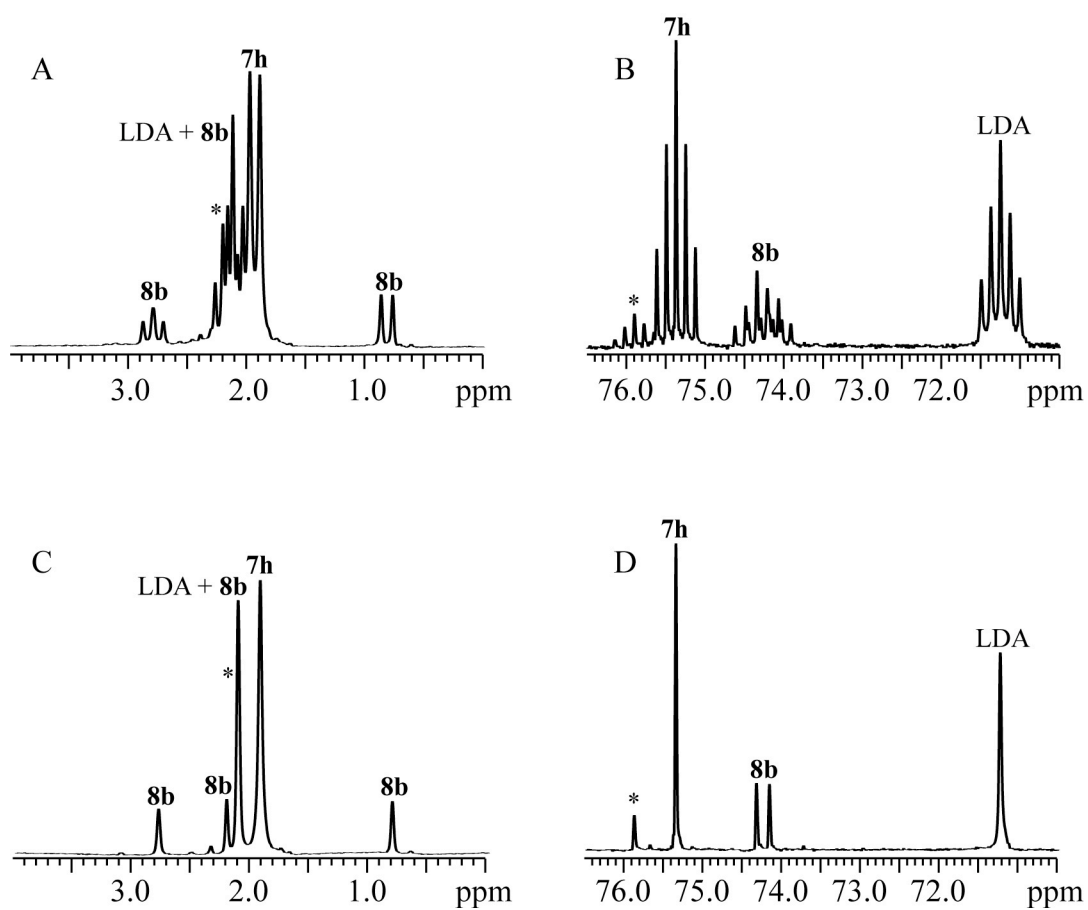

**Figure 42.**  ${}^6Li$  and  ${}^{15}N$  NMR spectra of 0.40 M [ ${}^6Li$ ,  ${}^{15}N$ ]LDA with 0.25 equiv **4b** in 3.0 M  $Me_2NEt$ /toluene/pentane at  $-100\text{ }^\circ C$ : (A)  ${}^6Li$  spectrum; (B)  ${}^{15}N$  spectrum; (C)  ${}^6Li\{{}^{15}N\}$  spectrum; (D)  ${}^{15}N\{{}^6Li\}$  spectrum. \*Unassigned  ${}^6Li$  doublet and  ${}^{15}N$  quintet.

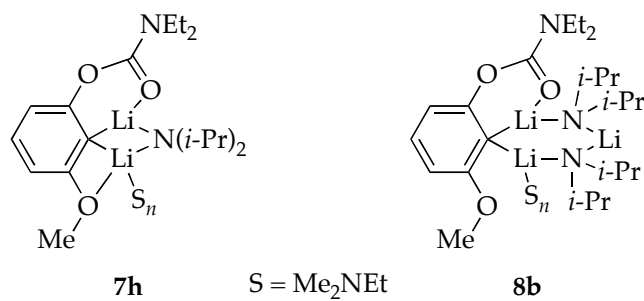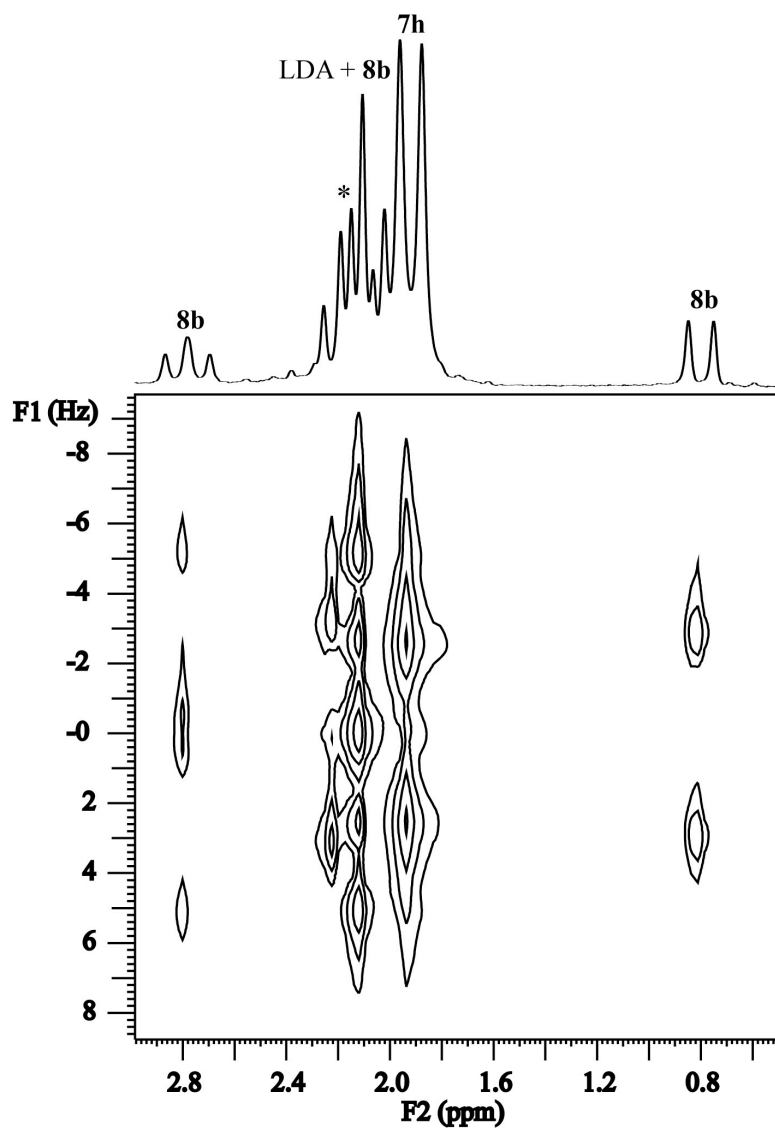

**Figure 43.**  $1J(^6\text{Li}, ^{15}\text{N})$ -resolved NMR spectrum of 0.40 M  $[^6\text{Li}, ^{15}\text{N}]$ LDA with 0.25 equiv of **4b** in 3.0 M  $\text{Me}_2\text{NEt}$ /toluene/pentane at  $-100\text{ }^\circ\text{C}$ . \* Unassigned  $^6\text{Li}$  doublet and  $^{15}\text{N}$  quintet.

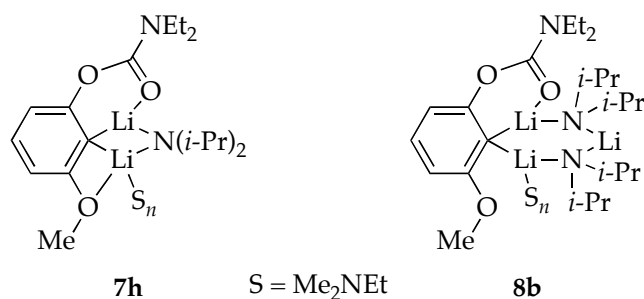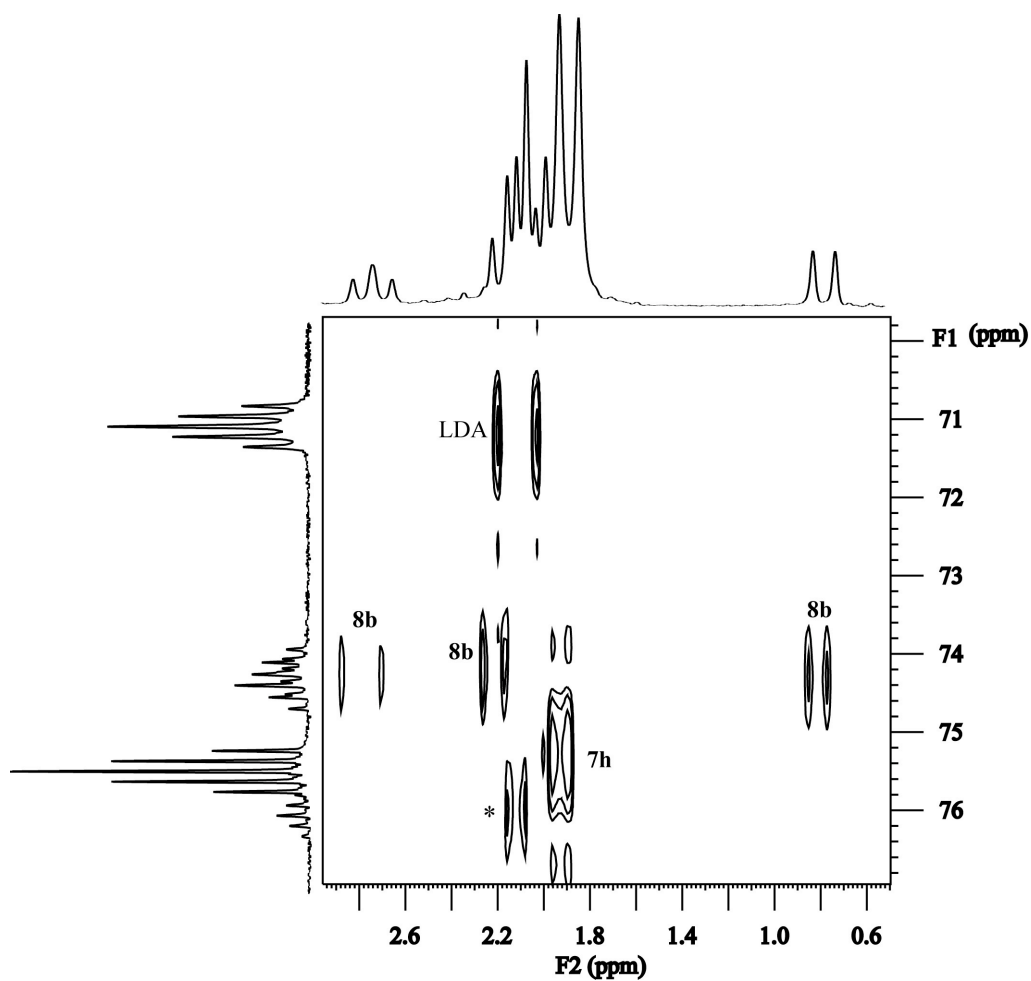

**Figure 44.** ( $^6\text{Li}$ ,  $^{15}\text{N}$ )-HSQC NMR spectrum of 0.40 M [ $^6\text{Li}$ ,  $^{15}\text{N}$ ]LDA with 0.25 equiv of **4b** in 3.0 M  $\text{Me}_2\text{NEt}$ /toluene/pentane at  $-100^\circ\text{C}$ . \*Unassigned  $^6\text{Li}$  doublet and  $^{15}\text{N}$  quintet.

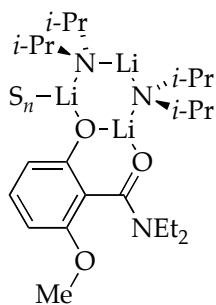

**10e**

S = Me<sub>2</sub>NEt

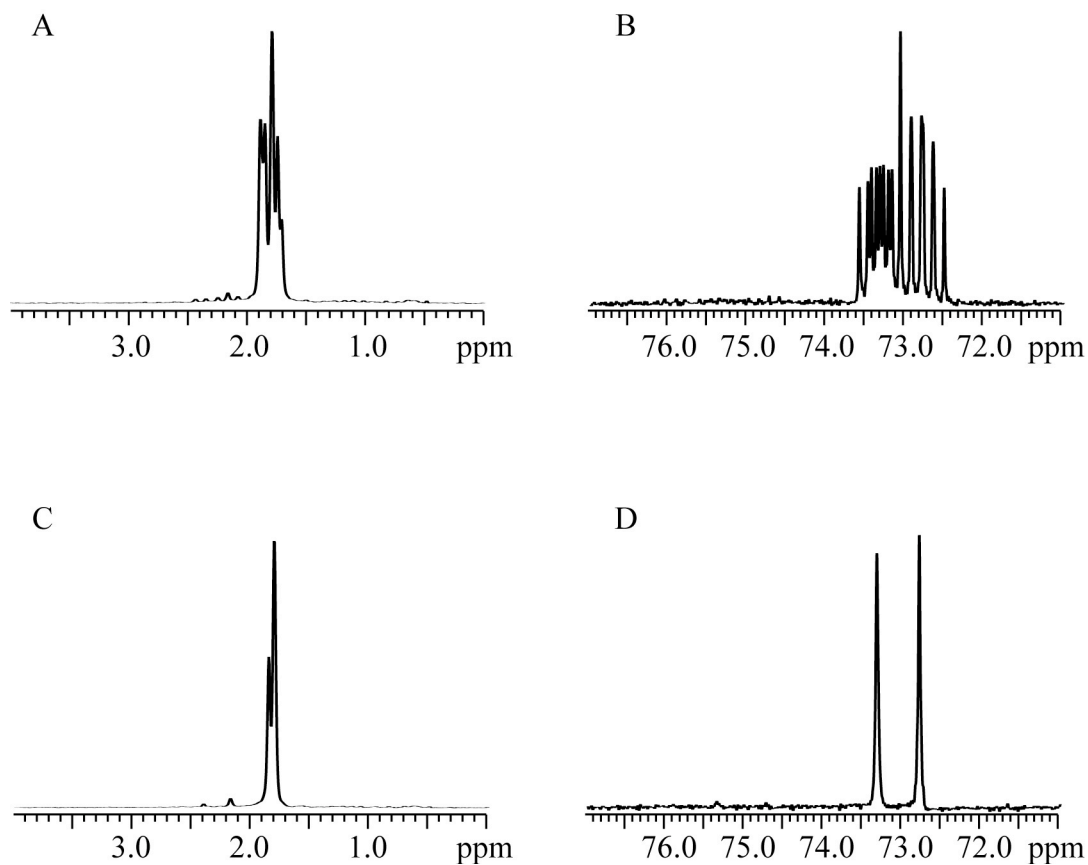

**Figure 45.** <sup>6</sup>Li and <sup>15</sup>N NMR spectra of 0.40 M [<sup>6</sup>Li, <sup>15</sup>N]LDA with 0.25 equiv **4b** in 3.0 M Me<sub>2</sub>NEt/toluene/pentane at -100 °C after aging at 0 °C for 2 hr: (A) <sup>6</sup>Li spectrum; (B) <sup>15</sup>N spectrum; (C) <sup>6</sup>Li{<sup>15</sup>N} spectrum; (D) <sup>15</sup>N{<sup>6</sup>Li} spectrum.

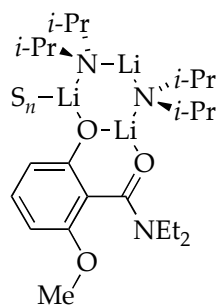

**10e**

S = Me<sub>2</sub>NEt

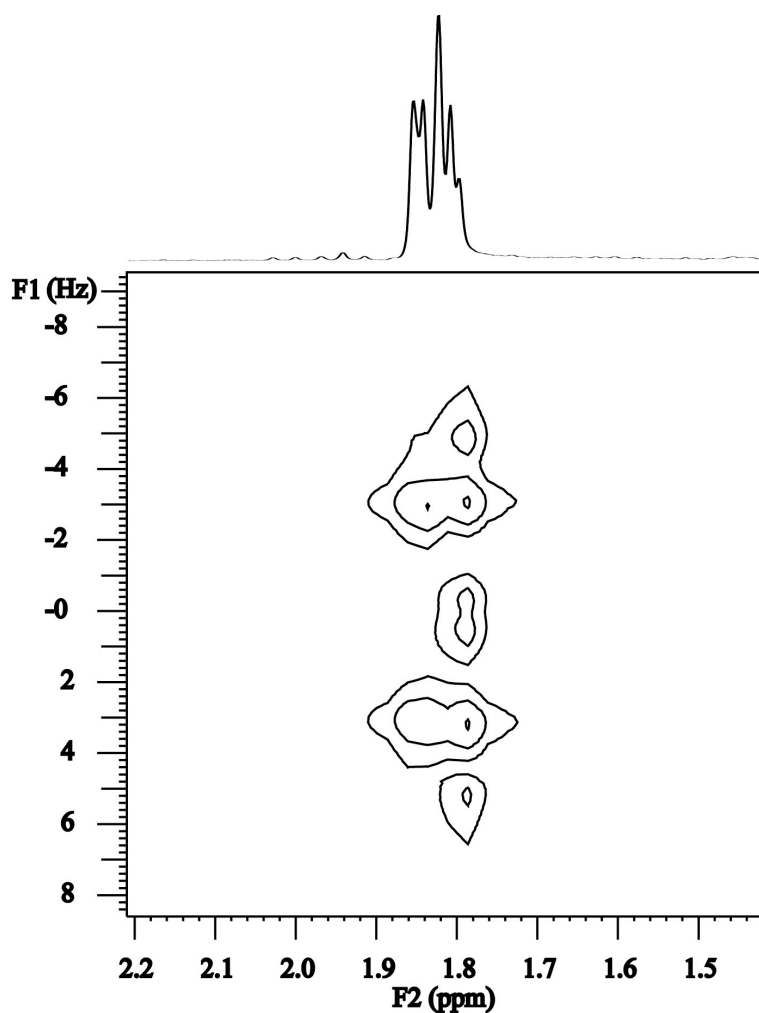

**Figure 46.**  $^1J(^6\text{Li}, ^{15}\text{N})$ -resolved NMR spectrum of 0.40 M [ $^6\text{Li}, ^{15}\text{N}$ ]LDA with 0.25 equiv of **4b** in 3.0 M Me<sub>2</sub>NEt/toluene/pentane at -100 °C after aging at 0 °C for 2 hr.

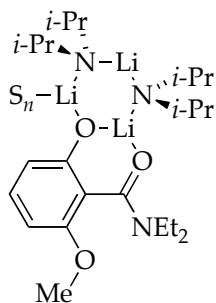

**10e**  
S = Me<sub>2</sub>NEt

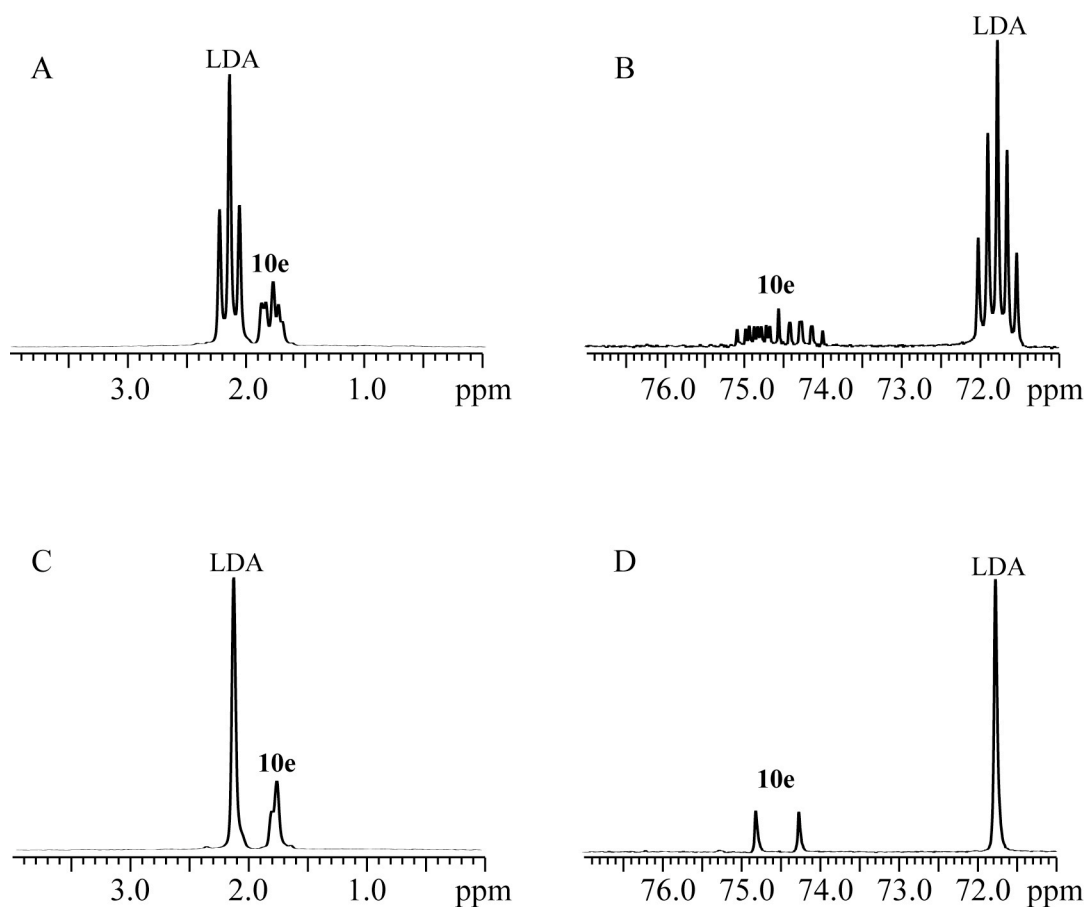

**Figure 47.** <sup>6</sup>Li and <sup>15</sup>N NMR spectra of 0.40 M [<sup>6</sup>Li, <sup>15</sup>N]LDA with 0.25 equiv **5b** in 7.7 M Me<sub>2</sub>NEt/pentane at -100 °C: (A) <sup>6</sup>Li spectrum; (B) <sup>15</sup>N spectrum; (C) <sup>6</sup>Li{<sup>15</sup>N} spectrum; (D) <sup>15</sup>N{<sup>6</sup>Li} spectrum.

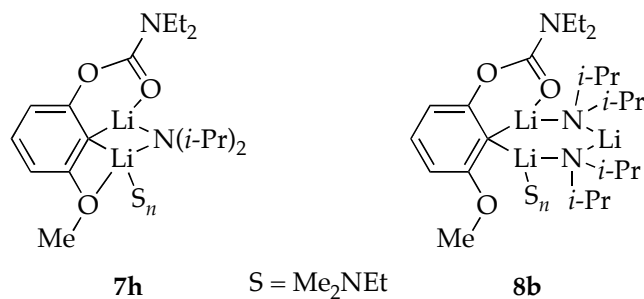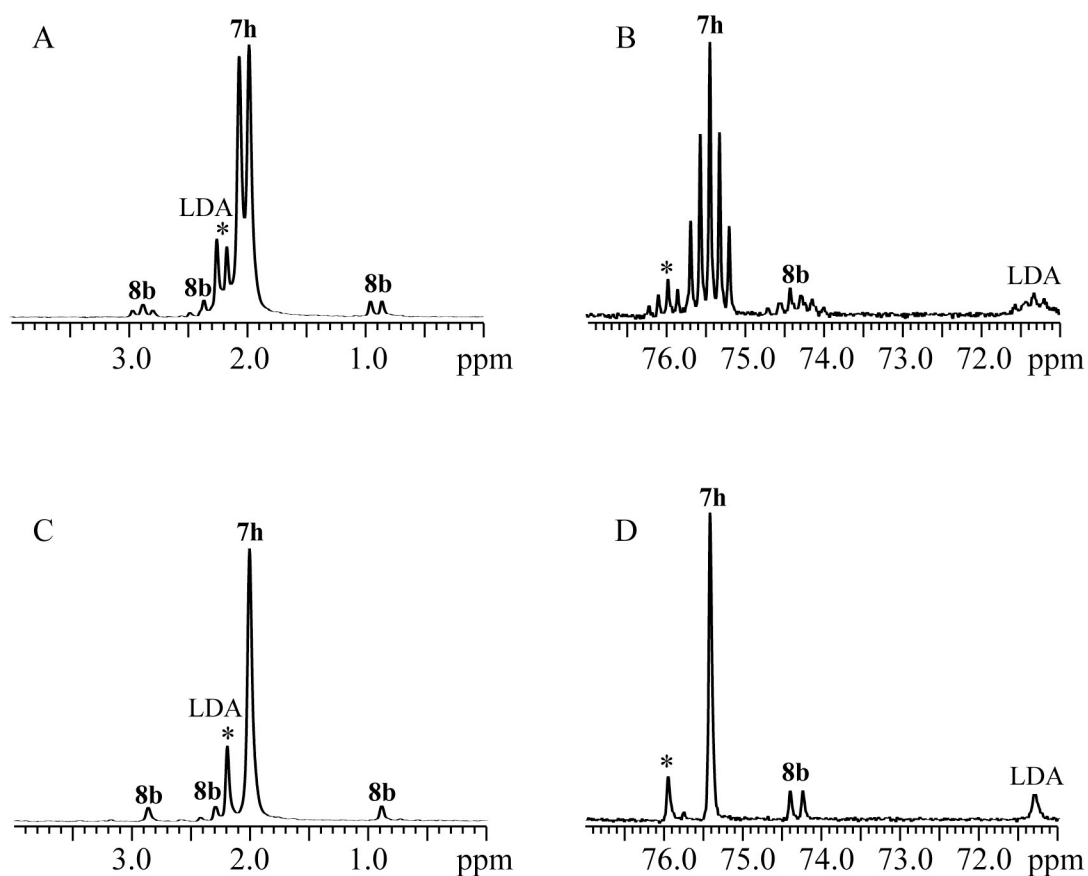

**Figure 48.**  $^6Li$  and  $^{15}N$  NMR spectra of 0.10 M [ $^6Li$ ,  $^{15}N$ ]LDA with 0.50 equiv **4b** in 7.7 M  $Me_2NEt$ /pentane at  $-100\text{ }^\circ C$ : (A)  $^6Li$  spectrum; (B)  $^{15}N$  spectrum; (C)  $^6Li\{^{15}N\}$  spectrum; (D)  $^{15}N\{^6Li\}$  spectrum. \* Unassigned  $^6Li$  doublet and  $^{15}N$  quintet.

**Table 1.**  $^6\text{Li}$  and  $^{15}\text{N}$  NMR spectroscopic data.<sup>a,b</sup>

| ArLi                    | Solvent             | R            | X   | $^6\text{Li}$ , $\delta$ (mult, $^1J_{\text{LiN}}$ ) | $^{15}\text{N}$ ,<br>$\delta$ (mult)             |
|-------------------------|---------------------|--------------|-----|------------------------------------------------------|--------------------------------------------------|
| <b>6a<sup>c</sup></b>   | THF                 | <i>i</i> -Pr | F   | 1.23 (s)                                             | --                                               |
| <b>6c<sup>b</sup></b>   | HMPA                | <i>i</i> -Pr | OMe | 0.91 (s)                                             | --                                               |
| <b>6e</b>               | HMPA                | <i>i</i> -Pr | F   | 0.75 (s)                                             | --                                               |
| <b>6f<sup>c,b</sup></b> | DME                 | <i>i</i> -Pr | F   | 1.65 (s)                                             | --                                               |
| <b>6g<sup>b</sup></b>   | TMCDA               | Et           | OMe | 2.18 (s)                                             | --                                               |
| <b>7b<sup>b</sup></b>   | THF                 | <i>i</i> -Pr | F   | 1.71 (d, 5.3)                                        | 76.3 (q)                                         |
| <b>7d<sup>b</sup></b>   | <i>n</i> -BuOMe     | Et           | OMe | 1.85 (d, 5.8)                                        | 75.8 (q)                                         |
| <b>7f<sup>b</sup></b>   | DME                 | <i>i</i> -Pr | F   | 1.60 (d, 5.4)                                        | 75.2 (q)                                         |
| <b>7g</b>               | TMEDA               | <i>i</i> -Pr | OMe | 2.01 (d, 4.9)                                        | 75.3 (q)                                         |
| <b>7h</b>               | Me <sub>2</sub> NEt | Et           | OMe | 1.93 (d, 5.2)                                        | 75.3 (q)                                         |
| <b>8a</b>               | TMEDA               | <i>i</i> -Pr | OMe | 0.78 (d, 5.7) 2.49<br>(t, 4.7) 2.50 (d,<br>5.7)      | 73.8 (tt)<br>75.3 (q)                            |
| <b>8b</b>               | Me <sub>2</sub> NEt | Et           | OMe | 0.81 (d, 6.3) 2.24<br>(d, 6.0)<br>2.80 (t, 4.9)      | 74.2 (tt)<br>74.3 (q)                            |
| <b>9a</b>               | THF                 | Me           | F   | 0.40 (d, 4.8)                                        | 79.1 (q)                                         |
| <b>9b</b>               | <i>n</i> -BuOMe     | Et           | OMe | 0.93 (d, 4.9)                                        | 75.1 (q)                                         |
| <b>9c</b>               | HMPA                | Et           | OMe | 0.54 (d, 5.3)                                        | 76.5 (q)                                         |
| <b>9d</b>               | HMPA                | Me           | F   | 0.66 (d, 4.6)                                        | 76.3 (q)                                         |
| <b>10a</b>              | <i>n</i> -BuOMe     | Et           | OMe | 1.49 (d, 5.5) 1.55<br>(d, 6.2) 1.89 (t,<br>5.2)      | 74.4 (--) <sup>d</sup><br>74.1 (--) <sup>d</sup> |
| <b>10b</b>              | HMPA                | Et           | OMe | 1.09 (d, 5.3) 1.12<br>(d, 5.3) 1.58 (t,<br>4.6)      | 73.2 (--) <sup>d</sup><br>74.7 (tt)              |
| <b>10c</b>              | DME                 | Me           | F   | 0.95 (d, 4.7) 0.98<br>(d, 5.1) 1.82 (t,<br>5.1)      | 72.9 (q)<br>74.3 (q)                             |
| <b>10d</b>              | TMEDA               | Me           | OMe | 1.21 (d, 5.0) 1.67<br>(t, 4.9)                       | 74.9 (q)<br>75.1 (q)                             |
| <b>10e</b>              | Me <sub>2</sub> NEt | Et           | OMe | 1.79 (d, 6.2) 1.79<br>(t, 5.1) 1.84 (d,<br>6.1)      | 73.8 (tt)<br>74.3 (tt)                           |

<sup>a</sup>Multiplicities are denoted as follows: s, singlet; d, doublet; t, triplet; q, quintet. The chemical shifts are reported relative to 0.30 M  $^6\text{LiCl}/\text{MeOH}$  ( $\delta$  0.0 ppm) and neat Me<sub>2</sub>NEt ( $\delta$  25.7 ppm) at -90 °C.  $^{13}\text{C}$  NMR spectra are referenced to toluene-*d*<sub>8</sub> ( $\delta$  137.9 ppm), pentane ( $\delta$  14.1 ppm), or THF ( $\delta$  67.6 ppm). Chemical shifts are reported in ppm, and *J* values are reported in Hz.

<sup>b</sup>Carbon-13 resonances of the carbanionic carbons: **6c**,  $\delta$  158.7 (br s); **6f**,  $\delta$  150.1 (br d,  $J_{\text{FC}}=120.7$ ); **6g**,  $\delta$  155.1 (t,  $J_{\text{CLi}}=7.7$ ); **7b**,  $\delta$  150.5 (br d,  $J_{\text{FC}}=123$ ); **7d**,  $\delta$  155.2 (q,  $J_{\text{CLi}}=5.7$ ); **7f**,  $\delta$  154.6 (dq,  $J_{\text{FC}}=123$ ,  $J_{\text{CLi}}=5.9$ ). <sup>c</sup>1.0 equiv [ $^6\text{Li}$ ,  $^{15}\text{N}$ ]LDA. <sup>d</sup>Obscured by another resonance.



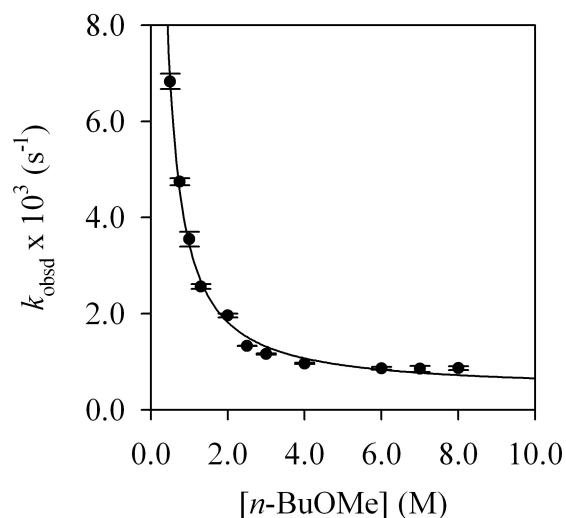

**Figure 49.** Plot of  $k_{\text{obsd}}$  versus  $[n\text{-BuOMe}]$  in pentane cosolvent for the Fries rearrangement of **7d** (0.004 M) by LDA (0.075 M) at 15 °C. The curve depicts an unweighted least-squares fit to  $k_{\text{obsd}} = k[n\text{-BuOMe}]^n + k'$  ( $k = (3.0 \pm 0.1) \times 10^{-3}$ ,  $n = -1.10 \pm 0.05$ ,  $k' = (4.1 \pm 0.1) \times 10^{-4}$ ).

| $[n\text{-BuOMe}]$ (M) | $k_{\text{obsd}} 1 \times 10^3 \text{ (s}^{-1}\text{)}$ | $k_{\text{obsd}} 2 \times 10^3 \text{ (s}^{-1}\text{)}$ | $k_{\text{obsd}} \text{ avg} \times 10^3 \text{ (s}^{-1}\text{)}$ |
|------------------------|---------------------------------------------------------|---------------------------------------------------------|-------------------------------------------------------------------|
| 0.50                   | 6.94 ± 0.05                                             | 6.71 ± 0.05                                             | 6.8 ± 0.2                                                         |
| 0.75                   | 4.79 ± 0.04                                             | 4.67 ± 0.04                                             | 4.74 ± 0.08                                                       |
| 1.0                    | 3.5 ± 0.1                                               | 3.65 ± 0.08                                             | 3.5 ± 0.2                                                         |
| 1.3                    | 2.53 ± 0.06                                             | 2.60 ± 0.06                                             | 2.56 ± 0.05                                                       |
| 2.0                    | 1.99 ± 0.04                                             | 1.93 ± 0.03                                             | 1.96 ± 0.04                                                       |
| 2.5                    | 1.33 ± 0.02                                             | 1.33 ± 0.02                                             | 1.33 ± 0.01                                                       |
| 3.0                    | 1.15 ± 0.02                                             | 1.17 ± 0.02                                             | 1.16 ± 0.02                                                       |
| 4.0                    | 0.97 ± 0.01                                             | 0.95 ± 0.01                                             | 0.96 ± 0.01                                                       |
| 6.0                    | 0.89 ± 0.02                                             | 0.84 ± 0.01                                             | 0.86 ± 0.03                                                       |
| 7.0                    | 0.80 ± 0.02                                             | 0.90 ± 0.01                                             | 0.85 ± 0.07                                                       |
| 8.0                    | 0.89 ± 0.02                                             | 0.84 ± 0.01                                             | 0.87 ± 0.04                                                       |

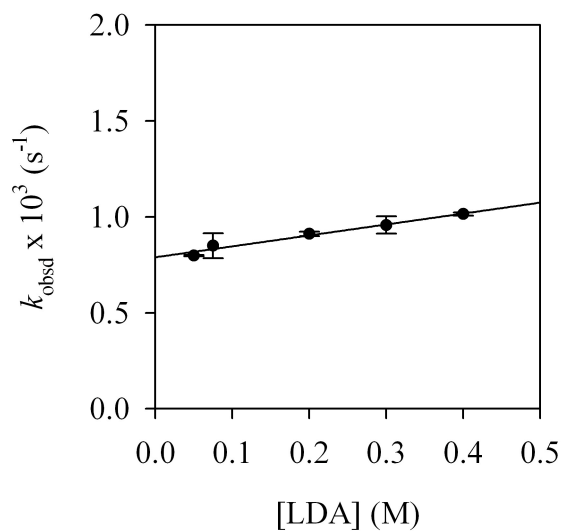

**Figure 50.** Plot of  $k_{\text{obsd}}$  versus [LDA] in 7.0 M *n*-BuOMe/pentane for the Fries rearrangement of **7d** (0.004 M) at 15 °C. The curve depicts an unweighted least-squares fit to  $k_{\text{obsd}} = k[\text{LDA}] + k'$  ( $k = (5.7 \pm 0.8) \times 10^{-4}$ ,  $k' = (7.9 \pm 0.2) \times 10^{-4}$ ).

| [LDA] (M) | $k_{\text{obsd}} 1 \times 10^3 \text{ (s}^{-1}\text{)}$ | $k_{\text{obsd}} 2 \times 10^3 \text{ (s}^{-1}\text{)}$ | $k_{\text{obsd}} \text{ avg} \times 10^3 \text{ (s}^{-1}\text{)}$ |
|-----------|---------------------------------------------------------|---------------------------------------------------------|-------------------------------------------------------------------|
| 0.050     | 0.80 ± 0.01                                             | 0.80 ± 0.01                                             | 0.80 ± 0.01                                                       |
| 0.075     | 0.80 ± 0.02                                             | 0.90 ± 0.01                                             | 0.85 ± 0.07                                                       |
| 0.20      | 0.92 ± 0.01                                             | 0.90 ± 0.01                                             | 0.91 ± 0.01                                                       |
| 0.30      | 0.93 ± 0.01                                             | 0.99 ± 0.02                                             | 0.96 ± 0.05                                                       |
| 0.40      | 1.01 ± 0.01                                             | 1.02 ± 0.02                                             | 1.01 ± 0.01                                                       |

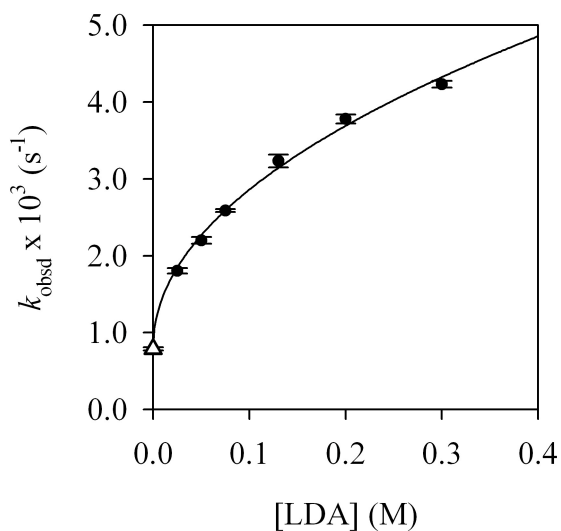

**Figure 51.** Plot of  $k_{\text{obsd}}$  versus [LDA] in 1.3 M *n*-BuOMe/pentane for the Fries rearrangement of **7d** (0.004 M) at 15 °C. The curve depicts an unweighted least-squares fit to  $k_{\text{obsd}} = k[\text{LDA}]^n + k'$  ( $k = (6.3 \pm 0.2) \times 10^{-3}$ ,  $n = 0.49 \pm 0.09$ ,  $k' = (7.9 \pm 0.2) \times 10^{-4}$ ).  $k'$  (see  $\Delta$ ) was set to equal  $k'$  in Figure 50.

| [LDA] (M) | $k_{\text{obsd}} 1 \times 10^3 \text{ (s}^{-1}\text{)}$ | $k_{\text{obsd}} 2 \times 10^3 \text{ (s}^{-1}\text{)}$ | $k_{\text{obsd}} \text{ avg} \times 10^3 \text{ (s}^{-1}\text{)}$ |
|-----------|---------------------------------------------------------|---------------------------------------------------------|-------------------------------------------------------------------|
| 0.025     | 1.83 ± 0.06                                             | 1.78 ± 0.04                                             | 1.80 ± 0.04                                                       |
| 0.050     | 2.23 ± 0.07                                             | 2.17 ± 0.05                                             | 2.20 ± 0.04                                                       |
| 0.075     | 2.53 ± 0.06                                             | 2.60 ± 0.06                                             | 2.56 ± 0.05                                                       |
| 0.13      | 3.29 ± 0.03                                             | 3.17 ± 0.02                                             | 3.23 ± 0.08                                                       |
| 0.20      | 3.82 ± 0.04                                             | 3.74 ± 0.03                                             | 3.78 ± 0.06                                                       |
| 0.30      | 4.26 ± 0.04                                             | 4.20 ± 0.03                                             | 4.23 ± 0.05                                                       |

**Table 2.** Data from Figures 49, 50, and 51 fit to  $[7\mathbf{d}] = \{(\alpha-1)k_{\text{obsd}}t + [7\mathbf{d}]_0^{-(1-\alpha)}\}^{-1/(\alpha-1)}$  to determine the order of the decay. The adjustable parameter  $\alpha$  corresponds to the reaction order in  $7\mathbf{d}$ .<sup>1</sup>

| [ <i>n</i> -BuOMe] (M) | [LDA] (M) | $\alpha$ 1  | $\alpha$ 2   |
|------------------------|-----------|-------------|--------------|
| 0.50                   | 0.075     | 1.15 ± 0.01 | 1.01 ± 0.02  |
| 0.75                   | 0.075     | 0.99 ± 0.03 | 0.99 ± 0.01  |
| 1.0                    | 0.075     | 0.99 ± 0.12 | 1.05 ± 0.03  |
| 1.3                    | 0.075     | 0.98 ± 0.08 | 0.96 ± 0.06  |
| 2.0                    | 0.075     | 1.07 ± 0.03 | 0.99 ± 0.03  |
| 2.5                    | 0.075     | 1.00 ± 0.05 | 1.06 ± 0.02  |
| 3.0                    | 0.075     | 0.99 ± 0.07 | 0.91 ± 0.02  |
| 4.0                    | 0.075     | 0.98 ± 0.06 | 0.98 ± 0.03  |
| 6.0                    | 0.075     | 1.09 ± 0.02 | 1.01 ± 0.01  |
| 7.0                    | 0.075     | 1.01 ± 0.02 | 0.94 ± 0.09  |
| 8.0                    | 0.075     | 1.01 ± 0.03 | 1.02 ± 0.01  |
| 7.0                    | 0.050     | 0.97 ± 0.06 | 1.04 ± 0.01  |
| 7.0                    | 0.20      | 1.00 ± 0.03 | 0.97 ± 0.06  |
| 7.0                    | 0.30      | 0.91 ± 0.02 | 1.01 ± 0.06  |
| 7.0                    | 0.40      | 0.99 ± 0.01 | 0.96 ± 0.07  |
| 1.3                    | 0.025     | 0.95 ± 0.09 | 0.95 ± 0.09  |
| 1.3                    | 0.050     | 0.94 ± 0.09 | 1.040 ± 0.04 |
| 1.3                    | 0.13      | 1.03 ± 0.01 | 1.00 ± 0.01  |
| 1.3                    | 0.20      | 1.04 ± 0.01 | 1.02 ± 0.01  |
| 1.3                    | 0.30      | 1.00 ± 0.04 | 1.1 ± 0.1    |

Average  $\alpha = 1.00 \pm 0.05$

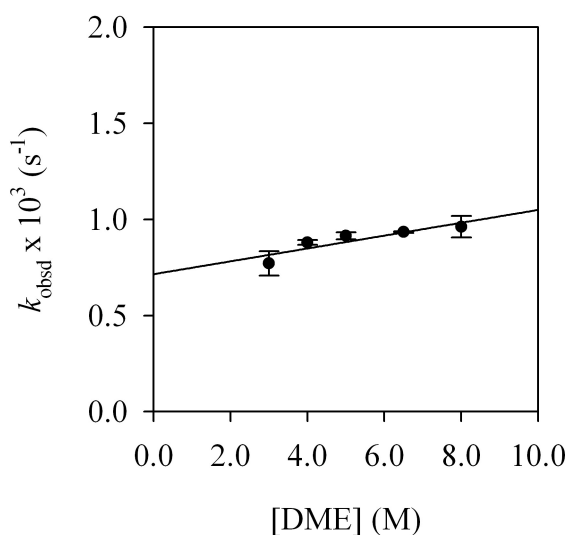

**Figure 52.** Plot of  $k_{\text{obsd}}$  versus [DME] in pentane cosolvent for the Fries rearrangement of **7e** (0.004 M) by LDA (0.40 M) at -60 °C. The curve depicts an unweighted least-squares fit to  $k_{\text{obsd}} = k[\text{DME}] + k'$  ( $k = (3.3 \pm 0.1) \times 10^{-5}$ ,  $k' = (7.1 \pm 0.5) \times 10^{-4}$ ).

| [DME] (M) | $k_{\text{obsd}} 1 \times 10^3 \text{ (s}^{-1}\text{)}$ | $k_{\text{obsd}} 2 \times 10^3 \text{ (s}^{-1}\text{)}$ | $k_{\text{obsd}} \text{ avg} \times 10^3 \text{ (s}^{-1}\text{)}$ |
|-----------|---------------------------------------------------------|---------------------------------------------------------|-------------------------------------------------------------------|
| 3.0       | 0.73 ± 0.01                                             | 0.82 ± 0.01                                             | 0.77 ± 0.03                                                       |
| 4.0       | 0.87 ± 0.01                                             | 0.89 ± 0.07                                             | 0.88 ± 0.01                                                       |
| 5.0       | 0.90 ± 0.01                                             | 0.93 ± 0.01                                             | 0.93 ± 0.02                                                       |
| 6.5       | 0.94 ± 0.01                                             | 0.93 ± 0.01                                             | 0.93 ± 0.01                                                       |
| 8.0       | 0.96 ± 0.01                                             | 0.97 ± 0.01                                             | 0.96 ± 0.06                                                       |

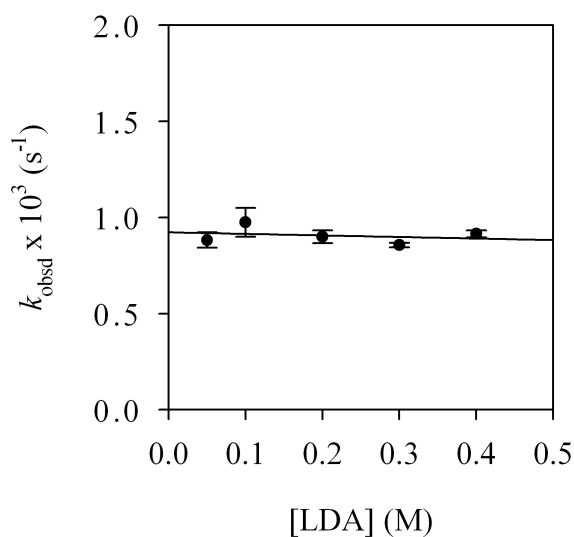

**Figure 53.** Plot of  $k_{\text{obsd}}$  versus [LDA] in 5.0 M DME/pentane for the Fries rearrangement of **7e** (0.004 M) at  $-60\text{ }^{\circ}\text{C}$ . The curve depicts an unweighted least-squares fit to  $k_{\text{obsd}} = k[\text{LDA}] + k'$  ( $k = (-8.1 \pm 17.2) \times 10^{-5}$ ,  $k' = (9.2 \pm 0.4) \times 10^{-4}$ ).

| [LDA] (M) | $k_{\text{obsd}} 1 \times 10^3 \text{ (s}^{-1}\text{)}$ | $k_{\text{obsd}} 2 \times 10^3 \text{ (s}^{-1}\text{)}$ | $k_{\text{obsd}} \text{ avg} \times 10^3 \text{ (s}^{-1}\text{)}$ |
|-----------|---------------------------------------------------------|---------------------------------------------------------|-------------------------------------------------------------------|
| 0.05      | $0.85 \pm 0.01$                                         | $0.91 \pm 0.01$                                         | $0.88 \pm 0.04$                                                   |
| 0.10      | $0.92 \pm 0.01$                                         | $1.03 \pm 0.01$                                         | $0.97 \pm 0.08$                                                   |
| 0.20      | $0.88 \pm 0.01$                                         | $0.92 \pm 0.01$                                         | $0.90 \pm 0.03$                                                   |
| 0.30      | $0.86 \pm 0.01$                                         | $0.85 \pm 0.01$                                         | $0.86 \pm 0.01$                                                   |
| 0.40      | $0.90 \pm 0.01$                                         | $0.93 \pm 0.01$                                         | $0.93 \pm 0.02$                                                   |

**Table 3.** Data from Figures 52 and 53 fit to  $[7e] = \{(\alpha-1)k_{\text{obsd}} t + [7e]_0^{-(1-\alpha)}\}^{-1/(\alpha-1)}$  to determine the order of the decay. The adjustable parameter  $\alpha$  corresponds to the reaction order in **7e**.<sup>1</sup>

| [DME] (M) | [LDA] (M) | $\alpha$ 1      | $\alpha$ 2      |
|-----------|-----------|-----------------|-----------------|
| 3.0       | 0.40      | $1.00 \pm 0.04$ | $1.1 \pm 0.1$   |
| 4.0       | 0.40      | $1.01 \pm 0.03$ | $1.00 \pm 0.02$ |
| 5.0       | 0.40      | $1.00 \pm 0.04$ | $1.04 \pm 0.01$ |
| 6.5       | 0.40      | $0.96 \pm 0.08$ | $1.00 \pm 0.02$ |
| 8.0       | 0.40      | $1.01 \pm 0.02$ | $0.95 \pm 0.09$ |
| 5.0       | 0.05      | $0.99 \pm 0.03$ | $1.00 \pm 0.02$ |
| 5.0       | 0.10      | $1.02 \pm 0.05$ | $1.03 \pm 0.04$ |
| 5.0       | 0.20      | $1.01 \pm 0.03$ | $0.97 \pm 0.06$ |
| 5.0       | 0.30      | $1.02 \pm 0.05$ | $1.02 \pm 0.03$ |

Average  $\alpha = 1.01 \pm 0.03$

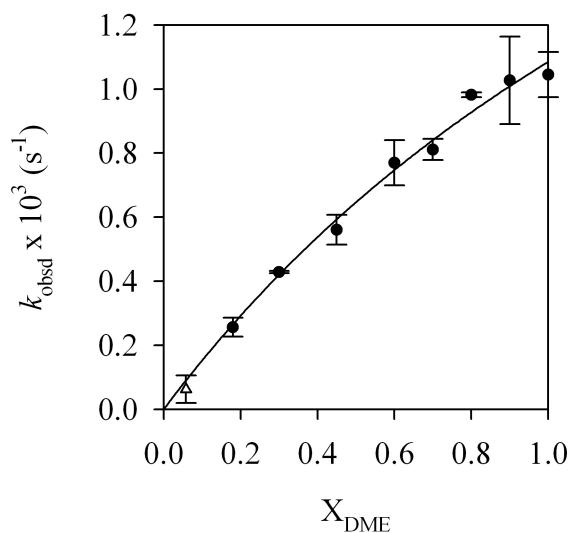

**Figure 54.** Plot of  $k_{\text{obsd}}$  versus mole fraction of DME ( $X_{\text{DME}}$ ) for the rearrangement of **7e** (0.004 M) by LDA (0.05 M) at  $-60\text{ }^{\circ}\text{C}$ . The donor solvent concentration is held constant ( $[\text{DME}] + [n\text{-BuOMe}] = 5.0\text{ M}$ ) using pentane as cosolvent. The curve depicts an unweighted least-squares fit to  $k_{\text{obsd}} = (a + bx)/(1 + cx)$  ( $a = (0.0 \pm 0.1) \times 10^{-3}$ ,  $b = 1.6 \pm 0.5$ ,  $c = 0.5 \pm 0.4$ ) such that  $1 + c = K_{\text{eq}}^2$ . At low DME concentrations the lithium phenolate precipitated during the reaction; the value of  $k_{\text{obsd}}$  (shown as  $\Delta$ ) was not included in the fit.

| $X_{\text{DME}}$ | $k_{\text{obsd}} 1 \times 10^3 (\text{s}^{-1})$ | $k_{\text{obsd}} 2 \times 10^3 (\text{s}^{-1})$ | $k_{\text{obsd}} \text{ avg} \times 10^3 (\text{s}^{-1})$ |
|------------------|-------------------------------------------------|-------------------------------------------------|-----------------------------------------------------------|
| 0.06             | $0.09 \pm 0.01$                                 | $0.03 \pm 0.01$                                 | $0.06 \pm 0.04$                                           |
| 0.18             | $0.28 \pm 0.01$                                 | $0.24 \pm 0.01$                                 | $0.26 \pm 0.03$                                           |
| 0.30             | $0.43 \pm 0.01$                                 | $0.42 \pm 0.01$                                 | $0.43 \pm 0.01$                                           |
| 0.45             | $0.53 \pm 0.01$                                 | $0.59 \pm 0.01$                                 | $0.56 \pm 0.04$                                           |
| 0.60             | $0.72 \pm 0.01$                                 | $0.82 \pm 0.01$                                 | $0.77 \pm 0.07$                                           |
| 0.70             | $0.83 \pm 0.02$                                 | $0.79 \pm 0.01$                                 | $0.81 \pm 0.03$                                           |
| 0.80             | $0.98 \pm 0.01$                                 | $0.99 \pm 0.01$                                 | $0.99 \pm 0.01$                                           |
| 0.90             | $1.12 \pm 0.01$                                 | $0.93 \pm 0.01$                                 | $1.03 \pm 0.13$                                           |
| 1.0              | $1.10 \pm 0.01$                                 | $0.99 \pm 0.01$                                 | $1.05 \pm 0.08$                                           |



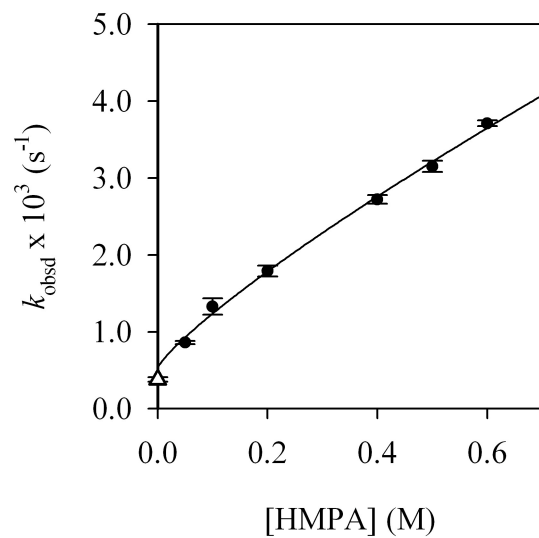

**Figure 55.** Plot of  $k_{\text{obsd}}$  versus [HMPA] in 10.0 M THF/hexanes cosolvent for the Fries rearrangement of **6b** (0.004 M) by LDA (0.10 M) at  $-65\text{ }^{\circ}\text{C}$ . The curve depicts an unweighted least-squares fit to  $k_{\text{obsd}} = k[\text{HMPA}]^n + k'$  ( $k = (4.8 \pm 0.2) \times 10^{-3}$ ,  $n = 0.8 \pm 0.1$ ,  $k' = (0.5 \pm 0.2) \times 10^{-3}$ ). Pseudo-first-order conditions not maintained at 0.05 M HMPA ( $\Delta$ ); data was omitted from the fit.

| [HMPA] (M) | $k_{\text{obsd}} 1 \times 10^3 (\text{s}^{-1})$ | $k_{\text{obsd}} 2 \times 10^3 (\text{s}^{-1})$ | $k_{\text{obsd}} \text{ avg} \times 10^3 (\text{s}^{-1})$ |
|------------|-------------------------------------------------|-------------------------------------------------|-----------------------------------------------------------|
| 0.0        | $0.40 \pm 0.03$                                 | $0.36 \pm 0.02$                                 | $0.38 \pm 0.03$                                           |
| 0.05       | $0.87 \pm 0.03$                                 | $0.84 \pm 0.02$                                 | $0.86 \pm 0.02$                                           |
| 0.10       | $1.25 \pm 0.02$                                 | $1.40 \pm 0.04$                                 | $1.3 \pm 0.1$                                             |
| 0.20       | $1.74 \pm 0.01$                                 | $1.84 \pm 0.02$                                 | $1.79 \pm 0.07$                                           |
| 0.40       | $2.76 \pm 0.01$                                 | $2.68 \pm 0.02$                                 | $2.72 \pm 0.06$                                           |
| 0.50       | $3.10 \pm 0.02$                                 | $3.20 \pm 0.05$                                 | $3.15 \pm 0.07$                                           |
| 0.60       | $3.68 \pm 0.05$                                 | $3.73 \pm 0.01$                                 | $3.71 \pm 0.04$                                           |

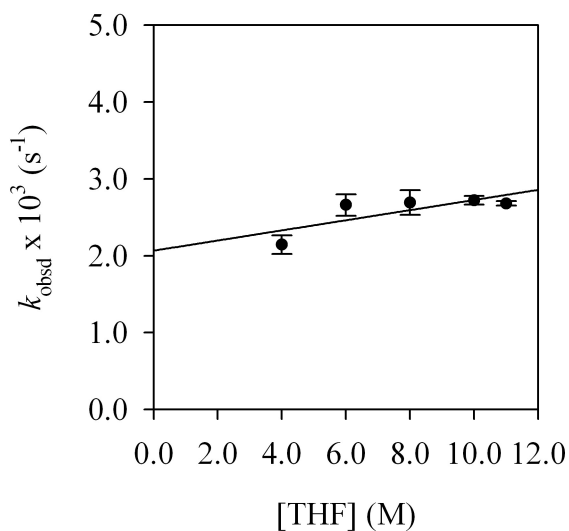

**Figure 56.** Plot of  $k_{\text{obsd}}$  versus [THF] in 0.40 M HMPA/hexanes cosolvent for the Fries rearrangement of **6b** (0.004 M) by LDA (0.10 M) at -65 °C. The curve depicts an unweighted least-squares fit to  $k_{\text{obsd}} = k[\text{HMPA}] + k'$  ( $k = (7 \pm 3) \times 10^{-5}$ ,  $k' = (2.1 \pm 0.3) \times 10^{-3}$ ).

| [THF] (M) | $k_{\text{obsd}} 1 \times 10^3 \text{ (s}^{-1}\text{)}$ | $k_{\text{obsd}} 2 \times 10^3 \text{ (s}^{-1}\text{)}$ | $k_{\text{obsd}} \text{ avg} \times 10^3 \text{ (s}^{-1}\text{)}$ |
|-----------|---------------------------------------------------------|---------------------------------------------------------|-------------------------------------------------------------------|
| 4.0       | 2.06 ± 0.02                                             | 2.23 ± 0.04                                             | 2.1 ± 0.1                                                         |
| 6.0       | 2.76 ± 0.01                                             | 2.56 ± 0.01                                             | 2.7 ± 0.1                                                         |
| 8.0       | 2.80 ± 0.01                                             | 2.58 ± 0.01                                             | 2.7 ± 0.2                                                         |
| 10.0      | 2.76 ± 0.02                                             | 2.68 ± 0.01                                             | 2.72 ± 0.06                                                       |
| 11.0      | 2.66 ± 0.02                                             | 2.70 ± 0.02                                             | 2.68 ± 0.03                                                       |

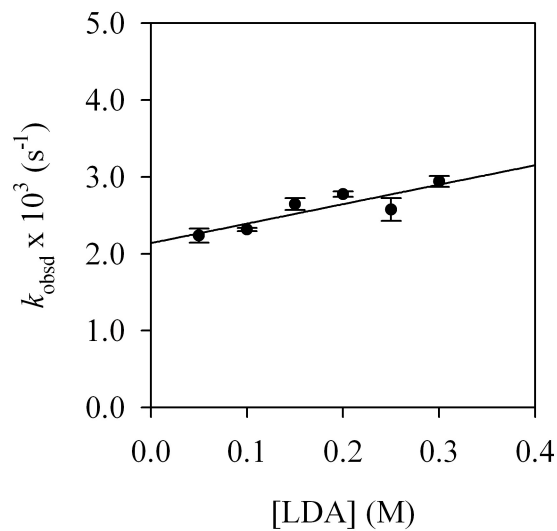

**Figure 57.** Plot of  $k_{\text{obsd}}$  versus [LDA] in 0.40 M HMPA/10.0 M THF/hexanes for the Fries rearrangement of **6b** (0.004 M) at -65 °C. The curve depicts an unweighted least-squares fit to  $k_{\text{obsd}} = k[\text{LDA}] + k'$  ( $k = (2.5 \pm 0.7) \times 10^{-3}$ ,  $k' = (2.1 \pm 0.1) \times 10^{-3}$ ).

| [LDA] (M) | $k_{\text{obsd}} 1 \times 10^3 \text{ (s}^{-1}\text{)}$ | $k_{\text{obsd}} 2 \times 10^3 \text{ (s}^{-1}\text{)}$ | $k_{\text{obsd}} \text{ avg} \times 10^3 \text{ (s}^{-1}\text{)}$ |
|-----------|---------------------------------------------------------|---------------------------------------------------------|-------------------------------------------------------------------|
| 0.05      | 2.17 ± 0.01                                             | 2.33 ± 0.02                                             | 2.24 ± 0.09                                                       |
| 0.10      | 2.33 ± 0.04                                             | 2.30 ± 0.02                                             | 2.32 ± 0.02                                                       |
| 0.15      | 2.59 ± 0.01                                             | 2.71 ± 0.01                                             | 2.65 ± 0.08                                                       |
| 0.20      | 2.75 ± 0.01                                             | 2.80 ± 0.03                                             | 2.78 ± 0.04                                                       |
| 0.25      | 2.47 ± 0.01                                             | 2.68 ± 0.05                                             | 2.6 ± 0.1                                                         |
| 0.30      | 2.89 ± 0.02                                             | 2.99 ± 0.01                                             | 2.94 ± 0.07                                                       |

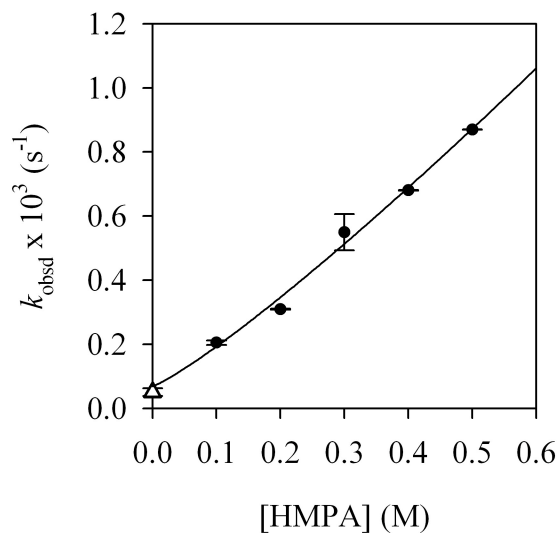

**Figure 58.** Plot of  $k_{\text{obsd}}$  versus [HMPA] in 10.0 M THF/hexanes cosolvent for the Fries rearrangement of **6d** (0.004 M) by LDA (0.10 M) at  $-78\text{ }^{\circ}\text{C}$ . The curve depicts an unweighted least-squares fit to  $k_{\text{obsd}} = k[\text{HMPA}]^n + k'$  ( $k = (1.8 \pm 0.3) \times 10^{-3}$ ,  $n = 1.2 \pm 0.3$ ,  $k' = (0.7 \pm 10) \times 10^{-4}$ ). Pseudo-first-order conditions not maintained at 0.05 M HMPA ( $\Delta$ ); data was omitted from the fit.

| [HMPA] (M) | $k_{\text{obsd } 1 \times 10^3} (\text{s}^{-1})$ | $k_{\text{obsd } 2 \times 10^3} (\text{s}^{-1})$ | $k_{\text{obsd } \text{avg}} \times 10^3 (\text{s}^{-1})$ |
|------------|--------------------------------------------------|--------------------------------------------------|-----------------------------------------------------------|
| 0.0        | $0.04 \pm 0.01$                                  | $0.06 \pm 0.01$                                  | $0.05 \pm 0.01$                                           |
| 0.10       | $0.21 \pm 0.01$                                  | $0.21 \pm 0.01$                                  | $0.21 \pm 0.01$                                           |
| 0.20       | $0.31 \pm 0.01$                                  | $0.31 \pm 0.01$                                  | $0.31 \pm 0.01$                                           |
| 0.30       | $0.51 \pm 0.01$                                  | $0.59 \pm 0.01$                                  | $0.55 \pm 0.06$                                           |
| 0.40       | $0.68 \pm 0.01$                                  | $0.68 \pm 0.01$                                  | $0.68 \pm 0.01$                                           |
| 0.50       | $0.87 \pm 0.01$                                  | $0.87 \pm 0.01$                                  | $0.87 \pm 0.01$                                           |

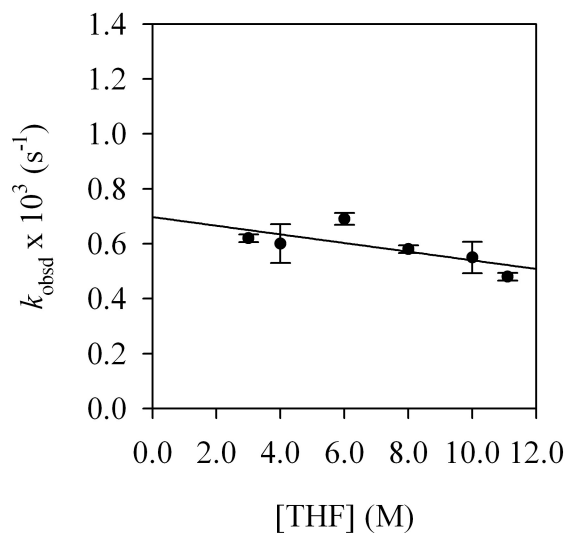

**Figure 59.** Plot of  $k_{\text{obsd}}$  versus [THF] in 0.40 M HMPA/hexanes cosolvent for the Fries rearrangement of **6d** (0.004 M) by LDA (0.10 M) at -78 °C. The curve depicts an unweighted least-squares fit to  $k_{\text{obsd}} = k[\text{HMPA}] + k'$  ( $k = (-1.6 \pm 0.7) \times 10^{-5}$ ,  $k' = (0.70 \pm 0.06) \times 10^{-3}$ ).

| [LDA] (M) | $k_{\text{obsd}} 1 \times 10^3 \text{ (s}^{-1}\text{)}$ | $k_{\text{obsd}} 2 \times 10^3 \text{ (s}^{-1}\text{)}$ | $k_{\text{obsd}} \text{ avg} \times 10^3 \text{ (s}^{-1}\text{)}$ |
|-----------|---------------------------------------------------------|---------------------------------------------------------|-------------------------------------------------------------------|
| 3.0       | 0.61 ± 0.01                                             | 0.63 ± 0.01                                             | 0.62 ± 0.01                                                       |
| 4.0       | 0.55 ± 0.02                                             | 0.65 ± 0.01                                             | 0.60 ± 0.07                                                       |
| 6.0       | 0.70 ± 0.01                                             | 0.67 ± 0.01                                             | 0.69 ± 0.02                                                       |
| 8.0       | 0.59 ± 0.01                                             | 0.57 ± 0.01                                             | 0.58 ± 0.01                                                       |
| 10.0      | 0.51 ± 0.01                                             | 0.59 ± 0.01                                             | 0.55 ± 0.06                                                       |
| 11.1      | 0.47 ± 0.02                                             | 0.49 ± 0.01                                             | 0.48 ± 0.01                                                       |

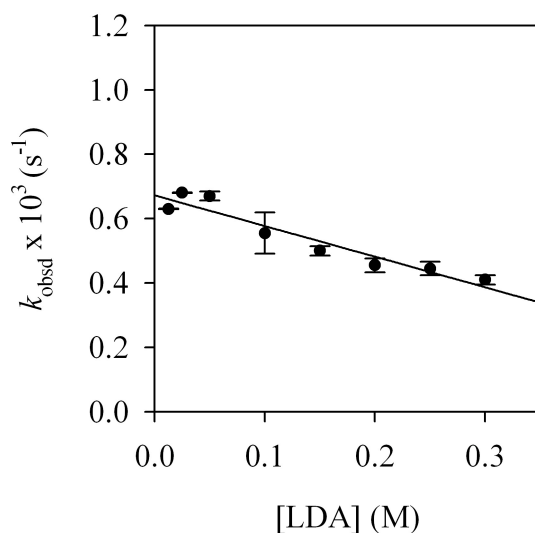

**Figure 60.** Plot of  $k_{\text{obsd}}$  versus [LDA] in 0.40 M HMPA / 10.0 M THF / hexanes for the Fries rearrangement of **6d** (0.004 M) at -78 °C. The curve depicts an unweighted least-squares fit to  $k_{\text{obsd}} = k[\text{LDA}] + k'$  ( $k = (-0.9 \pm 0.1) \times 10^{-3}$ ,  $k' = (0.67 \pm 0.02) \times 10^{-3}$ ).

| [LDA] (M) | $k_{\text{obsd}} 1 \times 10^3 \text{ (s}^{-1}\text{)}$ | $k_{\text{obsd}} 2 \times 10^3 \text{ (s}^{-1}\text{)}$ | $k_{\text{obsd}} \text{ avg} \times 10^3 \text{ (s}^{-1}\text{)}$ |
|-----------|---------------------------------------------------------|---------------------------------------------------------|-------------------------------------------------------------------|
| 0.013     | 0.63 ± 0.01                                             | 0.63 ± 0.01                                             | 0.63 ± 0.01                                                       |
| 0.025     | 0.68 ± 0.01                                             | 0.68 ± 0.01                                             | 0.68 ± 0.01                                                       |
| 0.050     | 0.66 ± 0.01                                             | 0.68 ± 0.01                                             | 0.67 ± 0.01                                                       |
| 0.10      | 0.60 ± 0.01                                             | 0.51 ± 0.01                                             | 0.56 ± 0.06                                                       |
| 0.15      | 0.49 ± 0.01                                             | 0.51 ± 0.01                                             | 0.50 ± 0.01                                                       |
| 0.20      | 0.47 ± 0.01                                             | 0.44 ± 0.01                                             | 0.46 ± 0.02                                                       |
| 0.25      | 0.43 ± 0.01                                             | 0.46 ± 0.01                                             | 0.45 ± 0.02                                                       |
| 0.30      | 0.40 ± 0.01                                             | 0.42 ± 0.01                                             | 0.41 ± 0.01                                                       |

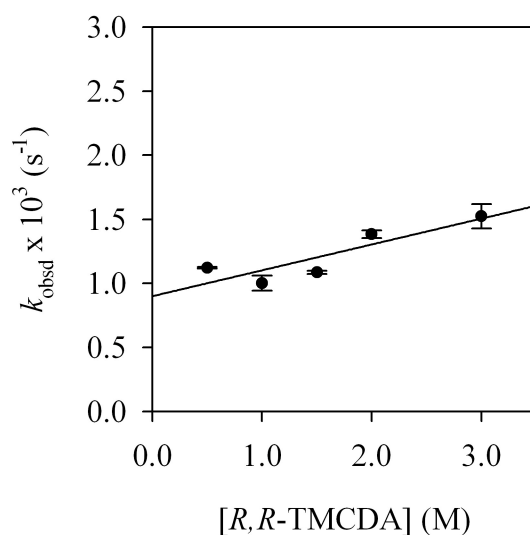

**Figure 61.** Plot of  $k_{\text{obsd}}$  versus  $[R,R\text{-TMCDA}]$  in toluene cosolvent for the Fries rearrangement of **6g** (0.004 M) by LDA (0.10 M) at  $-25\text{ }^{\circ}\text{C}$ . The curve depicts an unweighted least-squares fit to  $k_{\text{obsd}} = k[R,R\text{-TMCDA}] + k'$  ( $k = (2.0 \pm 0.4) \times 10^{-4}$ ,  $k' = (9.0 \pm 0.8) \times 10^{-4}$ ).

| $[R,R\text{-TMCDA}]$ (M) | $k_{\text{obsd } 1 \times 10^3} (\text{s}^{-1})$ | $k_{\text{obsd } 2 \times 10^3} (\text{s}^{-1})$ | $k_{\text{obsd avg}} \times 10^3 (\text{s}^{-1})$ |
|--------------------------|--------------------------------------------------|--------------------------------------------------|---------------------------------------------------|
| 0.5                      | $1.12 \pm 0.02$                                  | $1.13 \pm 0.02$                                  | $1.13 \pm 0.01$                                   |
| 1.0                      | $1.04 \pm 0.01$                                  | $0.96 \pm 0.01$                                  | $1.00 \pm 0.06$                                   |
| 1.5                      | $1.08 \pm 0.01$                                  | $1.09 \pm 0.01$                                  | $1.09 \pm 0.01$                                   |
| 2.0                      | $1.41 \pm 0.01$                                  | $1.36 \pm 0.02$                                  | $1.39 \pm 0.04$                                   |
| 3.0                      | $1.59 \pm 0.02$                                  | $1.46 \pm 0.02$                                  | $1.53 \pm 0.09$                                   |

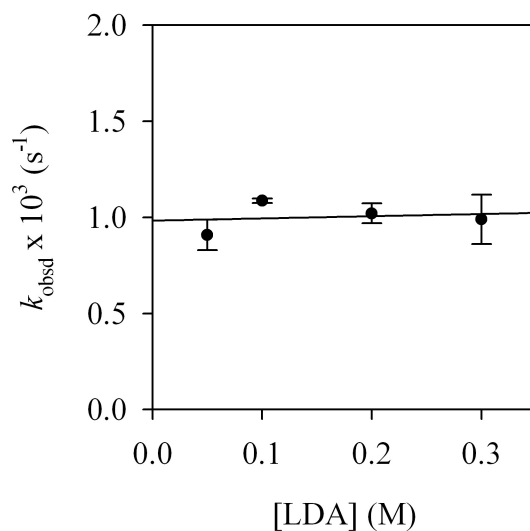

**Figure 62.** Plot of  $k_{\text{obsd}}$  versus [LDA] in 1.5 M *R,R*-TMCDA/toluene for the Fries rearrangement of **6g** (0.004 M) at -25 °C. The curve depicts an unweighted least-squares fit to  $k_{\text{obsd}} = k[\text{LDA}] + k'$  ( $k = (1 \pm 4) \times 10^{-4}$ ,  $k' = (9.8 \pm 0.7) \times 10^{-4}$ ).

| [LDA] (M) | $k_{\text{obsd } 1} \times 10^3 (\text{s}^{-1})$ | $k_{\text{obsd } 2} \times 10^3 (\text{s}^{-1})$ | $k_{\text{obsd } \text{avg}} \times 10^3 (\text{s}^{-1})$ |
|-----------|--------------------------------------------------|--------------------------------------------------|-----------------------------------------------------------|
| 0.05      | $0.96 \pm 0.01$                                  | $0.85 \pm 0.01$                                  | $0.91 \pm 0.08$                                           |
| 0.10      | $1.08 \pm 0.01$                                  | $1.09 \pm 0.01$                                  | $1.09 \pm 0.01$                                           |
| 0.20      | $1.06 \pm 0.01$                                  | $0.98 \pm 0.01$                                  | $1.02 \pm 0.06$                                           |
| 0.30      | $1.08 \pm 0.01$                                  | $0.90 \pm 0.01$                                  | $0.99 \pm 0.12$                                           |



**Table 4.** Data from Figures 61 and 62 fit to  $[6\mathbf{g}] = \{(\alpha-1)k_{\text{obsd}}t + [6\mathbf{g}]_0^{-(1-\alpha)}\}^{-1/(\alpha-1)}$  to determine the order of the decay. The adjustable parameter  $\alpha$  corresponds to the reaction order in  $6\mathbf{g}$ .<sup>1</sup>

| [R,R-TMCDA] (M) | [LDA] (M) | $\alpha$ 1  | $\alpha$ 2  |
|-----------------|-----------|-------------|-------------|
| 0.5             | 0.10      | 1.09 ± 0.02 | 1.00 ± 0.02 |
| 1.0             | 0.10      | 1.01 ± 0.01 | 0.87 ± 0.01 |
| 1.5             | 0.10      | 1.02 ± 0.01 | 1.05 ± 0.01 |
| 2.0             | 0.10      | 1.06 ± 0.01 | 1.24 ± 0.01 |
| 3.0             | 0.10      | 0.91 ± 0.01 | 0.93 ± 0.01 |
| 1.5             | 0.05      | 0.93 ± 0.01 | 1.00 ± 0.01 |
| 1.5             | 0.20      | 0.95 ± 0.01 | 0.95 ± 0.01 |
| 1.5             | 0.30      | 1.10 ± 0.02 | 0.96 ± 0.01 |

Average  $\alpha = 1.01 \pm 0.10$

**Computational Studies.** Calculations based on density functional theory (DFT) were performed at the B3LYP/6-31G(d) level of theory using Gaussian 03 and visualized with GaussView 3.09.<sup>3,4</sup> Gibbs free energies ( $\Delta G^\circ$ , kcal/mol) include thermal corrections at 298 K. Calculated transition structures were shown to be legitimate saddle points by the existence of a single imaginary frequency. The alkyl groups on the carbamate were modeled as methyl groups and LDA was modeled as lithium dimethylamide. THF and *n*-BuOMe were modeled as dimethylether. TMCDA was modeled as TMEDA. The following equilibrium equations have been balanced, so the energies can be compared.

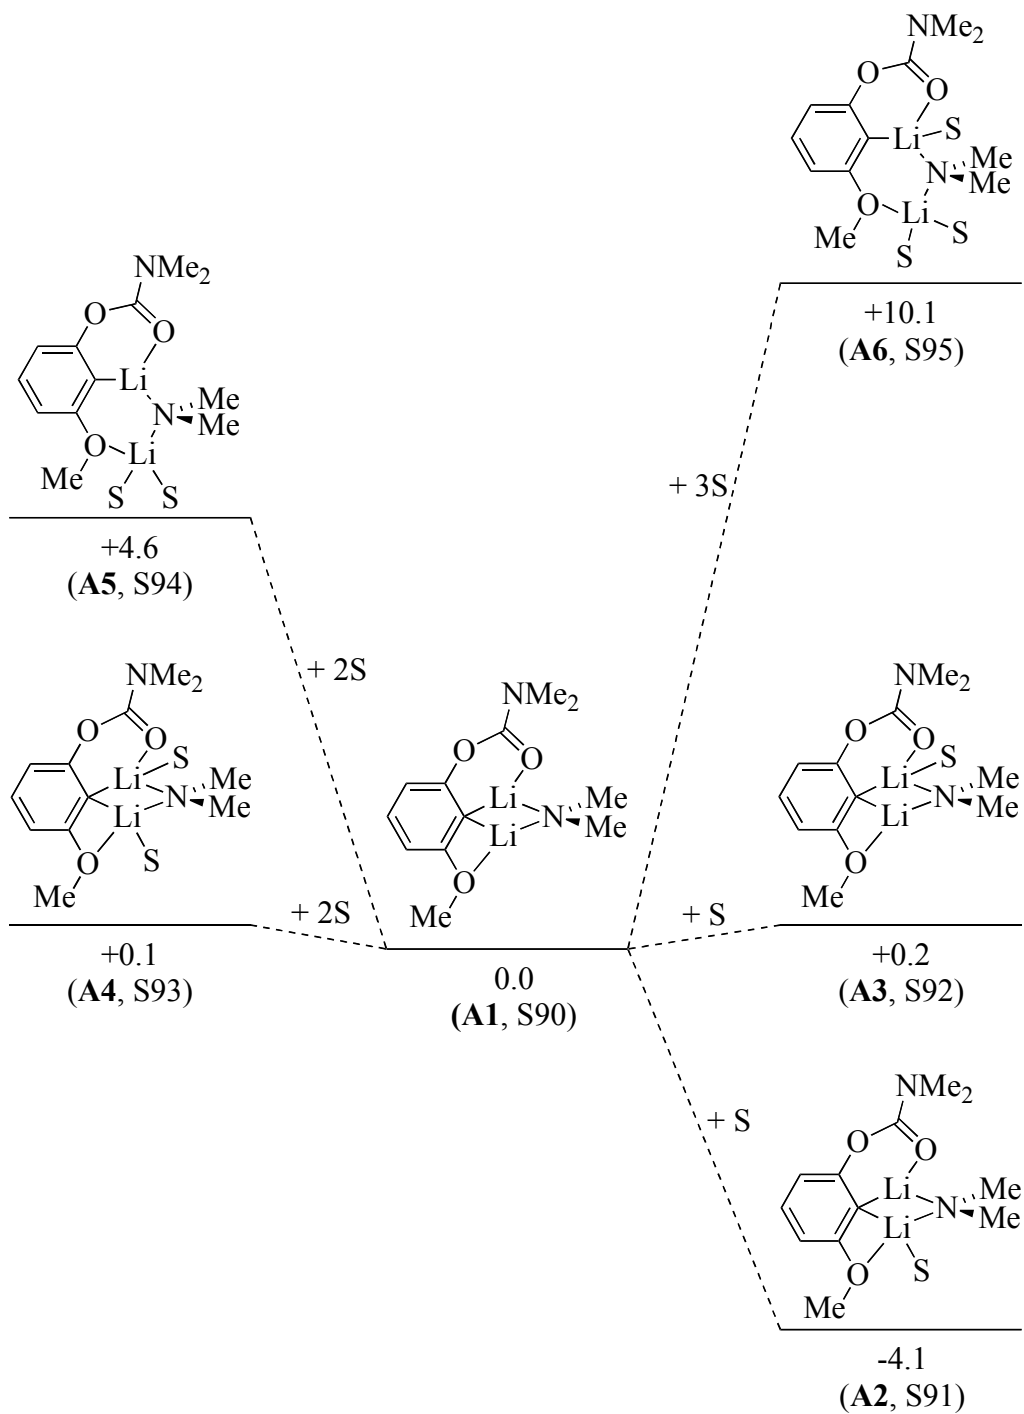

**Figure 63.** Relative free energies ( $\Delta G^\circ$ , kcal/mol). S = Me<sub>2</sub>O

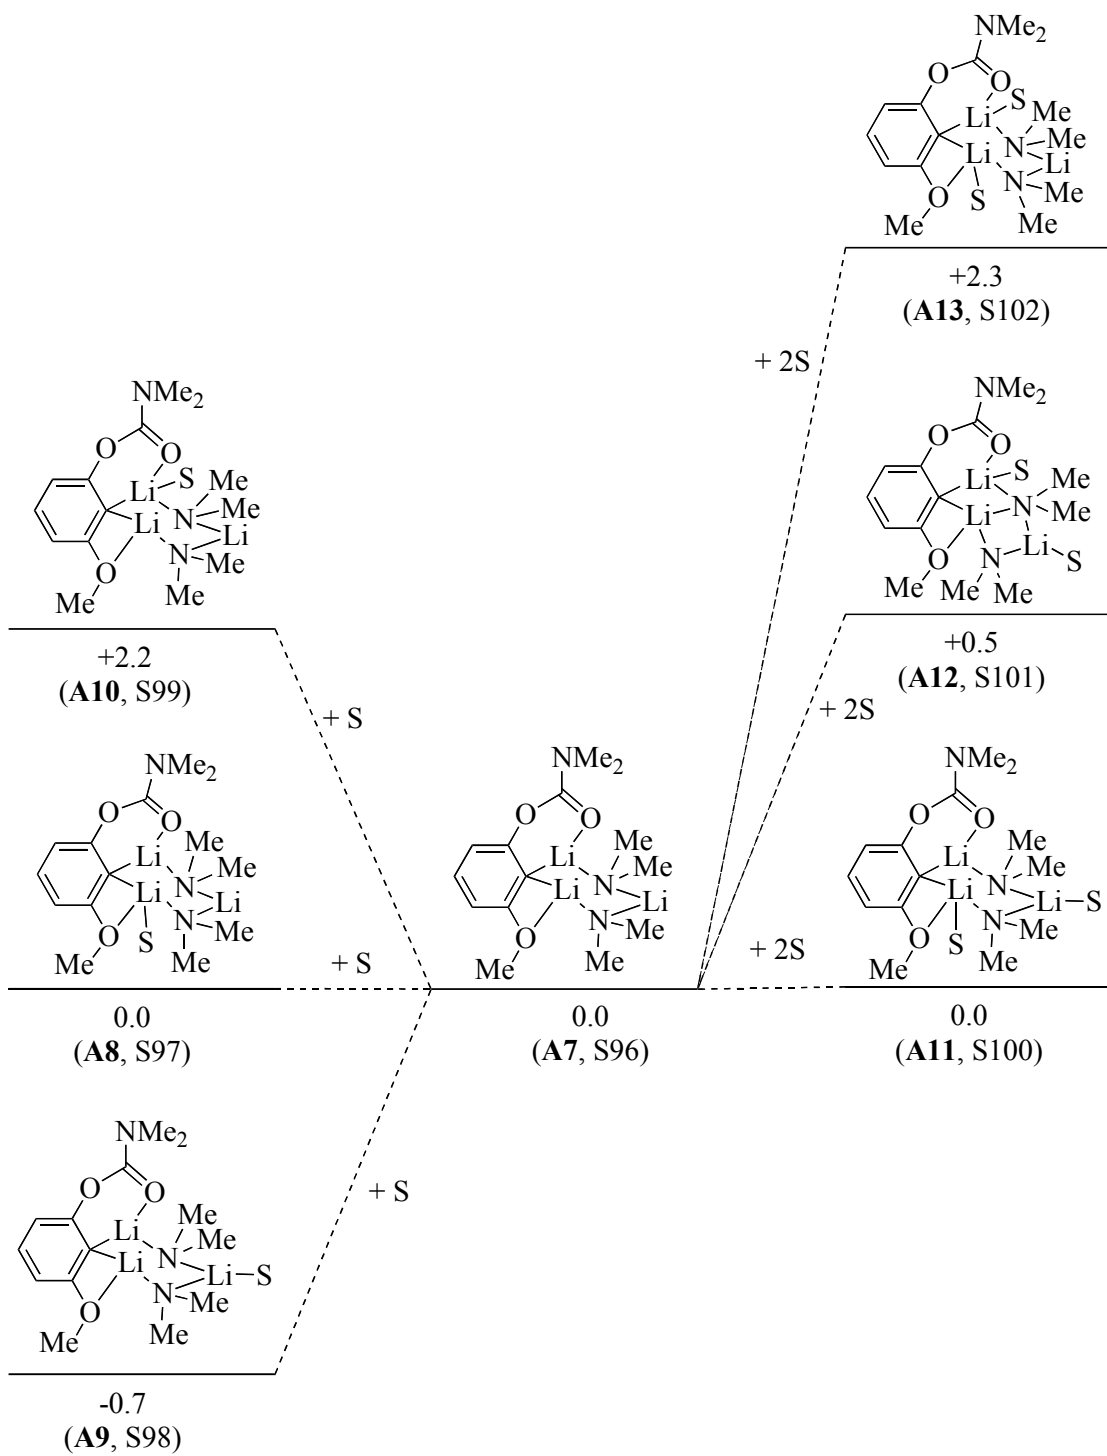

**Figure 64.** Relative free energies ( $\Delta G^\circ$ , kcal/mol). S =  $\text{Me}_2\text{O}$

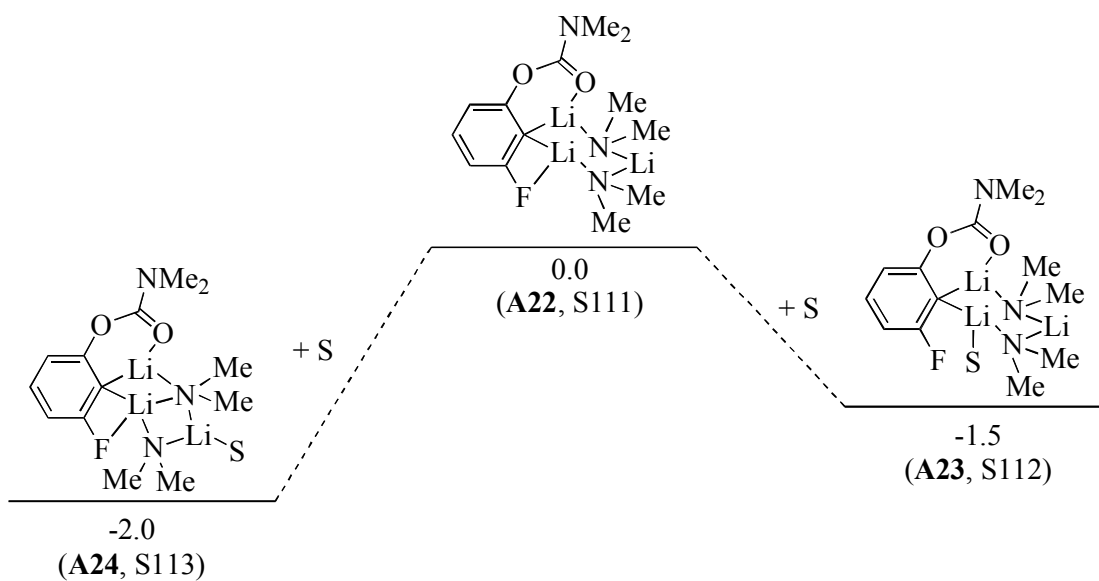

**Figure 65.** Relative free energies ( $\Delta G^\circ$ , kcal/mol). S = Me<sub>2</sub>O

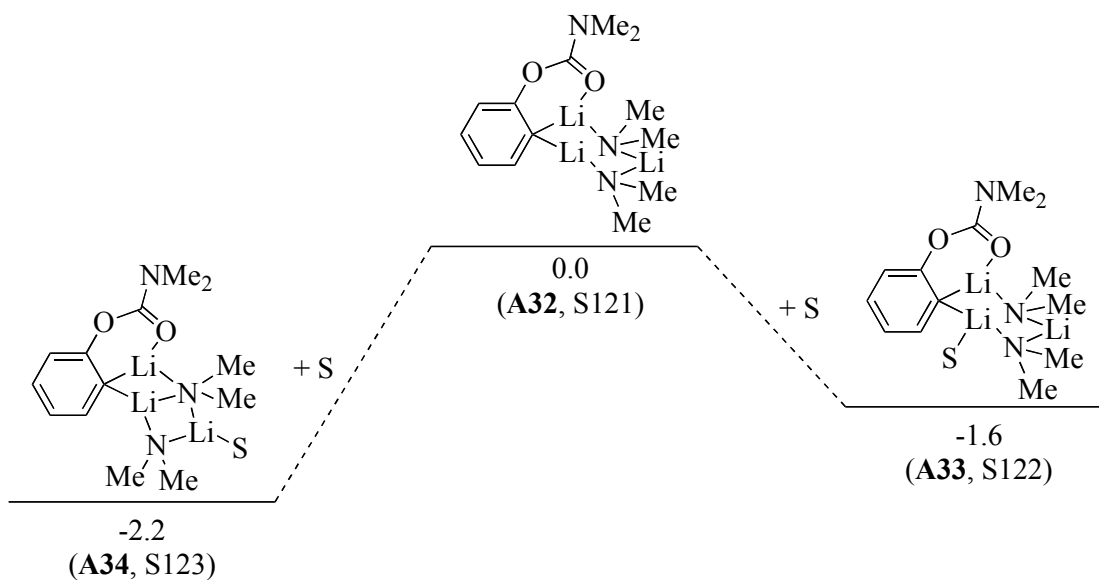

**Figure 66.** Relative free energies ( $\Delta G^\circ$ , kcal/mol). S = Me<sub>2</sub>O

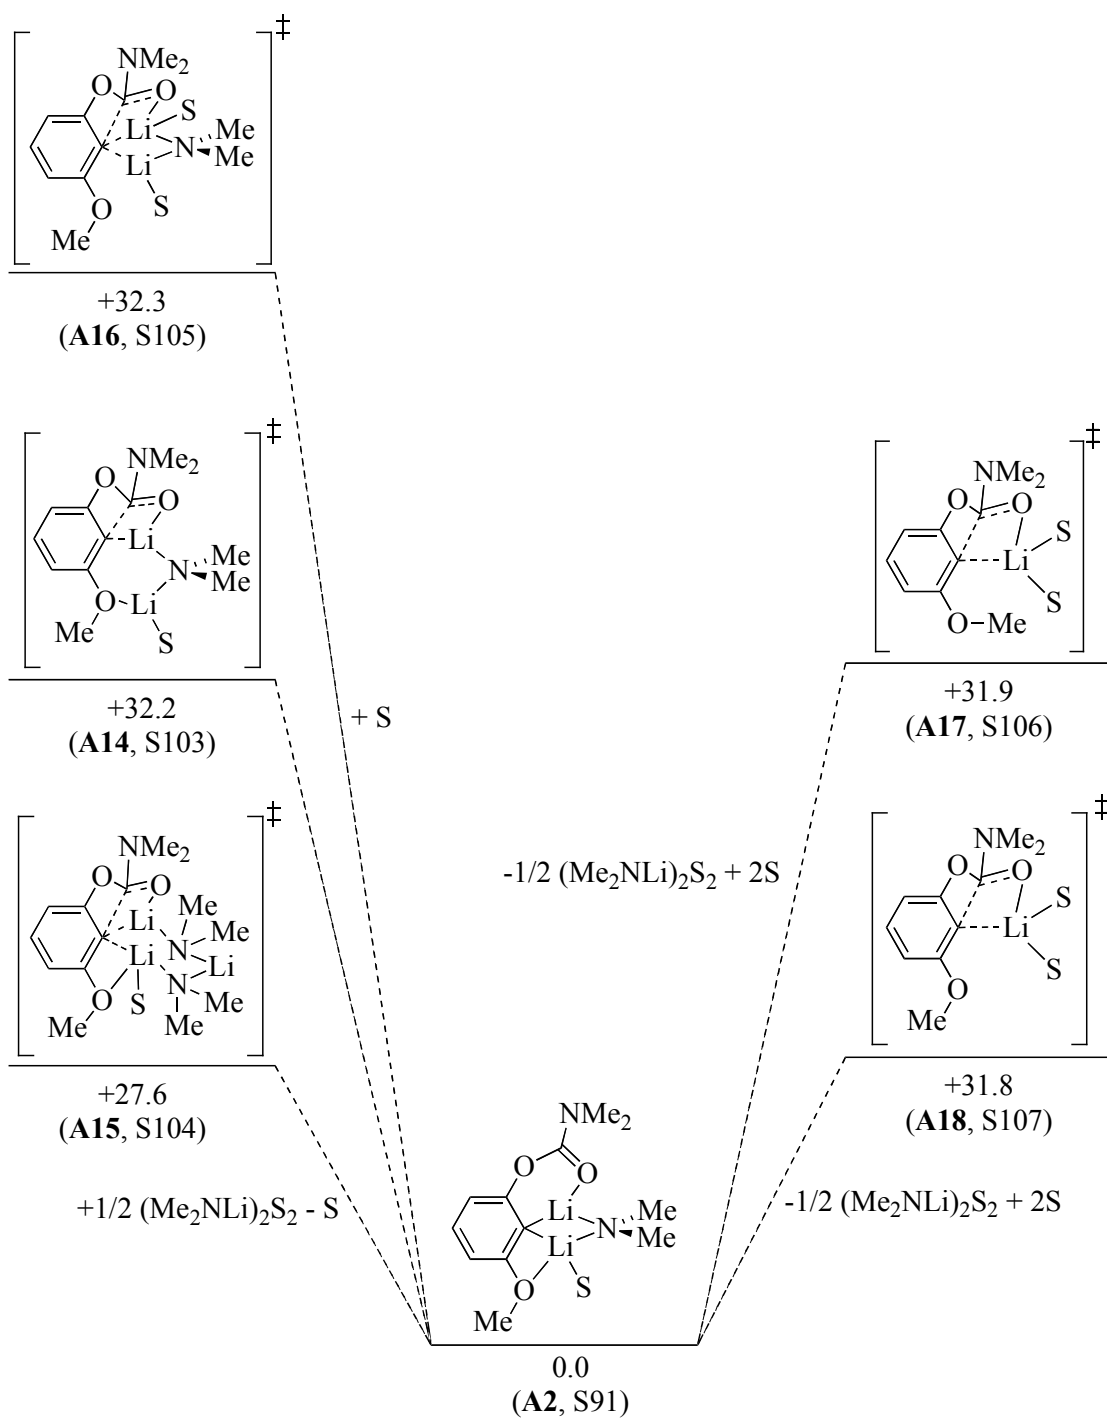

**Figure 67.** Relative free energies ( $\Delta G^\circ$ , kcal/mol). S = Me<sub>2</sub>O.

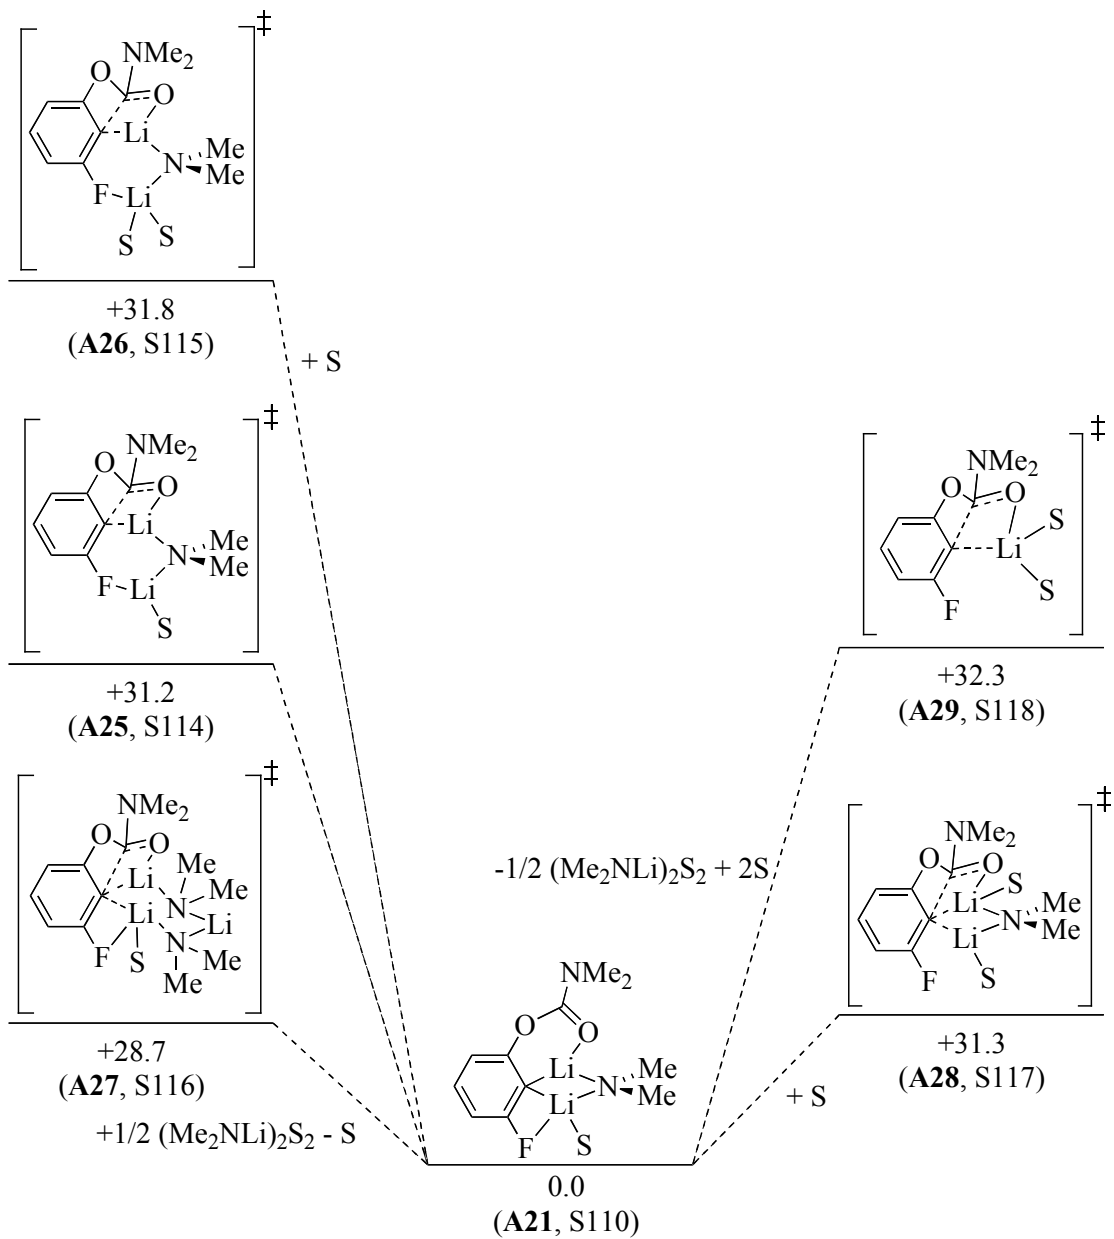

**Figure 68.** Relative free energies ( $\Delta G^\circ$ , kcal/mol). S = Me<sub>2</sub>O.

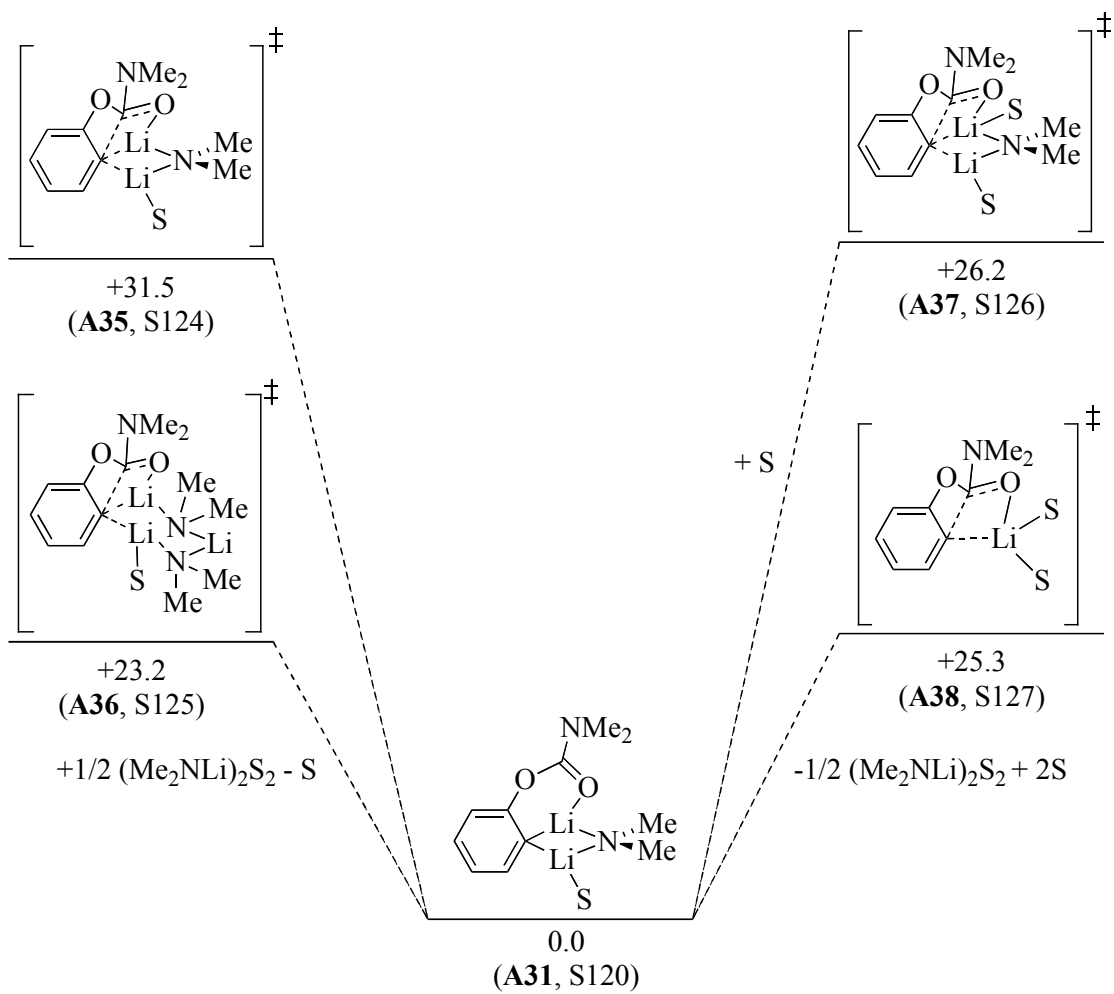

**Figure 69.** Relative free energies ( $\Delta G^\circ$ , kcal/mol). S = Me<sub>2</sub>O.



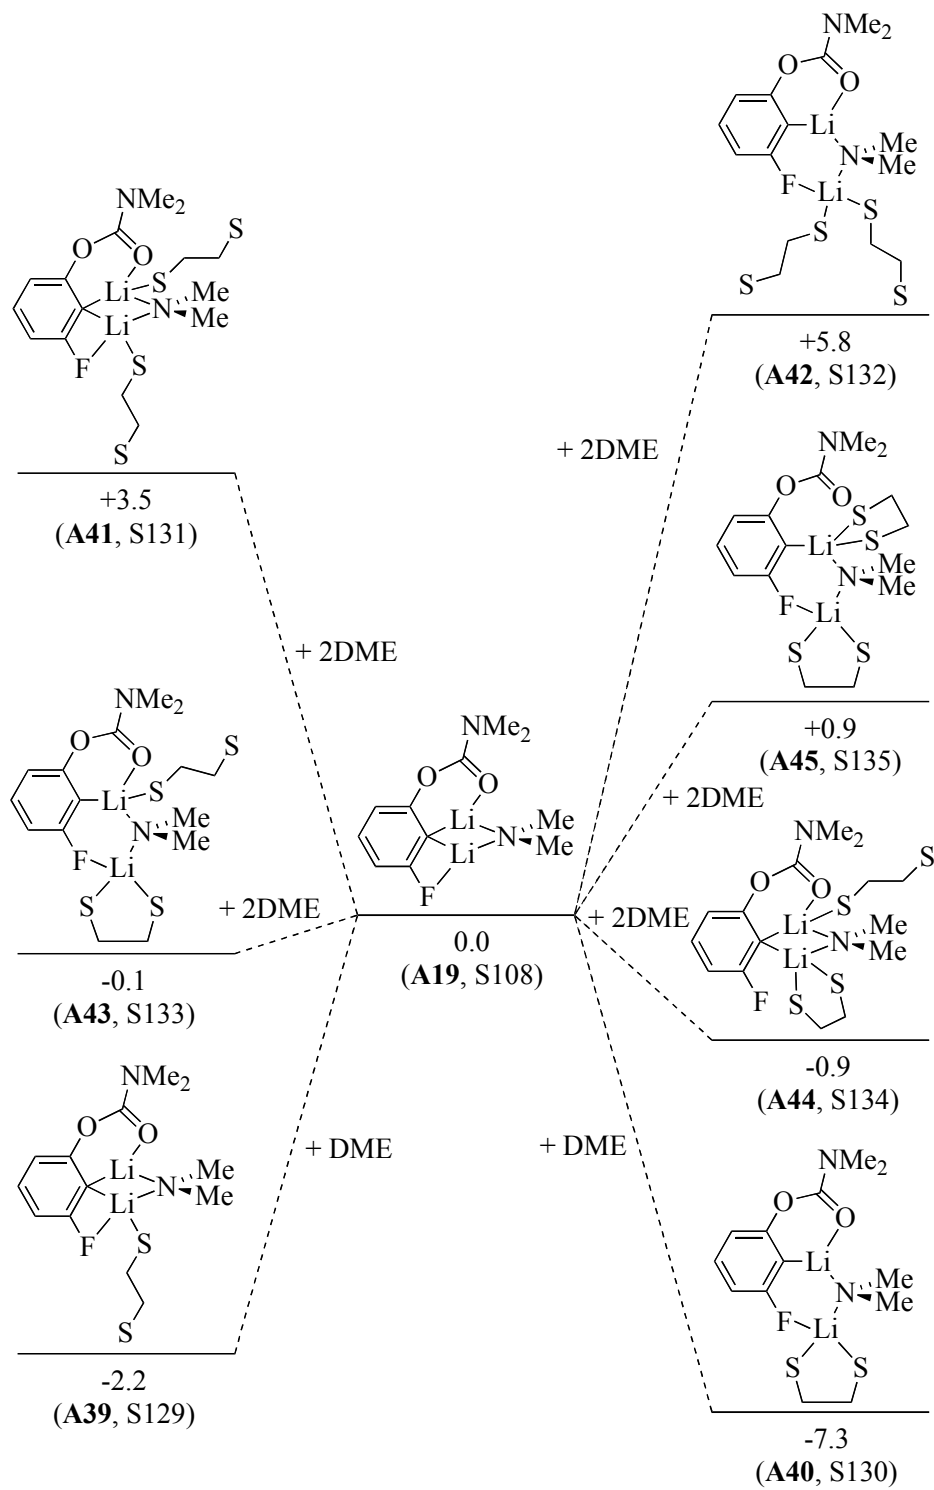

Figure 70. Relative free energies ( $\Delta G^\circ$ , kcal/mol). S = OMe.

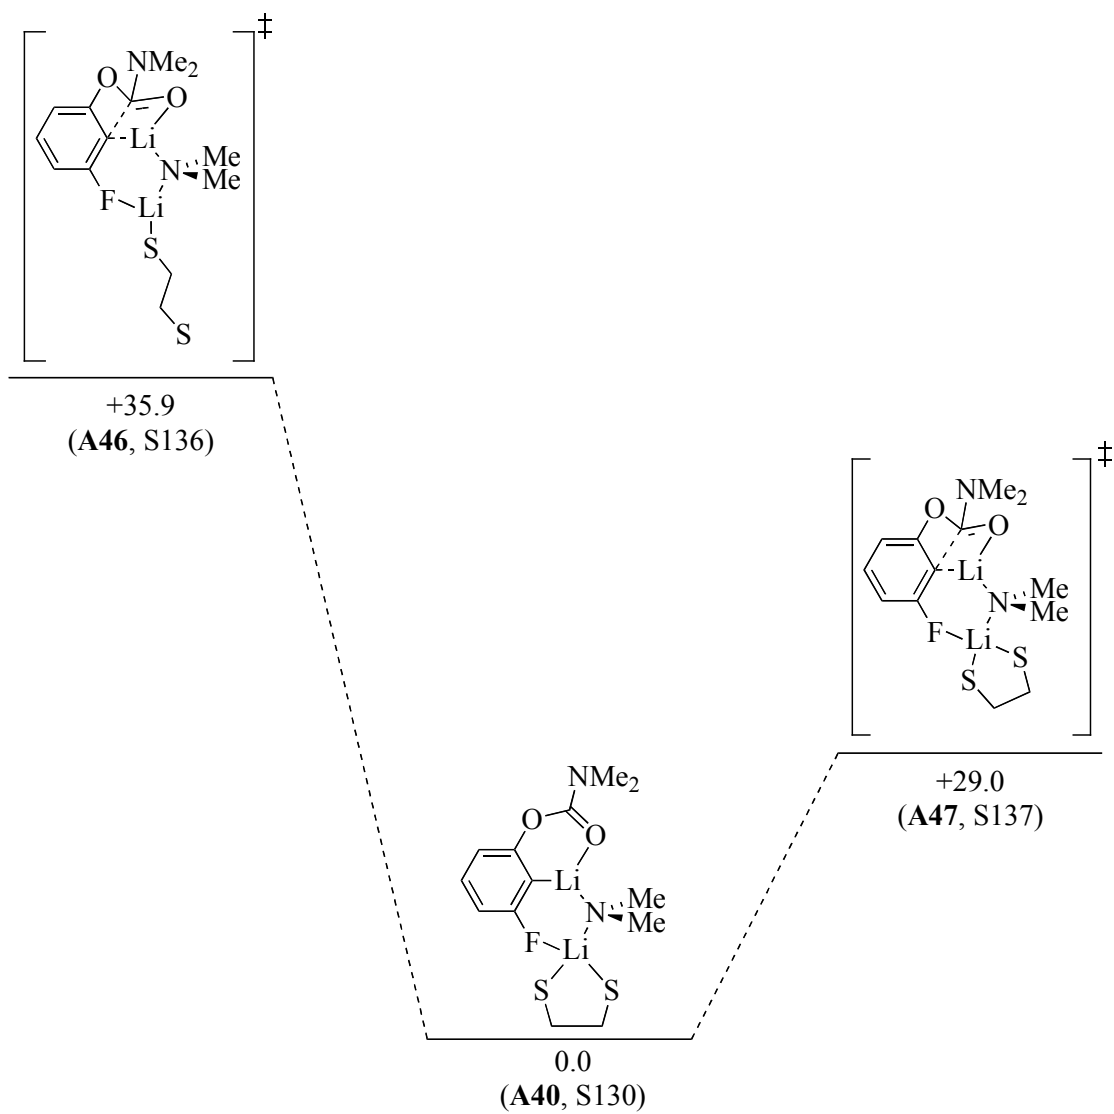

**Figure 71.** Relative free energies ( $\Delta G^\circ$ , kcal/mol). S = OMe.

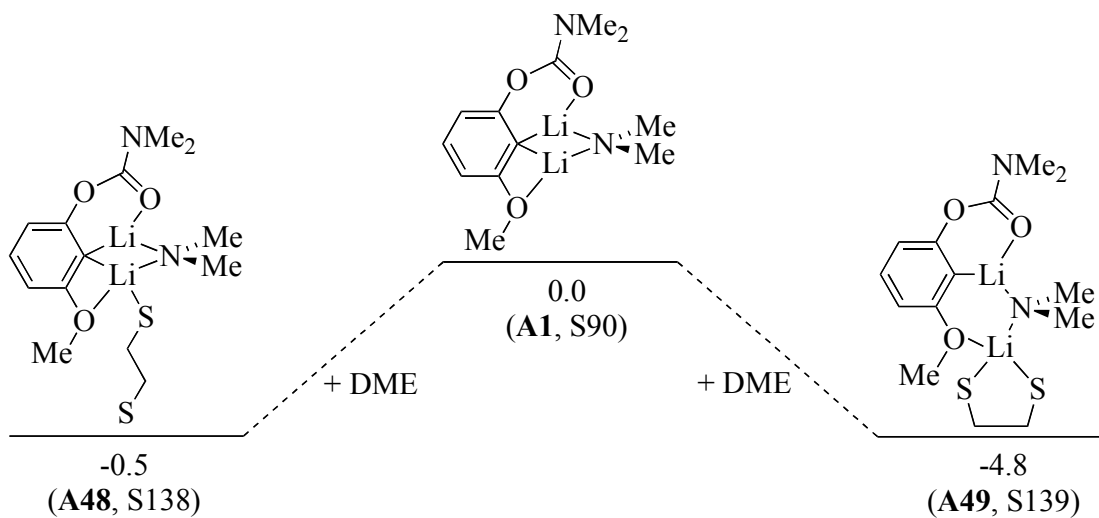

**Figure 72.** Relative free energies ( $\Delta G^\circ$ , kcal/mol). S = OMe.

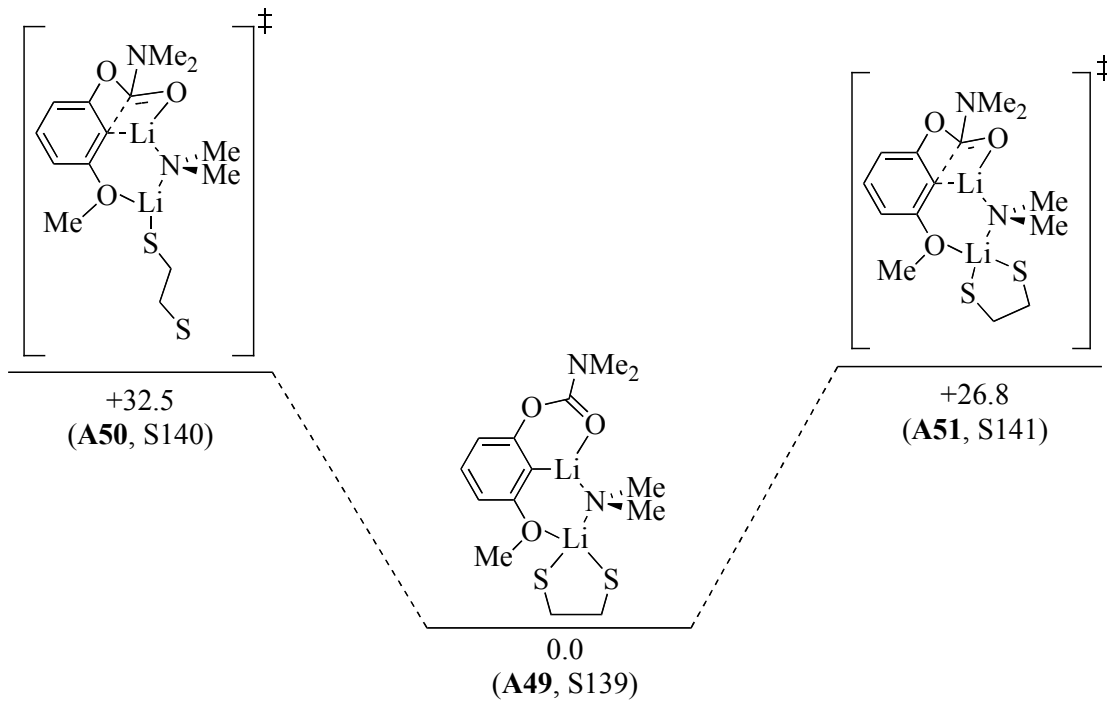

**Figure 73.** Relative free energies ( $\Delta G^\circ$ , kcal/mol). S = OMe.

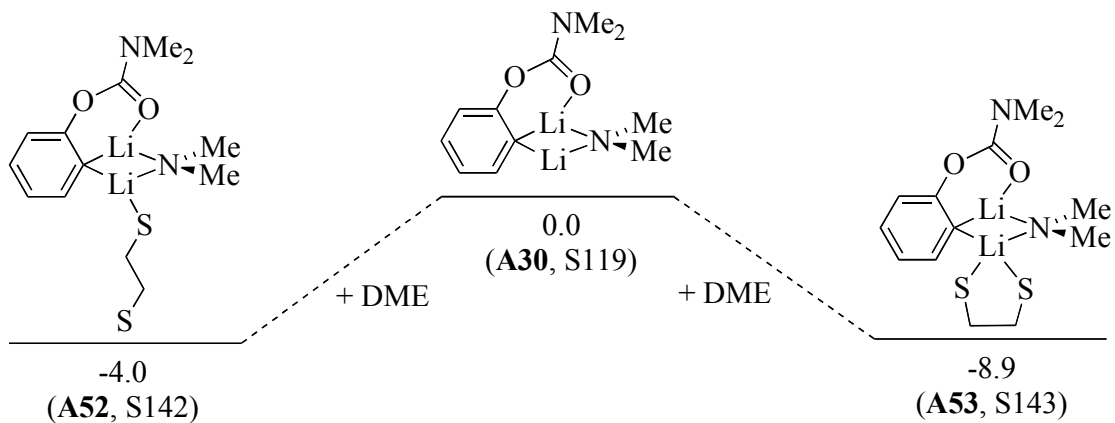

**Figure 74.** Relative free energies ( $\Delta G^\circ$ , kcal/mol). S = OMe.

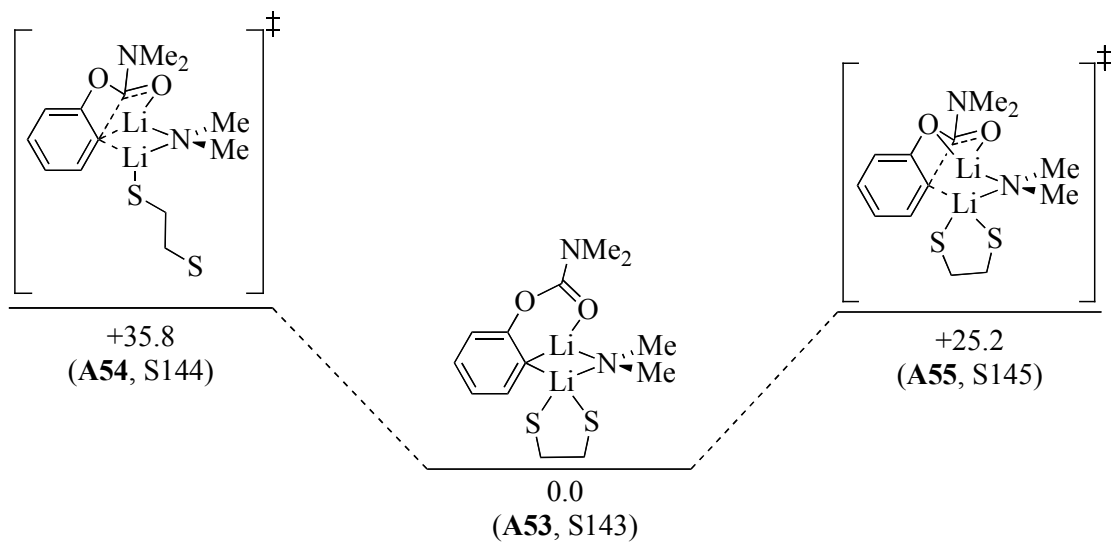

**Figure 75.** Relative free energies ( $\Delta G^\circ$ , kcal/mol). S = OMe.

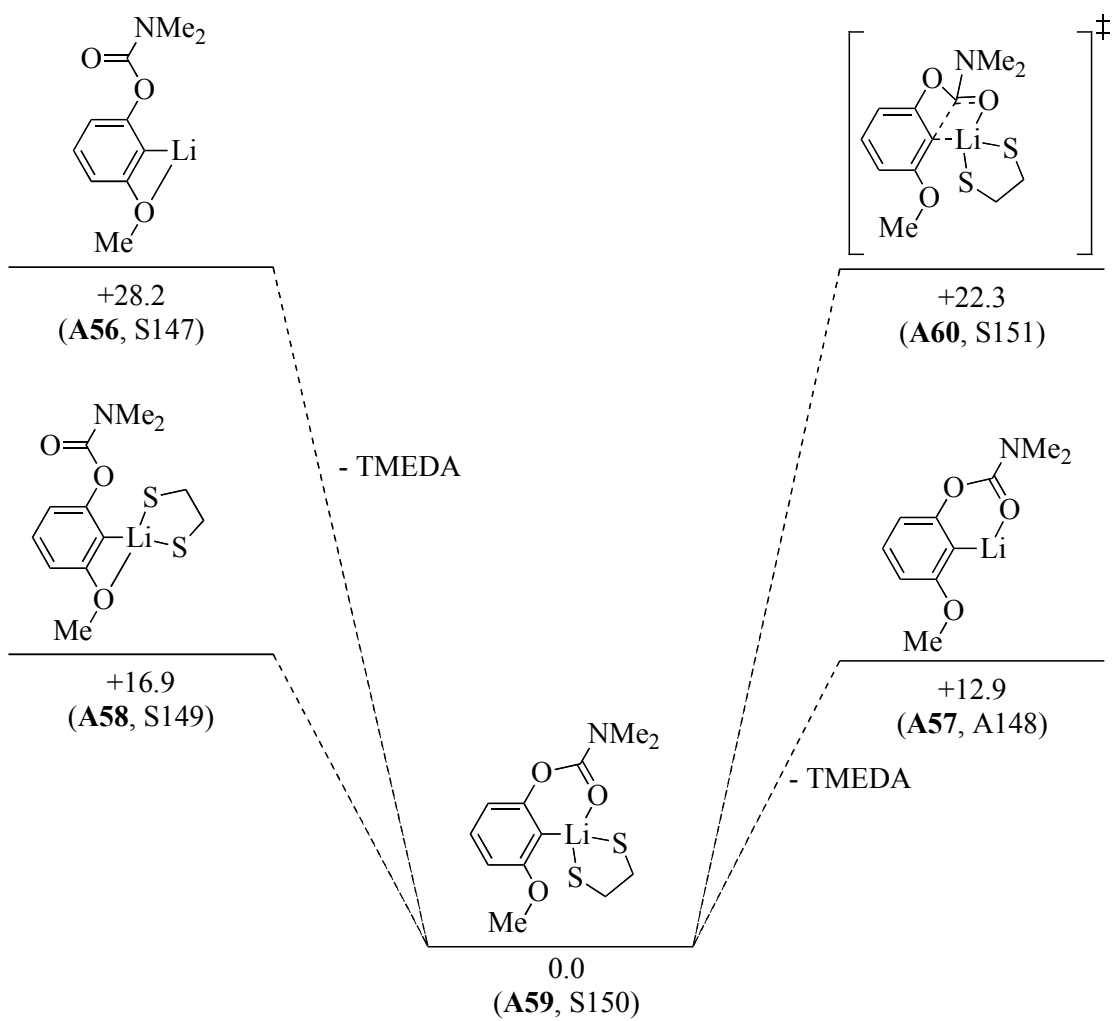

**Figure 76.** Relative free energies ( $\Delta G^\circ$ , kcal/mol). S = NMe<sub>2</sub>

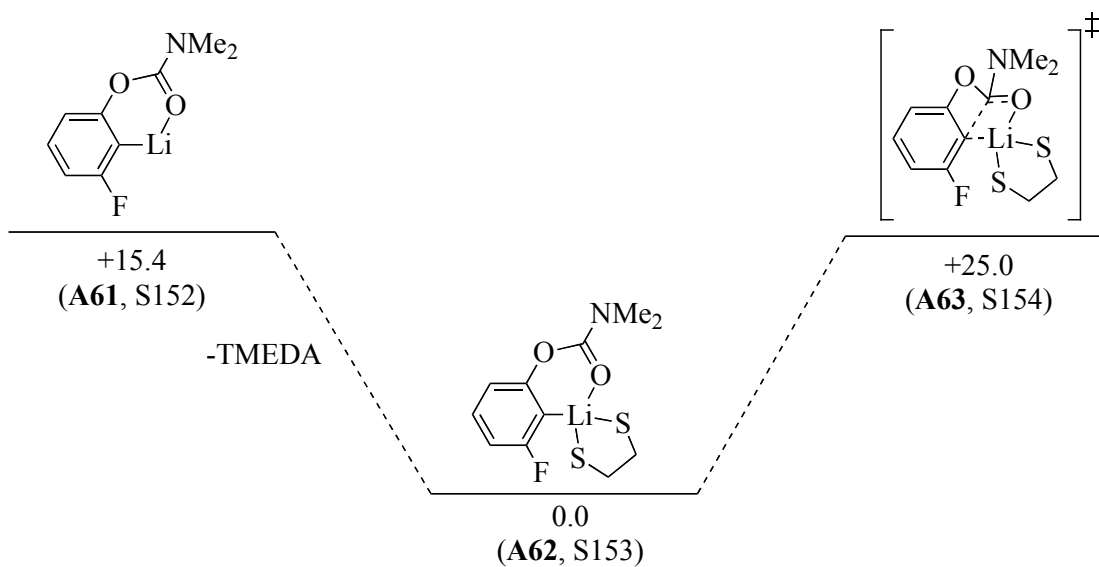

**Figure 77.** Relative free energies ( $\Delta G^\circ$ , kcal/mol). S = NMe<sub>2</sub>

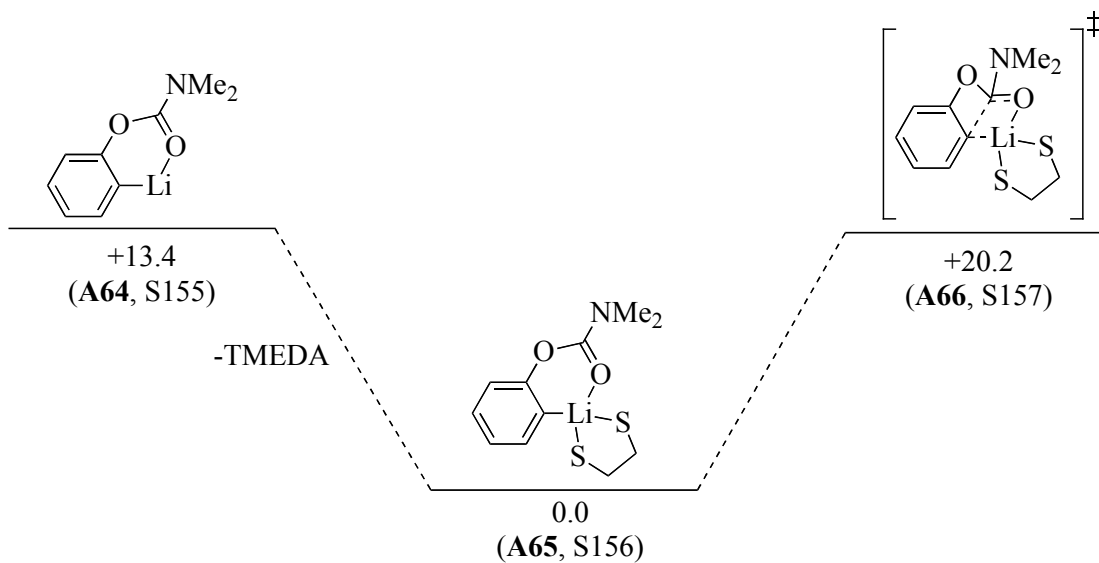

**Figure 78.** Relative free energies ( $\Delta G^\circ$ , kcal/mol). S = NMe<sub>2</sub>

**Table 5.** Optimized geometry, free energy ( $G^\circ$ , Hartrees), and cartesian coordinates (X,Y,Z).

|                      |                                                                                   |                         |           |
|----------------------|-----------------------------------------------------------------------------------|-------------------------|-----------|
| <chem>Me-O-Me</chem> |  | $G^\circ = -154.970104$ |           |
| Atom                 | X                                                                                 | Y                       | Z         |
| O                    | 0.000000                                                                          | -0.590089               | 0.000004  |
| C                    | 1.170987                                                                          | 0.195371                | 0.000000  |
| H                    | 2.021836                                                                          | -0.491272               | -0.000151 |
| H                    | 1.232054                                                                          | 0.839804                | -0.892910 |
| H                    | 1.232210                                                                          | 0.839598                | 0.893048  |
| C                    | -1.170987                                                                         | 0.195371                | 0.000000  |
| H                    | -1.231991                                                                         | 0.839904                | -0.892842 |
| H                    | -2.021836                                                                         | -0.491272               | -0.000291 |
| H                    | -1.232273                                                                         | 0.839498                | 0.893116  |

**Table 5 (Continued).**

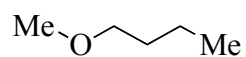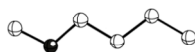

$G^\circ = -272.837541$

| Atom | X         | Y         | Z         |
|------|-----------|-----------|-----------|
| C    | -0.718160 | 0.391824  | 0.000007  |
| C    | 0.596507  | -0.377710 | -0.000006 |
| H    | -0.781230 | 1.046943  | 0.887608  |
| H    | -0.781197 | 1.047033  | -0.887529 |
| C    | 1.826039  | 0.539091  | -0.000020 |
| H    | 0.616898  | -1.034219 | 0.879944  |
| H    | 0.616872  | -1.034215 | -0.879960 |
| H    | 1.790202  | 1.199235  | -0.878403 |
| H    | 1.790190  | 1.199285  | 0.878325  |
| C    | 3.147212  | -0.235672 | 0.000010  |
| H    | 4.007874  | 0.442764  | 0.000069  |
| H    | 3.229139  | -0.878979 | 0.884609  |
| H    | 3.229215  | -0.878919 | -0.884626 |
| O    | -1.788791 | -0.535788 | -0.000060 |
| C    | -3.052409 | 0.089182  | 0.000047  |
| H    | -3.806358 | -0.702842 | -0.000044 |
| H    | -3.198185 | 0.719847  | 0.892862  |
| H    | -3.198222 | 0.720083  | -0.892596 |



Table 5 (Continued).

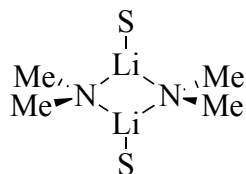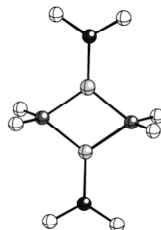

$$G^\circ = -594.095732$$

$$S = \text{Me}_2\text{O}$$

| Atom | X         | Y         | Z         | Atom | X         | Y         | Z         |
|------|-----------|-----------|-----------|------|-----------|-----------|-----------|
| C    | -0.136511 | -2.431283 | 1.173404  | O    | -3.111067 | 0.000030  | -0.087085 |
| H    | -1.020755 | -3.109124 | 1.137695  | O    | 3.111459  | -0.000164 | 0.087764  |
| H    | 0.732546  | -3.107438 | 1.343485  | N    | 0.000005  | -1.588870 | 0.002534  |
| H    | -0.243398 | -1.821323 | 2.084300  | C    | -3.884200 | -1.192867 | -0.019656 |
| C    | 0.136331  | -2.431260 | -1.168356 | H    | -4.450405 | -1.235823 | 0.921141  |
| H    | -0.732822 | -3.107320 | -1.338380 | H    | -4.583949 | -1.250871 | -0.864779 |
| H    | 0.243193  | -1.821290 | -2.079255 | H    | -3.181010 | -2.026301 | -0.063773 |
| H    | 1.020486  | -3.109225 | -1.132764 | C    | -3.884891 | 1.192437  | -0.019084 |
| C    | -0.136240 | 2.431889  | 1.173197  | H    | -4.584677 | 1.250446  | -0.864176 |
| H    | -0.243018 | 1.822120  | 2.084233  | H    | -4.451120 | 1.234618  | 0.921734  |
| H    | 0.732794  | 3.108127  | 1.343054  | H    | -3.182197 | 2.026311  | -0.062810 |
| H    | -1.020526 | 3.109669  | 1.137406  | C    | 3.884396  | 1.192366  | 0.012017  |
| C    | 0.136543  | 2.431376  | -1.168571 | H    | 4.592508  | 1.250489  | 0.850131  |
| H    | 0.243360  | 1.821213  | -2.079350 | H    | 4.441276  | 1.234591  | -0.934371 |
| H    | -0.732597 | 3.107418  | -1.338708 | H    | 3.182070  | 2.026159  | 0.062599  |
| H    | 1.020721  | 3.109319  | -1.133145 | C    | 3.884107  | -1.192891 | 0.012183  |
| Li   | -1.176805 | 0.000271  | -0.097749 | H    | 4.441018  | -1.235357 | -0.934176 |
| Li   | 1.177040  | 0.000115  | 0.102833  | H    | 4.592169  | -1.251090 | 0.850334  |
| N    | 0.000237  | 1.589228  | 0.002502  | H    | 3.181577  | -2.026507 | 0.062827  |

**Table 5 (Continued).**

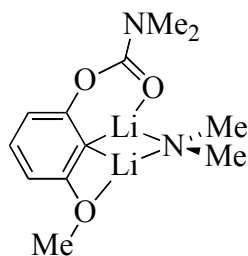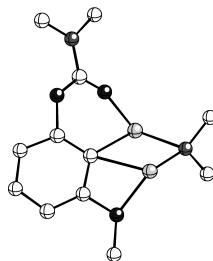

**A1**  
 $G^\circ = -818.192237$   
 See pp S75 and S83

| Atom | X         | Y         | Z         | Atom | X         | Y         | Z         |
|------|-----------|-----------|-----------|------|-----------|-----------|-----------|
| C    | 2.270501  | -2.533822 | -0.182127 | H    | 1.305036  | -4.413541 | -0.613829 |
| C    | 1.159825  | -3.363728 | -0.374591 | H    | 3.270839  | -2.945209 | -0.265146 |
| C    | -0.123650 | -2.846909 | -0.249645 | H    | -1.001026 | -3.472898 | -0.381585 |
| C    | -0.263244 | -1.488758 | 0.063712  | H    | 2.626820  | 2.803936  | -1.521787 |
| C    | 0.772645  | -0.583725 | 0.253390  | H    | 1.498924  | 4.175230  | -1.552338 |
| C    | 2.032776  | -1.192836 | 0.117127  | H    | 2.851269  | 4.174900  | -0.413689 |
| Li   | 1.965263  | 1.194949  | 0.841356  | H    | -3.606565 | -1.863559 | 1.025763  |
| O    | -1.663274 | 0.801906  | -0.926709 | H    | -4.651942 | -0.610571 | 1.735841  |
| Li   | 0.054816  | 1.378698  | -0.528572 | H    | -5.124333 | -1.403235 | 0.215174  |
| N    | 1.267670  | 2.809818  | 0.092768  | H    | -5.149281 | 0.777752  | -1.093390 |
| C    | 0.576787  | 3.781726  | 0.924286  | H    | -4.816987 | 1.620526  | 0.439122  |
| C    | 2.087019  | 3.515682  | -0.878213 | H    | -3.709624 | 1.819006  | -0.945664 |
| C    | -2.231915 | -0.066535 | -0.246313 | H    | -0.057204 | 3.275843  | 1.669918  |
| O    | -1.636691 | -1.141825 | 0.284424  | H    | 1.264843  | 4.446939  | 1.488454  |
| N    | -3.560169 | -0.016356 | 0.034904  | H    | -0.085907 | 4.462972  | 0.347644  |
| C    | -4.353079 | 1.117380  | -0.418777 | O    | 3.100987  | -0.291252 | 0.345884  |
| C    | -4.270710 | -1.034065 | 0.797514  | C    | 4.441026  | -0.734356 | 0.186691  |
| H    | 5.076604  | 0.133321  | 0.374408  | H    | 4.684801  | -1.527484 | 0.904272  |
| H    | 4.614921  | -1.100061 | -0.832333 |      |           |           |           |

**Table 5 (Continued).**

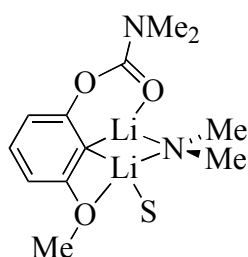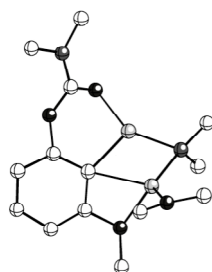

**A2**  
 $G^\circ = -973.168918$   
 See pp S75 and S78  
 $\text{Me}_2\text{O}$

| Atom | X         | Y         | Z         | Atom | X         | Y         | Z         |
|------|-----------|-----------|-----------|------|-----------|-----------|-----------|
| C    | -1.029163 | 3.217527  | -0.494364 | H    | 4.851929  | -0.780213 | 2.168090  |
| C    | 0.237888  | 3.775051  | -0.282558 | H    | 5.563331  | 0.325874  | 0.971084  |
| C    | 1.328182  | 2.951946  | -0.026765 | H    | 5.440690  | -1.687711 | -0.720260 |
| C    | 1.110852  | 1.568497  | 0.012214  | H    | 4.669052  | -2.672538 | 0.545760  |
| C    | -0.100074 | 0.923270  | -0.186387 | H    | 3.814988  | -2.367489 | -0.991137 |
| C    | -1.145448 | 1.826484  | -0.446262 | H    | -0.457650 | -3.453153 | 0.107831  |
| Li   | -1.792823 | -0.652031 | -0.005018 | H    | -1.997563 | -4.023054 | -0.573698 |
| O    | 2.128882  | -0.833335 | -1.153409 | H    | -0.531238 | -4.072998 | -1.555758 |
| Li   | 0.260446  | -0.936160 | -1.252080 | O    | -2.380768 | 1.181443  | -0.643980 |
| N    | -1.320883 | -2.094293 | -1.253395 | C    | -3.536128 | 1.954677  | -0.922311 |
| C    | -1.070137 | -3.450012 | -0.807883 | H    | -4.356411 | 1.245216  | -1.048784 |
| C    | -2.125136 | -2.136461 | -2.461038 | H    | -3.770423 | 2.639835  | -0.096731 |
| C    | 2.708239  | -0.267777 | -0.214375 | H    | -3.412134 | 2.534347  | -1.845601 |
| O    | 2.300054  | 0.857596  | 0.385414  | O    | -2.583747 | -0.967609 | 1.772165  |
| N    | 3.866215  | -0.745537 | 0.318751  | C    | -2.328792 | -0.123477 | 2.888486  |
| C    | 4.481654  | -1.937223 | -0.246445 | H    | -1.867874 | 0.786627  | 2.501100  |
| C    | 4.617328  | -0.068817 | 1.366805  | H    | -3.263576 | 0.124122  | 3.410668  |
| H    | 0.365552  | 4.853664  | -0.318529 | H    | -1.640067 | -0.609133 | 3.593948  |
| H    | -1.875635 | 3.867422  | -0.691130 | C    | -3.134908 | -2.229618 | 2.131117  |
| H    | 2.320319  | 3.360288  | 0.141794  | H    | -2.465165 | -2.766263 | 2.817365  |
| H    | -2.329256 | -1.117862 | -2.825095 | H    | -4.115364 | -2.101909 | 2.610967  |
| H    | -1.642597 | -2.687392 | -3.298550 | H    | -3.242908 | -2.802353 | 1.208894  |
| H    | -3.112548 | -2.631560 | -2.318865 | H    | 4.032855  | 0.750457  | 1.777517  |

**Table 5 (Continued).**

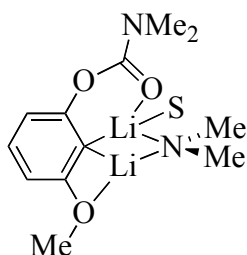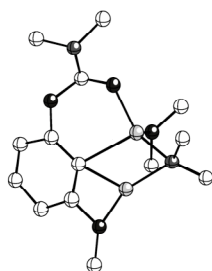

**A3**  
 $G^\circ = -973.161962$   
 See pg S75  
 S = Me<sub>2</sub>O

| Atom | X         | Y         | Z         | Atom | X         | Y         | Z         |
|------|-----------|-----------|-----------|------|-----------|-----------|-----------|
| C    | -2.131016 | -2.786077 | 0.184986  | H    | 3.762067  | -2.221612 | -0.951753 |
| C    | -1.090786 | -3.486031 | 0.810703  | H    | 5.083910  | -1.167492 | -1.504581 |
| C    | 0.211999  | -3.003590 | 0.752578  | H    | 5.062997  | -1.758824 | 0.172874  |
| C    | 0.443624  | -1.806350 | 0.062177  | H    | 5.123816  | 0.901226  | 0.734788  |
| C    | -0.521137 | -1.033202 | -0.564076 | H    | 4.989127  | 1.217308  | -1.011995 |
| C    | -1.802148 | -1.597927 | -0.469333 | H    | 3.727929  | 1.811187  | 0.099357  |
| Li   | -1.398631 | 0.487454  | -1.791492 | H    | 0.903269  | 2.167787  | -2.441837 |
| O    | 1.733416  | 0.725699  | 0.453063  | H    | -0.234529 | 3.370679  | -3.088792 |
| Li   | -0.087528 | 1.159914  | 0.136568  | H    | 0.668903  | 3.720357  | -1.610023 |
| N    | -0.904673 | 2.272571  | -1.361959 | O    | -2.776388 | -0.821259 | -1.143447 |
| C    | 0.138079  | 2.904015  | -2.150774 | C    | -4.109037 | -1.300157 | -1.230749 |
| C    | -1.890518 | 3.271260  | -1.002722 | H    | -4.664501 | -0.564483 | -1.816087 |
| C    | 2.347932  | -0.273804 | 0.063790  | H    | -4.148518 | -2.274699 | -1.733855 |
| O    | 1.837697  | -1.510150 | -0.040433 | H    | -4.565577 | -1.390611 | -0.236841 |
| N    | 3.664385  | -0.236243 | -0.286073 | O    | -0.820139 | 1.509430  | 1.988818  |
| C    | 4.418328  | 0.994749  | -0.102887 | C    | -2.157598 | 1.187322  | 2.342752  |
| C    | 4.431863  | -1.416411 | -0.659582 | H    | -2.848302 | 1.992271  | 2.054215  |
| H    | -1.304564 | -4.414367 | 1.333587  | H    | -2.415173 | 0.271361  | 1.807922  |
| H    | -3.142316 | -3.178688 | 0.218599  | H    | -2.238871 | 1.012890  | 3.425156  |
| H    | 1.035324  | -3.540202 | 1.214848  | C    | -0.339551 | 2.678935  | 2.638057  |
| H    | -2.705924 | 2.820467  | -0.416069 | H    | -0.930347 | 3.560481  | 2.352528  |
| H    | -1.475274 | 4.103944  | -0.389083 | H    | -0.373844 | 2.557189  | 3.730060  |
| H    | -2.363227 | 3.767196  | -1.878684 | H    | 0.697238  | 2.814076  | 2.323137  |

Table 5 (Continued).

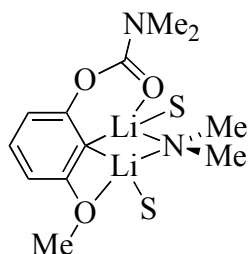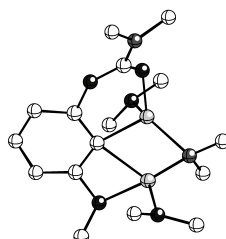

**A4**  
 $G^\circ = -1128.132284$   
 See pg S75  
 S = Me<sub>2</sub>O

| Atom | X         | Y         | Z         | Atom | X         | Y         | Z         |
|------|-----------|-----------|-----------|------|-----------|-----------|-----------|
| C    | 1.476647  | 3.102685  | -0.565074 | H    | -0.446619 | -3.128025 | -0.059299 |
| C    | 0.267918  | 3.784336  | -0.762476 | H    | 0.973204  | -4.122531 | 0.341798  |
| C    | -0.930261 | 3.081551  | -0.830257 | H    | -0.192236 | -3.706114 | 1.601601  |
| C    | -0.881536 | 1.687400  | -0.695324 | O    | 2.576984  | 0.934918  | -0.225017 |
| C    | 0.257628  | 0.929003  | -0.485408 | C    | 3.848912  | 1.555134  | -0.291138 |
| C    | 1.421507  | 1.712340  | -0.430009 | H    | 4.585933  | 0.758772  | -0.168228 |
| Li   | 1.521938  | -0.884765 | -0.514391 | H    | 4.004367  | 2.050837  | -1.258793 |
| O    | -2.081312 | -0.428842 | 0.812277  | H    | 3.978708  | 2.293377  | 0.511562  |
| Li   | -0.208018 | -0.501769 | 1.218661  | O    | 2.111831  | -1.594740 | -2.278170 |
| N    | 1.046159  | -2.061958 | 0.973652  | C    | 1.669201  | -1.004703 | -3.494136 |
| C    | 0.327057  | -3.289470 | 0.707487  | H    | 1.475741  | 0.048635  | -3.285138 |
| C    | 2.046389  | -2.316307 | 1.986708  | H    | 2.439431  | -1.096651 | -4.272978 |
| C    | -2.603481 | 0.026816  | -0.209777 | H    | 0.743270  | -1.481745 | -3.845710 |
| O    | -2.160582 | 1.081758  | -0.911550 | C    | 2.360223  | -2.991920 | -2.390610 |
| N    | -3.745664 | -0.495337 | -0.745372 | H    | 1.456714  | -3.525362 | -2.716878 |
| C    | -4.443750 | -1.557660 | -0.037973 | H    | 3.171880  | -3.183426 | -3.106685 |
| C    | -4.437526 | 0.085379  | -1.886753 | H    | 2.646156  | -3.343414 | -1.398301 |
| H    | 0.270845  | 4.866160  | -0.867848 | O    | -0.089671 | 0.423619  | 3.034617  |
| H    | 2.407715  | 3.659371  | -0.523354 | C    | 0.982814  | 1.295496  | 3.361216  |
| H    | -1.876903 | 3.588977  | -0.992464 | H    | 1.877999  | 0.728355  | 3.654145  |
| H    | 2.615225  | -1.400427 | 2.210340  | H    | 1.196582  | 1.884604  | 2.467796  |
| H    | 1.624952  | -2.677742 | 2.954576  | H    | 0.697386  | 1.967366  | 4.183732  |
| H    | 2.793101  | -3.092514 | 1.697594  | C    | -0.492756 | -0.389506 | 4.128072  |
| H    | -3.767826 | 0.744430  | -2.434203 | H    | 0.327822  | -1.039996 | 4.460763  |
| H    | -4.774136 | -0.718559 | -2.551881 | H    | -0.829014 | 0.232862  | 4.969982  |
| H    | -5.320455 | 0.657713  | -1.567228 | H    | -1.325267 | -1.003985 | 3.778875  |
| H    | -5.369429 | -1.182624 | 0.421544  | H    | -3.794934 | -1.956980 | 0.739179  |
| H    | -4.707355 | -2.357842 | -0.739803 |      |           |           |           |

Table 5 (Continued).

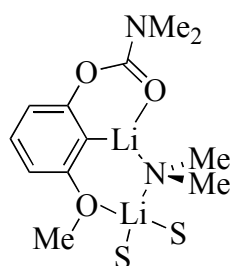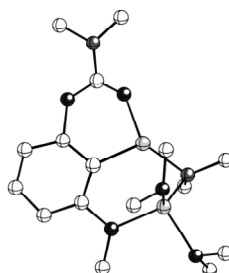

A5  
 $G^\circ = -1128.125069$   
 See pg S75  
 S = Me<sub>2</sub>O

| Atom | X         | Y         | Z         | Atom | X         | Y         | Z         |
|------|-----------|-----------|-----------|------|-----------|-----------|-----------|
| C    | 0.050006  | 3.370377  | -0.646994 | H    | 3.777656  | -3.111196 | -0.494132 |
| C    | 1.400765  | 3.738332  | -0.600133 | H    | -1.449960 | -3.356418 | 0.422003  |
| C    | 2.376594  | 2.775747  | -0.378629 | H    | -2.586119 | -3.555670 | -0.927269 |
| C    | 1.954931  | 1.449803  | -0.210419 | H    | -0.882707 | -3.969195 | -1.143792 |
| C    | 0.648759  | 0.990004  | -0.239763 | O    | -1.622286 | 1.595757  | -0.503024 |
| C    | -0.273175 | 2.021355  | -0.469839 | C    | -2.634130 | 2.571428  | -0.707759 |
| Li   | -1.954351 | -0.346951 | 0.040473  | H    | -3.585779 | 2.041000  | -0.649975 |
| O    | 2.325526  | -1.376388 | -0.812568 | H    | -2.606213 | 3.346252  | 0.069890  |
| Li   | 0.481312  | -1.021664 | -0.766043 | H    | -2.534884 | 3.050232  | -1.690196 |
| N    | -1.272256 | -1.855173 | -1.049101 | O    | -4.059093 | -0.392604 | 0.126733  |
| C    | -1.554313 | -3.221077 | -0.665897 | C    | -4.624322 | -1.172375 | 1.176695  |
| C    | -1.414503 | -1.742355 | -2.491028 | H    | -4.110920 | -0.890860 | 2.096167  |
| C    | 3.174292  | -0.697978 | -0.218047 | H    | -5.701323 | -0.972370 | 1.269326  |
| O    | 3.077110  | 0.598617  | 0.089680  | H    | -4.470852 | -2.244128 | 0.989721  |
| N    | 4.355511  | -1.235844 | 0.209643  | C    | -4.605772 | -0.742454 | -1.143217 |
| C    | 4.674854  | -2.614236 | -0.130372 | H    | -4.395877 | -1.792207 | -1.380787 |
| C    | 5.434353  | -0.450044 | 0.791208  | H    | -5.691240 | -0.567808 | -1.154994 |
| H    | 1.681060  | 4.779332  | -0.737948 | H    | -4.126120 | -0.107570 | -1.890143 |
| H    | -0.698776 | 4.135055  | -0.824084 | O    | -1.629549 | -0.322952 | 2.095008  |
| H    | 3.430885  | 3.033967  | -0.335880 | C    | -0.526328 | -1.101678 | 2.553394  |
| H    | -1.199011 | -0.714662 | -2.824083 | H    | 0.420483  | -0.599082 | 2.320024  |
| H    | -0.734095 | -2.415578 | -3.059954 | H    | -0.602538 | -1.271845 | 3.637151  |
| H    | -2.435266 | -1.989013 | -2.863195 | H    | -0.569973 | -2.058370 | 2.029791  |
| H    | 5.053960  | 0.505283  | 1.144163  | C    | -1.656809 | 0.963075  | 2.707871  |
| H    | 5.866111  | -0.999078 | 1.636267  | H    | -1.741401 | 0.864898  | 3.799789  |
| H    | 6.232531  | -0.268943 | 0.056893  | H    | -0.753230 | 1.531754  | 2.457258  |
| H    | 5.449784  | -2.657315 | -0.908761 | H    | -2.534310 | 1.486114  | 2.322581  |
| H    | 5.049568  | -3.136593 | 0.758025  |      |           |           |           |

Table 5 (Continued).

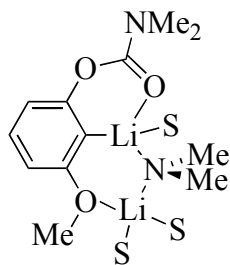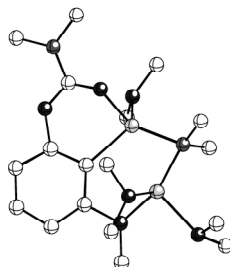

**A6**  
 $G^\circ = -1283.086394$   
 See pg S75  
 $S = \text{Me}_2\text{O}$

| Atom | X         | Y         | Z         | Atom | X         | Y         | Z         |
|------|-----------|-----------|-----------|------|-----------|-----------|-----------|
| C    | 0.669624  | 3.221493  | 1.235059  | O    | 1.891273  | 1.104910  | 1.321496  |
| C    | -0.520778 | 3.896578  | 0.936033  | H    | -3.648173 | -1.857321 | -2.089695 |
| C    | -1.629005 | 3.183818  | 0.494908  | H    | 0.753867  | -2.262415 | -2.283009 |
| C    | -1.506881 | 1.791782  | 0.381944  | H    | 1.970620  | -3.402669 | -1.665842 |
| C    | -0.380213 | 1.036113  | 0.667766  | H    | 0.255971  | -3.695070 | -1.361157 |
| C    | 0.696120  | 1.830209  | 1.079840  | C    | 2.955707  | 1.781090  | 1.972260  |
| Li   | 2.028576  | -0.342097 | -0.194134 | H    | 3.721900  | 1.033052  | 2.182600  |
| O    | -1.981553 | -0.630912 | -1.136353 | H    | 3.391983  | 2.567578  | 1.341665  |
| Li   | -0.576377 | -1.034787 | 0.190671  | H    | 2.618220  | 2.227483  | 2.915896  |
| N    | 1.090827  | -2.079373 | -0.211151 | O    | 4.162002  | -0.673422 | -0.296286 |
| C    | 1.016539  | -2.880965 | -1.412490 | C    | 4.499786  | -1.219367 | -1.570879 |
| C    | 1.438185  | -2.945242 | 0.893815  | H    | 3.975696  | -0.624644 | -2.318957 |
| C    | -2.897070 | 0.102046  | -0.748210 | H    | 5.585240  | -1.162866 | -1.737918 |
| O    | -2.764593 | 1.201258  | 0.006907  | H    | 4.171019  | -2.264164 | -1.642722 |
| N    | -4.207108 | -0.131065 | -1.071083 | C    | 4.776057  | -1.405191 | 0.758203  |
| C    | -4.559625 | -1.340993 | -1.794277 | H    | 4.486793  | -2.463120 | 0.722188  |
| C    | -5.316707 | 0.693186  | -0.618423 | H    | 5.871380  | -1.323478 | 0.700367  |
| H    | -0.572908 | 4.976533  | 1.048059  | H    | 4.432353  | -0.975708 | 1.701105  |
| H    | 1.528227  | 3.790601  | 1.577397  | O    | 2.024208  | 0.854568  | -1.880337 |
| H    | -2.564155 | 3.682126  | 0.254099  | C    | 0.822502  | 0.967227  | -2.643933 |
| H    | 1.515960  | -2.373247 | 1.832093  | H    | 0.183602  | 1.763553  | -2.244946 |
| H    | 0.700505  | -3.761780 | 1.077524  | H    | 1.063680  | 1.174211  | -3.696850 |
| H    | 2.410307  | -3.478410 | 0.760477  | H    | 0.293867  | 0.018331  | -2.558533 |
| H    | -4.943984 | 1.625476  | -0.201952 | C    | 2.752599  | 2.075108  | -1.842868 |
| H    | -5.978322 | 0.915490  | -1.465330 | H    | 3.020883  | 2.397645  | -2.859673 |
| H    | -5.907241 | 0.171297  | 0.148175  | H    | 2.166254  | 2.864686  | -1.354688 |
| H    | -5.168059 | -2.006875 | -1.165799 | H    | 3.663597  | 1.886603  | -1.270726 |
| H    | -5.141980 | -1.090076 | -2.690268 | O    | -1.824605 | -1.889724 | 1.637409  |
| C    | -2.295798 | -3.221259 | 1.511634  | H    | -1.575998 | -3.938916 | 1.929355  |
| H    | -3.263277 | -3.344170 | 2.021677  | H    | -2.420550 | -3.416622 | 0.444477  |
| C    | -1.610540 | -1.500896 | 2.987536  | H    | -1.242239 | -0.474147 | 2.957811  |
| H    | -2.549596 | -1.547560 | 3.558897  | H    | -0.864947 | -2.149523 | 3.470011  |

**Table 5 (Continued).**

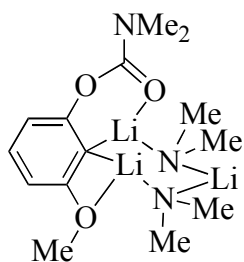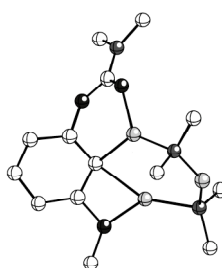

**A7**  
 $G^\circ = -960.273556$   
 See pg 76

| Atom | X         | Y         | Z         | Atom | X         | Y         | Z         |
|------|-----------|-----------|-----------|------|-----------|-----------|-----------|
| C    | -0.907700 | 3.409275  | 0.386237  | N    | -1.204538 | -1.966426 | 1.787872  |
| C    | 0.408370  | 3.879664  | 0.459958  | N    | -2.495636 | -1.696198 | -1.620509 |
| C    | 1.473929  | 3.025277  | 0.196954  | Li   | -2.117228 | -2.358124 | 0.154814  |
| C    | 1.187363  | 1.695471  | -0.131644 | C    | -2.037665 | -1.286114 | 2.773588  |
| C    | -0.080169 | 1.131721  | -0.207258 | H    | -1.457740 | -0.871832 | 3.627233  |
| C    | -1.097447 | 2.065130  | 0.060443  | H    | -2.570482 | -0.441850 | 2.311118  |
| O    | 1.968627  | -0.767626 | 0.951664  | H    | -2.804618 | -1.944706 | 3.234186  |
| C    | 2.631339  | -0.237063 | 0.048806  | C    | -0.511223 | -3.071090 | 2.438741  |
| O    | 2.352110  | 0.956787  | -0.498623 | H    | -1.199571 | -3.818326 | 2.888012  |
| N    | 3.741876  | -0.807785 | -0.483156 | H    | 0.123208  | -3.608772 | 1.718681  |
| C    | 4.229489  | -2.072117 | 0.050278  | H    | 0.152841  | -2.744924 | 3.267980  |
| C    | 4.562966  | -0.180447 | -1.510606 | C    | -3.909764 | -1.568576 | -1.948394 |
| H    | 0.595005  | 4.918679  | 0.716952  | H    | -4.444187 | -1.019573 | -1.157942 |
| H    | -1.734205 | 4.084927  | 0.579271  | H    | -4.092578 | -1.024180 | -2.899751 |
| H    | 2.501734  | 3.373291  | 0.232327  | H    | -4.424930 | -2.545642 | -2.065356 |
| H    | 4.057283  | 0.693354  | -1.913670 | C    | -1.830292 | -2.434306 | -2.687328 |
| H    | 5.534046  | 0.122905  | -1.096602 | H    | -0.757009 | -2.546241 | -2.471187 |
| H    | 4.743184  | -0.896646 | -2.321054 | H    | -2.239308 | -3.456059 | -2.837057 |
| H    | 4.313147  | -2.811675 | -0.755416 | H    | -1.907977 | -1.938168 | -3.678128 |
| H    | 5.221006  | -1.937908 | 0.502174  | Li   | -1.650953 | -0.018505 | -1.140237 |
| H    | 3.535952  | -2.434959 | 0.806273  | Li   | 0.101548  | -0.672573 | 1.065200  |
| O    | -2.382247 | 1.503390  | -0.074423 | H    | -3.592668 | 2.745959  | 1.078272  |
| C    | -3.527247 | 2.334698  | 0.064057  | H    | -4.391719 | 1.696049  | -0.125023 |
| H    | -3.512039 | 3.157235  | -0.662020 |      |           |           |           |



**Table 5 (Continued).**

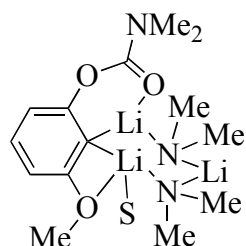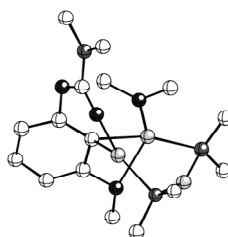

**A8**  
 $G^\circ = -1115.243685$   
 See pg S76  
 $S = \text{Me}_2\text{O}$

| Atom | X         | Y         | Z         | Atom | X         | Y         | Z         |
|------|-----------|-----------|-----------|------|-----------|-----------|-----------|
| C    | 0.731778  | -1.704939 | 2.800471  | N    | 0.410792  | 3.134734  | 0.839332  |
| C    | -0.528379 | -2.267752 | 3.035881  | N    | 2.440676  | 1.167326  | -1.644711 |
| C    | -1.584781 | -2.012892 | 2.166752  | Li   | 1.738539  | 2.353931  | -0.287740 |
| C    | -1.339727 | -1.180363 | 1.068205  | C    | 0.803325  | 3.309256  | 2.230640  |
| C    | -0.132348 | -0.569623 | 0.757014  | H    | -0.054546 | 3.510549  | 2.909409  |
| C    | 0.880356  | -0.880225 | 1.680945  | H    | 1.302011  | 2.403277  | 2.607162  |
| O    | -2.511015 | 1.205201  | 0.206309  | H    | 1.505479  | 4.156439  | 2.388113  |
| C    | -2.920039 | 0.116163  | -0.218453 | C    | -0.241403 | 4.350178  | 0.375819  |
| O    | -2.461825 | -1.080254 | 0.186341  | H    | 0.407756  | 5.249573  | 0.442335  |
| N    | -3.909664 | 0.010948  | -1.142871 | H    | -0.544365 | 4.250938  | -0.677211 |
| C    | -4.588687 | 1.212685  | -1.607615 | H    | -1.158394 | 4.603553  | 0.951072  |
| C    | -4.462238 | -1.259295 | -1.593053 | C    | 3.893105  | 1.181522  | -1.675267 |
| H    | -0.678250 | -2.907940 | 3.901042  | H    | 4.306478  | 0.955200  | -0.680269 |
| H    | 1.549411  | -1.916396 | 3.481433  | H    | 4.336378  | 0.438621  | -2.377097 |
| H    | -2.568007 | -2.445684 | 2.325335  | H    | 4.323511  | 2.158337  | -1.989269 |
| H    | -3.808924 | -2.077330 | -1.299630 | C    | 1.939452  | 1.470311  | -2.976092 |
| H    | -5.460506 | -1.424586 | -1.164564 | H    | 0.839154  | 1.470833  | -2.985089 |
| H    | -4.555059 | -1.247196 | -2.685270 | H    | 2.266546  | 2.460829  | -3.361104 |
| H    | -4.594554 | 1.235789  | -2.703791 | H    | 2.264233  | 0.738612  | -3.749358 |
| H    | -5.628520 | 1.228805  | -1.254302 | O    | 1.777529  | -2.158458 | -1.548440 |
| H    | -4.067235 | 2.089142  | -1.228051 | C    | 1.055494  | -3.341414 | -1.225912 |
| O    | 2.114401  | -0.305607 | 1.337198  | H    | 0.448424  | -3.668787 | -2.081976 |
| C    | 3.257073  | -0.602038 | 2.129190  | H    | 1.743741  | -4.151499 | -0.945775 |
| H    | 3.459932  | -1.680563 | 2.152985  | H    | 0.404167  | -3.100014 | -0.385826 |
| H    | 4.095332  | -0.085171 | 1.658587  | C    | 2.643057  | -2.325477 | -2.665823 |
| H    | 3.132242  | -0.234286 | 3.154996  | H    | 3.125078  | -1.363621 | -2.840366 |
| Li   | -0.715918 | 1.536067  | 0.655811  | H    | 3.402893  | -3.092390 | -2.457997 |
| Li   | 1.561214  | -0.353417 | -0.720461 | H    | 2.072517  | -2.619480 | -3.558079 |

**Table 5 (Continued).**

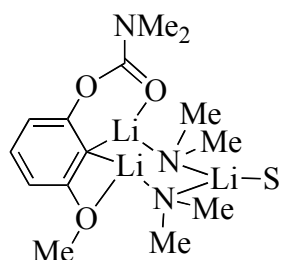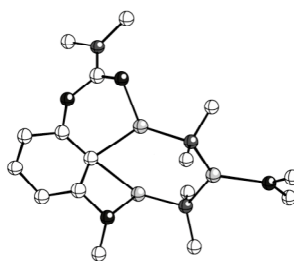

**A9**  
 $G^\circ = -1115.244712$   
 See pg S76  
 S = Me<sub>2</sub>O

| Atom | X         | Y         | Z         | Atom | X        | Y         | Z         |
|------|-----------|-----------|-----------|------|----------|-----------|-----------|
| C    | -2.270820 | 3.409187  | -0.448941 | Li   | 0.549807 | 1.193804  | 0.919048  |
| C    | -3.591172 | 2.945966  | -0.483293 | N    | 1.480679 | -0.591933 | -1.582832 |
| C    | -3.870558 | 1.608445  | -0.225469 | N    | 2.151721 | 0.505616  | 1.736495  |
| C    | -2.799110 | 0.753918  | 0.060082  | Li   | 2.624866 | -0.411851 | 0.027900  |
| C    | -1.458777 | 1.114686  | 0.097426  | C    | 1.739026 | 0.432230  | -2.584968 |
| C    | -1.266103 | 2.482402  | -0.166093 | H    | 1.036276 | 0.398431  | -3.448107 |
| O    | -1.795628 | -1.682116 | -0.951273 | H    | 1.651670 | 1.435666  | -2.144133 |
| C    | -2.682098 | -1.666823 | -0.085726 | H    | 2.752739 | 0.365549  | -3.042198 |
| O    | -3.235605 | -0.556634 | 0.424548  | C    | 1.582277 | -1.899491 | -2.216764 |
| N    | -3.213593 | -2.801094 | 0.440897  | H    | 2.577211 | -2.100371 | -2.673294 |
| C    | -2.770956 | -4.098978 | -0.047635 | H    | 1.401349 | -2.700718 | -1.484997 |
| C    | -4.290878 | -2.813894 | 1.421347  | H    | 0.852787 | -2.049980 | -3.043733 |
| H    | -4.399018 | 3.637410  | -0.706694 | C    | 3.085883 | 1.542446  | 2.141139  |
| H    | -2.061102 | 4.456320  | -0.639789 | H    | 3.314308 | 2.211750  | 1.297279  |
| H    | -4.888201 | 1.229977  | -0.233197 | H    | 2.707725 | 2.183374  | 2.968650  |
| H    | -4.483088 | -1.806182 | 1.780643  | H    | 4.061039 | 1.148992  | 2.505797  |
| H    | -5.209881 | -3.220761 | 0.978001  | C    | 1.885835 | -0.358208 | 2.874405  |
| H    | -4.007911 | -3.449592 | 2.269113  | H    | 1.172243 | -1.150745 | 2.602929  |
| H    | -2.416203 | -4.713593 | 0.788937  | H    | 2.793453 | -0.868299 | 3.271573  |
| H    | -3.600458 | -4.626119 | -0.537336 | H    | 1.454948 | 0.177630  | 3.748747  |
| H    | -1.962930 | -3.957582 | -0.762653 | O    | 4.488867 | -1.076119 | -0.086668 |
| O    | 0.089765  | 2.855027  | -0.082601 | C    | 5.270810 | -1.337010 | 1.072803  |
| C    | 0.446274  | 4.225365  | -0.198325 | H    | 5.621873 | -2.378802 | 1.076926  |
| H    | -0.058302 | 4.833356  | 0.563180  | H    | 6.139290 | -0.665056 | 1.116597  |
| H    | 1.526080  | 4.273008  | -0.047283 | H    | 4.629499 | -1.157748 | 1.936222  |
| H    | 0.200263  | 4.612683  | -1.194350 | C    | 5.215396 | -1.241183 | -1.298067 |
| Li   | -0.390695 | -0.441641 | -1.002547 | H    | 6.075917 | -0.557606 | -1.329805 |
| H    | 5.574273  | -2.274869 | -1.400409 | H    | 4.531222 | -1.010798 | -2.115298 |

**Table 5 (Continued).**

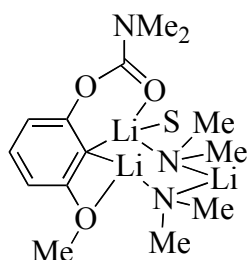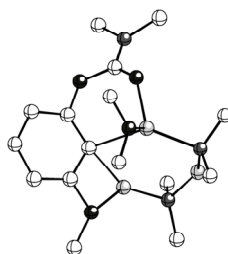

**A10**  
 $G^\circ = -1115.240119$   
 See pg S76  
 $S = \text{Me}_2\text{O}$

| Atom | X         | Y         | Z         | Atom | X         | Y         | Z         |
|------|-----------|-----------|-----------|------|-----------|-----------|-----------|
| C    | 1.319547  | -3.043859 | -1.246822 | N    | 0.711351  | 1.882435  | 2.021701  |
| C    | 0.054746  | -3.616533 | -1.431669 | N    | 2.114642  | 2.649260  | -1.294754 |
| C    | -1.087826 | -2.821902 | -1.392084 | Li   | 1.357305  | 2.781886  | 0.474770  |
| C    | -0.928215 | -1.450838 | -1.158733 | C    | 1.784893  | 1.564239  | 2.952108  |
| C    | 0.275807  | -0.800413 | -0.935776 | H    | 1.478192  | 0.854780  | 3.751160  |
| C    | 1.375913  | -1.668510 | -1.006033 | H    | 2.634944  | 1.103147  | 2.424396  |
| O    | -2.007095 | 0.274729  | 0.766844  | H    | 2.184936  | 2.452974  | 3.487587  |
| C    | -2.521857 | 0.173302  | -0.353033 | C    | -0.364899 | 2.520520  | 2.767162  |
| O    | -2.144467 | -0.716026 | -1.287646 | H    | -0.047446 | 3.448121  | 3.291672  |
| N    | -3.569702 | 0.938252  | -0.758777 | H    | -1.192179 | 2.793231  | 2.096579  |
| C    | -4.181293 | 1.873995  | 0.173659  | H    | -0.797335 | 1.869408  | 3.559200  |
| C    | -4.220188 | 0.799115  | -2.054815 | C    | 3.538503  | 2.941346  | -1.379852 |
| H    | -0.030847 | -4.683457 | -1.619579 | H    | 4.094203  | 2.399971  | -0.599101 |
| H    | 2.207430  | -3.665633 | -1.301590 | H    | 3.988394  | 2.653137  | -2.354765 |
| H    | -2.075542 | -3.241809 | -1.558586 | H    | 3.775874  | 4.019352  | -1.254426 |
| H    | -3.621479 | 0.169840  | -2.708691 | C    | 1.418014  | 3.389661  | -2.338145 |
| H    | -5.219103 | 0.355256  | -1.943126 | H    | 0.337141  | 3.185034  | -2.303973 |
| H    | -4.333738 | 1.788653  | -2.513210 | H    | 1.542390  | 4.490621  | -2.255436 |
| H    | -4.225263 | 2.873248  | -0.276076 | H    | 1.760957  | 3.131330  | -3.363244 |
| H    | -5.204920 | 1.559933  | 0.419195  | O    | 0.011028  | -1.399750 | 2.468171  |
| H    | -3.588011 | 1.913004  | 1.085236  | C    | 1.237780  | -2.089640 | 2.662489  |
| O    | 2.600187  | -0.985632 | -0.836219 | H    | 1.302588  | -2.483318 | 3.686955  |
| C    | 3.818479  | -1.673278 | -1.086420 | H    | 1.337629  | -2.917412 | 1.946915  |
| H    | 3.838272  | -2.093518 | -2.100060 | H    | 2.040853  | -1.368562 | 2.502997  |
| H    | 4.614486  | -0.933970 | -0.980436 | C    | -1.122159 | -2.235200 | 2.674033  |
| H    | 3.974339  | -2.479493 | -0.358857 | H    | -1.140948 | -2.608489 | 3.707976  |
| Li   | -0.133748 | 0.210279  | 1.228619  | H    | -2.004143 | -1.623414 | 2.483342  |
| Li   | 1.651368  | 0.766692  | -1.261608 | H    | -1.111169 | -3.086763 | 1.979797  |

**Table 5 (Continued).**

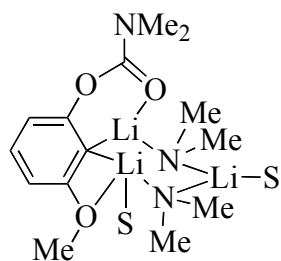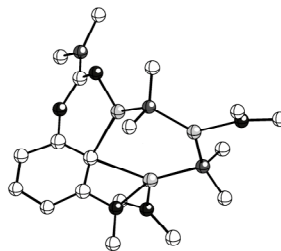

**A11**  
 $G^\circ = -1270.211974$   
 See pg S76  
 S = Me<sub>2</sub>O

| Atom | X         | Y         | Z         | Atom | X         | Y         | Z         |
|------|-----------|-----------|-----------|------|-----------|-----------|-----------|
| C    | 1.936956  | -2.259988 | -2.440031 | H    | -1.662997 | -0.113248 | -2.740092 |
| C    | 3.215454  | -1.699748 | -2.553461 | H    | -2.798019 | 1.153139  | -3.262467 |
| C    | 3.584783  | -0.627697 | -1.748544 | C    | -1.884382 | 2.983331  | -1.526577 |
| C    | 2.638447  | -0.137773 | -0.839892 | H    | -2.864261 | 3.288938  | -1.958237 |
| C    | 1.347302  | -0.613645 | -0.665174 | H    | -1.819529 | 3.443995  | -0.529557 |
| C    | 1.056298  | -1.698305 | -1.511538 | H    | -1.121532 | 3.486765  | -2.161831 |
| O    | 1.458130  | 2.354649  | -0.273224 | C    | -3.099478 | -1.862873 | 1.279560  |
| C    | 2.519243  | 2.018234  | 0.266189  | H    | -3.216780 | -2.250190 | 0.255640  |
| O    | 3.179254  | 0.876008  | 0.016186  | H    | -2.865586 | -2.739932 | 1.927791  |
| N    | 3.158207  | 2.796928  | 1.181253  | H    | -4.110516 | -1.536491 | 1.613296  |
| C    | 2.627798  | 4.115015  | 1.497624  | C    | -1.966345 | -0.341480 | 2.684883  |
| C    | 4.445579  | 2.461344  | 1.772548  | H    | -1.211207 | 0.456619  | 2.747872  |
| H    | 3.920705  | -2.109457 | -3.271649 | H    | -2.906852 | 0.077076  | 3.113280  |
| H    | 1.663092  | -3.102003 | -3.067148 | H    | -1.657448 | -1.132604 | 3.405980  |
| H    | 4.574360  | -0.184703 | -1.809950 | O    | 0.692756  | -2.671198 | 1.861926  |
| H    | 4.697828  | 1.425610  | 1.559170  | C    | 2.073889  | -2.540943 | 2.177502  |
| H    | 5.237315  | 3.112669  | 1.376824  | H    | 2.206007  | -2.303483 | 3.243229  |
| H    | 4.396373  | 2.603294  | 2.858903  | H    | 2.614275  | -3.470697 | 1.948750  |
| H    | 2.504385  | 4.217987  | 2.582685  | H    | 2.464003  | -1.730618 | 1.561962  |
| H    | 3.314482  | 4.899203  | 1.151158  | C    | 0.060167  | -3.700535 | 2.608947  |
| H    | 1.663867  | 4.240886  | 1.008476  | H    | -0.989402 | -3.717598 | 2.313149  |
| O    | -0.233429 | -2.206903 | -1.305971 | H    | 0.521910  | -4.676036 | 2.396459  |
| C    | -0.652888 | -3.348804 | -2.036352 | H    | 0.127419  | -3.500927 | 3.687830  |
| H    | -0.003451 | -4.212480 | -1.841130 | O    | -4.573749 | 1.157706  | 0.147830  |
| H    | -1.666447 | -3.571162 | -1.697119 | C    | -5.407371 | 1.155956  | 1.297264  |
| H    | -0.668222 | -3.145284 | -3.114311 | H    | -5.745508 | 2.175469  | 1.533669  |
| Li   | 0.099583  | 1.151592  | -0.795844 | H    | -6.286843 | 0.514277  | 1.143696  |
| Li   | -0.329169 | -1.397671 | 0.625584  | H    | -4.814279 | 0.764057  | 2.124355  |
| N    | -1.706827 | 1.544038  | -1.439885 | C    | -5.232063 | 1.647162  | -1.014313 |
| N    | -2.096876 | -0.814455 | 1.318902  | H    | -4.501043 | 1.625662  | -1.822194 |
| Li   | -2.648485 | 0.586012  | 0.001694  | H    | -6.094038 | 1.012608  | -1.267348 |
| C    | -1.811706 | 0.975640  | -2.773286 | H    | -5.578554 | 2.678837  | -0.861082 |
| H    | -1.064606 | 1.383000  | -3.492322 |      |           |           |           |

**Table 5 (Continued).**

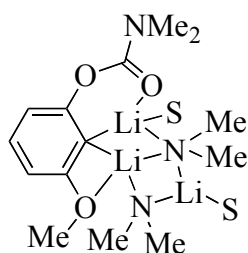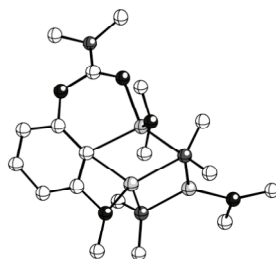

**A12**  
 $G^\circ = -1270.212974$   
 See pg S76  
 $S = \text{Me}_2\text{O}$

| Atom | X         | Y         | Z         | Atom | X         | Y         | Z         |
|------|-----------|-----------|-----------|------|-----------|-----------|-----------|
| C    | -2.194676 | -3.179667 | -0.889861 | H    | 1.921139  | -1.371644 | 2.255732  |
| C    | -3.416135 | -2.643362 | -1.317700 | H    | 2.943640  | -0.010030 | 2.760944  |
| C    | -3.596581 | -1.264706 | -1.373997 | C    | 1.450024  | 1.859071  | 1.564635  |
| C    | -2.522411 | -0.449839 | -0.994718 | H    | 2.453317  | 2.257185  | 1.844687  |
| C    | -1.286990 | -0.886848 | -0.548754 | H    | 1.106411  | 2.436849  | 0.695213  |
| C    | -1.187014 | -2.285305 | -0.517713 | H    | 0.790612  | 2.139156  | 2.416263  |
| O    | -1.821352 | 1.748290  | 0.695108  | C    | 3.214880  | -1.937020 | -1.845814 |
| C    | -2.328974 | 1.911995  | -0.422460 | H    | 3.419281  | -2.453758 | -0.894240 |
| O    | -2.794387 | 0.938477  | -1.216120 | H    | 2.622771  | -2.641298 | -2.472796 |
| N    | -2.505999 | 3.146918  | -0.972309 | H    | 4.195617  | -1.842307 | -2.368969 |
| C    | -2.191661 | 4.334168  | -0.193207 | C    | 2.308060  | -0.025184 | -2.885845 |
| C    | -3.150349 | 3.371884  | -2.258949 | H    | 1.796514  | 0.939169  | -2.742525 |
| H    | -4.223188 | -3.309455 | -1.611597 | H    | 3.237110  | 0.189793  | -3.465070 |
| H    | -2.061324 | -4.256427 | -0.857012 | H    | 1.671293  | -0.624904 | -3.572800 |
| H    | -4.530636 | -0.827619 | -1.715114 | O    | -1.501772 | -0.441453 | 2.865516  |
| H    | -3.189269 | 2.444568  | -2.825196 | C    | -2.728022 | 0.126333  | 3.309612  |
| H    | -4.171960 | 3.755667  | -2.126710 | H    | -3.581238 | -0.336054 | 2.793836  |
| H    | -2.575610 | 4.114266  | -2.824959 | H    | -2.843734 | -0.009513 | 4.394494  |
| H    | -1.532945 | 4.995620  | -0.769035 | H    | -2.694715 | 1.188809  | 3.067804  |
| H    | -3.107111 | 4.889735  | 0.054077  | C    | -1.439710 | -1.845011 | 3.092699  |
| H    | -1.691733 | 4.037607  | 0.726821  | H    | -0.483156 | -2.192089 | 2.700786  |
| O    | 0.068398  | -2.722046 | -0.058158 | H    | -1.502382 | -2.064127 | 4.168221  |
| C    | 0.432589  | -4.079603 | -0.261107 | H    | -2.253985 | -2.361204 | 2.566299  |
| H    | 0.323522  | -4.366646 | -1.314334 | O    | 4.817109  | 1.062269  | 0.141706  |
| H    | 1.481176  | -4.163170 | 0.030122  | C    | 5.624546  | 0.889457  | -1.023369 |
| H    | -0.171328 | -4.753968 | 0.360724  | H    | 5.966033  | 1.862956  | -1.401503 |
| Li   | -0.645033 | 0.291474  | 1.172741  | H    | 6.497751  | 0.262737  | -0.795969 |
| Li   | 0.911728  | -0.773280 | -0.462660 | H    | 4.992227  | 0.395713  | -1.762055 |
| N    | 1.447061  | 0.430997  | 1.265256  | C    | 5.512076  | 1.672530  | 1.220696  |
| N    | 2.552167  | -0.671594 | -1.611748 | H    | 6.373950  | 1.061294  | 1.523147  |
| Li   | 3.002695  | 0.347232  | -0.032892 | H    | 5.863611  | 2.675364  | 0.940642  |
| C    | 1.910912  | -0.288499 | 2.445706  | H    | 4.811206  | 1.752448  | 2.053499  |
| H    | 1.279020  | -0.121907 | 3.343085  |      |           |           |           |

**Table 5 (Continued).**

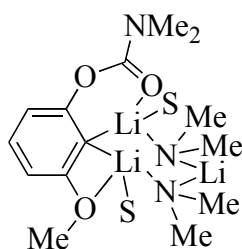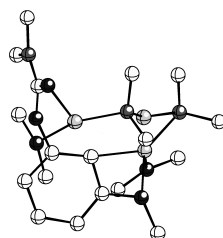

**A13**  
 $G^\circ = -1270.209295$   
 See pg S76  
 $S = \text{Me}_2\text{O}$

| Atom | X         | Y         | Z         | Atom | X         | Y         | Z         |
|------|-----------|-----------|-----------|------|-----------|-----------|-----------|
| C    | 0.229621  | -1.944379 | -2.494973 | H    | -0.696164 | -3.241994 | 1.215646  |
| C    | -0.650851 | -1.156924 | -3.250484 | H    | -0.593039 | -3.238250 | 2.989269  |
| C    | -0.994457 | 0.121585  | -2.819551 | C    | -1.852384 | -0.911860 | 3.298346  |
| C    | -0.437627 | 0.575494  | -1.617245 | H    | -1.298326 | -1.194405 | 4.220992  |
| C    | 0.428698  | -0.128960 | -0.795628 | H    | -1.919960 | 0.186201  | 3.289718  |
| C    | 0.732730  | -1.404574 | -1.305631 | H    | -2.887405 | -1.296877 | 3.451367  |
| O    | -2.140062 | 1.360671  | 0.390765  | C    | 3.169358  | -1.034906 | 2.875484  |
| C    | -1.497604 | 2.213851  | -0.235083 | H    | 3.107662  | -2.028923 | 2.406735  |
| O    | -0.736797 | 1.943506  | -1.308700 | H    | 4.253576  | -0.779179 | 2.941547  |
| N    | -1.516096 | 3.534231  | 0.081231  | H    | 2.838077  | -1.155978 | 3.930528  |
| C    | -2.356416 | 4.005326  | 1.172000  | C    | 2.479693  | 1.220736  | 2.781365  |
| C    | -0.780173 | 4.551650  | -0.655962 | H    | 1.891780  | 1.974856  | 2.233837  |
| H    | -1.057611 | -1.545614 | -4.180403 | H    | 2.105047  | 1.219238  | 3.829239  |
| H    | 0.507165  | -2.931844 | -2.850763 | H    | 3.520279  | 1.617387  | 2.848412  |
| H    | -1.663862 | 0.753848  | -3.395387 | O    | 3.914829  | 0.573833  | -0.837321 |
| H    | -0.110591 | 4.081674  | -1.371995 | C    | 3.948418  | 0.958846  | -2.204152 |
| H    | -1.471158 | 5.217246  | -1.191257 | H    | 4.095815  | 2.044003  | -2.299711 |
| H    | -0.191768 | 5.157704  | 0.043616  | H    | 4.757308  | 0.439251  | -2.737118 |
| H    | -1.749787 | 4.558124  | 1.899510  | H    | 2.985415  | 0.682235  | -2.637211 |
| H    | -3.139418 | 4.675578  | 0.792516  | C    | 5.101449  | 0.899219  | -0.119500 |
| H    | -2.817449 | 3.151182  | 1.663976  | H    | 4.930171  | 0.598025  | 0.915053  |
| O    | 1.659635  | -2.081369 | -0.503564 | H    | 5.964958  | 0.359651  | -0.533226 |
| C    | 2.105736  | -3.370947 | -0.895297 | H    | 5.296260  | 1.979803  | -0.162831 |
| H    | 2.601136  | -3.344936 | -1.875102 | O    | -3.528969 | -1.284109 | -0.480005 |
| H    | 2.820358  | -3.688455 | -0.134038 | C    | -4.768217 | -0.850053 | 0.069852  |
| H    | 1.272891  | -4.084682 | -0.930931 | H    | -5.578359 | -0.972903 | -0.662597 |
| Li   | -1.933317 | -0.537631 | 0.479698  | H    | -5.014121 | -1.413302 | 0.980864  |
| Li   | 2.389592  | -0.076876 | 0.195153  | H    | -4.652330 | 0.208065  | 0.311548  |
| N    | -1.230481 | -1.395378 | 2.078742  | C    | -3.541576 | -2.656876 | -0.856219 |
| N    | 2.388091  | -0.070070 | 2.129415  | H    | -2.566270 | -2.875058 | -1.294855 |
| Li   | 0.531199  | -0.614627 | 1.701612  | H    | -3.708658 | -3.302856 | 0.016171  |
| C    | -1.172171 | -2.842748 | 2.124872  | H    | -4.325778 | -2.841853 | -1.603773 |
| H    | -2.173309 | -3.328180 | 2.202990  |      |           |           |           |

**Table 5 (Continued).**

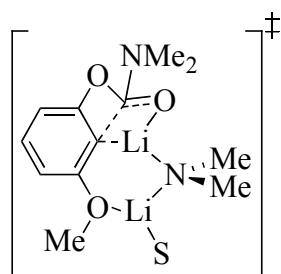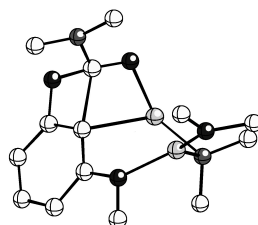

**A14**  
 $G^\circ = -973.117585$   
 See pg S78  
 $S = \text{Me}_2\text{O}$

| Atom | X         | Y         | Z         | Atom | X         | Y         | Z         |
|------|-----------|-----------|-----------|------|-----------|-----------|-----------|
| C    | 1.614050  | -2.335510 | -1.242218 | H    | 2.654885  | 3.462665  | -1.381485 |
| C    | 2.904934  | -2.449544 | -0.710876 | H    | 3.405882  | 1.958052  | -0.821141 |
| C    | 3.449968  | -1.481716 | 0.139873  | H    | 1.955508  | 1.891976  | -1.858468 |
| C    | 2.617649  | -0.402353 | 0.422991  | H    | -0.272773 | 2.861387  | -0.707873 |
| C    | 1.321319  | -0.238541 | -0.056556 | H    | -0.059119 | 3.370554  | 0.991913  |
| C    | 0.828761  | -1.214595 | -0.912609 | H    | 0.704824  | 4.298945  | -0.323657 |
| O    | 2.868658  | 0.714336  | 1.156989  | H    | -3.802387 | -0.996271 | 2.410959  |
| C    | 1.497028  | 1.333315  | 0.937841  | H    | -2.622212 | -0.993368 | 3.721722  |
| O    | 0.748948  | 1.384899  | 1.963387  | H    | -2.816982 | 0.455502  | 2.716215  |
| Li   | -0.039670 | -0.227032 | 2.073230  | H    | -0.927161 | -2.921262 | 1.090528  |
| N    | -1.751143 | -1.094243 | 1.756843  | H    | -1.500631 | -2.979045 | 2.768566  |
| Li   | -1.729529 | -0.391260 | -0.045565 | H    | -2.668879 | -3.019777 | 1.444817  |
| O    | -3.056433 | 0.672515  | -0.976577 | H    | -1.792041 | 1.196823  | -2.481235 |
| C    | -2.781959 | 1.480119  | -2.119856 | H    | -3.530184 | 1.303337  | -2.904170 |
| C    | -4.325608 | 0.955966  | -0.385197 | H    | -2.783459 | 2.544379  | -1.850884 |
| C    | -2.780992 | -0.643321 | 2.680217  | H    | -4.377427 | 2.006425  | -0.070737 |
| C    | -1.712562 | -2.551255 | 1.766141  | H    | -4.425346 | 0.308102  | 0.486564  |
| N    | 1.644585  | 2.501862  | 0.164208  | H    | -5.134315 | 0.749371  | -1.098534 |
| C    | 2.454011  | 2.441551  | -1.040111 | O    | -0.478060 | -1.045927 | -1.408825 |
| C    | 0.436745  | 3.295703  | 0.024880  | C    | -0.950129 | -1.973915 | -2.386769 |
| H    | 1.244859  | -3.118211 | -1.895246 | H    | -1.942188 | -1.625482 | -2.682142 |
| H    | 4.457095  | -1.563846 | 0.535204  | H    | -0.289469 | -1.984286 | -3.260179 |
| H    | 3.498473  | -3.321127 | -0.975434 | H    | -1.027645 | -2.985305 | -1.971954 |

**Table 5 (Continued).**

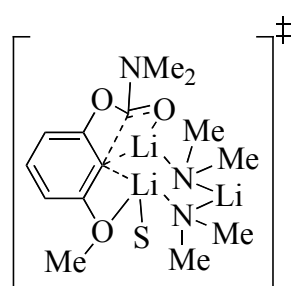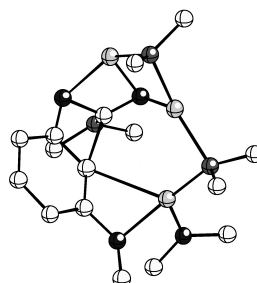

**A15**  
 $G^\circ = -1115.202413$   
 See pg S78  
 S = Me<sub>2</sub>O

| Atom | X         | Y         | Z         | Atom | X         | Y         | Z         |
|------|-----------|-----------|-----------|------|-----------|-----------|-----------|
| C    | -0.199747 | -2.300179 | 2.451583  | N    | -3.409306 | 1.277884  | -0.319043 |
| C    | -1.316982 | -3.039992 | 2.047620  | N    | 0.149885  | 2.393275  | 0.735659  |
| C    | -1.835515 | -2.933770 | 0.752527  | Li   | -1.416241 | 1.611630  | -0.192468 |
| C    | -1.161124 | -2.055137 | -0.085763 | C    | -4.099993 | 1.002030  | 0.929090  |
| C    | -0.043201 | -1.306853 | 0.227060  | H    | -3.644722 | 0.141597  | 1.441310  |
| C    | 0.422827  | -1.438791 | 1.532736  | H    | -4.072077 | 1.854524  | 1.641689  |
| O    | -0.877865 | 0.426859  | -1.791371 | H    | -5.177089 | 0.765317  | 0.793380  |
| C    | -0.442918 | -0.756837 | -1.702161 | C    | -4.047253 | 2.411680  | -0.970919 |
| O    | -1.506771 | -1.760752 | -1.408685 | H    | -5.119631 | 2.241116  | -1.206265 |
| N    | 0.478092  | -1.244423 | -2.606075 | H    | -4.023628 | 3.340081  | -0.359008 |
| C    | 1.404548  | -0.267777 | -3.166760 | H    | -3.547022 | 2.646258  | -1.924564 |
| C    | 1.021421  | -2.580402 | -2.416166 | C    | -0.109466 | 2.682932  | 2.137523  |
| H    | -1.792756 | -3.706224 | 2.762018  | H    | -0.364672 | 1.761793  | 2.682644  |
| H    | 0.162447  | -2.402626 | 3.468823  | H    | 0.757565  | 3.143718  | 2.662973  |
| H    | -2.705958 | -3.498420 | 0.433723  | H    | -0.955180 | 3.386762  | 2.293529  |
| H    | 1.757779  | -2.608783 | -1.597512 | C    | 0.448984  | 3.640702  | 0.054210  |
| H    | 0.217566  | -3.280140 | -2.188983 | H    | 0.624541  | 3.467318  | -1.019313 |
| H    | 1.506484  | -2.895940 | -3.344663 | H    | -0.369318 | 4.391345  | 0.124722  |
| H    | 1.846133  | -0.686085 | -4.076273 | H    | 1.349378  | 4.164164  | 0.450974  |
| H    | 0.860484  | 0.642884  | -3.415282 | O    | 3.182616  | 0.938300  | -0.159857 |
| H    | 2.214198  | -0.016747 | -2.463270 | C    | 4.115991  | -0.134533 | -0.086132 |
| O    | 1.526221  | -0.645708 | 1.862720  | H    | 4.477229  | -0.405635 | -1.087898 |
| C    | 1.929701  | -0.567019 | 3.228108  | H    | 4.975165  | 0.143245  | 0.540168  |
| H    | 2.301683  | -1.534999 | 3.583651  | H    | 3.593522  | -0.980065 | 0.362005  |
| H    | 2.735869  | 0.167924  | 3.263174  | C    | 3.754052  | 2.131380  | -0.693012 |
| H    | 1.102370  | -0.233776 | 3.864300  | H    | 2.974897  | 2.893220  | -0.681643 |
| Li   | -2.734034 | -0.096516 | -1.424814 | H    | 4.601033  | 2.461186  | -0.076248 |
| Li   | 1.296933  | 0.847720  | 0.504206  | H    | 4.101464  | 1.967141  | -1.722423 |



Table 5 (Continued).

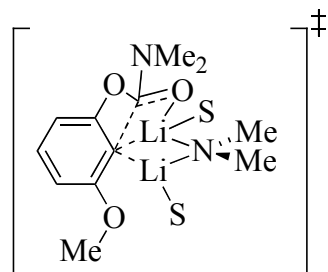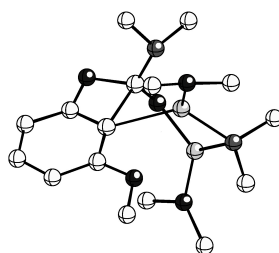

**A16**  
 $G^\circ = -1128.087599$   
 See pg S78  
 S = Me<sub>2</sub>O

| Atom | X         | Y         | Z         | Atom | X         | Y         | Z         |
|------|-----------|-----------|-----------|------|-----------|-----------|-----------|
| C    | -0.185534 | 2.960308  | -1.759267 | H    | -1.963512 | 1.275710  | 3.390669  |
| C    | 0.110458  | 3.979943  | -0.846688 | H    | -2.199742 | 1.342131  | 1.628572  |
| C    | 0.313342  | 3.719411  | 0.512822  | H    | 0.149801  | -1.790173 | 3.107295  |
| C    | 0.201261  | 2.384282  | 0.887762  | H    | -0.614488 | -0.715395 | 4.303651  |
| C    | -0.098127 | 1.327006  | 0.042055  | H    | -1.614885 | -1.835485 | 3.343412  |
| C    | -0.287495 | 1.629342  | -1.305771 | H    | -0.722078 | -4.221367 | 0.153328  |
| O    | 0.378047  | 1.864399  | 2.146241  | H    | 1.035567  | -4.326451 | 0.237675  |
| C    | 0.292638  | 0.442792  | 1.807014  | H    | 0.145356  | -3.421797 | 1.480827  |
| O    | 1.361611  | -0.208668 | 1.847591  | H    | 0.475242  | -1.818015 | -2.372260 |
| Li   | 1.736207  | -1.261791 | 0.356878  | H    | 1.238054  | -3.389478 | -2.017678 |
| N    | 0.301329  | -2.391205 | -0.355393 | H    | -0.517365 | -3.274964 | -2.141096 |
| Li   | -0.944295 | -0.889555 | 0.061070  | H    | -2.667582 | -3.079156 | -0.257738 |
| O    | -2.893482 | -1.062724 | -0.371799 | H    | -4.372768 | -2.527507 | -0.325661 |
| C    | -3.356473 | -2.365918 | -0.711803 | H    | -3.356560 | -2.507542 | -1.801309 |
| C    | -3.674663 | -0.029348 | -0.958318 | H    | -3.687497 | -0.123847 | -2.052771 |
| C    | 0.186958  | -3.624583 | 0.401485  | H    | -4.706441 | -0.063319 | -0.581116 |
| C    | 0.377584  | -2.727218 | -1.765062 | H    | -3.212550 | 0.919860  | -0.684363 |
| O    | 3.550585  | -0.911052 | -0.223143 | H    | 3.645626  | 0.561361  | 1.167479  |
| C    | 4.254920  | 0.196634  | 0.340025  | H    | 5.241561  | -0.122088 | 0.702739  |
| C    | 4.193751  | -1.475077 | -1.358404 | H    | 4.310230  | -0.724141 | -2.152277 |
| N    | -0.909067 | -0.192584 | 2.249831  | H    | 5.183132  | -1.869709 | -1.088855 |
| C    | -2.067714 | 0.670842  | 2.479186  | H    | 3.559891  | -2.288467 | -1.717070 |
| C    | -0.732276 | -1.188366 | 3.315975  | O    | -0.603475 | 0.565185  | -2.134176 |
| H    | 4.381229  | 0.990242  | -0.408841 | C    | -0.743847 | 0.808707  | -3.523384 |
| H    | -0.336299 | 3.213526  | -2.803229 | H    | -1.583205 | 1.485393  | -3.735194 |
| H    | 0.550153  | 4.505809  | 1.222139  | H    | 0.172399  | 1.235971  | -3.951673 |
| H    | 0.185310  | 5.001702  | -1.211148 | H    | -0.936931 | -0.162550 | -3.983394 |
| H    | -2.958221 | 0.040637  | 2.569499  |      |           |           |           |

**Table 5 (Continued).**

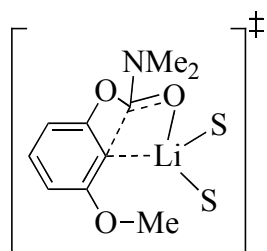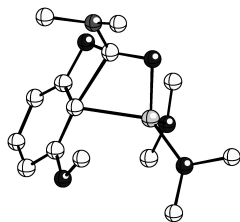

**A17**  
 $G^\circ = -986.010498$   
 See pg S78  
 S = Me<sub>2</sub>O

| Atom | X         | Y         | Z         | Atom | X         | Y         | Z         |
|------|-----------|-----------|-----------|------|-----------|-----------|-----------|
| C    | 0.430940  | 0.561780  | 1.877742  | H    | 3.741782  | 0.490232  | -0.671172 |
| C    | 0.829180  | 0.338171  | 0.560453  | H    | 3.556768  | -0.668249 | 0.670555  |
| C    | 1.151782  | 1.459094  | -0.205869 | H    | 4.575376  | -1.074223 | -0.737492 |
| C    | 1.086720  | 2.779744  | 0.220406  | H    | -3.027102 | 1.669356  | 0.246174  |
| C    | 0.656044  | 2.960566  | 1.547490  | H    | -1.941909 | 2.878892  | -0.493745 |
| C    | 0.328628  | 1.884207  | 2.368547  | H    | -3.528159 | 2.508773  | -1.249107 |
| O    | 1.533714  | 0.980842  | -1.427606 | H    | -2.431507 | 1.766409  | -3.350518 |
| C    | 1.305297  | -0.481061 | -1.131522 | H    | -0.887416 | 2.290564  | -2.596302 |
| O    | 0.307807  | -1.017290 | -1.705009 | H    | -1.063323 | 0.609910  | -3.151363 |
| Li   | -1.003204 | -0.397217 | -0.578591 | H    | -3.166804 | -3.468436 | -0.216938 |
| O    | -2.076150 | 1.028110  | -1.437741 | H    | -3.922465 | -2.022672 | -0.958047 |
| C    | -1.590446 | 1.457717  | -2.714748 | H    | -2.329523 | -2.602620 | -1.539009 |
| C    | -2.674603 | 2.088541  | -0.699161 | H    | -2.315001 | -0.855633 | 2.125795  |
| O    | -2.266239 | -1.654012 | 0.257154  | H    | -3.906531 | -0.877288 | 1.288143  |
| C    | -2.974842 | -1.430682 | 1.473394  | H    | -3.218578 | -2.387595 | 1.954475  |
| C    | -2.970118 | -2.484175 | -0.662766 | O    | 0.087308  | -0.426237 | 2.775167  |
| N    | 2.533746  | -1.151109 | -1.136817 | C    | 0.511926  | -1.747899 | 2.462772  |
| C    | 3.656552  | -0.567515 | -0.423591 | H    | 0.239665  | -2.361245 | 3.325726  |
| C    | 2.463214  | -2.601780 | -1.060242 | H    | 0.016501  | -2.134994 | 1.565055  |
| H    | 1.367643  | 3.616439  | -0.411736 | H    | 1.597252  | -1.786625 | 2.310804  |
| H    | 0.588493  | 3.968573  | 1.950727  | H    | 2.306387  | -2.963154 | -0.028205 |
| H    | 0.020652  | 2.040020  | 3.398740  | H    | 3.404737  | -3.024888 | -1.427374 |
| H    | 1.643286  | -2.953679 | -1.684851 |      |           |           |           |

**Table 5 (Continued).**

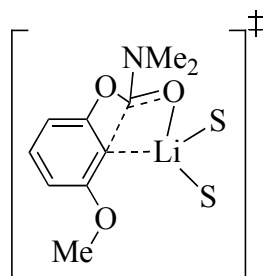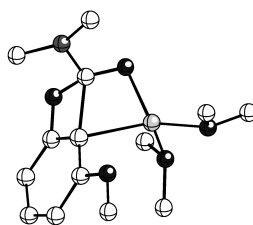

**A18**  
 $G^\circ = -986.010510$   
 See pg S78  
 S = Me<sub>2</sub>O

| Atom | X         | Y         | Z         | Atom | X         | Y         | Z         |
|------|-----------|-----------|-----------|------|-----------|-----------|-----------|
| C    | -0.862353 | -1.000804 | 1.340371  | H    | -1.676612 | 4.326281  | 0.289417  |
| C    | -0.932514 | -0.174669 | 0.220081  | H    | -0.814157 | 3.129883  | 1.290367  |
| C    | -1.624580 | -0.639694 | -0.891378 | H    | -3.510769 | 1.398312  | -0.731229 |
| C    | -2.221403 | -1.893423 | -1.003104 | H    | -3.003519 | 1.609720  | 0.966246  |
| C    | -2.105564 | -2.708462 | 0.130467  | H    | -3.607004 | 2.999659  | 0.023446  |
| C    | -1.442859 | -2.288241 | 1.290151  | H    | 2.371029  | -2.436386 | -0.155741 |
| O    | -1.616487 | 0.387489  | -1.788388 | H    | 0.938772  | -2.938457 | -1.103117 |
| C    | -0.840659 | 1.351067  | -0.913915 | H    | 2.583879  | -3.095044 | -1.803357 |
| O    | 0.335384  | 1.630083  | -1.301181 | H    | 2.041330  | -1.538738 | -3.682840 |
| Li   | 1.206991  | 0.278515  | -0.439342 | H    | 0.367683  | -1.598825 | -3.035497 |
| O    | 1.856695  | -1.149713 | -1.646503 | H    | 1.185166  | -0.026523 | -3.204496 |
| C    | 1.333185  | -1.082305 | -2.977794 | H    | 3.933544  | 2.043357  | -0.292369 |
| C    | 1.936943  | -2.485621 | -1.157125 | H    | 4.831000  | 0.829193  | 0.672824  |
| O    | 2.758516  | 0.643467  | 0.713724  | H    | 4.020590  | 0.343849  | -0.848514 |
| C    | 2.537390  | 1.433952  | 1.882345  | H    | 1.599740  | 1.087978  | 2.318934  |
| C    | 3.957361  | 0.992447  | 0.027058  | H    | 3.360547  | 1.293270  | 2.596468  |
| N    | -1.687889 | 2.401418  | -0.516495 | H    | 2.461023  | 2.498074  | 1.621160  |
| C    | -3.020200 | 2.076616  | -0.033341 | O    | -0.195760 | -0.517050 | 2.449558  |
| C    | -1.026740 | 3.445520  | 0.251685  | C    | -0.154091 | -1.325943 | 3.612995  |
| H    | -2.763199 | -2.211438 | -1.888331 | H    | 0.381726  | -0.745019 | 4.367177  |
| H    | -2.552678 | -3.700048 | 0.119708  | H    | -1.162236 | -1.553510 | 3.983325  |
| H    | -1.394835 | -2.961619 | 2.138978  | H    | 0.382463  | -2.268518 | 3.437649  |
| H    | -0.089517 | 3.712228  | -0.235370 |      |           |           |           |

**Table 5 (Continued).**

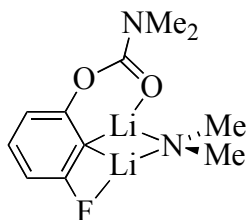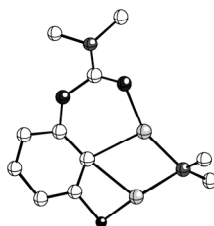

**A19**  
 $G^\circ = -802.947297$   
 See pg S81

| Atom | X         | Y         | Z         | Atom | X         | Y         | Z         |
|------|-----------|-----------|-----------|------|-----------|-----------|-----------|
| C    | -1.980240 | 3.037104  | -0.108775 | C    | 4.144269  | 0.244636  | 0.738974  |
| C    | -0.738046 | 3.641279  | -0.318432 | H    | -0.677950 | 4.703311  | -0.537063 |
| C    | 0.425203  | 2.875906  | -0.238279 | H    | -2.911365 | 3.592547  | -0.150392 |
| C    | 0.319313  | 1.511535  | 0.050122  | H    | 1.402459  | 3.324994  | -0.387070 |
| C    | -0.875190 | 0.819638  | 0.259407  | H    | -3.471727 | -2.005417 | -1.513292 |
| C    | -1.952904 | 1.678053  | 0.157254  | H    | -2.700834 | -3.604923 | -1.547319 |
| F    | -3.231253 | 1.075476  | 0.382153  | H    | -4.018923 | -3.286991 | -0.412395 |
| Li   | -2.478072 | -0.614815 | 0.846838  | H    | 3.614480  | 1.092182  | 1.166123  |
| O    | 1.178152  | -1.052735 | -0.890017 | H    | 4.646452  | -0.306511 | 1.542375  |
| Li   | -0.623223 | -1.264466 | -0.501205 | H    | 4.909710  | 0.611254  | 0.041698  |
| N    | -2.158200 | -2.341376 | 0.106100  | H    | 4.535182  | -1.728153 | -1.174389 |
| C    | -1.726586 | -3.453079 | 0.939649  | H    | 4.199138  | -2.458946 | 0.413991  |
| C    | -3.118874 | -2.827923 | -0.872371 | H    | 2.957422  | -2.498237 | -0.866257 |
| C    | 1.931278  | -0.305702 | -0.247266 | H    | -0.994405 | -3.115947 | 1.690807  |
| O    | 1.600685  | 0.908141  | 0.218701  | H    | -2.557677 | -3.933576 | 1.497529  |
| N    | 3.210433  | -0.642783 | 0.056612  | H    | -1.244176 | -4.271797 | 0.363648  |
| C    | 3.755284  | -1.906341 | -0.422405 |      |           |           |           |

Table 5 (Continued).

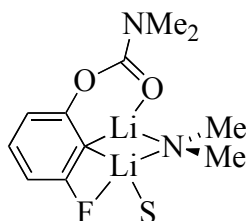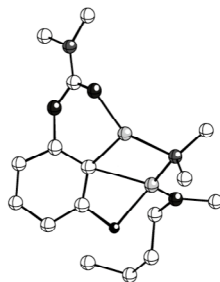

**A20**  
 $G^\circ = -1075.788321$   
 $S = n\text{-BuOMe}$

| Atom | X         | Y         | Z         | Atom | X         | Y         | Z         |
|------|-----------|-----------|-----------|------|-----------|-----------|-----------|
| C    | 0.955631  | -2.158682 | 2.084912  | H    | -1.922320 | -3.564231 | 0.919340  |
| C    | -0.022199 | -3.133119 | 1.866414  | H    | 0.471784  | 2.749845  | 2.896238  |
| C    | -1.149392 | -2.824173 | 1.104406  | H    | 1.097156  | 4.184876  | 2.056286  |
| C    | -1.266709 | -1.535563 | 0.574429  | H    | -0.587807 | 4.142956  | 2.589853  |
| C    | -0.346459 | -0.501575 | 0.739823  | H    | -1.334565 | 4.583214  | 0.256645  |
| C    | 0.720764  | -0.915714 | 1.513805  | H    | 0.346479  | 4.625747  | -0.279280 |
| F    | 1.723378  | 0.059997  | 1.739289  | H    | -0.792244 | 3.488077  | -1.033687 |
| Li   | -1.413973 | 1.392561  | 0.942867  | H    | -3.609928 | -2.253321 | -1.939840 |
| O    | -3.080922 | 0.655247  | 0.509048  | H    | -5.365749 | -2.105126 | -1.678352 |
| C    | -3.215642 | -0.320892 | -0.242686 | H    | -4.592159 | -1.250844 | -3.032913 |
| O    | -2.417264 | -1.399808 | -0.260953 | H    | -5.311316 | 1.002526  | -2.257888 |
| N    | -4.223934 | -0.410422 | -1.149813 | H    | -6.201046 | 0.278522  | -0.896459 |
| C    | -5.220403 | 0.648956  | -1.223786 | H    | -4.916104 | 1.474005  | -0.582985 |
| C    | -4.457111 | -1.574440 | -1.993952 | H    | 2.240766  | 3.401346  | -1.137535 |
| Li   | 0.960174  | 1.373957  | 0.372091  | H    | 2.907511  | 2.628187  | -2.606079 |
| O    | 2.274499  | 1.375024  | -1.071540 | H    | 3.143923  | 0.290172  | -2.607130 |
| C    | 2.915676  | 0.175758  | -1.536355 | H    | 2.155633  | -0.602837 | -1.432854 |
| C    | 4.172328  | -0.176455 | -0.740385 | H    | 3.887983  | -0.294034 | 0.312431  |
| C    | 4.044678  | -2.734740 | -1.089775 | H    | 4.881602  | 0.659819  | -0.789326 |
| C    | 2.872865  | 2.592807  | -1.508645 | H    | 3.156267  | -2.731298 | -1.731424 |
| H    | 3.887996  | 2.712811  | -1.110907 | H    | 4.637619  | -3.615764 | -1.360129 |
| N    | -0.165991 | 2.890853  | 0.889886  | H    | 3.701445  | -2.865192 | -0.056396 |
| C    | -0.496826 | 3.927682  | -0.067839 | C    | 4.873791  | -1.452301 | -1.239760 |
| C    | 0.214163  | 3.513277  | 2.146319  | H    | 5.811363  | -1.565349 | -0.680734 |
| H    | 0.094387  | -4.127150 | 2.288499  | H    | 5.164419  | -1.322812 | -2.292397 |
| H    | 1.845945  | -2.355341 | 2.674052  |      |           |           |           |

**Table 5 (Continued).**

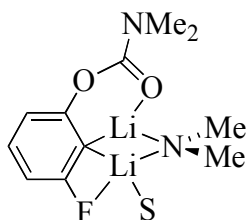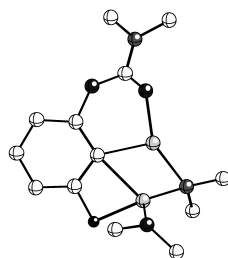

**A21**  
 $G^\circ = -957.923830$   
 See pg S79  
 $S = \text{Me}_2\text{O}$

| Atom | X         | Y         | Z         | Atom | X         | Y         | Z         |
|------|-----------|-----------|-----------|------|-----------|-----------|-----------|
| C    | -0.740073 | 3.274978  | -0.926923 | H    | -1.954606 | -2.785007 | -3.066967 |
| C    | 0.569989  | 3.724294  | -0.741461 | H    | -3.439881 | -2.345964 | -2.215341 |
| C    | 1.560499  | 2.825503  | -0.344230 | H    | 3.930833  | 0.566074  | 1.884338  |
| C    | 1.208162  | 1.488144  | -0.138584 | H    | 4.623425  | -0.974282 | 2.442581  |
| C    | -0.067578 | 0.949544  | -0.300110 | H    | 5.423709  | -0.061703 | 1.142542  |
| C    | -0.962470 | 1.923886  | -0.701427 | H    | 5.110606  | -2.303096 | -0.283306 |
| Li   | -1.958417 | -0.336977 | -0.058412 | H    | 4.244151  | -3.008462 | 1.102841  |
| O    | 1.961632  | -1.139813 | -0.939548 | H    | 3.422163  | -2.842418 | -0.472000 |
| Li   | 0.101117  | -1.070642 | -1.126281 | H    | -1.097489 | -3.225883 | 0.493774  |
| N    | -1.638178 | -1.959122 | -1.104086 | H    | -2.674776 | -3.627331 | -0.219673 |
| C    | -1.650577 | -3.257484 | -0.458213 | H    | -1.191409 | -4.063893 | -1.071036 |
| C    | -2.376752 | -2.045612 | -2.351831 | O    | -3.015533 | -0.281402 | 1.583604  |
| C    | 2.579645  | -0.527130 | -0.057007 | C    | -3.073182 | 0.856434  | 2.436400  |
| O    | 2.301214  | 0.716740  | 0.362298  | H    | -2.159494 | 1.429021  | 2.266889  |
| N    | 3.645383  | -1.063226 | 0.594563  | H    | -3.947416 | 1.479033  | 2.201302  |
| C    | 4.132738  | -2.380898 | 0.210749  | H    | -3.122921 | 0.545809  | 3.489065  |
| C    | 4.448825  | -0.336031 | 1.568653  | C    | -4.150312 | -1.134315 | 1.702244  |
| H    | 0.816665  | 4.769340  | -0.905453 | H    | -4.240047 | -1.514947 | 2.728806  |
| H    | -1.541256 | 3.939645  | -1.234396 | H    | -5.071037 | -0.597542 | 1.433853  |
| H    | 2.585417  | 3.150517  | -0.191833 | H    | -3.993707 | -1.966851 | 1.014444  |
| H    | -2.386244 | -1.072818 | -2.866714 | F    | -2.296356 | 1.484220  | -0.888152 |

**Table 5 (Continued).**

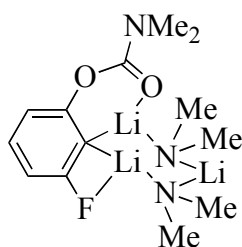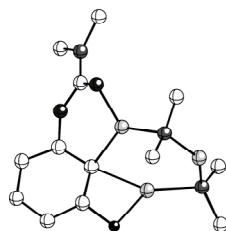

**A22**  
 $G^\circ = -945.029227$   
 See pg S77

| Atom | X         | Y         | Z         | Atom | X         | Y         | Z         |
|------|-----------|-----------|-----------|------|-----------|-----------|-----------|
| C    | -0.334318 | 3.643524  | 0.483214  | Li   | -1.809827 | 0.550562  | -1.082418 |
| C    | 1.045959  | 3.841191  | 0.565733  | N    | -1.761470 | -1.567680 | 1.732119  |
| C    | 1.918138  | 2.789387  | 0.278931  | N    | -3.048843 | -0.835604 | -1.591112 |
| C    | 1.384069  | 1.549844  | -0.082062 | Li   | -2.818224 | -1.663855 | 0.139216  |
| C    | 0.021533  | 1.253809  | -0.170157 | C    | -2.369648 | -0.750946 | 2.778806  |
| C    | -0.743733 | 2.367250  | 0.127399  | H    | -1.679520 | -0.535863 | 3.623343  |
| O    | 1.612371  | -1.070455 | 0.879897  | H    | -2.691353 | 0.220571  | 2.374714  |
| C    | 2.390590  | -0.646266 | 0.014480  | H    | -3.261779 | -1.221890 | 3.242844  |
| O    | 2.378384  | 0.609732  | -0.467723 | C    | -1.350322 | -2.842598 | 2.309236  |
| N    | 3.368363  | -1.405166 | -0.537636 | H    | -2.191996 | -3.415761 | 2.752661  |
| C    | 3.570879  | -2.770777 | -0.071355 | H    | -0.890786 | -3.485030 | 1.543397  |
| C    | 4.320013  | -0.911608 | -1.525652 | H    | -0.604442 | -2.734546 | 3.125741  |
| H    | 1.440536  | 4.813705  | 0.844780  | C    | -4.393245 | -0.341818 | -1.869860 |
| H    | -1.047943 | 4.436044  | 0.683105  | H    | -4.749470 | 0.300078  | -1.050573 |
| H    | 2.994330  | 2.925965  | 0.321839  | H    | -4.452946 | 0.260702  | -2.800681 |
| H    | 4.011221  | 0.064542  | -1.891137 | H    | -5.140897 | -1.153185 | -1.994762 |
| H    | 5.323885  | -0.832653 | -1.087633 | C    | -2.614131 | -1.675117 | -2.701911 |
| H    | 4.365733  | -1.611994 | -2.367744 | H    | -1.599057 | -2.061782 | -2.523409 |
| H    | 3.503068  | -3.468527 | -0.914695 | H    | -3.270693 | -2.554551 | -2.871062 |
| H    | 4.563927  | -2.872142 | 0.384936  | H    | -2.586419 | -1.136943 | -3.672725 |
| H    | 2.809112  | -3.016559 | 0.665809  | F    | -2.143011 | 2.174000  | 0.002247  |
| Li   | -0.193448 | -0.612211 | 1.026274  |      |           |           |           |

**Table 5 (Continued).**

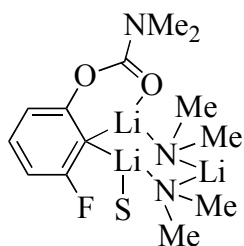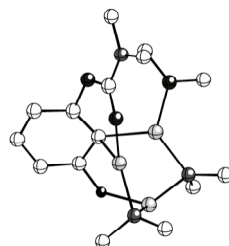

**A23**  
 $G^\circ = -1100.001665$   
 See pg S77  
 $S = \text{Me}_2\text{O}$

| Atom | X         | Y         | Z         | Atom | X         | Y         | Z         |
|------|-----------|-----------|-----------|------|-----------|-----------|-----------|
| C    | -0.744505 | -1.853916 | 2.931853  | C    | -2.379549 | -3.325173 | -0.902755 |
| C    | 0.585351  | -2.187785 | 3.199172  | H    | -1.852910 | -4.177596 | -1.385667 |
| C    | 1.603644  | -1.701160 | 2.376667  | H    | -2.141750 | -3.370463 | 0.170852  |
| C    | 1.249829  | -0.868239 | 1.313866  | H    | -3.462698 | -3.556668 | -1.002074 |
| C    | -0.042788 | -0.456085 | 0.987245  | C    | -2.339441 | -2.022868 | -2.877100 |
| C    | -0.975579 | -1.021860 | 1.842956  | H    | -3.418460 | -2.193726 | -3.081434 |
| O    | 1.615249  | -1.279583 | -1.386839 | H    | -2.080255 | -1.054394 | -3.329292 |
| C    | 2.438466  | -0.604479 | -0.754136 | H    | -1.802615 | -2.806153 | -3.455849 |
| O    | 2.365569  | -0.367274 | 0.571609  | C    | -3.671908 | 2.106445  | 0.168812  |
| N    | 3.523829  | -0.032851 | -1.331719 | H    | -3.629356 | 1.742360  | 1.206438  |
| C    | 3.766766  | -0.224788 | -2.755951 | H    | -3.591286 | 3.217084  | 0.214705  |
| C    | 4.555993  | 0.683434  | -0.593719 | H    | -4.702773 | 1.911119  | -0.200288 |
| H    | 0.825354  | -2.835450 | 4.037299  | C    | -2.747003 | 1.965204  | -2.002353 |
| H    | -1.563605 | -2.226294 | 3.538774  | H    | -1.987032 | 1.495626  | -2.644466 |
| H    | 2.643683  | -1.957753 | 2.554331  | H    | -3.733207 | 1.759748  | -2.470966 |
| H    | 4.271598  | 0.782701  | 0.450713  | H    | -2.608483 | 3.067664  | -2.094943 |
| H    | 5.510077  | 0.143676  | -0.655990 | O    | 0.110201  | 3.022029  | 0.591626  |
| H    | 4.697440  | 1.681209  | -1.026742 | C    | 1.238925  | 3.149333  | 1.448276  |
| H    | 3.911201  | 0.747671  | -3.241266 | H    | 1.995814  | 3.804538  | 0.994678  |
| H    | 4.669360  | -0.829680 | -2.912468 | H    | 0.943639  | 3.564294  | 2.422075  |
| H    | 2.913256  | -0.731046 | -3.202233 | H    | 1.652141  | 2.149063  | 1.584082  |
| Li   | -0.215527 | -1.505134 | -0.987519 | C    | -0.525735 | 4.267748  | 0.308457  |
| Li   | -0.877048 | 1.389138  | 0.181525  | H    | -1.386401 | 4.045480  | -0.322856 |
| N    | -2.014835 | -2.030376 | -1.458760 | H    | -0.862036 | 4.749568  | 1.236558  |
| N    | -2.641230 | 1.475929  | -0.639289 | H    | 0.165108  | 4.939837  | -0.218728 |
| Li   | -2.683288 | -0.486520 | -0.457285 | F    | -2.325056 | -0.731114 | 1.586007  |



**Table 5 (Continued).**

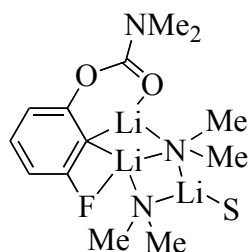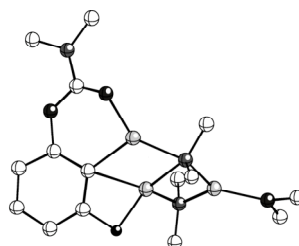

**A24**  
 $G^\circ = -1100.002591$   
 See pg S77  
 S = Me<sub>2</sub>O

| Atom | X         | Y         | Z         | Atom | X        | Y         | Z         |
|------|-----------|-----------|-----------|------|----------|-----------|-----------|
| C    | -1.583192 | 3.585892  | -0.797299 | C    | 1.598100 | -0.574296 | -2.474944 |
| C    | -2.970281 | 3.477920  | -0.665507 | H    | 0.845637 | -1.040312 | -3.151644 |
| C    | -3.542059 | 2.253756  | -0.318196 | H    | 1.555983 | 0.509787  | -2.645587 |
| C    | -2.698916 | 1.159305  | -0.103440 | H    | 2.579800 | -0.926233 | -2.859872 |
| C    | -1.309703 | 1.173459  | -0.210874 | C    | 1.462513 | -2.323309 | -0.868901 |
| C    | -0.853118 | 2.428393  | -0.570982 | H    | 0.700634 | -2.895921 | -1.443704 |
| O    | -2.226282 | -1.575138 | -0.816158 | H    | 2.437118 | -2.761409 | -1.178644 |
| C    | -3.118440 | -1.248117 | -0.016569 | H    | 1.317341 | -2.579821 | 0.190829  |
| O    | -3.420823 | 0.007875  | 0.337202  | C    | 3.041856 | 2.114572  | 1.721912  |
| N    | -3.918012 | -2.161436 | 0.593585  | H    | 3.217007 | 2.630076  | 0.766064  |
| C    | -3.775577 | -3.574470 | 0.272823  | H    | 2.406366 | 2.787035  | 2.338215  |
| C    | -5.013142 | -1.812253 | 1.489626  | H    | 4.022637 | 2.078054  | 2.250763  |
| H    | -3.602444 | 4.345273  | -0.832420 | C    | 2.217354 | 0.173908  | 2.784980  |
| H    | -1.098200 | 4.519804  | -1.062578 | H    | 1.759799 | -0.819972 | 2.653255  |
| H    | -4.617041 | 2.146140  | -0.208986 | H    | 3.145284 | 0.019563  | 3.383092  |
| H    | -4.960298 | -0.759779 | 1.755815  | H    | 1.538087 | 0.752219  | 3.448609  |
| H    | -5.981793 | -2.016446 | 1.013629  | F    | 0.546175 | 2.542246  | -0.713876 |
| H    | -4.943727 | -2.417012 | 2.401457  | O    | 4.849093 | -0.929468 | -0.149137 |
| H    | -3.637327 | -4.153585 | 1.193829  | C    | 5.723963 | -0.522687 | 0.904243  |
| H    | -4.674540 | -3.944645 | -0.237761 | H    | 5.105264 | -0.000354 | 1.635067  |
| H    | -2.912375 | -3.711400 | -0.375209 | H    | 6.200860 | -1.397900 | 1.365927  |
| Li   | -0.609794 | -0.667531 | -0.953382 | H    | 6.499435 | 0.153344  | 0.519576  |
| Li   | 0.918355  | 0.798728  | 0.257125  | C    | 5.517663 | -1.605275 | -1.206617 |
| N    | 1.383072  | -0.875627 | -1.061806 | H    | 6.272570 | -0.953382 | -1.667380 |
| N    | 2.450579  | 0.808967  | 1.501169  | H    | 6.006209 | -2.517693 | -0.838012 |
| Li   | 3.001913  | -0.372606 | 0.067016  | H    | 4.763196 | -1.871688 | -1.949156 |

Table 5 (Continued).

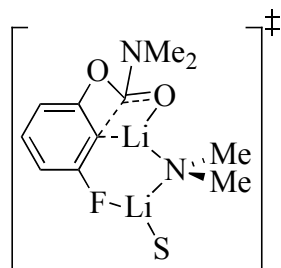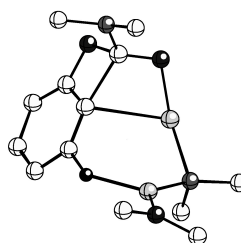

**A25**  
 $G^\circ = -957.874164$   
 See pg S79  
 $S = \text{Me}_2\text{O}$

| Atom | X         | Y         | Z         | Atom | X         | Y         | Z         |
|------|-----------|-----------|-----------|------|-----------|-----------|-----------|
| C    | 0.938724  | -2.254905 | -1.681127 | H    | 4.028884  | -2.451581 | -0.186822 |
| C    | 2.199659  | -2.750480 | -1.331889 | H    | 2.526463  | -3.695002 | -1.758538 |
| C    | 3.049842  | -2.064762 | -0.449516 | H    | 3.349947  | 3.144241  | -1.204054 |
| C    | 2.563782  | -0.863274 | 0.055944  | H    | 3.815366  | 1.460134  | -0.907039 |
| C    | 1.315048  | -0.315630 | -0.249216 | H    | 2.319642  | 1.822139  | -1.812490 |
| C    | 0.546263  | -1.037754 | -1.119472 | H    | 0.396950  | 3.012083  | -0.344441 |
| O    | 3.130237  | 0.039268  | 0.894458  | H    | 0.836587  | 3.262972  | 1.369488  |
| C    | 1.907544  | 0.969210  | 0.904058  | H    | 1.672359  | 4.177620  | 0.090129  |
| O    | 1.261788  | 1.010924  | 1.997337  | H    | -3.837473 | -0.634763 | 2.506791  |
| Li   | -0.048800 | -0.210864 | 1.888367  | H    | -2.530850 | -0.574563 | 3.689325  |
| N    | -1.868290 | -0.886628 | 1.664524  | H    | -2.772263 | 0.789685  | 2.580803  |
| Li   | -2.077919 | -0.334810 | -0.168520 | H    | -1.214265 | -2.809368 | 1.070388  |
| O    | -3.474161 | 0.598416  | -1.101892 | H    | -1.614980 | -2.704116 | 2.796508  |
| C    | -3.338205 | 1.192634  | -2.392936 | H    | -2.911540 | -2.773335 | 1.599579  |
| C    | -4.749849 | 0.837646  | -0.505540 | H    | -2.334533 | 0.957307  | -2.749451 |
| C    | -2.781871 | -0.308606 | 2.641401  | H    | -4.083118 | 0.780636  | -3.085927 |
| C    | -1.904836 | -2.341952 | 1.787983  | H    | -3.463083 | 2.281379  | -2.329122 |
| N    | 2.264041  | 2.187344  | 0.292301  | H    | -4.921021 | 1.915283  | -0.385876 |
| C    | 2.968898  | 2.142934  | -0.978364 | H    | -4.742237 | 0.357290  | 0.474127  |
| C    | 1.232406  | 3.210848  | 0.355955  | H    | -5.548608 | 0.408151  | -1.123956 |
| H    | 0.286208  | -2.788187 | -2.364762 | F    | -0.741764 | -0.565590 | -1.480543 |

Table 5 (Continued).

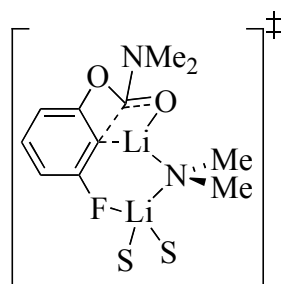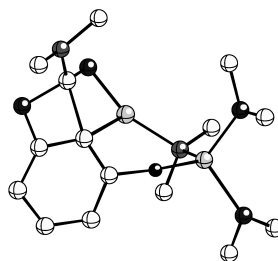

**A26**  
 $G^\circ = -1112.843260$   
 See pg S79  
 S = Me<sub>2</sub>O

| Atom | X         | Y         | Z         | Atom | X         | Y         | Z         |
|------|-----------|-----------|-----------|------|-----------|-----------|-----------|
| C    | 0.548279  | -2.597506 | -1.114210 | H    | -3.159934 | 0.653645  | 2.966829  |
| C    | 1.628119  | -3.371361 | -0.675649 | H    | -1.685967 | 0.773576  | 3.930914  |
| C    | 2.713180  | -2.809059 | 0.014556  | H    | -1.974229 | 1.927585  | 2.615609  |
| C    | 2.651765  | -1.435477 | 0.227243  | H    | -1.009115 | -2.053444 | 1.681269  |
| C    | 1.607704  | -0.607441 | -0.191178 | H    | -1.119697 | -1.565792 | 3.385687  |
| C    | 0.577576  | -1.224182 | -0.850632 | H    | -2.588768 | -1.704998 | 2.419670  |
| O    | 3.528717  | -0.599119 | 0.836045  | F    | -0.537808 | -0.476690 | -1.271465 |
| C    | 2.668940  | 0.654666  | 0.628925  | O    | -3.539397 | -0.712186 | -0.656026 |
| O    | 2.145016  | 1.148540  | 1.674273  | C    | -3.510846 | -1.800775 | -1.574052 |
| Li   | 0.539357  | 0.321701  | 1.772217  | H    | -3.449918 | -2.759092 | -1.040554 |
| N    | -1.376410 | 0.014857  | 1.939633  | H    | -4.409099 | -1.797270 | -2.206778 |
| Li   | -1.901527 | 0.231165  | 0.053334  | C    | -1.331141 | 3.144946  | -0.208147 |
| C    | -2.069764 | 0.867878  | 2.892866  | H    | -1.911189 | 4.072523  | -0.109429 |
| C    | -1.528113 | -1.371240 | 2.370496  | H    | -0.502855 | 3.305654  | -0.910418 |
| N    | 3.352607  | 1.514409  | -0.252417 | O    | -2.168392 | 2.078758  | -0.649807 |
| C    | 3.910643  | 0.960535  | -1.475019 | C    | -2.735721 | 2.322885  | -1.931821 |
| C    | 2.742220  | 2.821644  | -0.424966 | H    | -1.951698 | 2.425226  | -2.694975 |
| H    | -0.286981 | -3.043649 | -1.644403 | H    | -3.369278 | 1.465834  | -2.165129 |
| H    | 3.547496  | -3.413475 | 0.354898  | H    | -3.344791 | 3.237180  | -1.917065 |
| H    | 1.620862  | -4.439939 | -0.874182 | C    | -4.651115 | -0.773048 | 0.235800  |
| H    | 4.581939  | 1.701418  | -1.921808 | H    | -5.595177 | -0.705223 | -0.321998 |
| H    | 4.489683  | 0.066300  | -1.245422 | H    | -4.634692 | -1.705479 | 0.814410  |
| H    | 3.133905  | 0.703447  | -2.216765 | H    | -4.563739 | 0.074083  | 0.918208  |
| H    | 1.861926  | 2.789158  | -1.095997 | H    | -2.622601 | -1.671500 | -2.193394 |
| H    | 2.433818  | 3.205940  | 0.546669  | H    | -0.931036 | 2.858342  | 0.765226  |
| H    | 3.476631  | 3.503965  | -0.866211 |      |           |           |           |

**Table 5 (Continued).**

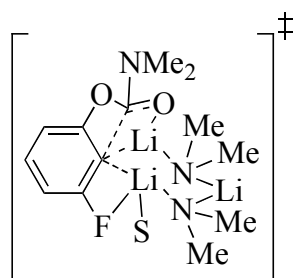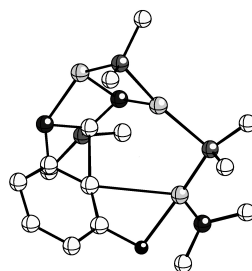

**A27**  
 $G^\circ = -1099.955863$   
 See pg S79  
 $S = \text{Me}_2\text{O}$

| Atom | X         | Y         | Z         | Atom | X         | Y         | Z         |
|------|-----------|-----------|-----------|------|-----------|-----------|-----------|
| C    | -0.322475 | -2.003541 | 2.768553  | C    | -4.013270 | 1.209791  | 0.694382  |
| C    | -1.435372 | -2.767563 | 2.406523  | H    | -3.618341 | 0.396697  | 1.321312  |
| C    | -1.891921 | -2.807300 | 1.079223  | H    | -3.984242 | 2.134553  | 1.309669  |
| C    | -1.168651 | -2.052955 | 0.167365  | H    | -5.091191 | 0.997239  | 0.529877  |
| C    | -0.043173 | -1.289133 | 0.440669  | C    | -3.812847 | 2.399768  | -1.340867 |
| C    | 0.330101  | -1.292712 | 1.761530  | H    | -4.878672 | 2.242975  | -1.612100 |
| O    | -0.698109 | 0.219036  | -1.757987 | H    | -3.780692 | 3.386952  | -0.830182 |
| C    | -0.304769 | -0.955862 | -1.511714 | H    | -3.258458 | 2.512031  | -2.286811 |
| O    | -1.430256 | -1.903463 | -1.194192 | C    | -0.132544 | 2.969200  | 1.909471  |
| N    | 0.660455  | -1.559871 | -2.293161 | H    | -0.446678 | 2.147717  | 2.569983  |
| C    | 1.684519  | -0.664063 | -2.821805 | H    | 0.680887  | 3.515738  | 2.435305  |
| C    | 1.132863  | -2.888783 | -1.934198 | H    | -0.983833 | 3.681151  | 1.860013  |
| H    | -1.961692 | -3.332951 | 3.170015  | C    | 0.664258  | 3.575854  | -0.232651 |
| H    | 0.024382  | -1.954628 | 3.795617  | H    | 0.960583  | 3.228008  | -1.234832 |
| H    | -2.761064 | -3.391358 | 0.793744  | H    | -0.142676 | 4.326982  | -0.382333 |
| H    | 1.797900  | -2.864117 | -1.055964 | H    | 1.521024  | 4.158013  | 0.176992  |
| H    | 0.285633  | -3.538562 | -1.716334 | O    | 3.325451  | 0.807246  | 0.256212  |
| H    | 1.681855  | -3.305154 | -2.783797 | C    | 4.195946  | -0.261339 | 0.620365  |
| H    | 2.215681  | -1.177393 | -3.628585 | H    | 4.786815  | -0.588705 | -0.245696 |
| H    | 1.210482  | 0.234250  | -3.215895 | H    | 4.875511  | 0.051089  | 1.424491  |
| H    | 2.412295  | -0.372133 | -2.047113 | H    | 3.569186  | -1.080479 | 0.972822  |
| Li   | -2.587664 | -0.185313 | -1.465615 | C    | 4.029975  | 1.958118  | -0.210076 |
| Li   | 1.413009  | 0.920880  | 0.732955  | H    | 3.284713  | 2.718026  | -0.445216 |
| N    | -3.253367 | 1.321004  | -0.539511 | H    | 4.708237  | 2.335414  | 0.566703  |
| N    | 0.265941  | 2.456064  | 0.604673  | H    | 4.610826  | 1.713218  | -1.109506 |
| Li   | -1.256875 | 1.602796  | -0.344057 | F    | 1.423599  | -0.496608 | 2.142343  |

**Table 5 (Continued).**

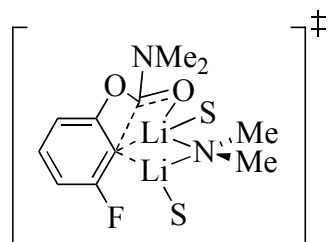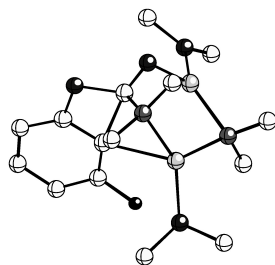

**A28**  
 $G^\circ = -1112.843762$   
 See pg S79  
 $S = \text{Me}_2\text{O}$

| Atom | X         | Y         | Z         | Atom | X         | Y         | Z         |
|------|-----------|-----------|-----------|------|-----------|-----------|-----------|
| C    | -0.767815 | 2.566473  | -2.277980 | H    | -0.813043 | 4.700167  | -2.042660 |
| C    | -0.696688 | 3.746985  | -1.533450 | H    | -3.025677 | -0.191060 | 2.429079  |
| C    | -0.478141 | 3.730221  | -0.146641 | H    | -2.290106 | 1.304668  | 3.069215  |
| C    | -0.335026 | 2.474714  | 0.430425  | H    | -2.519451 | 1.097928  | 1.317949  |
| C    | -0.401993 | 1.261478  | -0.248780 | H    | 0.362668  | -1.322370 | 3.160463  |
| C    | -0.615013 | 1.346968  | -1.607373 | H    | -0.600736 | -0.258870 | 4.214310  |
| O    | -0.092756 | 2.174918  | 1.745865  | H    | -1.366208 | -1.659947 | 3.421269  |
| C    | 0.103515  | 0.722938  | 1.587142  | H    | 0.047966  | -4.222358 | 0.400655  |
| O    | 1.276547  | 0.304656  | 1.710047  | H    | 1.786114  | -3.957954 | 0.528168  |
| Li   | 1.893148  | -0.842812 | 0.377603  | H    | 0.686025  | -3.161338 | 1.674012  |
| N    | 0.695402  | -2.266257 | -0.239615 | H    | 0.804476  | -1.827589 | -2.297299 |
| Li   | -0.834884 | -1.041618 | 0.059758  | H    | 1.871948  | -3.166425 | -1.803345 |
| O    | -2.666251 | -1.581007 | -0.512123 | H    | 0.137545  | -3.438446 | -1.958760 |
| C    | -2.793015 | -2.951887 | -0.885864 | H    | -2.051956 | -3.511761 | -0.314147 |
| C    | -3.558447 | -0.736972 | -1.234441 | H    | -3.801981 | -3.320068 | -0.654083 |
| C    | 0.807243  | -3.435011 | 0.615788  | H    | -2.594261 | -3.080672 | -1.957951 |
| C    | 0.883800  | -2.685659 | -1.617780 | H    | -3.382324 | -0.819311 | -2.314532 |
| O    | 3.651191  | -0.281505 | -0.194709 | H    | -4.601232 | -1.001813 | -1.012051 |
| C    | 4.165386  | 0.973940  | 0.250892  | H    | -3.363960 | 0.287880  | -0.915917 |
| C    | 4.438910  | -0.889750 | -1.211094 | H    | 3.460702  | 1.351203  | 0.992836  |
| N    | -0.964666 | -0.073364 | 2.112775  | H    | 5.158752  | 0.843059  | 0.701002  |
| C    | -2.269485 | 0.578538  | 2.245056  | H    | 4.510544  | -0.234796 | -2.090294 |
| C    | -0.617668 | -0.870745 | 3.299056  | H    | 5.449975  | -1.107600 | -0.840483 |
| H    | 4.236887  | 1.677771  | -0.589348 | H    | 3.941587  | -1.820540 | -1.490205 |
| H    | -0.938415 | 2.580673  | -3.350040 | F    | -0.724585 | 0.190592  | -2.346484 |
| H    | -0.417743 | 4.645001  | 0.433931  |      |           |           |           |

Table 5 (Continued).

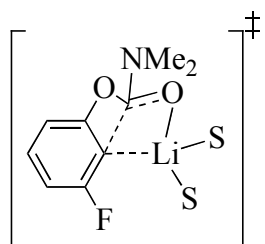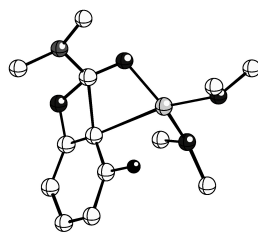

**A29**  
 $G^\circ = -970.764758$   
 See pg S79  
 S = Me<sub>2</sub>O

| Atom | X         | Y         | Z         | Atom | X         | Y         | Z         |
|------|-----------|-----------|-----------|------|-----------|-----------|-----------|
| C    | -0.759649 | -0.778526 | 1.669241  | H    | -1.096027 | -2.501439 | 2.927355  |
| C    | -0.968478 | -0.164561 | 0.454076  | H    | -0.130075 | 3.502368  | -0.844901 |
| C    | -1.751428 | -0.854729 | -0.471563 | H    | -1.659029 | 4.256851  | -0.332638 |
| C    | -2.315804 | -2.108658 | -0.263215 | H    | -0.723513 | 3.280563  | 0.826695  |
| C    | -2.058778 | -2.690522 | 0.990071  | H    | -3.604898 | 1.234290  | -0.547333 |
| C    | -1.284864 | -2.047037 | 1.959652  | H    | -2.949800 | 1.784065  | 1.019413  |
| O    | -1.829680 | -0.027349 | -1.547834 | H    | -3.616695 | 2.960050  | -0.144149 |
| C    | -0.959084 | 1.069518  | -0.932245 | H    | 2.843010  | -2.129914 | 0.491939  |
| O    | 0.184129  | 1.227886  | -1.463230 | H    | 1.454685  | -3.157324 | 0.023295  |
| Li   | 1.183143  | 0.168407  | -0.370739 | H    | 2.981368  | -3.225943 | -0.914300 |
| O    | 1.853723  | -1.493576 | -1.165838 | H    | 1.832953  | -2.467108 | -3.006184 |
| C    | 1.149694  | -1.932098 | -2.333036 | H    | 0.316669  | -2.588374 | -2.052328 |
| C    | 2.304102  | -2.570287 | -0.349997 | H    | 0.755905  | -1.036671 | -2.814797 |
| O    | 2.748389  | 0.851285  | 0.605900  | H    | 3.659212  | 2.235012  | -0.662299 |
| C    | 2.575335  | 1.733404  | 1.716014  | H    | 4.774595  | 1.229138  | 0.316721  |
| C    | 3.828978  | 1.234737  | -0.241979 | H    | 3.876034  | 0.501083  | -1.049117 |
| N    | -1.758713 | 2.205970  | -0.703511 | H    | 1.726862  | 1.356598  | 2.286439  |
| C    | -3.047270 | 2.029240  | -0.052366 | H    | 3.476900  | 1.735317  | 2.343240  |
| C    | -1.023047 | 3.370741  | -0.234943 | H    | 2.370377  | 2.755590  | 1.370551  |
| H    | -2.930416 | -2.604035 | -1.008116 | F    | 0.009882  | -0.179094 | 2.633393  |
| H    | -2.476234 | -3.668589 | 1.216531  |      |           |           |           |

**Table 5 (Continued).**

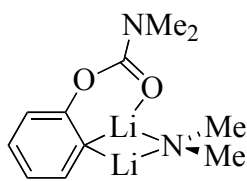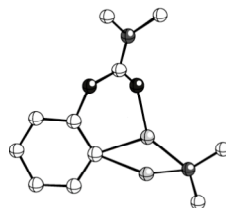

**A30**  
 $G^\circ = -703.680871$   
 See pg S84

| Atom | X         | Y         | Z         | Atom | X         | Y         | Z         |
|------|-----------|-----------|-----------|------|-----------|-----------|-----------|
| C    | -2.354312 | 3.020300  | -0.153635 | H    | -1.072430 | 4.682686  | -0.676292 |
| C    | -1.123486 | 3.642079  | -0.366564 | H    | -3.278118 | 3.576747  | -0.297260 |
| C    | 0.050564  | 2.910605  | -0.183756 | H    | 1.026582  | 3.360611  | -0.344891 |
| C    | -0.053207 | 1.580494  | 0.219388  | H    | -3.857039 | -1.746685 | -0.510626 |
| C    | -1.237093 | 0.882696  | 0.467528  | H    | -3.270219 | -3.230162 | -1.288623 |
| C    | -2.390413 | 1.677894  | 0.242378  | H    | -3.916715 | -3.297221 | 0.354817  |
| Li   | -1.858718 | -0.891703 | 1.384683  | H    | 3.272314  | 1.119906  | 1.305407  |
| O    | 0.892985  | -0.701207 | -1.079103 | H    | 4.076294  | -0.410194 | 1.730305  |
| Li   | -0.924383 | -1.003573 | -0.763557 | H    | 4.683583  | 0.563664  | 0.371528  |
| N    | -1.972003 | -2.384359 | 0.204160  | H    | 4.320996  | -1.341341 | -1.287292 |
| C    | -1.270839 | -3.637257 | 0.435777  | H    | 3.795424  | -2.365833 | 0.070267  |
| C    | -3.296626 | -2.676843 | -0.325716 | H    | 2.701460  | -2.086755 | -1.311536 |
| C    | 1.612706  | -0.099285 | -0.264516 | H    | -0.262680 | -3.450167 | 0.836137  |
| O    | 1.225065  | 0.965185  | 0.452085  | H    | -1.786389 | -4.302800 | 1.159482  |
| N    | 2.894203  | -0.467364 | -0.010908 | H    | -1.144047 | -4.243465 | -0.486342 |
| C    | 3.458691  | -1.633943 | -0.674731 | H    | -3.379322 | 1.232239  | 0.382567  |
| C    | 3.777318  | 0.245732  | 0.902573  |      |           |           |           |

**Table 5 (Continued).**

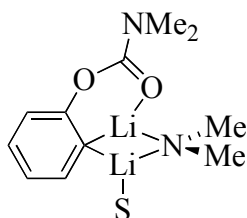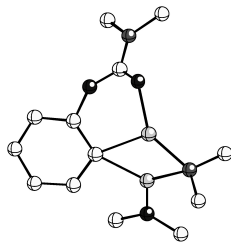

**A31**  
 $G^\circ = -858.662455$   
 See pg S80  
 $S = \text{Me}_2\text{O}$

| Atom | X         | Y         | Z         | Atom | X         | Y         | Z         |
|------|-----------|-----------|-----------|------|-----------|-----------|-----------|
| C    | 0.482676  | 3.555467  | -1.124155 | H    | -1.253595 | 4.823733  | -0.877700 |
| C    | -0.837079 | 3.826497  | -0.760346 | H    | 1.108768  | 4.346621  | -1.532213 |
| C    | -1.626125 | 2.796849  | -0.246506 | H    | -2.659367 | 2.969123  | 0.043828  |
| C    | -1.056011 | 1.532008  | -0.105676 | H    | 2.830762  | -0.618098 | -2.624795 |
| C    | 0.253031  | 1.172576  | -0.430647 | H    | 3.740348  | -1.978586 | -1.930618 |
| C    | 0.990397  | 2.259854  | -0.965697 | H    | 2.516312  | -2.278722 | -3.168799 |
| Li   | 0.043625  | -0.761698 | -1.513756 | H    | 1.337095  | -3.836030 | -1.634997 |
| O    | -1.783242 | -0.975829 | -1.139770 | H    | 2.550229  | -3.541874 | -0.384943 |
| C    | -2.273815 | -0.562664 | -0.077182 | H    | 0.832810  | -3.245188 | -0.037484 |
| O    | -1.949822 | 0.592629  | 0.519009  | H    | -3.515299 | 0.225508  | 2.057170  |
| N    | -3.220221 | -1.258308 | 0.607507  | H    | -4.935032 | -0.797233 | 1.725439  |
| C    | -3.643189 | -2.566515 | 0.130020  | H    | -3.578046 | -1.442382 | 2.676650  |
| C    | -3.843252 | -0.787061 | 1.836362  | H    | -3.441073 | -3.331854 | 0.890555  |
| Li   | 1.750777  | -0.295332 | 0.061281  | H    | -4.720511 | -2.563289 | -0.079620 |
| O    | 3.016764  | -0.030490 | 1.484240  | H    | -3.099010 | -2.808750 | -0.780628 |
| C    | 2.991192  | 1.038991  | 2.424214  | H    | 4.001158  | -1.710699 | 0.912214  |
| C    | 4.089376  | -0.946368 | 1.686177  | H    | 4.018656  | -1.412473 | 2.678478  |
| H    | 5.056981  | -0.434402 | 1.595052  | H    | 2.861099  | 0.653994  | 3.444940  |
| N    | 1.709942  | -1.754505 | -1.243376 | H    | 2.145318  | 1.674460  | 2.156544  |
| C    | 1.605263  | -3.135791 | -0.814416 | H    | 2.025323  | 2.094004  | -1.279247 |
| C    | 2.730006  | -1.656942 | -2.272537 | H    | 3.921411  | 1.621037  | 2.373192  |



**Table 5 (Continued).**

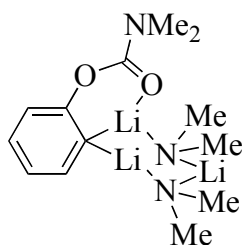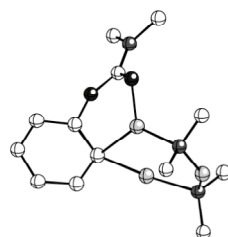

**A32**  
 $G^\circ = -845.768828$   
 See pg S77

| Atom | X         | Y         | Z         | Atom | X         | Y         | Z         |
|------|-----------|-----------|-----------|------|-----------|-----------|-----------|
| C    | 0.479457  | 3.893332  | -0.194105 | Li   | -1.208247 | 0.249050  | -1.603558 |
| C    | 1.859369  | 3.710877  | -0.093490 | N    | -2.231850 | -0.266524 | 1.909685  |
| C    | 2.391022  | 2.425810  | -0.212952 | N    | -2.792145 | -0.839554 | -1.701648 |
| C    | 1.513489  | 1.367250  | -0.439796 | Li   | -3.000866 | -0.776473 | 0.230933  |
| C    | 0.125498  | 1.460054  | -0.568943 | C    | -2.871398 | 0.886588  | 2.534586  |
| C    | -0.350406 | 2.787788  | -0.420236 | H    | -2.302517 | 1.286391  | 3.401457  |
| O    | 1.133048  | -0.809402 | 1.198549  | H    | -2.973615 | 1.712635  | 1.814930  |
| C    | 1.933425  | -0.889038 | 0.254493  | H    | -3.887691 | 0.668940  | 2.926300  |
| O    | 2.169275  | 0.104620  | -0.620280 | C    | -2.118041 | -1.332227 | 2.898890  |
| N    | 2.667830  | -2.000896 | 0.001511  | H    | -3.097904 | -1.660559 | 3.306147  |
| C    | 2.523502  | -3.173944 | 0.852619  | H    | -1.636779 | -2.218904 | 2.460552  |
| C    | 3.638212  | -2.104096 | -1.080861 | H    | -1.511732 | -1.044595 | 3.784429  |
| H    | 2.519590  | 4.556611  | 0.079922  | C    | -3.894249 | -0.229746 | -2.439538 |
| H    | 0.053637  | 4.889653  | -0.098238 | H    | -4.083896 | 0.793622  | -2.081878 |
| H    | 3.460375  | 2.247462  | -0.138984 | H    | -3.705045 | -0.159927 | -3.531149 |
| H    | 3.686560  | -1.168126 | -1.631489 | H    | -4.849060 | -0.787517 | -2.340426 |
| H    | 4.630394  | -2.334631 | -0.672345 | C    | -2.576456 | -2.190182 | -2.210828 |
| H    | 3.352840  | -2.911608 | -1.766974 | H    | -1.750905 | -2.681919 | -1.673605 |
| H    | 2.203753  | -4.037351 | 0.255688  | H    | -3.465651 | -2.846271 | -2.103971 |
| H    | 3.483197  | -3.416577 | 1.326182  | H    | -2.319182 | -2.215808 | -3.290510 |
| H    | 1.782753  | -2.971033 | 1.623541  | H    | -1.424242 | 2.976249  | -0.485755 |
| Li   | -0.461170 | 0.205932  | 1.194005  |      |           |           |           |

Table 5 (Continued).

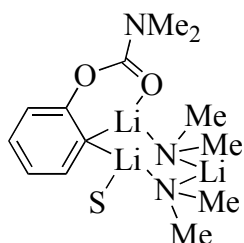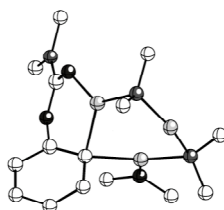

**A33**  
 $G^\circ = -1000.741527$   
 See pg S77  
 S = Me<sub>2</sub>O

| Atom | X         | Y         | Z         | Atom | X         | Y         | Z         |
|------|-----------|-----------|-----------|------|-----------|-----------|-----------|
| C    | 0.226655  | -0.014404 | 3.700017  | C    | 1.728343  | 3.877467  | 0.814100  |
| C    | -1.151556 | -0.176365 | 3.850369  | H    | 0.894348  | 4.574190  | 1.049179  |
| C    | -1.952998 | -0.293133 | 2.713589  | H    | 1.917539  | 3.290297  | 1.725311  |
| C    | -1.334175 | -0.252016 | 1.464839  | H    | 2.616479  | 4.525723  | 0.655271  |
| C    | 0.032398  | -0.106332 | 1.218494  | C    | 1.193755  | 3.818160  | -1.493414 |
| C    | 0.782912  | 0.026566  | 2.414529  | H    | 2.051167  | 4.469293  | -1.767169 |
| O    | -1.795198 | 1.552649  | -0.571100 | H    | 0.980598  | 3.185057  | -2.368218 |
| C    | -2.404832 | 0.474278  | -0.563035 | H    | 0.326710  | 4.503410  | -1.375676 |
| O    | -2.244548 | -0.478508 | 0.372394  | C    | 4.257476  | -0.770380 | -0.098855 |
| N    | -3.324121 | 0.141438  | -1.505092 | H    | 4.076676  | -0.636390 | 0.978225  |
| C    | -3.579161 | 1.047292  | -2.616779 | H    | 4.507168  | -1.844508 | -0.248462 |
| C    | -4.079127 | -1.103636 | -1.498662 | H    | 5.193933  | -0.221762 | -0.340162 |
| H    | -1.603010 | -0.207449 | 4.838592  | C    | 3.390342  | -0.524984 | -2.288405 |
| H    | 0.862202  | 0.081789  | 4.577825  | H    | 2.539902  | -0.198067 | -2.905848 |
| H    | -3.029831 | -0.418546 | 2.791846  | H    | 4.282803  | 0.033895  | -2.644996 |
| H    | -3.906578 | -1.642069 | -0.569955 | H    | 3.589865  | -1.585402 | -2.560261 |
| H    | -5.149799 | -0.883804 | -1.591963 | O    | 0.910421  | -2.893966 | -0.589053 |
| H    | -3.784810 | -1.738958 | -2.344706 | C    | -0.293883 | -3.534217 | -0.179208 |
| H    | -3.334869 | 0.559070  | -3.569013 | H    | -0.690831 | -4.159263 | -0.991601 |
| H    | -4.638544 | 1.332174  | -2.634782 | H    | -0.118598 | -4.162787 | 0.704832  |
| H    | -2.967521 | 1.939743  | -2.500183 | H    | -1.006650 | -2.747246 | 0.066763  |
| Li   | -0.045070 | 1.791592  | 0.098214  | C    | 1.933456  | -3.817762 | -0.948640 |
| Li   | 1.375554  | -1.016952 | -0.202982 | H    | 2.809551  | -3.230967 | -1.224866 |
| N    | 1.444155  | 3.000698  | -0.314534 | H    | 2.178265  | -4.474526 | -0.102069 |
| N    | 3.107515  | -0.327163 | -0.873981 | H    | 1.615273  | -4.433735 | -1.801100 |
| Li   | 2.625336  | 1.518385  | -0.551781 | H    | 1.865218  | 0.162349  | 2.346505  |

**Table 5 (Continued).**

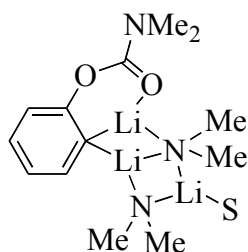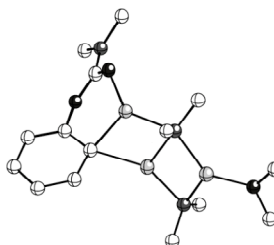

**A34**  
 $G^\circ = -1000.742460$   
 See pg S77  
 $S = \text{Me}_2\text{O}$

| Atom | X         | Y         | Z         | Atom | X        | Y         | Z         |
|------|-----------|-----------|-----------|------|----------|-----------|-----------|
| C    | -1.866681 | 3.668685  | -1.049816 | C    | 1.636630 | -0.471570 | -2.477428 |
| C    | -3.213118 | 3.433552  | -0.768760 | H    | 0.893614 | -0.885522 | -3.200849 |
| C    | -3.599348 | 2.184519  | -0.282593 | H    | 1.647702 | 0.617829  | -2.622582 |
| C    | -2.614889 | 1.216142  | -0.087136 | H    | 2.614812 | -0.856621 | -2.838125 |
| C    | -1.248873 | 1.365455  | -0.331617 | C    | 1.384281 | -2.255271 | -0.928012 |
| C    | -0.929951 | 2.649700  | -0.840199 | H    | 2.360664 | -2.709597 | -1.206378 |
| O    | -2.183874 | -1.435753 | -0.979331 | H    | 1.185280 | -2.534826 | 0.116334  |
| C    | -2.916349 | -1.197380 | -0.002868 | H    | 0.632453 | -2.788634 | -1.550078 |
| O    | -3.147179 | 0.017246  | 0.505471  | C    | 2.765718 | 2.426511  | 1.406975  |
| N    | -3.578030 | -2.179366 | 0.664237  | H    | 2.790006 | 2.821213  | 0.379082  |
| C    | -3.437514 | -3.564997 | 0.242292  | H    | 2.106609 | 3.101646  | 1.993699  |
| C    | -4.478600 | -1.935337 | 1.783075  | H    | 3.786624 | 2.577027  | 1.827664  |
| H    | -3.958357 | 4.209145  | -0.925800 | C    | 2.300853 | 0.568839  | 2.789202  |
| H    | -1.550029 | 4.637717  | -1.429999 | H    | 1.967248 | -0.480346 | 2.834998  |
| H    | -4.638543 | 1.964669  | -0.052584 | H    | 3.292509 | 0.607686  | 3.296163  |
| H    | -4.489726 | -0.877144 | 2.030690  | H    | 1.617187 | 1.151092  | 3.444377  |
| H    | -5.496359 | -2.258491 | 1.527231  | H    | 0.111185 | 2.880427  | -1.083216 |
| H    | -4.147082 | -2.505926 | 2.659676  | O    | 4.795208 | -0.701393 | -0.124310 |
| H    | -3.071193 | -4.177588 | 1.075838  | C    | 5.675693 | -0.114172 | 0.834759  |
| H    | -4.407593 | -3.965104 | -0.080417 | H    | 6.182516 | -0.894418 | 1.418599  |
| H    | -2.732846 | -3.619259 | -0.585025 | H    | 6.427501 | 0.510457  | 0.333643  |
| Li   | -0.629044 | -0.448943 | -1.242891 | H    | 5.055548 | 0.500507  | 1.488340  |
| Li   | 0.699594  | 0.697376  | 0.368924  | C    | 5.460897 | -1.537926 | -1.061989 |
| N    | 1.352134  | -0.802412 | -1.083220 | H    | 6.207202 | -0.966934 | -1.631351 |
| N    | 2.330138  | 1.042258  | 1.417552  | H    | 5.959270 | -2.373899 | -0.552207 |
| Li   | 2.928051  | -0.195789 | 0.045894  | H    | 4.702568 | -1.927694 | -1.743455 |

**Table 5 (Continued).**

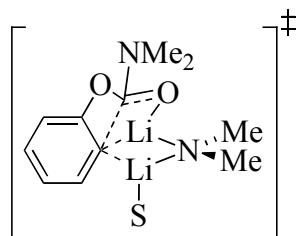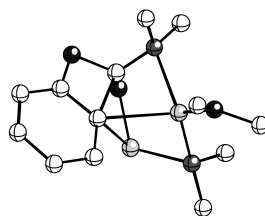

**A35**  
 $G^\circ = -858.612196$   
 See pg S80  
 $S = \text{Me}_2\text{O}$

| Atom | X         | Y         | Z         | Atom | X         | Y         | Z         |
|------|-----------|-----------|-----------|------|-----------|-----------|-----------|
| C    | -2.452356 | -2.366032 | -0.796544 | H    | -4.578447 | 0.115686  | 0.258368  |
| C    | -3.635681 | -1.737914 | -0.402048 | H    | -4.561223 | -2.307977 | -0.378368 |
| C    | -3.660646 | -0.380886 | -0.041144 | H    | 0.357146  | 1.237737  | 2.982596  |
| C    | -2.444810 | 0.283184  | -0.101674 | H    | -1.177570 | 2.071001  | 2.613947  |
| C    | -1.233082 | -0.297408 | -0.476623 | H    | -0.963692 | 0.361249  | 2.180735  |
| C    | -1.238698 | -1.648801 | -0.836635 | H    | 1.289952  | 3.176736  | 0.038765  |
| O    | -2.184370 | 1.596391  | 0.180829  | H    | 0.278604  | 3.786737  | 1.369914  |
| C    | -0.758727 | 1.601677  | -0.185853 | H    | 1.721497  | 2.803149  | 1.729023  |
| O    | -0.431676 | 2.212026  | -1.232147 | H    | 3.889638  | 0.735994  | -1.311438 |
| Li   | 0.162529  | 0.712268  | -2.131273 | H    | 3.270968  | 1.095845  | -2.924750 |
| N    | 1.903847  | -0.016329 | -1.689512 | H    | 2.620251  | 1.964372  | -1.520765 |
| Li   | 1.078654  | -0.069828 | 0.123891  | H    | 1.621712  | -2.067454 | -2.122332 |
| O    | 1.811327  | -1.287607 | 1.482294  | H    | 2.659600  | -1.232907 | -3.292015 |
| C    | 3.217153  | -1.526983 | 1.430975  | H    | 3.297630  | -1.657391 | -1.702139 |
| C    | 1.113745  | -2.243492 | 2.275153  | H    | 3.643958  | -0.785681 | 0.753563  |
| C    | 2.954432  | 0.976517  | -1.867094 | H    | 3.661584  | -1.422932 | 2.430068  |
| C    | 2.384947  | -1.281713 | -2.217256 | H    | 3.424369  | -2.532405 | 1.042202  |
| N    | 0.120767  | 1.690903  | 0.955824  | H    | 1.279916  | -3.259106 | 1.891293  |
| C    | -0.455948 | 1.325491  | 2.254739  | H    | 1.443723  | -2.194468 | 3.321646  |
| C    | 0.894699  | 2.942772  | 1.025278  | H    | 0.051447  | -2.003361 | 2.211445  |
| H    | -2.467764 | -3.415998 | -1.078550 | H    | -0.331556 | -2.163112 | -1.150711 |

Table 5 (Continued).

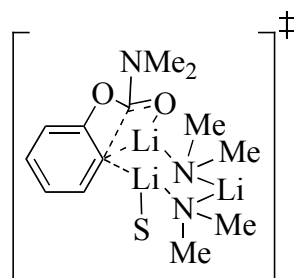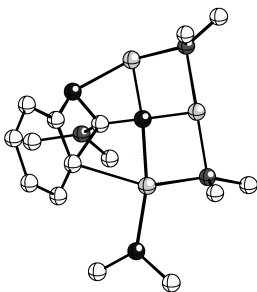

**A36**  
 $G^\circ = -1000.703234$   
 See pg S80  
 $S = \text{Me}_2\text{O}$

| Atom | X         | Y         | Z         | Atom | X         | Y         | Z         |
|------|-----------|-----------|-----------|------|-----------|-----------|-----------|
| C    | -1.592875 | -1.929156 | -2.843391 | C    | 4.291567  | -0.618814 | -0.958901 |
| C    | -0.802639 | -3.055434 | -2.605984 | H    | 3.572556  | -0.901539 | -1.741845 |
| C    | -0.122561 | -3.206959 | -1.388125 | H    | 4.890763  | 0.224746  | -1.361792 |
| C    | -0.286646 | -2.176005 | -0.478076 | H    | 5.001964  | -1.464811 | -0.850565 |
| C    | -1.051036 | -1.030221 | -0.641176 | C    | 4.584383  | 0.077070  | 1.288364  |
| C    | -1.724157 | -0.925062 | -1.866461 | H    | 5.310340  | -0.733556 | 1.508947  |
| O    | 0.653482  | 0.045243  | 1.361135  | H    | 5.200843  | 0.956116  | 1.001298  |
| C    | -0.199570 | -0.895359 | 1.330362  | H    | 4.092166  | 0.331119  | 2.240860  |
| O    | 0.304205  | -2.156801 | 0.805246  | C    | 1.139774  | 2.732097  | -2.048963 |
| N    | -1.110127 | -1.071284 | 2.335663  | H    | 0.974089  | 1.846259  | -2.678522 |
| C    | -1.484140 | 0.101558  | 3.118796  | H    | 0.441400  | 3.519764  | -2.412138 |
| C    | -2.119127 | -2.116447 | 2.226523  | H    | 2.155850  | 3.113697  | -2.288815 |
| H    | -0.713055 | -3.826457 | -3.366583 | C    | 1.210498  | 3.590492  | 0.155907  |
| H    | -2.111690 | -1.829410 | -3.794119 | H    | 1.088873  | 3.371598  | 1.229033  |
| H    | 0.485801  | -4.082313 | -1.177583 | H    | 2.233277  | 4.010073  | 0.023856  |
| H    | -2.938572 | -1.818553 | 1.556077  | H    | 0.527217  | 4.440700  | -0.068323 |
| H    | -1.667431 | -3.030124 | 1.842487  | O    | -2.315618 | 2.024377  | -0.158290 |
| H    | -2.524769 | -2.314970 | 3.222495  | C    | -3.604970 | 1.481610  | 0.089702  |
| H    | -1.845960 | -0.230557 | 4.096236  | H    | -4.102161 | 2.012308  | 0.914640  |
| H    | -0.610300 | 0.737497  | 3.255193  | H    | -4.236117 | 1.551119  | -0.807416 |
| H    | -2.279393 | 0.685328  | 2.631817  | H    | -3.466439 | 0.431770  | 0.351263  |
| Li   | 2.115489  | -1.291483 | 0.870939  | C    | -2.367298 | 3.375295  | -0.615805 |
| Li   | -0.482937 | 1.163665  | -0.135455 | H    | -1.340353 | 3.669923  | -0.825080 |
| N    | 3.600018  | -0.287765 | 0.278341  | H    | -2.972210 | 3.446189  | -1.530397 |
| N    | 0.962076  | 2.402247  | -0.645254 | H    | -2.800856 | 4.028894  | 0.153935  |
| Li   | 2.185537  | 1.088595  | 0.112263  | H    | -2.347657 | -0.060068 | -2.090810 |

Table 5 (Continued).

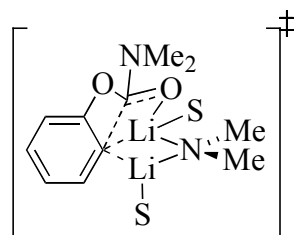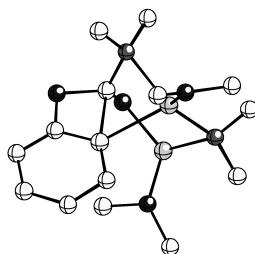

**A37**  
 $G^\circ = -1013.590873$   
 See pg S80  
 S = Me<sub>2</sub>O

| Atom | X         | Y         | Z         | Atom | X         | Y         | Z         |
|------|-----------|-----------|-----------|------|-----------|-----------|-----------|
| C    | -1.015283 | -2.175790 | -2.450551 | H    | -1.915898 | -4.121758 | -2.262724 |
| C    | -1.475743 | -3.280951 | -1.731779 | H    | 3.096888  | -1.435932 | 1.846314  |
| C    | -1.389484 | -3.324892 | -0.330725 | H    | 1.822712  | -2.427434 | 2.606942  |
| C    | -0.819292 | -2.216268 | 0.277798  | H    | 1.852603  | -2.211129 | 0.842895  |
| C    | -0.324499 | -1.096659 | -0.388799 | H    | 0.890557  | 1.164403  | 3.131119  |
| C    | -0.439585 | -1.075229 | -1.781752 | H    | 1.323991  | -0.312214 | 4.026058  |
| O    | -0.653372 | -2.001966 | 1.623401  | H    | 2.570145  | 0.568059  | 3.104198  |
| C    | -0.163428 | -0.623991 | 1.571916  | H    | 1.914408  | 3.752156  | 0.364329  |
| O    | -0.944441 | 0.279968  | 1.946371  | H    | 0.246838  | 4.259877  | 0.636964  |
| Li   | -1.182440 | 1.426124  | 0.472901  | H    | 0.968555  | 3.012791  | 1.674678  |
| N    | 0.434561  | 2.302778  | -0.240421 | H    | -0.026325 | 2.069404  | -2.287538 |
| Li   | 1.275263  | 0.519917  | -0.042414 | H    | -0.342438 | 3.706669  | -1.675031 |
| O    | 2.943876  | 0.195619  | -1.058037 | H    | 1.314768  | 3.196604  | -1.994078 |
| C    | 3.780683  | 1.323452  | -1.299680 | H    | 3.330463  | 2.169464  | -0.778486 |
| C    | 3.367350  | -0.974104 | -1.748512 | H    | 4.795831  | 1.142010  | -0.919705 |
| C    | 0.905055  | 3.362802  | 0.634618  | H    | 3.830608  | 1.543847  | -2.374435 |
| C    | 0.343281  | 2.832966  | -1.587418 | H    | 3.424128  | -0.784897 | -2.829286 |
| O    | -3.067221 | 1.628613  | 0.060654  | H    | 4.351726  | -1.305397 | -1.389370 |
| C    | -3.973988 | 0.651819  | 0.573736  | H    | 2.622338  | -1.747749 | -1.557615 |
| C    | -3.602274 | 2.385768  | -1.017420 | H    | -3.442856 | 0.122265  | 1.365395  |
| N    | 1.229898  | -0.499370 | 1.895993  | H    | -4.871586 | 1.139565  | 0.977373  |
| C    | 2.039535  | -1.716512 | 1.798176  | H    | -3.883653 | 1.729711  | -1.852824 |
| C    | 1.515685  | 0.273889  | 3.114215  | H    | -4.485037 | 2.953108  | -0.691751 |
| H    | -4.264377 | -0.053734 | -0.216082 | H    | -2.822992 | 3.077461  | -1.343375 |
| H    | -1.101288 | -2.164775 | -3.534868 | H    | -0.091378 | -0.226879 | -2.370733 |
| H    | -1.757234 | -4.173149 | 0.239113  |      |           |           |           |

Table 5 (Continued).

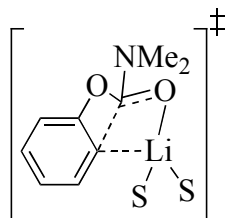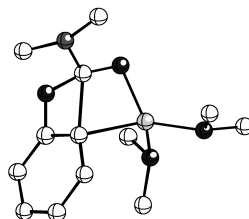

**A38**  
 $G^\circ = -871.514409$   
 See pg S80  
 $S = \text{Me}_2\text{O}$

| Atom | X         | Y         | Z         | Atom | X         | Y         | Z         |
|------|-----------|-----------|-----------|------|-----------|-----------|-----------|
| C    | -0.662526 | -0.776277 | 1.949085  | H    | -2.093812 | -3.841253 | 1.454809  |
| C    | -0.877060 | -0.225896 | 0.685685  | H    | -0.931263 | -2.531737 | 3.196211  |
| C    | -1.553072 | -0.999886 | -0.257794 | H    | -0.487225 | 3.513455  | -0.807125 |
| C    | -2.006065 | -2.296510 | -0.046541 | H    | -2.115544 | 4.087885  | -0.368966 |
| C    | -1.756385 | -2.831868 | 1.229766  | H    | -1.097178 | 3.294176  | 0.858116  |
| C    | -1.098685 | -2.091933 | 2.215440  | H    | -3.644949 | 0.826539  | -0.478631 |
| O    | -1.690494 | -0.219055 | -1.370199 | H    | -3.099592 | 1.509281  | 1.076006  |
| C    | -0.999303 | 1.000739  | -0.826551 | H    | -3.891173 | 2.549652  | -0.139837 |
| O    | 0.127397  | 1.284403  | -1.334875 | H    | 2.416636  | -2.277899 | 0.654205  |
| Li   | 1.141326  | 0.255836  | -0.214157 | H    | 1.050124  | -3.009566 | -0.233405 |
| O    | 1.943606  | -1.331246 | -1.085900 | H    | 2.732239  | -3.240404 | -0.819348 |
| C    | 1.472982  | -1.549673 | -2.420673 | H    | 2.207740  | -2.138721 | -2.986170 |
| C    | 2.036609  | -2.541137 | -0.335235 | H    | 0.509125  | -2.071867 | -2.406242 |
| O    | 2.595748  | 1.013296  | 0.878524  | H    | 1.335064  | -0.567538 | -2.872722 |
| C    | 2.301231  | 2.086938  | 1.767974  | H    | 3.940668  | 2.072506  | -0.313176 |
| C    | 3.875536  | 1.139618  | 0.263509  | H    | 4.669623  | 1.125961  | 1.022295  |
| N    | -1.938817 | 2.025953  | -0.637608 | H    | 3.988961  | 0.285405  | -0.405926 |
| C    | -3.207760 | 1.704728  | -0.004275 | H    | 1.301764  | 1.907633  | 2.167994  |
| C    | -1.374378 | 3.296793  | -0.213178 | H    | 3.028216  | 2.113704  | 2.590979  |
| H    | -2.541112 | -2.859715 | -0.806195 | H    | 2.314998  | 3.048332  | 1.237482  |
| H    | -0.162366 | -0.218005 | 2.741708  |      |           |           |           |

**Table 5 (Continued).**

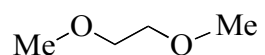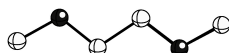

$G^\circ = -308.745832$

| Atom | X         | Y         | Z         |
|------|-----------|-----------|-----------|
| C    | -2.980716 | -0.113688 | 0.000155  |
| O    | -1.719840 | 0.519179  | -0.000163 |
| C    | -0.646509 | -0.400872 | -0.000111 |
| C    | 0.646509  | 0.400871  | 0.000009  |
| O    | 1.719840  | -0.519178 | -0.000041 |
| C    | 2.980716  | 0.113688  | 0.000070  |
| H    | -3.121127 | -0.744728 | -0.892514 |
| H    | -3.120974 | -0.744118 | 0.893279  |
| H    | -3.738156 | 0.674708  | -0.000058 |
| H    | -0.679961 | -1.051702 | -0.889275 |
| H    | -0.680084 | -1.051755 | 0.889009  |
| H    | 0.679991  | 1.051643  | 0.889215  |
| H    | 0.680053  | 1.051814  | -0.889069 |
| H    | 3.121011  | 0.744346  | 0.893027  |
| H    | 3.738156  | -0.674708 | 0.000037  |
| H    | 3.121091  | 0.744500  | -0.892766 |



**Table 5 (Continued).**

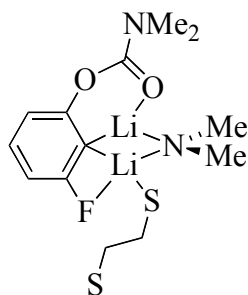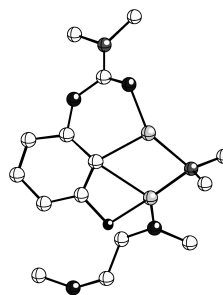

**A39**  
 $G^\circ = -1111.696585$   
 See pg S81  
 S = OMe

| Atom | X         | Y         | Z         | Atom | X         | Y         | Z         |
|------|-----------|-----------|-----------|------|-----------|-----------|-----------|
| C    | 1.043457  | -2.140472 | 2.066541  | H    | 0.210530  | -4.122926 | 2.252874  |
| C    | 0.077826  | -3.125939 | 1.842698  | H    | 1.940415  | -2.331625 | 2.647290  |
| C    | -1.058207 | -2.823768 | 1.091184  | H    | -1.821510 | -3.572543 | 0.901508  |
| C    | -1.197585 | -1.530642 | 0.577553  | H    | 0.447751  | 2.800134  | 2.941150  |
| C    | -0.291132 | -0.485287 | 0.750497  | H    | 1.062781  | 4.238591  | 2.099701  |
| C    | 0.786917  | -0.894235 | 1.512099  | H    | -0.630551 | 4.171317  | 2.603100  |
| F    | 1.781459  | 0.090960  | 1.738074  | H    | -1.339604 | 4.580267  | 0.252095  |
| Li   | -1.385969 | 1.397138  | 0.968644  | H    | 0.350120  | 4.643650  | -0.254973 |
| O    | -3.042229 | 0.636369  | 0.536654  | H    | -0.758138 | 3.481730  | -1.017760 |
| C    | -3.167146 | -0.336104 | -0.221411 | H    | -3.533302 | -2.255359 | -1.941904 |
| O    | -2.353175 | -1.403643 | -0.250885 | H    | -5.287418 | -2.152212 | -1.649571 |
| N    | -4.177671 | -0.434352 | -1.124562 | H    | -4.557553 | -1.266491 | -3.008238 |
| C    | -5.192683 | 0.608448  | -1.184032 | H    | -5.293907 | 0.970553  | -2.214153 |
| C    | -4.397338 | -1.596640 | -1.975088 | H    | -6.165213 | 0.217505  | -0.856553 |
| Li   | 0.990053  | 1.415716  | 0.410907  | H    | -4.900217 | 1.432246  | -0.536166 |
| O    | 2.266713  | 1.392140  | -1.063733 | H    | 2.308509  | 3.418275  | -1.152489 |
| C    | 2.770840  | 0.165406  | -1.606023 | H    | 2.731087  | 2.606859  | -2.688422 |
| C    | 4.082686  | -0.271111 | -0.941526 | H    | 2.911270  | 0.267945  | -2.690264 |
| O    | 4.529805  | -1.501566 | -1.485669 | H    | 1.988024  | -0.576783 | -1.428345 |
| C    | 4.021761  | -2.644433 | -0.817382 | H    | 3.936643  | -0.339431 | 0.146136  |
| C    | 2.849093  | 2.580929  | -1.597144 | H    | 4.874058  | 0.462192  | -1.133468 |
| H    | 3.913757  | 2.658064  | -1.345841 | H    | 2.923352  | -2.688935 | -0.824083 |
| N    | -0.156085 | 2.912454  | 0.922420  | H    | 4.412707  | -3.517057 | -1.347166 |
| C    | -0.486162 | 3.935238  | -0.051352 | H    | 4.361834  | -2.679086 | 0.229032  |
| C    | 0.190433  | 3.552408  | 2.179928  |      |           |           |           |

Table 5 (Continued).

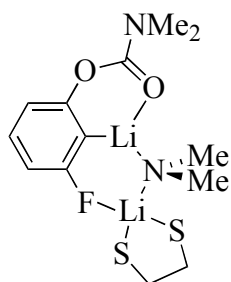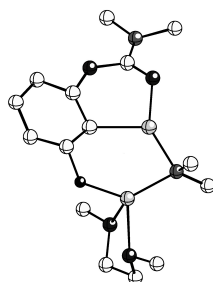

**A40**  
 $G^\circ = -1111.704715$   
 See pp S81 and 82  
 S = OMe

| Atom | X         | Y         | Z         | Atom | X         | Y         | Z         |
|------|-----------|-----------|-----------|------|-----------|-----------|-----------|
| C    | -0.167286 | 3.306337  | -1.056926 | N    | 1.344325  | -1.804978 | -1.013125 |
| C    | -1.517160 | 3.659022  | -0.963733 | C    | 1.585754  | -1.992785 | -2.432481 |
| C    | -2.458172 | 2.701343  | -0.586089 | C    | 1.662156  | -3.035281 | -0.316362 |
| C    | -2.011912 | 1.405214  | -0.305182 | H    | -1.832442 | 4.674282  | -1.187489 |
| C    | -0.692182 | 0.967179  | -0.364328 | H    | 0.595164  | 4.019974  | -1.353903 |
| C    | 0.146306  | 1.987930  | -0.757695 | H    | -3.512895 | 2.949471  | -0.508982 |
| F    | 1.527522  | 1.666696  | -0.870840 | H    | 1.352348  | -1.073650 | -2.992343 |
| Li   | -0.460460 | -1.081130 | -0.750360 | H    | 2.640819  | -2.254908 | -2.676342 |
| O    | -2.309360 | -1.449447 | -0.644749 | H    | 0.977472  | -2.808103 | -2.884045 |
| C    | -3.138215 | -0.760790 | -0.035906 | H    | 1.068756  | -3.911174 | -0.661833 |
| O    | -3.082281 | 0.567204  | 0.142075  | H    | 2.726624  | -3.351661 | -0.428257 |
| N    | -4.249117 | -1.303574 | 0.539640  | H    | 1.475139  | -2.930348 | 0.763381  |
| C    | -4.514187 | -2.725998 | 0.382898  | H    | -4.961685 | 0.499656  | 1.336413  |
| C    | -5.296656 | -0.522768 | 1.182141  | H    | -6.207878 | -0.513863 | 0.567758  |
| Li   | 1.963366  | -0.121487 | -0.192238 | H    | -5.543105 | -0.970473 | 2.152576  |
| O    | 4.060558  | 0.037552  | -0.093571 | H    | -4.720943 | -3.175301 | 1.361855  |
| C    | 4.774379  | -0.654867 | -1.115927 | H    | -5.387448 | -2.889034 | -0.263630 |
| C    | 4.399479  | -0.399376 | 1.216694  | H    | -3.645203 | -3.206627 | -0.061984 |
| C    | 3.531686  | 0.369849  | 2.191021  | H    | 1.457999  | 1.899893  | 2.669695  |
| O    | 2.174641  | 0.121817  | 1.848524  | H    | 0.257807  | 0.652129  | 2.241846  |
| C    | 1.245163  | 0.821932  | 2.672373  | H    | 1.286987  | 0.445578  | 3.703876  |
| H    | 3.744257  | 1.447565  | 2.123195  | H    | 4.422303  | -0.259974 | -2.069842 |
| H    | 3.739323  | 0.037231  | 3.219548  | H    | 5.854253  | -0.475486 | -1.019248 |
| H    | 5.461956  | -0.204889 | 1.428470  | H    | 4.569747  | -1.731683 | -1.073329 |
| H    | 4.214405  | -1.479806 | 1.311139  |      |           |           |           |

**Table 5 (Continued).**

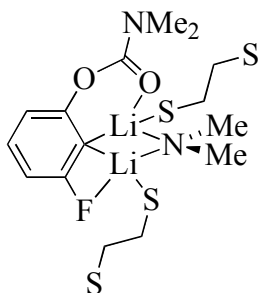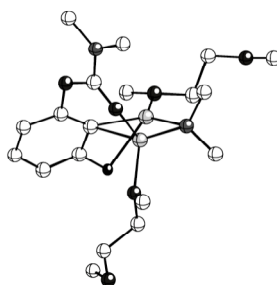

**A41**  
 $G^\circ = -1420.433448$   
 See pg S81  
 S = OMe

| Atom | X         | Y         | Z         | Atom | X         | Y         | Z         |
|------|-----------|-----------|-----------|------|-----------|-----------|-----------|
| C    | 1.995063  | -1.340418 | 2.615380  | H    | 3.304751  | 1.803302  | 2.792698  |
| C    | 2.845447  | -0.304099 | 3.011303  | H    | -0.952681 | -2.024084 | -2.246986 |
| C    | 2.657829  | 0.981480  | 2.499971  | H    | -2.552452 | -1.372816 | -2.656800 |
| C    | 1.604942  | 1.194763  | 1.606464  | H    | -1.141292 | -0.885426 | -3.599265 |
| C    | 0.709530  | 0.226561  | 1.159556  | H    | -1.640046 | 1.504165  | -3.083399 |
| C    | 0.993020  | -1.010014 | 1.709522  | H    | -3.047221 | 0.995928  | -2.143209 |
| Li   | 0.683715  | 0.418890  | -1.161099 | H    | -1.785693 | 1.988936  | -1.379809 |
| O    | 1.422075  | 2.189837  | -1.015555 | H    | 0.942022  | 4.634132  | 1.902637  |
| C    | 1.306713  | 2.941881  | -0.040641 | H    | 1.858586  | 5.850577  | 0.978952  |
| O    | 1.447654  | 2.565512  | 1.243080  | H    | 0.082871  | 5.813184  | 0.884405  |
| N    | 1.039070  | 4.270553  | -0.159530 | H    | 0.013908  | 5.450780  | -1.557993 |
| C    | 0.938949  | 4.866877  | -1.483366 | H    | 1.788373  | 5.537545  | -1.672840 |
| C    | 0.980760  | 5.189557  | 0.968946  | H    | 0.929064  | 4.077628  | -2.232431 |
| Li   | -1.200777 | -0.280225 | 0.298440  | H    | -1.854964 | -0.610218 | 3.137106  |
| N    | -1.222501 | -0.027864 | -1.628371 | H    | -2.738037 | -2.127985 | 2.802601  |
| C    | -1.472809 | -1.106480 | -2.559299 | H    | -4.096916 | -2.205035 | 0.869808  |
| C    | -1.944365 | 1.147825  | -2.073017 | H    | -3.588453 | -1.125570 | -0.452627 |
| O    | -2.804509 | -0.641088 | 1.344339  | H    | -4.980830 | 0.723763  | 0.524032  |
| C    | -2.768155 | -1.034000 | 2.715521  | H    | -5.494389 | -0.349463 | 1.842757  |
| C    | -3.910781 | -1.158847 | 0.590853  | H    | -5.416163 | -0.747117 | -1.876264 |
| C    | -5.182026 | -0.324983 | 0.792818  | H    | -7.189202 | -0.875664 | -1.752697 |
| O    | -6.265030 | -0.850509 | 0.046662  | H    | -6.377482 | 0.670698  | -1.378171 |
| C    | -6.298966 | -0.425205 | -1.306056 | H    | 2.788260  | 0.833225  | -3.044423 |
| O    | 2.152798  | -0.716323 | -1.904608 | H    | 3.956672  | -0.507534 | -2.947288 |
| C    | 2.108460  | -2.138494 | -1.752706 | H    | 2.491430  | -0.677147 | -3.961047 |
| C    | 3.393071  | -2.705116 | -1.135268 | H    | 1.913267  | -2.616891 | -2.722270 |
| O    | 3.273859  | -4.108042 | -0.957508 | H    | 1.260755  | -2.338662 | -1.093582 |
| C    | 2.721960  | -4.483481 | 0.294008  | H    | 3.604238  | -2.192137 | -0.185695 |
| C    | 2.892910  | -0.253468 | -3.029985 | H    | 4.248038  | -2.548420 | -1.802575 |
| F    | 0.155580  | -2.065590 | 1.305337  | H    | 1.745378  | -4.018347 | 0.485546  |
| H    | -3.634428 | -0.648433 | 3.266015  | H    | 2.599619  | -5.569769 | 0.269558  |
| H    | 3.649724  | -0.497938 | 3.715503  | H    | 3.398351  | -4.219437 | 1.122017  |
| H    | 2.105829  | -2.351411 | 2.995682  |      |           |           |           |

Table 5 (Continued).

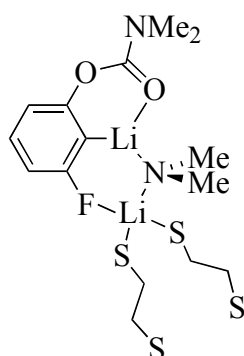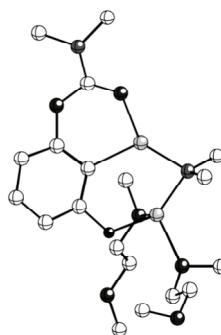

**A42**  
 $G^\circ = -1420.429740$   
 See pg S81  
 S = OMe

| Atom | X         | Y         | Z         | Atom | X         | Y         | Z         |
|------|-----------|-----------|-----------|------|-----------|-----------|-----------|
| C    | 0.388916  | -0.538848 | 3.078493  | H    | 3.761184  | -0.246974 | 3.472367  |
| C    | 1.624012  | -0.477277 | 3.731654  | H    | -0.084745 | -2.762382 | -1.482908 |
| C    | 2.789790  | -0.296849 | 2.988778  | H    | -1.089713 | -2.537608 | -2.931772 |
| C    | 2.682804  | -0.177819 | 1.597735  | H    | 0.654808  | -2.761327 | -3.097568 |
| C    | 1.499661  | -0.224021 | 0.866875  | H    | 0.863037  | -0.632277 | -4.319054 |
| C    | 0.419053  | -0.413582 | 1.696733  | H    | -0.882561 | -0.390794 | -4.196527 |
| F    | -0.861346 | -0.494605 | 1.070903  | H    | 0.225899  | 0.853101  | -3.585582 |
| Li   | 1.665228  | -0.599512 | -1.177611 | H    | 5.956537  | 1.023378  | 1.376062  |
| O    | 3.549404  | -0.585366 | -1.163397 | H    | 7.208711  | -0.077963 | 0.751603  |
| C    | 4.284246  | -0.123005 | -0.281475 | H    | 7.068387  | 1.571009  | 0.100754  |
| O    | 3.962619  | 0.063457  | 1.006060  | H    | 6.614422  | 0.945556  | -2.225252 |
| N    | 5.567189  | 0.265104  | -0.540135 | H    | 6.883764  | -0.768606 | -1.828180 |
| C    | 6.130737  | 0.031111  | -1.861573 | H    | 5.334979  | -0.256552 | -2.545721 |
| C    | 6.498127  | 0.717159  | 0.484553  | H    | 0.594040  | 2.227256  | -1.799249 |
| Li   | -1.018580 | -0.052773 | -0.882466 | H    | 0.727296  | 2.593935  | -0.058487 |
| N    | 0.084579  | -0.832286 | -2.323650 | H    | -1.336588 | 2.827654  | 1.130341  |
| C    | -0.114449 | -2.264445 | -2.465526 | H    | -2.578477 | 1.665389  | 0.622921  |
| C    | 0.072870  | -0.235341 | -3.643990 | H    | -3.441711 | 3.312280  | -1.064918 |
| O    | -2.997470 | -0.529308 | -0.940984 | H    | -2.208267 | 4.483812  | -0.560163 |
| C    | -3.684190 | -1.391720 | -0.028466 | H    | -4.637204 | 2.432433  | 1.438809  |
| C    | -3.484876 | -2.883512 | -0.329242 | H    | -5.396166 | 3.996899  | 1.817338  |
| O    | -4.115419 | -3.676763 | 0.663566  | H    | -5.445548 | 3.365572  | 0.147992  |
| C    | -3.301961 | -3.940141 | 1.793755  | H    | -3.032558 | 0.314090  | -2.788765 |
| C    | -3.565625 | -0.470956 | -2.250078 | H    | -3.440503 | -1.415476 | -2.790745 |
| O    | -1.132982 | 1.972826  | -0.760928 | H    | -4.633458 | -0.218568 | -2.191112 |
| C    | 0.091832  | 2.687490  | -0.946906 | H    | -4.757509 | -1.153586 | -0.030087 |
| C    | -1.956675 | 2.497463  | 0.286619  | H    | -3.276442 | -1.152057 | 0.955487  |
| C    | -2.832285 | 3.653675  | -0.212917 | H    | -2.411540 | -3.110654 | -0.406357 |
| O    | -3.646603 | 4.181284  | 0.820168  | H    | -3.954009 | -3.153555 | -1.281071 |
| C    | -4.832389 | 3.446475  | 1.059614  | H    | -3.008703 | -3.025419 | 2.329673  |
| H    | -0.094631 | 3.745502  | -1.167829 | H    | -3.893722 | -4.565191 | 2.467698  |
| H    | 1.675263  | -0.570054 | 4.812816  | H    | -2.387406 | -4.483530 | 1.511373  |
| H    | -0.541040 | -0.680885 | 3.621018  |      |           |           |           |

**Table 5 (Continued).**

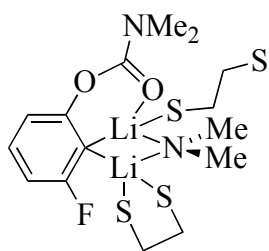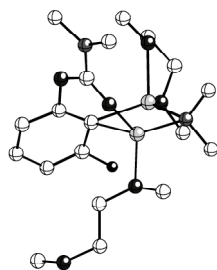

**A43**  
 $G^\circ = -1420.440459$   
 See pg S81  
 S = OMe

| Atom | X         | Y         | Z         | Atom | X         | Y         | Z         |
|------|-----------|-----------|-----------|------|-----------|-----------|-----------|
| C    | -1.397971 | -1.308186 | -2.731742 | H    | 4.501653  | -2.406671 | 0.606535  |
| C    | -1.732450 | -0.079349 | -3.307922 | H    | -2.394016 | -0.040983 | -4.169198 |
| C    | -1.210938 | 1.099345  | -2.771250 | H    | -1.784699 | -2.246654 | -3.118496 |
| C    | -0.351246 | 0.997731  | -1.674026 | H    | -1.456020 | 2.069666  | -3.193519 |
| C    | 0.049956  | -0.177322 | -1.044463 | H    | 0.113494  | -2.711877 | 2.120496  |
| C    | -0.539761 | -1.286785 | -1.634797 | H    | 1.660862  | -2.746850 | 3.002592  |
| F    | -0.255811 | -2.522632 | -1.074628 | H    | 0.248679  | -1.986687 | 3.736803  |
| Li   | -0.335628 | 0.087089  | 1.177541  | H    | 1.508674  | 0.140968  | 3.980723  |
| O    | -0.432578 | 2.029620  | 0.924856  | H    | 2.928696  | -0.621765 | 3.255256  |
| C    | 0.109903  | 2.662361  | 0.014479  | H    | 2.256763  | 0.858155  | 2.537176  |
| O    | 0.184475  | 2.263831  | -1.267277 | H    | 1.328927  | 4.128480  | -1.774890 |
| N    | 0.715783  | 3.870356  | 0.213501  | H    | 0.452878  | 5.518595  | -1.090516 |
| C    | 0.623317  | 4.495903  | 1.525504  | H    | 2.126756  | 5.189835  | -0.589449 |
| C    | 1.178367  | 4.720812  | -0.875441 | H    | 1.585722  | 4.954356  | 1.778859  |
| Li   | 1.707462  | -1.000988 | 0.222591  | H    | -0.148116 | 5.279147  | 1.538102  |
| N    | 1.116002  | -0.861373 | 2.117060  | H    | 0.374281  | 3.739423  | 2.267331  |
| C    | 0.776028  | -2.110754 | 2.761086  | H    | 3.216633  | 1.324752  | -1.741393 |
| C    | 1.976533  | -0.101811 | 2.997638  | H    | 3.044885  | 1.856068  | -0.045282 |
| O    | 3.567993  | -0.092614 | -0.252761 | H    | 4.675225  | 1.601603  | -0.732113 |
| C    | 3.635092  | 1.244928  | -0.729149 | H    | 1.354530  | -4.080160 | -0.112927 |
| C    | 4.341075  | -1.000527 | -1.024820 | H    | 2.946528  | -4.741135 | -0.593031 |
| C    | 4.146504  | -2.381433 | -0.435034 | H    | 2.708900  | -4.074764 | 1.056804  |
| O    | 2.758010  | -2.671828 | -0.486775 | H    | -2.670779 | 0.937326  | 3.287105  |
| C    | 2.432271  | -3.971332 | -0.000562 | H    | -3.175511 | -0.758699 | 3.563638  |
| O    | -2.202588 | -0.385526 | 1.745141  | H    | -1.445968 | -0.326300 | 3.622464  |
| C    | -2.398299 | -0.116146 | 3.132331  | H    | -2.904323 | 0.020329  | -0.104758 |
| C    | -3.312504 | -0.056314 | 0.905657  | H    | -3.724801 | 0.922771  | 1.187181  |
| C    | -4.413140 | -1.123709 | 0.958696  | H    | -4.832697 | -1.193576 | 1.968279  |
| O    | -5.494934 | -0.789217 | 0.104632  | H    | -3.987120 | -2.105764 | 0.701829  |
| C    | -5.319620 | -1.204253 | -1.239136 | H    | -5.224111 | -2.299387 | -1.309672 |
| H    | 4.006890  | -0.985455 | -2.073682 | H    | -6.215698 | -0.891846 | -1.782491 |
| H    | 5.406666  | -0.725239 | -0.992636 | H    | -4.439886 | -0.749563 | -1.715472 |
| H    | 4.718670  | -3.118688 | -1.019131 |      |           |           |           |

**Table 5 (Continued).**

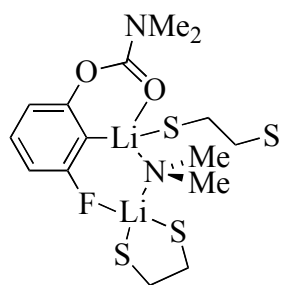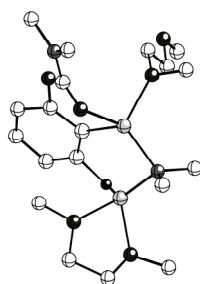

**A44**  
 $G^\circ = -1420.439104$   
 See pg S81  
 S = OMe

| Atom | X         | Y         | Z         | Atom | X         | Y         | Z         |
|------|-----------|-----------|-----------|------|-----------|-----------|-----------|
| C    | -1.397971 | -1.308186 | -2.731742 | H    | 4.501653  | -2.406671 | 0.606535  |
| C    | -1.732450 | -0.079349 | -3.307922 | H    | -2.394016 | -0.040983 | -4.169198 |
| C    | -1.210938 | 1.099345  | -2.771250 | H    | -1.784699 | -2.246654 | -3.118496 |
| C    | -0.351246 | 0.997731  | -1.674026 | H    | -1.456020 | 2.069666  | -3.193519 |
| C    | 0.049956  | -0.177322 | -1.044463 | H    | 0.113494  | -2.711877 | 2.120496  |
| C    | -0.539761 | -1.286785 | -1.634797 | H    | 1.660862  | -2.746850 | 3.002592  |
| F    | -0.255811 | -2.522632 | -1.074628 | H    | 0.248679  | -1.986687 | 3.736803  |
| Li   | -0.335628 | 0.087089  | 1.177541  | H    | 1.508674  | 0.140968  | 3.980723  |
| O    | -0.432578 | 2.029620  | 0.924856  | H    | 2.928696  | -0.621765 | 3.255256  |
| C    | 0.109903  | 2.662361  | 0.014479  | H    | 2.256763  | 0.858155  | 2.537176  |
| O    | 0.184475  | 2.263831  | -1.267277 | H    | 1.328927  | 4.128480  | -1.774890 |
| N    | 0.715783  | 3.870356  | 0.213501  | H    | 0.452878  | 5.518595  | -1.090516 |
| C    | 0.623317  | 4.495903  | 1.525504  | H    | 2.126756  | 5.189835  | -0.589449 |
| C    | 1.178367  | 4.720812  | -0.875441 | H    | 1.585722  | 4.954356  | 1.778859  |
| Li   | 1.707462  | -1.000988 | 0.222591  | H    | -0.148116 | 5.279147  | 1.538102  |
| N    | 1.116002  | -0.861373 | 2.117060  | H    | 0.374281  | 3.739423  | 2.267331  |
| C    | 0.776028  | -2.110754 | 2.761086  | H    | 3.216633  | 1.324752  | -1.741393 |
| C    | 1.976533  | -0.101811 | 2.997638  | H    | 3.044885  | 1.856068  | -0.045282 |
| O    | 3.567993  | -0.092614 | -0.252761 | H    | 4.675225  | 1.601603  | -0.732113 |
| C    | 3.635092  | 1.244928  | -0.729149 | H    | 1.354530  | -4.080160 | -0.112927 |
| C    | 4.341075  | -1.000527 | -1.024820 | H    | 2.946528  | -4.741135 | -0.593031 |
| C    | 4.146504  | -2.381433 | -0.435034 | H    | 2.708900  | -4.074764 | 1.056804  |
| O    | 2.758010  | -2.671828 | -0.486775 | H    | -2.670779 | 0.937326  | 3.287105  |
| C    | 2.432271  | -3.971332 | -0.000562 | H    | -3.175511 | -0.758699 | 3.563638  |
| O    | -2.202588 | -0.385526 | 1.745141  | H    | -1.445968 | -0.326300 | 3.622464  |
| C    | -2.398299 | -0.116146 | 3.132331  | H    | -2.904323 | 0.020329  | -0.104758 |
| C    | -3.312504 | -0.056314 | 0.905657  | H    | -3.724801 | 0.922771  | 1.187181  |
| C    | -4.413140 | -1.123709 | 0.958696  | H    | -4.832697 | -1.193576 | 1.968279  |
| O    | -5.494934 | -0.789217 | 0.104632  | H    | -3.987120 | -2.105764 | 0.701829  |
| C    | -5.319620 | -1.204253 | -1.239136 | H    | -5.224111 | -2.299387 | -1.309672 |
| H    | 4.006890  | -0.985455 | -2.073682 | H    | -6.215698 | -0.891846 | -1.782491 |
| H    | 5.406666  | -0.725239 | -0.992636 | H    | -4.439886 | -0.749563 | -1.715472 |
| H    | 4.718670  | -3.118688 | -1.019131 |      |           |           |           |

**Table 5 (Continued).**

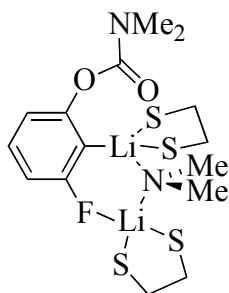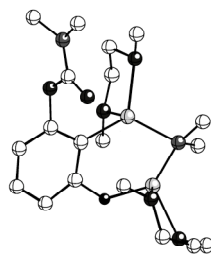

**A45**  
 $G^\circ = -1420.437512$   
 See pg S81  
 S = OMe

| Atom | X         | Y         | Z         | Atom | X         | Y         | Z         |
|------|-----------|-----------|-----------|------|-----------|-----------|-----------|
| C    | -0.761677 | -1.735954 | 2.870188  | H    | 0.375839  | 4.677783  | 0.335043  |
| C    | 0.416832  | -2.451097 | 3.097135  | H    | 0.450157  | -3.226549 | 3.857547  |
| C    | 1.551088  | -2.156851 | 2.337171  | H    | -1.669034 | -1.924585 | 3.436882  |
| C    | 1.472164  | -1.147935 | 1.374673  | H    | 2.482398  | -2.694567 | 2.493327  |
| C    | 0.346737  | -0.377496 | 1.082896  | H    | -2.703198 | 2.888754  | -0.103472 |
| C    | -0.708526 | -0.759048 | 1.883188  | H    | -1.776310 | 3.581803  | -1.454733 |
| F    | -1.953220 | -0.079451 | 1.668385  | H    | -3.296325 | 2.741633  | -1.771257 |
| Li   | -2.274383 | -0.142586 | -0.281947 | H    | -2.202412 | 1.161659  | -3.298084 |
| O    | -2.203379 | -2.075989 | -1.002974 | H    | -0.668250 | 2.003396  | -3.055483 |
| C    | -1.126932 | -3.007726 | -0.837183 | H    | -0.782803 | 0.255982  | -2.730300 |
| C    | -3.481245 | -2.683305 | -0.899459 | H    | 4.806569  | -0.068673 | 0.709739  |
| O    | -4.333769 | -0.563196 | -0.265333 | H    | 5.930401  | -1.371239 | 0.252990  |
| C    | -5.233847 | 0.521739  | -0.466757 | H    | 5.835411  | 0.104419  | -0.732673 |
| C    | -4.524708 | -1.625618 | -1.192167 | H    | 5.199974  | -1.142960 | -2.796646 |
| Li   | -0.015108 | 1.429947  | -0.074516 | H    | 5.291213  | -2.705226 | -1.949324 |
| N    | -1.666821 | 1.442761  | -1.230998 | H    | 3.763882  | -2.203781 | -2.714914 |
| C    | -2.378805 | 2.697429  | -1.138466 | H    | 3.094888  | 1.345899  | -1.321168 |
| C    | -1.319419 | 1.210377  | -2.619062 | H    | 1.833903  | 1.500093  | -2.577207 |
| O    | 0.198649  | 2.920135  | 1.421036  | H    | 3.006956  | 2.826592  | -2.333520 |
| C    | -0.849249 | 3.315334  | 2.294203  | H    | -1.401716 | 2.408319  | 2.543923  |
| C    | 0.989894  | 3.993232  | 0.940354  | H    | -0.442284 | 3.765768  | 3.211020  |
| C    | 2.098986  | 3.392542  | 0.098755  | H    | -1.522343 | 4.033949  | 1.806208  |
| O    | 1.489379  | 2.619134  | -0.924434 | H    | -5.106586 | 0.956348  | -1.466523 |
| C    | 2.419944  | 2.042493  | -1.833828 | H    | -6.273446 | 0.189232  | -0.337054 |
| O    | 2.706824  | -0.864488 | 0.709089  | H    | -4.995930 | 1.275492  | 0.285117  |
| C    | 2.936693  | -1.473524 | -0.479891 | H    | -1.181324 | -3.482618 | 0.150964  |
| O    | 2.132053  | -2.170315 | -1.078147 | H    | -1.180306 | -3.778047 | -1.618783 |
| N    | 4.198352  | -1.183375 | -0.955749 | H    | -0.191464 | -2.456189 | -0.920060 |
| C    | 5.246057  | -0.599453 | -0.131936 | H    | -5.533584 | -2.053134 | -1.086771 |
| C    | 4.637968  | -1.847734 | -2.171806 | H    | -4.407733 | -1.249956 | -2.220157 |
| H    | 2.745369  | 2.753795  | 0.719351  | H    | -3.578611 | -3.505510 | -1.625162 |
| H    | 2.711410  | 4.197124  | -0.337545 | H    | -3.624735 | -3.095951 | 0.111365  |
| H    | 1.426983  | 4.561546  | 1.776573  |      |           |           |           |

Table 5 (Continued).

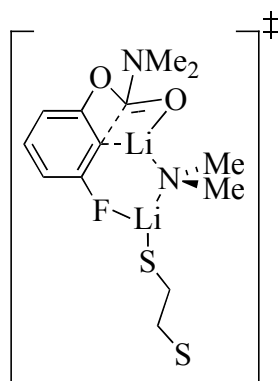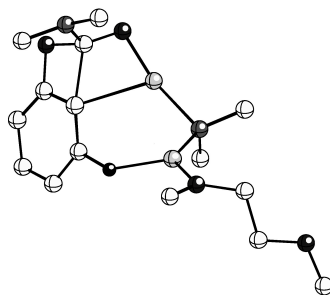

**A46**  
 $G^\circ = -1111.647492$   
 See pg S82  
 S = OMe

| Atom | X         | Y         | Z         | Atom | X         | Y         | Z         |
|------|-----------|-----------|-----------|------|-----------|-----------|-----------|
| C    | -1.600313 | 2.430939  | -1.450158 | H    | -3.321850 | -1.474070 | -2.078176 |
| C    | -2.834707 | 3.006811  | -1.130302 | H    | -1.607588 | -2.958982 | -0.629898 |
| C    | -3.802114 | 2.321564  | -0.377828 | H    | -2.174416 | -3.330450 | 1.023798  |
| C    | -3.459937 | 1.036354  | 0.030419  | H    | -2.997843 | -4.045593 | -0.384261 |
| C    | -2.245276 | 0.405967  | -0.252092 | H    | 2.709881  | -0.116636 | 2.816241  |
| C    | -1.356784 | 1.133351  | -0.994229 | H    | 1.320357  | -0.156787 | 3.902149  |
| O    | -4.159350 | 0.115201  | 0.737603  | H    | 1.488406  | -1.400025 | 2.648063  |
| C    | -3.022978 | -0.920187 | 0.729080  | H    | 0.463865  | 2.513611  | 1.507290  |
| O    | -2.459665 | -1.121550 | 1.849687  | H    | 0.715500  | 2.159138  | 3.228134  |
| Li   | -1.040681 | -0.024355 | 1.931872  | H    | 2.100433  | 2.210466  | 2.133985  |
| N    | 0.849842  | 0.469508  | 1.895974  | H    | 1.442400  | -0.921419 | -2.643879 |
| Li   | 1.136087  | 0.106508  | 0.029186  | H    | 3.186683  | -0.692959 | -2.939824 |
| O    | 2.549436  | -0.757755 | -0.944990 | H    | 2.577386  | -2.276764 | -2.368586 |
| C    | 2.444124  | -1.189784 | -2.305504 | H    | 4.180278  | -2.018754 | -0.659959 |
| C    | 3.808821  | -1.045500 | -0.316915 | H    | 3.614940  | -1.105901 | 0.756467  |
| C    | 1.617921  | -0.325762 | 2.846335  | F    | -0.093082 | 0.578883  | -1.323565 |
| C    | 1.039854  | 1.884788  | 2.202558  | C    | 4.840132  | 0.045807  | -0.595675 |
| N    | -3.438456 | -2.038931 | -0.020260 | H    | 4.991999  | 0.177643  | -1.681085 |
| C    | -4.050094 | -1.812548 | -1.319511 | H    | 4.479470  | 1.007204  | -0.192556 |
| C    | -2.499185 | -3.149728 | -0.000116 | O    | 6.033930  | -0.359190 | 0.033740  |
| H    | -0.856750 | 2.964278  | -2.033433 | C    | 7.072714  | 0.594089  | -0.081241 |
| H    | -4.759782 | 2.771262  | -0.137428 | H    | 6.794521  | 1.553189  | 0.382310  |
| H    | -3.046637 | 4.014879  | -1.476488 | H    | 7.338310  | 0.778326  | -1.134259 |
| H    | -4.496979 | -2.750201 | -1.665766 | H    | 7.941295  | 0.184287  | 0.439456  |
| H    | -4.839939 | -1.066794 | -1.230629 |      |           |           |           |



Table 5 (Continued).

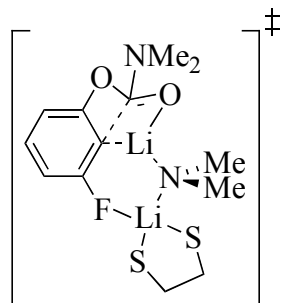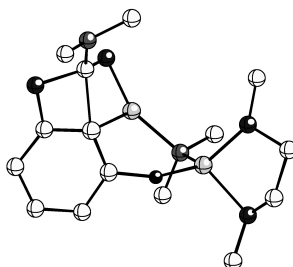

A47  
 $G^\circ = -1111.6585722$   
 See pg S82  
 S = OMe

| Atom | X         | Y         | Z         | Atom | X         | Y         | Z         |
|------|-----------|-----------|-----------|------|-----------|-----------|-----------|
| C    | 0.983124  | -2.671379 | -1.037359 | H    | 2.553756  | 3.900638  | -1.087901 |
| C    | 2.233627  | -3.193846 | -0.690139 | H    | -3.056584 | 0.178020  | 3.042059  |
| C    | 3.231532  | -2.402459 | -0.099575 | H    | -1.647148 | 0.284888  | 4.102736  |
| C    | 2.902110  | -1.067566 | 0.113272  | H    | -1.887572 | 1.503476  | 2.837979  |
| C    | 1.675716  | -0.485279 | -0.212628 | H    | -0.699267 | -2.378673 | 1.765454  |
| C    | 0.748448  | -1.316971 | -0.782319 | H    | -0.944527 | -1.984589 | 3.478360  |
| O    | 3.637654  | -0.052791 | 0.635851  | H    | -2.342594 | -2.146206 | 2.412128  |
| C    | 2.527720  | 0.992139  | 0.507555  | F    | -0.526139 | -0.823984 | -1.116312 |
| O    | 2.006951  | 1.389010  | 1.594597  | O    | -3.507465 | -0.806379 | -0.590937 |
| Li   | 0.644170  | 0.226897  | 1.865115  | C    | -3.894654 | 0.130388  | -1.592502 |
| N    | -1.191285 | -0.348802 | 2.097934  | H    | -3.257091 | 0.012869  | -2.481517 |
| Li   | -1.782639 | -0.122706 | 0.248592  | H    | -4.941996 | -0.030410 | -1.886517 |
| C    | -1.971694 | 0.427334  | 3.050669  | C    | -3.733768 | 1.516906  | -1.001477 |
| C    | -1.298258 | -1.759773 | 2.450167  | H    | -3.954383 | 2.276224  | -1.765978 |
| N    | 2.928105  | 1.953926  | -0.438621 | H    | -4.425425 | 1.657584  | -0.157535 |
| C    | 3.474456  | 1.498879  | -1.706612 | O    | -2.388606 | 1.637783  | -0.550941 |
| C    | 2.034633  | 3.094018  | -0.559311 | C    | -2.095479 | 2.906486  | 0.033686  |
| H    | 0.217054  | -3.291149 | -1.492596 | H    | -2.744511 | 3.097226  | 0.898223  |
| H    | 4.200205  | -2.812362 | 0.166868  | H    | -1.054350 | 2.873754  | 0.357348  |
| H    | 2.433593  | -4.244682 | -0.882658 | H    | -2.224973 | 3.707443  | -0.705986 |
| H    | 3.933285  | 2.351698  | -2.217830 | C    | -3.642767 | -2.166601 | -0.998014 |
| H    | 4.244913  | 0.749124  | -1.528338 | H    | -4.691784 | -2.397396 | -1.224918 |
| H    | 2.702973  | 1.069303  | -2.369430 | H    | -3.022409 | -2.374939 | -1.879844 |
| H    | 1.116006  | 2.850384  | -1.127640 | H    | -3.308123 | -2.778986 | -0.159244 |
| H    | 1.757133  | 3.439553  | 0.436227  |      |           |           |           |

**Table 5 (Continued).**

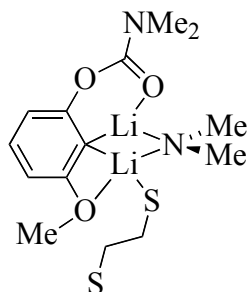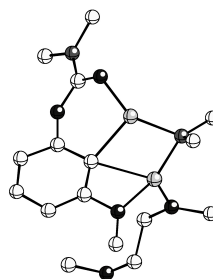

**A48**  
 $G^\circ = -1126.938909$   
 See pg S83  
 S = OMe

| Atom | X         | Y         | Z         | Atom | X         | Y         | Z         |
|------|-----------|-----------|-----------|------|-----------|-----------|-----------|
| C    | 1.085514  | -1.838118 | 2.372796  | H    | 0.521308  | 3.185447  | 2.580925  |
| C    | 0.098353  | -2.826128 | 2.266571  | H    | 1.114146  | 4.534795  | 1.586672  |
| C    | -1.025788 | -2.606452 | 1.479291  | H    | -0.575943 | 4.499229  | 2.102068  |
| C    | -1.128506 | -1.380007 | 0.809221  | H    | -1.296538 | 4.639466  | -0.275901 |
| C    | -0.209444 | -0.342306 | 0.853295  | H    | 0.391328  | 4.666043  | -0.795396 |
| C    | 0.891469  | -0.644308 | 1.674205  | H    | -0.706933 | 3.414054  | -1.419128 |
| Li   | -1.295143 | 1.549314  | 0.836780  | H    | -3.587792 | -2.446412 | -1.453719 |
| O    | -2.974881 | 0.775194  | 0.532782  | H    | -5.344993 | -2.198161 | -1.301683 |
| C    | -3.113226 | -0.283091 | -0.097985 | H    | -4.477148 | -1.566901 | -2.719696 |
| O    | -2.284539 | -1.334739 | -0.038729 | H    | -5.280839 | 0.770251  | -2.185737 |
| N    | -4.159883 | -0.496144 | -0.940797 | H    | -6.135308 | 0.208389  | -0.728728 |
| C    | -5.164529 | 0.542007  | -1.118996 | H    | -4.853154 | 1.438912  | -0.587325 |
| C    | -4.401183 | -1.750198 | -1.640455 | H    | 2.412950  | 3.210007  | -1.718037 |
| Li   | 1.036954  | 1.508878  | 0.213305  | H    | 2.212071  | 2.289622  | -3.234506 |
| O    | 2.055076  | 1.231906  | -1.448553 | H    | 2.012258  | -0.030456 | -3.103145 |
| C    | 2.139963  | -0.082555 | -2.013667 | H    | 1.298488  | -0.635054 | -1.588538 |
| C    | 3.466575  | -0.768831 | -1.666508 | H    | 3.598300  | -0.770796 | -0.573171 |
| O    | 3.525203  | -2.081835 | -2.193265 | H    | 4.308043  | -0.222788 | -2.107662 |
| C    | 2.880597  | -3.057486 | -1.389372 | H    | 1.798358  | -2.890547 | -1.299194 |
| C    | 2.644472  | 2.271592  | -2.225450 | H    | 3.048705  | -4.022140 | -1.875277 |
| H    | 3.732801  | 2.154216  | -2.300893 | H    | 3.308850  | -3.086515 | -0.375764 |
| N    | -0.089091 | 3.069825  | 0.566801  | O    | 1.839975  | 0.394583  | 1.713939  |
| C    | -0.435841 | 3.975020  | -0.510826 | C    | 2.955120  | 0.290347  | 2.584482  |
| C    | 0.251776  | 3.847905  | 1.743917  | H    | 3.609829  | -0.545209 | 2.303296  |
| H    | 0.214300  | -3.764570 | 2.802161  | H    | 3.506106  | 1.228317  | 2.490443  |
| H    | 1.961459  | -2.017934 | 2.987589  | H    | 2.632881  | 0.159960  | 3.624914  |
| H    | -1.804752 | -3.356783 | 1.380634  |      |           |           |           |

**Table 5 (Continued).**

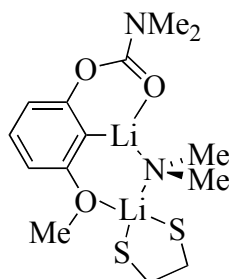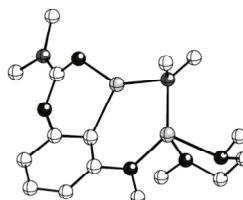

**A49**  
 $G^\circ = -1126.945642$   
 See pg S83  
 S = OMe

| Atom | X         | Y         | Z         | Atom | X         | Y         | Z         |
|------|-----------|-----------|-----------|------|-----------|-----------|-----------|
| C    | -0.207049 | 3.409903  | -0.647079 | H    | -1.877864 | 4.773487  | -0.588460 |
| C    | -1.560216 | 3.738358  | -0.494321 | H    | 0.509108  | 4.196790  | -0.859510 |
| C    | -2.491745 | 2.744262  | -0.223849 | H    | -3.546563 | 2.971899  | -0.099417 |
| C    | -2.025178 | 1.427428  | -0.113248 | H    | 1.372365  | -0.825981 | -3.083845 |
| C    | -0.712004 | 1.005609  | -0.246559 | H    | 2.537951  | -2.149892 | -2.866469 |
| C    | 0.161952  | 2.067731  | -0.522988 | H    | 0.848754  | -2.519843 | -3.218821 |
| Li   | -0.571659 | -0.969025 | -0.951170 | H    | 0.705797  | -3.890764 | -1.161794 |
| O    | -2.418672 | -1.320465 | -0.916940 | H    | 2.388816  | -3.529485 | -0.773278 |
| C    | -3.197463 | -0.733922 | -0.153009 | H    | 1.107906  | -3.139091 | 0.397883  |
| O    | -3.090008 | 0.534592  | 0.257653  | H    | -4.914475 | 0.284881  | 1.527432  |
| N    | -4.296186 | -1.350580 | 0.372501  | H    | -6.211979 | -0.477303 | 0.575088  |
| C    | -4.614878 | -2.709884 | -0.037799 | H    | -5.578343 | -1.288980 | 2.024933  |
| C    | -5.304329 | -0.663731 | 1.166858  | H    | -4.854507 | -3.314854 | 0.844779  |
| Li   | 1.777413  | -0.250322 | -0.135895 | H    | -5.482565 | -2.723402 | -0.712384 |
| O    | 3.936737  | -0.327390 | 0.142615  | H    | -3.757483 | -3.139563 | -0.552119 |
| C    | 4.632111  | -0.944712 | -0.939493 | H    | 1.294264  | 1.303847  | 3.032368  |
| C    | 4.081587  | -1.044466 | 1.363633  | H    | 0.009164  | 0.316038  | 2.285322  |
| C    | 3.219802  | -0.363963 | 2.406448  | H    | 0.871438  | -0.283108 | 3.749878  |
| O    | 1.882304  | -0.366711 | 1.931530  | H    | 4.450174  | -0.333732 | -1.825193 |
| C    | 0.964318  | 0.279311  | 2.810269  | H    | 5.711522  | -0.978775 | -0.733890 |
| H    | 3.559789  | 0.670620  | 2.569239  | H    | 4.252591  | -1.957249 | -1.118570 |
| H    | 3.295009  | -0.906884 | 3.361351  | O    | 1.509926  | 1.672436  | -0.663401 |
| H    | 5.133144  | -1.044559 | 1.690002  | C    | 2.489032  | 2.656791  | -0.957587 |
| H    | 3.757141  | -2.085968 | 1.224640  | H    | 2.286118  | 3.144606  | -1.919372 |
| N    | 1.190929  | -1.794123 | -1.220013 | H    | 2.538539  | 3.421352  | -0.171093 |
| C    | 1.496341  | -1.825153 | -2.637626 | H    | 3.444196  | 2.131012  | -1.005777 |
| C    | 1.352257  | -3.125869 | -0.675452 |      |           |           |           |

**Table 5 (Continued).**

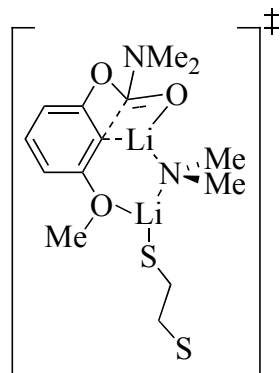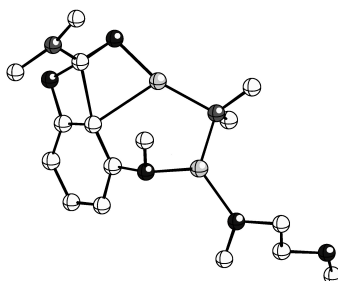

**A50**  
 $G^\circ = -1126.893815$   
 See pg S140  
 S = OMe

| Atom | X         | Y         | Z         | Atom | X         | Y         | Z         |
|------|-----------|-----------|-----------|------|-----------|-----------|-----------|
| C    | -0.387250 | -2.374388 | 0.052222  | H    | -4.298171 | 2.696618  | 0.521563  |
| C    | -0.924750 | -2.982971 | -1.085527 | H    | -5.691449 | 1.937044  | 1.330609  |
| C    | -2.020433 | -2.436241 | -1.769978 | H    | 2.145861  | 3.269378  | 0.088572  |
| C    | -2.535124 | -1.257534 | -1.239380 | H    | 0.733859  | 3.891417  | -0.769443 |
| C    | -2.047728 | -0.604760 | -0.106457 | H    | 0.543567  | 3.202566  | 0.854448  |
| C    | -0.961432 | -1.179140 | 0.531221  | H    | 1.349908  | 0.623040  | -2.364405 |
| O    | -3.560360 | -0.486446 | -1.681888 | H    | 1.208720  | 2.365283  | -2.675973 |
| C    | -3.381009 | 0.613147  | -0.640530 | H    | 2.623841  | 1.740901  | -1.827096 |
| O    | -2.890870 | 1.704446  | -1.064854 | H    | 2.016844  | -1.598206 | 2.592798  |
| Li   | -1.101504 | 1.456421  | -0.963937 | H    | 3.640665  | -2.052992 | 2.002056  |
| N    | 0.814076  | 1.741164  | -0.650075 | H    | 3.467240  | -0.778081 | 3.245434  |
| Li   | 1.148096  | 0.279925  | 0.572786  | H    | 4.695797  | 0.593196  | 1.791093  |
| O    | 2.841969  | -0.234046 | 1.336107  | H    | 3.747448  | 1.392698  | 0.516403  |
| C    | 3.013321  | -1.224853 | 2.351600  | C    | 4.795179  | -0.374297 | -0.144865 |
| C    | 4.048508  | 0.423844  | 0.921497  | H    | 5.021867  | -1.394186 | 0.211570  |
| C    | 1.068573  | 3.068644  | -0.103606 | H    | 4.166276  | -0.468174 | -1.045262 |
| C    | 1.522489  | 1.614882  | -1.919843 | O    | 5.981499  | 0.336707  | -0.418691 |
| N    | -4.525478 | 0.656255  | 0.167371  | C    | 6.751595  | -0.246556 | -1.451634 |
| C    | -5.044731 | -0.581828 | 0.718869  | H    | 6.194593  | -0.283288 | -2.400516 |
| C    | -4.640887 | 1.807119  | 1.048433  | H    | 7.068664  | -1.269257 | -1.192377 |
| H    | 0.441681  | -2.829996 | 0.587808  | H    | 7.637808  | 0.379102  | -1.581675 |
| H    | -2.434385 | -2.906559 | -2.655920 | O    | -0.299979 | -0.590504 | 1.629134  |
| H    | -0.482692 | -3.909611 | -1.442993 | C    | -1.097115 | 0.262361  | 2.463285  |
| H    | -6.059600 | -0.405588 | 1.090677  | H    | -1.430969 | 1.152870  | 1.921873  |
| H    | -5.089587 | -1.343086 | -0.059770 | H    | -1.970971 | -0.283302 | 2.831937  |
| H    | -4.430982 | -0.963800 | 1.553925  | H    | -0.456036 | 0.552393  | 3.298795  |
| H    | -4.053060 | 1.692817  | 1.977944  |      |           |           |           |

Table 5 (Continued).

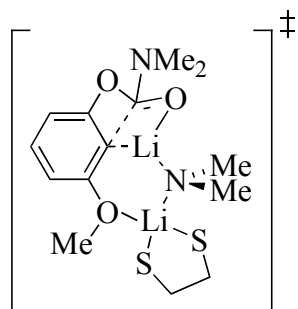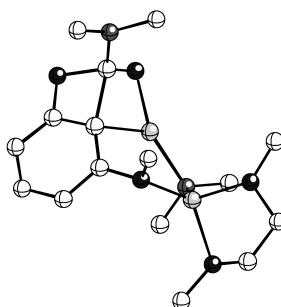

**A51**  
 $G^\circ = -1126.902988$   
 See pg. S83  
 S = OMe

| Atom | X         | Y         | Z         | Atom | X         | Y         | Z         |
|------|-----------|-----------|-----------|------|-----------|-----------|-----------|
| C    | -0.829353 | 2.622393  | -0.908856 | H    | 1.570953  | -0.886668 | 3.981263  |
| C    | -1.962500 | 3.293871  | -0.440267 | H    | 1.729344  | -1.962946 | 2.583453  |
| C    | -3.020544 | 2.611577  | 0.180155  | H    | 0.780127  | 2.081166  | 1.993572  |
| C    | -2.866542 | 1.234266  | 0.296935  | H    | 0.982665  | 1.461018  | 3.644001  |
| C    | -1.761200 | 0.512182  | -0.151555 | H    | 2.401573  | 1.682530  | 2.615144  |
| C    | -0.741790 | 1.227078  | -0.755479 | C    | 4.343087  | 0.069293  | -1.058728 |
| O    | -3.704605 | 0.311287  | 0.843174  | O    | 3.568470  | 0.911146  | -0.215813 |
| C    | -2.787081 | -0.874627 | 0.625587  | H    | 4.041603  | 0.205027  | -2.108985 |
| O    | -2.245122 | -1.363965 | 1.661488  | H    | 5.412732  | 0.310870  | -0.970276 |
| Li   | -0.708328 | -0.403852 | 1.768582  | C    | 4.103594  | -1.360957 | -0.618505 |
| N    | 1.162156  | 0.003777  | 2.067264  | H    | 4.646200  | -2.050997 | -1.281519 |
| Li   | 1.759034  | 0.030704  | 0.196457  | H    | 4.457798  | -1.510118 | 0.411719  |
| C    | 1.886237  | -0.926128 | 2.917210  | O    | 2.700624  | -1.603987 | -0.687124 |
| C    | 1.338322  | 1.349782  | 2.597649  | C    | 2.343237  | -2.940885 | -0.336418 |
| N    | -3.382350 | -1.750376 | -0.300833 | H    | 2.660412  | -3.174944 | 0.687128  |
| C    | -3.966433 | -1.196993 | -1.509950 | H    | 1.255953  | -3.007375 | -0.403102 |
| C    | -2.661675 | -2.995010 | -0.504088 | H    | 2.798527  | -3.655430 | -1.035268 |
| H    | -0.019400 | 3.164939  | -1.389342 | C    | 3.703356  | 2.298789  | -0.509218 |
| H    | -3.900144 | 3.132659  | 0.544730  | H    | 4.748117  | 2.616878  | -0.394660 |
| H    | -2.023687 | 4.372885  | -0.558813 | H    | 3.363914  | 2.518757  | -1.530619 |
| H    | -4.577641 | -1.967568 | -1.991750 | H    | 3.080212  | 2.833247  | 0.208998  |
| H    | -4.609071 | -0.354342 | -1.256059 | O    | 0.439751  | 0.589360  | -1.206276 |
| H    | -3.203554 | -0.856390 | -2.232701 | C    | 0.281523  | -0.074646 | -2.466217 |
| H    | -1.756105 | -2.860681 | -1.129276 | H    | 0.055596  | 0.654435  | -3.253662 |
| H    | -2.362834 | -3.399819 | 0.462135  | H    | 1.226514  | -0.578126 | -2.679386 |
| H    | -3.316893 | -3.711374 | -1.010914 | H    | -0.527311 | -0.811391 | -2.412303 |
| H    | 2.987273  | -0.751239 | 2.933236  |      |           |           |           |

**Table 5 (Continued).**

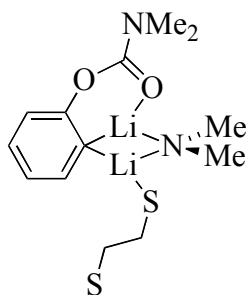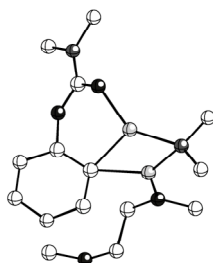

**A52**  
 $G^\circ = -1012.433018$   
 See pg S84  
 S = OMe

| Atom | X         | Y         | Z         | Atom | X         | Y         | Z         |
|------|-----------|-----------|-----------|------|-----------|-----------|-----------|
| C    | 1.280377  | -1.898088 | 2.604000  | H    | 2.060412  | -2.031930 | 3.351130  |
| C    | 0.517531  | -2.990362 | 2.187009  | H    | -1.108391 | -3.620974 | 0.897831  |
| C    | -0.488660 | -2.796019 | 1.239827  | H    | 0.443073  | 3.002048  | 2.786520  |
| C    | -0.683878 | -1.510411 | 0.734595  | H    | 0.659157  | 4.461530  | 1.795115  |
| C    | 0.038923  | -0.367119 | 1.078803  | H    | -0.855586 | 4.207156  | 2.668765  |
| C    | 1.027271  | -0.631973 | 2.060986  | H    | -2.122635 | 4.394096  | 0.536128  |
| Li   | -1.484854 | 1.226744  | 1.348404  | H    | -0.612321 | 4.648690  | -0.344472 |
| O    | -2.912886 | 0.198955  | 0.687217  | H    | -1.693220 | 3.316759  | -0.809223 |
| C    | -2.742853 | -0.644487 | -0.206744 | H    | -2.613126 | -2.449862 | -2.063214 |
| O    | -1.689344 | -1.469866 | -0.293084 | H    | -4.379066 | -2.467660 | -2.293289 |
| N    | -3.633840 | -0.826817 | -1.216838 | H    | -3.370742 | -1.350304 | -3.240526 |
| C    | -4.813251 | 0.022228  | -1.303212 | H    | -4.825997 | 0.555088  | -2.262617 |
| C    | -3.485235 | -1.831737 | -2.260382 | H    | -5.724532 | -0.585453 | -1.232627 |
| Li   | 0.585178  | 1.555117  | 0.243910  | H    | -4.796961 | 0.743518  | -0.488628 |
| O    | 2.049299  | 1.605921  | -1.006332 | H    | 2.098684  | 3.634019  | -0.985297 |
| C    | 2.577737  | 0.403415  | -1.584992 | H    | 2.578112  | 2.904299  | -2.546018 |
| C    | 3.865018  | -0.062222 | -0.893625 | H    | 2.753779  | 0.555558  | -2.658114 |
| O    | 4.314100  | -1.285349 | -1.448502 | H    | 1.793825  | -0.347358 | -1.461309 |
| C    | 3.737083  | -2.436272 | -0.848863 | H    | 3.685848  | -0.153509 | 0.188136  |
| C    | 2.653852  | 2.819243  | -1.454098 | H    | 4.671393  | 0.664025  | -1.046376 |
| H    | 3.707642  | 2.878061  | -1.157500 | H    | 2.644034  | -2.469936 | -0.956386 |
| N    | -0.602768 | 2.931083  | 0.953863  | H    | 4.168954  | -3.301648 | -1.358162 |
| C    | -1.277743 | 3.851788  | 0.058895  | H    | 3.977412  | -2.491216 | 0.222998  |
| C    | -0.073970 | 3.675077  | 2.084149  | H    | 1.639793  | 0.195430  | 2.431005  |
| H    | 0.693177  | -3.981517 | 2.597523  |      |           |           |           |

**Table 5 (Continued).**

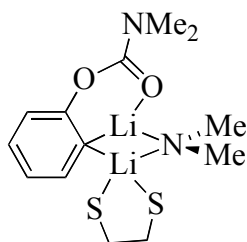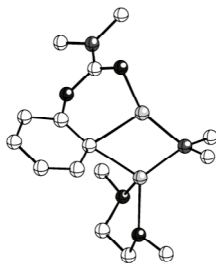

**A53**  
 $G^\circ = -1012.440900$   
 See pg S84  
 S = OMe

| Atom | X         | Y         | Z         | Atom | X         | Y         | Z         |
|------|-----------|-----------|-----------|------|-----------|-----------|-----------|
| C    | 0.521290  | 3.415230  | -1.393676 | C    | 2.056642  | -2.229893 | -2.436419 |
| C    | -0.755301 | 3.837827  | -1.018522 | C    | 0.966452  | -3.352291 | -0.674071 |
| C    | -1.647483 | 2.906395  | -0.488255 | H    | -1.058640 | 4.874706  | -1.140353 |
| C    | -1.218384 | 1.586293  | -0.345284 | H    | 1.227802  | 4.127575  | -1.816142 |
| C    | 0.036938  | 1.075431  | -0.678341 | H    | -2.652539 | 3.193920  | -0.189586 |
| C    | 0.882802  | 2.072438  | -1.229663 | H    | 2.227824  | -1.266518 | -2.944361 |
| Li   | -0.342259 | -0.879484 | -1.572533 | H    | 3.060244  | -2.637740 | -2.172881 |
| O    | -2.210854 | -0.873082 | -1.303970 | H    | 1.657958  | -2.927043 | -3.206654 |
| C    | -2.683069 | -0.352553 | -0.282876 | H    | 0.507656  | -4.104394 | -1.353622 |
| O    | -2.217693 | 0.762159  | 0.297613  | H    | 1.903934  | -3.825752 | -0.303558 |
| N    | -3.748094 | -0.882890 | 0.379445  | H    | 0.295649  | -3.261050 | 0.195013  |
| C    | -4.356202 | -2.114754 | -0.101696 | H    | -3.868006 | 0.664472  | 1.786201  |
| C    | -4.386204 | -0.255392 | 1.527344  | H    | -5.435392 | -0.025828 | 1.298030  |
| Li   | 1.514568  | -0.541037 | -0.062000 | H    | -4.366627 | -0.935257 | 2.389121  |
| O    | 3.424988  | 0.166269  | 0.275438  | H    | -4.383290 | -2.860351 | 0.703008  |
| C    | 4.556359  | -0.226095 | -0.494573 | H    | -5.385693 | -1.928767 | -0.435412 |
| C    | 3.689832  | 0.236194  | 1.670872  | H    | -3.772970 | -2.500926 | -0.935301 |
| C    | 2.379375  | 0.519119  | 2.375508  | H    | -0.300046 | 0.493575  | 2.370436  |
| O    | 1.484096  | -0.535989 | 2.040074  | H    | -0.368333 | -1.289856 | 2.380199  |
| C    | 0.217508  | -0.420478 | 2.683862  | H    | 0.341408  | -0.428426 | 3.775963  |
| H    | 1.963605  | 1.482965  | 2.047360  | H    | 4.228543  | -0.289205 | -1.532416 |
| H    | 2.543408  | 0.554645  | 3.463193  | H    | 5.361693  | 0.515896  | -0.403630 |
| H    | 4.414653  | 1.035465  | 1.887686  | H    | 4.927348  | -1.208409 | -0.172269 |
| H    | 4.107279  | -0.720549 | 2.019662  | H    | 1.889731  | 1.790784  | -1.546049 |
| N    | 1.177847  | -2.060260 | -1.296379 |      |           |           |           |

Table 5 (Continued).

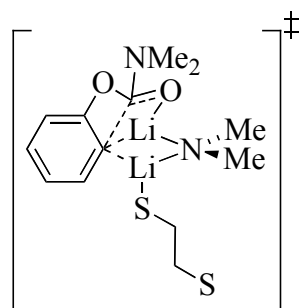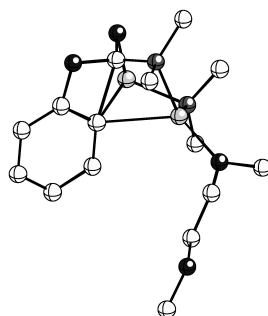

**A54**  
 $G^\circ = -1012.383881$   
 See pg S84  
 S = OMe

| Atom | X         | Y         | Z         | Atom | X         | Y         | Z         |
|------|-----------|-----------|-----------|------|-----------|-----------|-----------|
| C    | 0.609726  | 2.665393  | 1.855775  | H    | -3.274332 | -1.711418 | -1.476906 |
| C    | 0.094826  | 3.779341  | 1.189044  | H    | -3.330738 | -0.712185 | -2.948300 |
| C    | -0.914063 | 3.652910  | 0.220412  | H    | -2.092445 | -1.984770 | -2.784725 |
| C    | -1.357380 | 2.362060  | -0.026094 | H    | -1.487209 | -4.046891 | 1.024253  |
| C    | -0.871213 | 1.215284  | 0.601622  | H    | -2.679531 | -3.477982 | 2.193820  |
| C    | 0.129645  | 1.371279  | 1.565805  | H    | -2.784532 | -2.948044 | 0.503335  |
| O    | -2.327506 | 1.953990  | -0.900557 | H    | 0.241151  | -1.428252 | 2.984274  |
| C    | -2.312921 | 0.521227  | -0.562678 | H    | -0.954040 | -2.561236 | 3.641167  |
| O    | -3.298646 | 0.063339  | 0.063978  | H    | 0.291006  | -3.144936 | 2.536613  |
| Li   | -2.335655 | -0.362907 | 1.577950  | H    | 0.714038  | -3.479356 | 0.206459  |
| N    | -1.256636 | -1.978151 | 1.594851  | H    | 1.850923  | -3.654450 | -1.170164 |
| Li   | -0.452967 | -1.090554 | -0.006217 | H    | 2.446803  | -3.135985 | 0.437363  |
| O    | 1.314744  | -1.719967 | -0.614827 | H    | 2.961284  | -1.691004 | -1.884559 |
| C    | 1.610113  | -3.077669 | -0.267815 | H    | 1.964776  | -0.224189 | -1.835521 |
| C    | 2.402948  | -1.015874 | -1.223596 | H    | 0.544954  | 0.520684  | 2.103979  |
| C    | -2.077679 | -3.149825 | 1.320083  | C    | 3.341950  | -0.404114 | -0.185697 |
| C    | -0.393433 | -2.287019 | 2.722621  | H    | 2.797393  | 0.342728  | 0.413788  |
| N    | -1.722434 | -0.298657 | -1.594663 | H    | 3.719062  | -1.177613 | 0.505143  |
| C    | -0.877671 | 0.396441  | -2.572805 | O    | 4.403227  | 0.189121  | -0.903310 |
| C    | -2.666381 | -1.228671 | -2.239597 | C    | 5.322323  | 0.864648  | -0.067969 |
| H    | 1.383319  | 2.798023  | 2.608293  | H    | 4.837782  | 1.679917  | 0.491346  |
| H    | -1.323968 | 4.515450  | -0.295917 | H    | 6.094979  | 1.285774  | -0.715939 |
| H    | 0.477576  | 4.768816  | 1.426893  | H    | 5.793926  | 0.178661  | 0.653703  |
| H    | -0.343497 | -0.353758 | -3.164989 | H    | -0.146450 | 1.022858  | -2.056831 |
| H    | -1.462171 | 1.032874  | -3.250039 |      |           |           |           |



**Table 5 (Continued).**

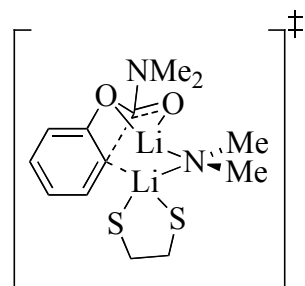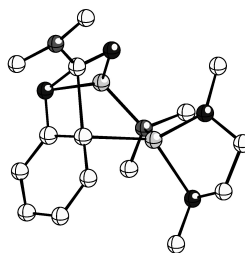

**A55**  
 $G^\circ = -1012.400729$   
 See pg S84  
 S = OMe

| Atom | X         | Y         | Z         | Atom | X         | Y         | Z         |
|------|-----------|-----------|-----------|------|-----------|-----------|-----------|
| C    | -0.679931 | 2.842215  | -1.529461 | H    | -3.943692 | -2.989855 | -1.210733 |
| C    | -1.277865 | 3.416517  | -0.404878 | H    | 3.256876  | -0.717644 | 2.299450  |
| C    | -1.808560 | 2.611745  | 0.615730  | H    | 2.371595  | -0.874719 | 3.820998  |
| C    | -1.676546 | 1.242872  | 0.433825  | H    | 1.973483  | -1.940990 | 2.459304  |
| C    | -1.065345 | 0.600902  | -0.637682 | H    | 0.862755  | 2.097918  | 2.285228  |
| C    | -0.580802 | 1.441390  | -1.649034 | H    | 1.682406  | 1.488290  | 3.739719  |
| O    | -2.211723 | 0.269309  | 1.287582  | H    | 2.595478  | 1.690708  | 2.242460  |
| C    | -1.986480 | -0.951745 | 0.488740  | O    | 2.747470  | 0.662282  | -0.734215 |
| O    | -1.199980 | -1.777941 | 1.016766  | C    | 3.113671  | -0.155673 | -1.836815 |
| Li   | -0.567691 | -0.553186 | 2.316816  | H    | 2.447077  | 0.042419  | -2.690202 |
| N    | 1.236546  | 0.023935  | 2.228521  | H    | 4.148988  | 0.051753  | -2.146842 |
| Li   | 1.081224  | -0.165758 | 0.220369  | C    | 2.995392  | -1.599144 | -1.389124 |
| C    | 2.241615  | -0.904930 | 2.718135  | H    | 3.179529  | -2.270368 | -2.241627 |
| C    | 1.605595  | 1.367841  | 2.637930  | H    | 3.734715  | -1.818661 | -0.604211 |
| N    | -3.117899 | -1.369682 | -0.188540 | O    | 1.681719  | -1.783731 | -0.881063 |
| C    | -4.000937 | -0.388900 | -0.802936 | C    | 1.409573  | -3.123384 | -0.467975 |
| C    | -2.954307 | -2.598427 | -0.955702 | H    | 2.139464  | -3.452322 | 0.284396  |
| H    | -0.299930 | 3.486290  | -2.320657 | H    | 0.409865  | -3.109844 | -0.034196 |
| H    | -2.309562 | 3.042503  | 1.478501  | H    | 1.447540  | -3.802529 | -1.330809 |
| H    | -1.352013 | 4.498251  | -0.323796 | C    | 2.959533  | 2.052667  | -0.960584 |
| H    | -4.946933 | -0.882234 | -1.046579 | H    | 4.024940  | 2.251575  | -1.141057 |
| H    | -4.203017 | 0.420836  | -0.102515 | H    | 2.367754  | 2.407485  | -1.813699 |
| H    | -3.567642 | 0.034336  | -1.722005 | H    | 2.638147  | 2.570059  | -0.056389 |
| H    | -2.392684 | -2.422015 | -1.888113 | H    | -0.121712 | 1.026579  | -2.548311 |
| H    | -2.422082 | -3.333799 | -0.353324 |      |           |           |           |

**Table 5 (Continued).**

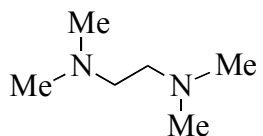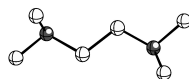

$$G^\circ = -347.557034$$

| Atom | X         | Y         | Z         |
|------|-----------|-----------|-----------|
| C    | -2.936402 | -0.711691 | -0.659111 |
| H    | -2.669726 | -1.216714 | -1.593644 |
| H    | -3.136598 | -1.488965 | 0.105899  |
| H    | -3.866922 | -0.157380 | -0.825188 |
| C    | -2.258336 | 0.964362  | 0.912787  |
| H    | -1.504543 | 1.720776  | 1.148262  |
| H    | -3.205232 | 1.483824  | 0.729427  |
| H    | -2.389286 | 0.320696  | 1.806625  |
| C    | -0.598439 | -0.480567 | -0.124398 |
| C    | 0.598431  | 0.480551  | -0.124384 |
| H    | -0.470842 | -1.150691 | -0.981694 |
| H    | -0.597912 | -1.116121 | 0.783684  |
| H    | 0.470835  | 1.150691  | -0.981667 |
| H    | 0.597895  | 1.116091  | 0.783710  |
| N    | -1.878067 | 0.214677  | -0.278431 |
| N    | 1.878065  | -0.214681 | -0.278430 |
| C    | 2.936381  | 0.711701  | -0.659126 |
| H    | 3.136576  | 1.488979  | 0.105880  |
| H    | 3.866906  | 0.157402  | -0.825216 |
| H    | 2.669683  | 1.216719  | -1.593656 |
| C    | 2.258366  | -0.964357 | 0.912784  |
| H    | 3.205272  | -1.483795 | 0.729412  |
| H    | 2.389311  | -0.320688 | 1.806620  |
| H    | 1.504596  | -1.720790 | 1.148268  |

**Table 5 (Continued).**

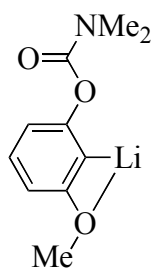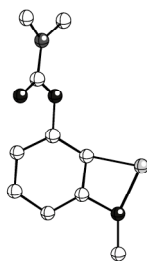

**A56**  
 $G^\circ = -676.071559$   
 See pg S85

| Atom | X         | Y         | Z         | Atom | X         | Y         | Z         |
|------|-----------|-----------|-----------|------|-----------|-----------|-----------|
| C    | -2.780773 | 1.145154  | -0.220583 | H    | -5.334379 | -1.714849 | 0.688299  |
| C    | -2.436753 | -0.189992 | -0.029009 | H    | -4.867906 | -0.086735 | 1.260605  |
| C    | -1.148796 | -0.728440 | -0.082312 | C    | 2.131704  | 0.217203  | 0.304683  |
| C    | -0.168507 | 0.211799  | -0.355814 | O    | 1.950971  | 1.022578  | 1.201122  |
| C    | -0.417641 | 1.573880  | -0.565357 | N    | 3.352042  | -0.327014 | -0.014699 |
| C    | -1.729817 | 2.031811  | -0.492600 | C    | 4.504495  | 0.026662  | 0.793092  |
| H    | -3.801582 | 1.510668  | -0.168132 | H    | 4.888346  | -0.849876 | 1.335230  |
| H    | 0.398623  | 2.259068  | -0.767803 | H    | 5.312575  | 0.415405  | 0.158532  |
| H    | -1.945336 | 3.085559  | -0.648102 | H    | 4.206667  | 0.790311  | 1.510160  |
| Li   | -1.980355 | -2.458450 | 0.373116  | C    | 3.563131  | -1.326959 | -1.046148 |
| O    | 1.153967  | -0.262261 | -0.517087 | H    | 4.362021  | -1.002737 | -1.727212 |
| O    | -3.421796 | -1.199977 | 0.260253  | H    | 3.866609  | -2.287865 | -0.604113 |
| C    | -4.773668 | -0.810112 | 0.441376  | H    | 2.648573  | -1.472885 | -1.615800 |
| H    | -5.182842 | -0.370373 | -0.476381 |      |           |           |           |

**Table 5 (Continued).**

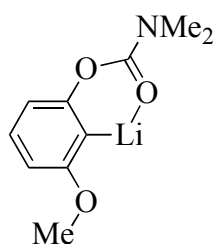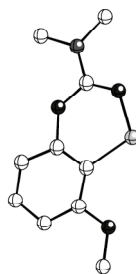

**A57**  
 $G^\circ = -676.095932$   
 See pg S85

| Atom | X         | Y         | Z         | Atom | X         | Y         | Z         |
|------|-----------|-----------|-----------|------|-----------|-----------|-----------|
| C    | -2.960875 | 1.073834  | 0.003639  | H    | -5.071028 | -2.176591 | -0.018239 |
| C    | -2.429060 | -0.221031 | -0.002951 | H    | -4.984217 | -0.638754 | 0.883460  |
| C    | -1.049992 | -0.498257 | -0.001629 | C    | 1.998039  | -0.453177 | -0.003135 |
| C    | -0.257523 | 0.631082  | 0.006701  | O    | 1.664375  | -1.656240 | 0.017418  |
| C    | -0.706529 | 1.959770  | 0.014285  | N    | 3.313132  | -0.093928 | -0.046485 |
| C    | -2.079396 | 2.163919  | 0.012545  | C    | 3.774827  | 1.287228  | -0.022795 |
| H    | -4.029731 | 1.260054  | 0.002502  | H    | 4.545359  | 1.425020  | -0.790627 |
| H    | -0.006118 | 2.789761  | 0.021648  | H    | 2.947110  | 1.962625  | -0.222264 |
| H    | -2.476997 | 3.175705  | 0.017894  | H    | 4.213799  | 1.535569  | 0.953381  |
| Li   | -0.058307 | -2.198981 | 0.011293  | C    | 4.347816  | -1.114470 | 0.021560  |
| O    | 1.190734  | 0.599448  | 0.009984  | H    | 5.047360  | -0.994110 | -0.814826 |
| O    | -3.233919 | -1.350452 | -0.010443 | H    | 4.913771  | -1.028924 | 0.959251  |
| C    | -4.636040 | -1.173928 | -0.011974 | H    | 3.887567  | -2.098746 | -0.031043 |
| H    | -4.981004 | -0.629030 | -0.902767 |      |           |           |           |

**Table 5 (Continued).**

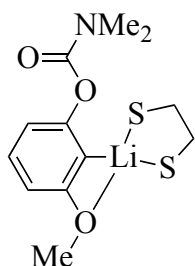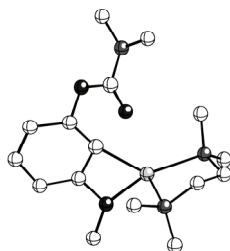

**A58**  
 $G^\circ = -1023.659337$   
 See pg S85  
 S = NMe<sub>2</sub>

| Atom | X         | Y         | Z         | Atom | X         | Y         | Z         |
|------|-----------|-----------|-----------|------|-----------|-----------|-----------|
| C    | -0.777355 | 3.641734  | -0.190746 | H    | 4.235159  | 0.482229  | -1.449742 |
| C    | -0.933692 | 2.288926  | -0.503021 | N    | -2.022845 | -0.984324 | 1.380675  |
| C    | 0.075554  | 1.322430  | -0.501930 | N    | -1.337385 | -2.163268 | -1.247479 |
| C    | 1.302318  | 1.833441  | -0.123703 | C    | -2.101980 | -2.401933 | -2.476973 |
| C    | 1.564223  | 3.168190  | 0.208288  | H    | -3.157072 | -2.159155 | -2.313863 |
| C    | 0.507360  | 4.073495  | 0.165991  | H    | -1.719293 | -1.753929 | -3.271339 |
| H    | -1.596447 | 4.354393  | -0.215881 | H    | -2.033695 | -3.449184 | -2.820859 |
| H    | 2.566925  | 3.482631  | 0.484995  | C    | 0.093248  | -2.424078 | -1.484318 |
| H    | 0.675509  | 5.119144  | 0.411347  | H    | 0.449559  | -1.768627 | -2.283258 |
| Li   | -1.309519 | -0.176873 | -0.452430 | H    | 0.672714  | -2.192981 | -0.588681 |
| O    | 2.479537  | 1.021872  | -0.138969 | H    | 0.269070  | -3.475657 | -1.774169 |
| O    | -2.197900 | 1.732810  | -0.843278 | C    | -1.853746 | -2.970161 | -0.123087 |
| C    | -3.336600 | 2.571930  | -0.814675 | H    | -2.941060 | -3.039229 | -0.232601 |
| H    | -3.253392 | 3.385444  | -1.547697 | H    | -1.470475 | -4.004889 | -0.164231 |
| H    | -4.195133 | 1.946856  | -1.073895 | C    | -1.506320 | -2.358174 | 1.239436  |
| H    | -3.493671 | 3.010215  | 0.181114  | H    | -1.891651 | -3.020327 | 2.037011  |
| C    | 2.508777  | -0.207675 | 0.409847  | H    | -0.420243 | -2.305214 | 1.359770  |
| O    | 1.678368  | -0.679740 | 1.180095  | C    | -3.477505 | -0.949968 | 1.555944  |
| N    | 3.632082  | -0.895513 | 0.006507  | H    | -3.799818 | -1.474702 | 2.473429  |
| C    | 3.980686  | -2.131517 | 0.683902  | H    | -3.805573 | 0.091562  | 1.620991  |
| H    | 4.189568  | -2.922256 | -0.048476 | H    | -3.985732 | -1.408088 | 0.702323  |
| H    | 4.877004  | -2.001186 | 1.308632  | C    | -1.359428 | -0.287033 | 2.496932  |
| H    | 3.147587  | -2.432398 | 1.317124  | H    | -0.284423 | -0.251806 | 2.310460  |
| C    | 4.657427  | -0.321677 | -0.850947 | H    | -1.734609 | 0.739359  | 2.548595  |
| H    | 5.500513  | 0.076252  | -0.265882 | H    | -1.558625 | -0.782131 | 3.464090  |
| H    | 5.045049  | -1.101085 | -1.518369 |      |           |           |           |

**Table 5 (Continued).**

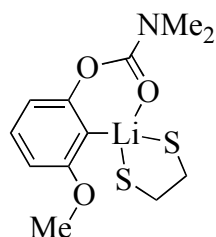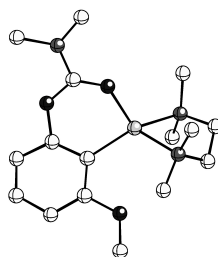

**A59**  
 $G^\circ = -1023.673569$   
 See pg S85  
 S = NMe<sub>2</sub>

| Atom | X         | Y         | Z         | Atom | X         | Y         | Z         |
|------|-----------|-----------|-----------|------|-----------|-----------|-----------|
| C    | 0.589027  | 3.737077  | 0.057724  | H    | -3.022953 | -2.883742 | -0.240797 |
| C    | 0.928390  | 2.379201  | 0.068788  | N    | 1.753145  | -1.513367 | -1.461069 |
| C    | 0.000854  | 1.322168  | 0.061211  | N    | 1.432006  | -1.796633 | 1.477513  |
| C    | -1.306556 | 1.764447  | 0.026001  | C    | 2.877697  | -1.810627 | -0.558058 |
| C    | -1.741506 | 3.098460  | 0.007958  | H    | 3.660660  | -2.404546 | -1.066476 |
| C    | -0.767832 | 4.086936  | 0.026616  | H    | 3.330795  | -0.853940 | -0.281362 |
| H    | 1.335362  | 4.525038  | 0.070101  | C    | 2.433619  | -2.552316 | 0.707347  |
| H    | -2.799968 | 3.342344  | -0.018355 | H    | 3.324727  | -2.784625 | 1.318928  |
| H    | -1.054499 | 5.135657  | 0.016375  | H    | 1.989076  | -3.514693 | 0.432690  |
| Li   | 0.324471  | -0.705705 | -0.063856 | C    | 1.264096  | -2.706478 | -2.157330 |
| O    | -2.453453 | 0.881278  | 0.030503  | H    | 0.930540  | -3.462855 | -1.441735 |
| O    | 2.270182  | 1.969411  | 0.084264  | H    | 0.404203  | -2.433529 | -2.775762 |
| C    | 3.272398  | 2.965631  | 0.122270  | H    | 2.036413  | -3.157013 | -2.807697 |
| H    | 3.194388  | 3.593677  | 1.021416  | C    | 2.120040  | -0.471056 | -2.429832 |
| H    | 4.230800  | 2.439038  | 0.139653  | H    | 1.253578  | -0.244334 | -3.058221 |
| H    | 3.240658  | 3.617805  | -0.762519 | H    | 2.396816  | 0.438105  | -1.891267 |
| C    | -2.466640 | -0.441347 | -0.102571 | H    | 2.953458  | -0.786103 | -3.084213 |
| O    | -1.491973 | -1.189741 | -0.269817 | C    | 0.634320  | -2.680815 | 2.331622  |
| N    | -3.742190 | -0.941554 | -0.024105 | H    | -0.133460 | -2.091882 | 2.842150  |
| C    | -4.928567 | -0.102206 | 0.054246  | H    | 0.132283  | -3.435722 | 1.718546  |
| H    | -5.649842 | -0.562044 | 0.740133  | H    | 1.242584  | -3.195884 | 3.097329  |
| H    | -4.664206 | 0.884906  | 0.425261  | C    | 2.048183  | -0.730787 | 2.281982  |
| H    | -5.410474 | 0.003329  | -0.928970 | H    | 2.541697  | -0.001508 | 1.636983  |
| C    | -3.972666 | -2.353754 | -0.276774 | H    | 1.264014  | -0.194650 | 2.822855  |
| H    | -4.647878 | -2.761774 | 0.485264  | H    | 2.773481  | -1.136789 | 3.011207  |
| H    | -4.433565 | -2.511049 | -1.263128 |      |           |           |           |

Table 5 (Continued).

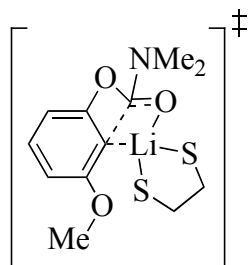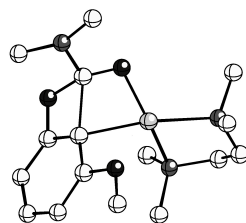

**A60**  
 $G^\circ = -1023.638034$   
 See pg S85  
 $S = NMe_2$

| Atom | X         | Y         | Z         | Atom | X         | Y         | Z         |
|------|-----------|-----------|-----------|------|-----------|-----------|-----------|
| C    | -1.795704 | -2.434651 | 0.982727  | H    | -0.629775 | 3.712958  | 0.099293  |
| C    | -1.259963 | -1.140502 | 1.169457  | N    | 2.613838  | 0.919947  | 0.772460  |
| C    | -1.313701 | -0.223167 | 0.123109  | N    | 1.941098  | -1.035908 | -1.331206 |
| C    | -1.927662 | -0.610655 | -1.061122 | C    | 3.550991  | -0.138172 | 0.349012  |
| C    | -2.469520 | -1.869800 | -1.309724 | H    | 4.601805  | 0.180814  | 0.470985  |
| C    | -2.384610 | -2.773384 | -0.242204 | H    | 3.404510  | -0.994442 | 1.015814  |
| H    | -1.761937 | -3.178604 | 1.771560  | C    | 3.320925  | -0.572745 | -1.103246 |
| H    | -2.949294 | -2.130064 | -2.247898 | H    | 4.061671  | -1.348052 | -1.369896 |
| H    | -2.794639 | -3.773959 | -0.360527 | H    | 3.500410  | 0.274053  | -1.773439 |
| Li   | 0.811194  | 0.413528  | -0.257040 | C    | 2.983326  | 2.232721  | 0.219729  |
| O    | -1.911692 | 0.493654  | -1.859942 | H    | 2.991809  | 2.200176  | -0.871973 |
| O    | -0.637253 | -0.738123 | 2.335876  | H    | 2.233580  | 2.970361  | 0.515078  |
| C    | -0.697468 | -1.605477 | 3.455688  | H    | 3.975529  | 2.562139  | 0.575683  |
| H    | -0.157187 | -2.545868 | 3.277769  | C    | 2.528890  | 0.996947  | 2.236644  |
| H    | -0.220823 | -1.070305 | 4.280191  | H    | 1.806324  | 1.769099  | 2.515383  |
| H    | -1.734711 | -1.839386 | 3.729041  | H    | 2.173875  | 0.043276  | 2.636436  |
| C    | -1.227532 | 1.396359  | -0.853068 | H    | 3.500715  | 1.242601  | 2.699878  |
| O    | -0.044943 | 1.759908  | -1.136280 | C    | 1.576472  | -0.966337 | -2.754703 |
| N    | -2.143724 | 2.370749  | -0.410987 | H    | 0.537612  | -1.284546 | -2.871706 |
| C    | -3.488082 | 1.950716  | -0.048914 | H    | 1.650049  | 0.067071  | -3.103371 |
| H    | -4.117016 | 2.841380  | 0.055367  | H    | 2.219288  | -1.610382 | -3.379996 |
| H    | -3.904096 | 1.325186  | -0.838385 | C    | 1.722645  | -2.396915 | -0.821943 |
| H    | -3.514547 | 1.390889  | 0.901777  | H    | 1.962362  | -2.451224 | 0.243762  |
| C    | -1.575432 | 3.350912  | 0.501533  | H    | 0.668782  | -2.661129 | -0.940197 |
| H    | -2.269718 | 4.192327  | 0.598714  | H    | 2.342407  | -3.139269 | -1.355843 |
| H    | -1.399402 | 2.932205  | 1.510650  |      |           |           |           |

**Table 5 (Continued).**

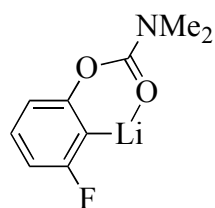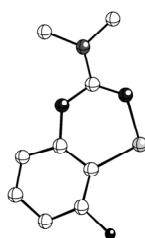

**A61**  
 $G^\circ = -660.850820$   
 See pg S86

| Atom | X         | Y         | Z         | Atom | X         | Y         | Z         |
|------|-----------|-----------|-----------|------|-----------|-----------|-----------|
| C    | -3.442433 | 0.624823  | -0.000564 | O    | 1.433475  | -1.619597 | 0.018663  |
| C    | -2.758451 | -0.586645 | -0.008080 | N    | 2.916932  | 0.100499  | -0.044348 |
| C    | -1.378755 | -0.752051 | -0.004600 | C    | 3.237922  | 1.521603  | -0.023294 |
| C    | -0.702682 | 0.459397  | 0.007366  | H    | 3.989098  | 1.734037  | -0.793058 |
| C    | -1.292606 | 1.728782  | 0.016361  | H    | 2.346797  | 2.111039  | -0.221917 |
| C    | -2.683657 | 1.799092  | 0.012191  | H    | 3.652049  | 1.812872  | 0.951629  |
| H    | -4.528103 | 0.646860  | -0.004126 | C    | 4.050214  | -0.810615 | 0.020422  |
| H    | -0.680955 | 2.626121  | 0.026676  | H    | 4.731391  | -0.618370 | -0.817370 |
| H    | -3.177430 | 2.767031  | 0.018620  | H    | 4.605757  | -0.668041 | 0.957095  |
| Li   | -0.220170 | -2.346236 | 0.009198  | H    | 3.692357  | -1.836514 | -0.032247 |
| O    | 0.735744  | 0.577174  | 0.013122  | F    | -3.533469 | -1.718609 | -0.018926 |
| C    | 1.646866  | -0.389881 | -0.000869 |      |           |           |           |



**Table 5 (Continued).**

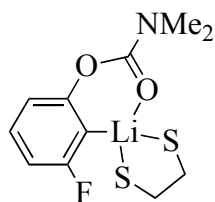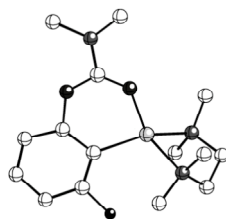

**A62**  
 $G^\circ = -1008.432441$   
 See pg S86  
 S = NMe<sub>2</sub>

| Atom | X         | Y         | Z         | Atom | X         | Y         | Z         |
|------|-----------|-----------|-----------|------|-----------|-----------|-----------|
| C    | 0.519181  | 3.855405  | -0.118039 | C    | -3.420636 | -0.425914 | 0.554664  |
| C    | -0.183882 | 2.655787  | -0.119625 | H    | -4.372594 | -0.653325 | 1.069793  |
| C    | 0.337478  | 1.372632  | -0.101891 | H    | -3.466002 | 0.623170  | 0.247933  |
| C    | 1.723082  | 1.389596  | -0.062655 | C    | -3.299525 | -1.317335 | -0.685276 |
| C    | 2.536938  | 2.529525  | -0.055103 | H    | -4.212434 | -1.205406 | -1.298227 |
| C    | 1.915319  | 3.776418  | -0.086335 | H    | -3.258146 | -2.368693 | -0.381306 |
| H    | 0.000400  | 4.809635  | -0.138527 | C    | -2.288964 | -1.828817 | 2.203009  |
| H    | 3.619364  | 2.439978  | -0.025345 | H    | -2.276884 | -2.679461 | 1.515936  |
| H    | 2.514223  | 4.683282  | -0.083689 | H    | -1.393381 | -1.893856 | 2.827863  |
| Li   | -0.639769 | -0.425417 | 0.057792  | H    | -3.178103 | -1.918459 | 2.853520  |
| O    | 2.529706  | 0.195882  | -0.045310 | C    | -2.207582 | 0.570894  | 2.397632  |
| C    | 2.110949  | -1.060415 | 0.107742  | H    | -1.320243 | 0.469820  | 3.029598  |
| O    | 0.944688  | -1.447886 | 0.271726  | H    | -2.118965 | 1.498882  | 1.829996  |
| N    | 3.156764  | -1.944518 | 0.056439  | H    | -3.098215 | 0.618818  | 3.049806  |
| C    | 4.551150  | -1.534848 | -0.031128 | C    | -1.713295 | -2.163945 | -2.314397 |
| H    | 5.086830  | -2.226905 | -0.691219 | H    | -0.779981 | -1.934541 | -2.837239 |
| H    | 4.621647  | -0.529128 | -0.437889 | H    | -1.547509 | -3.050426 | -1.694088 |
| H    | 5.037377  | -1.556175 | 0.955140  | H    | -2.484288 | -2.402285 | -3.069174 |
| C    | 2.919451  | -3.351001 | 0.336263  | C    | -2.245132 | 0.184970  | -2.289965 |
| H    | 3.405339  | -3.970003 | -0.427839 | H    | -2.399126 | 1.061334  | -1.658534 |
| H    | 3.329003  | -3.631883 | 1.317367  | H    | -1.324009 | 0.356548  | -2.852823 |
| H    | 1.848174  | -3.541590 | 0.330107  | H    | -3.085760 | 0.087001  | -3.000935 |
| N    | -2.268828 | -0.563351 | 1.463461  | F    | -1.573624 | 2.780696  | -0.131730 |
| N    | -2.086098 | -1.026135 | -1.468290 |      |           |           |           |

**Table 5 (Continued).**

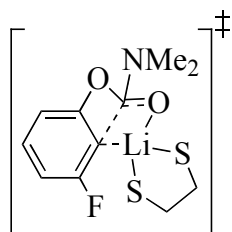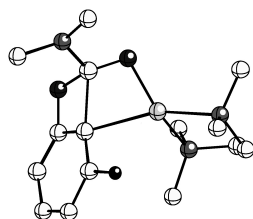

**A63**  
 $G^\circ = -1008.392406$   
 See pg S86  
 S = NMe<sub>2</sub>

| Atom | X         | Y         | Z         | Atom | X         | Y         | Z         |
|------|-----------|-----------|-----------|------|-----------|-----------|-----------|
| C    | 0.519181  | 3.855405  | -0.118039 | C    | -3.420636 | -0.425914 | 0.554664  |
| C    | -0.183882 | 2.655787  | -0.119625 | H    | -4.372594 | -0.653325 | 1.069793  |
| C    | 0.337478  | 1.372632  | -0.101891 | H    | -3.466002 | 0.623170  | 0.247933  |
| C    | 1.723082  | 1.389596  | -0.062655 | C    | -3.299525 | -1.317335 | -0.685276 |
| C    | 2.536938  | 2.529525  | -0.055103 | H    | -4.212434 | -1.205406 | -1.298227 |
| C    | 1.915319  | 3.776418  | -0.086335 | H    | -3.258146 | -2.368693 | -0.381306 |
| H    | 0.000400  | 4.809635  | -0.138527 | C    | -2.288964 | -1.828817 | 2.203009  |
| H    | 3.619364  | 2.439978  | -0.025345 | H    | -2.276884 | -2.679461 | 1.515936  |
| H    | 2.514223  | 4.683282  | -0.083689 | H    | -1.393381 | -1.893856 | 2.827863  |
| Li   | -0.639769 | -0.425417 | 0.057792  | H    | -3.178103 | -1.918459 | 2.853520  |
| O    | 2.529706  | 0.195882  | -0.045310 | C    | -2.207582 | 0.570894  | 2.397632  |
| C    | 2.110949  | -1.060415 | 0.107742  | H    | -1.320243 | 0.469820  | 3.029598  |
| O    | 0.944688  | -1.447886 | 0.271726  | H    | -2.118965 | 1.498882  | 1.829996  |
| N    | 3.156764  | -1.944518 | 0.056439  | H    | -3.098215 | 0.618818  | 3.049806  |
| C    | 4.551150  | -1.534848 | -0.031128 | C    | -1.713295 | -2.163945 | -2.314397 |
| H    | 5.086830  | -2.226905 | -0.691219 | H    | -0.779981 | -1.934541 | -2.837239 |
| H    | 4.621647  | -0.529128 | -0.437889 | H    | -1.547509 | -3.050426 | -1.694088 |
| H    | 5.037377  | -1.556175 | 0.955140  | H    | -2.484288 | -2.402285 | -3.069174 |
| C    | 2.919451  | -3.351001 | 0.336263  | C    | -2.245132 | 0.184970  | -2.289965 |
| H    | 3.405339  | -3.970003 | -0.427839 | H    | -2.399126 | 1.061334  | -1.658534 |
| H    | 3.329003  | -3.631883 | 1.317367  | H    | -1.324009 | 0.356548  | -2.852823 |
| H    | 1.848174  | -3.541590 | 0.330107  | H    | -3.085760 | 0.087001  | -3.000935 |
| N    | -2.268828 | -0.563351 | 1.463461  | F    | -1.573624 | 2.780696  | -0.131730 |
| N    | -2.086098 | -1.026135 | -1.468290 |      |           |           |           |

Table 5 (Continued).

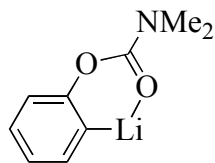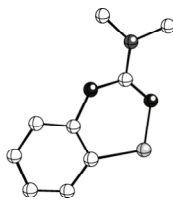

**A64**  
 $G^\circ = -561.595229$   
 See pg S86

| Atom | X         | Y         | Z         | Atom | X         | Y         | Z         |
|------|-----------|-----------|-----------|------|-----------|-----------|-----------|
| C    | 3.790035  | -0.041585 | -0.006320 | O    | -1.356695 | 1.637312  | 0.011185  |
| C    | 3.016530  | 1.121400  | -0.014112 | N    | -2.592207 | -0.269410 | -0.043252 |
| C    | 1.601876  | 1.132757  | -0.008075 | C    | -2.715847 | -1.720422 | -0.013640 |
| C    | 1.056460  | -0.148588 | 0.005755  | H    | -3.428983 | -2.039224 | -0.783036 |
| C    | 1.771190  | -1.350273 | 0.014858  | H    | -1.751448 | -2.182654 | -0.206952 |
| C    | 3.161664  | -1.290054 | 0.008692  | H    | -3.088084 | -2.060434 | 0.962559  |
| H    | 4.876698  | 0.020014  | -0.011502 | C    | -3.838503 | 0.479112  | 0.017974  |
| H    | 1.248318  | -2.303197 | 0.026760  | H    | -4.488113 | 0.191704  | -0.817892 |
| H    | 3.744164  | -2.208010 | 0.015206  | H    | -4.369996 | 0.268119  | 0.955964  |
| Li   | 0.199109  | 2.528045  | 0.003236  | H    | -3.623700 | 1.543905  | -0.040775 |
| O    | -0.366462 | -0.440995 | 0.014470  | H    | 3.547095  | 2.074987  | -0.025197 |
| C    | -1.398833 | 0.388651  | -0.003020 |      |           |           |           |

**Table 5 (Continued).**

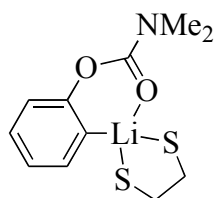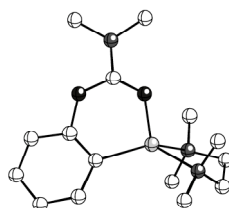

**A65**  
 $G^\circ = -909.173538$   
 See pg S86  
 S = NMe<sub>2</sub>

| Atom | X         | Y         | Z         | Atom | X        | Y         | Z         |
|------|-----------|-----------|-----------|------|----------|-----------|-----------|
| C    | -1.582750 | 3.878130  | 0.105214  | C    | 3.596549 | 0.124750  | -0.602088 |
| C    | -0.516082 | 2.978851  | 0.202327  | H    | 4.504173 | -0.205959 | -1.140064 |
| C    | -0.648392 | 1.569016  | 0.166974  | H    | 3.743096 | 1.184253  | -0.368508 |
| C    | -1.974742 | 1.175708  | 0.024248  | C    | 3.468388 | -0.674841 | 0.700250  |
| C    | -3.089283 | 2.013452  | -0.082744 | H    | 4.404071 | -0.570041 | 1.280045  |
| C    | -2.884154 | 3.390443  | -0.042150 | H    | 3.364407 | -1.739842 | 0.467117  |
| H    | -1.406014 | 4.952261  | 0.143005  | C    | 2.326697 | -1.267885 | -2.148557 |
| H    | -4.087179 | 1.594893  | -0.191279 | H    | 2.343255 | -2.096005 | -1.435691 |
| H    | -3.730132 | 4.069222  | -0.121470 | H    | 1.383617 | -1.327591 | -2.698016 |
| Li   | 0.758317  | 0.087216  | -0.001984 | H    | 3.163708 | -1.396990 | -2.858829 |
| O    | -2.410290 | -0.208533 | 0.008921  | C    | 2.310306 | 1.124607  | -2.404917 |
| C    | -1.662924 | -1.299177 | -0.102659 | H    | 1.383829 | 1.033739  | -2.978788 |
| O    | -0.435988 | -1.355028 | -0.283391 | H    | 2.278223 | 2.076898  | -1.868586 |
| N    | -2.418031 | -2.440343 | 0.008382  | H    | 3.161347 | 1.136352  | -3.109587 |
| C    | -3.870039 | -2.427077 | 0.110662  | C    | 1.899246 | -1.315364 | 2.440641  |
| H    | -4.188195 | -3.238251 | 0.775617  | H    | 0.992551 | -0.998484 | 2.964519  |
| H    | -4.207350 | -1.478013 | 0.520463  | H    | 1.675864 | -2.242453 | 1.904294  |
| H    | -4.345129 | -2.580606 | -0.869555 | H    | 2.683163 | -1.518833 | 3.192427  |
| C    | -1.805424 | -3.732056 | -0.250395 | C    | 2.493268 | 1.001887  | 2.182872  |
| H    | -2.097554 | -4.445706 | 0.529669  | H    | 2.742529 | 1.791553  | 1.469895  |
| H    | -2.125602 | -4.136248 | -1.222173 | H    | 1.562276 | 1.292783  | 2.675322  |
| H    | -0.723016 | -3.620233 | -0.252335 | H    | 3.300418 | 0.938569  | 2.935384  |
| N    | 2.394390  | 0.017535  | -1.445055 | H    | 0.483361 | 3.409159  | 0.316646  |
| N    | 2.291010  | -0.274371 | 1.485834  |      |          |           |           |

Table 5 (Continued).

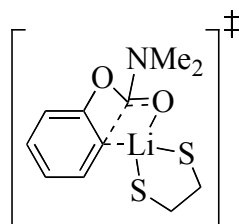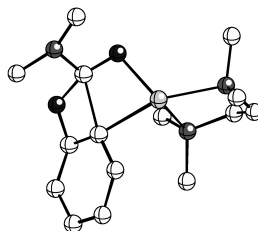

**A66**  
 $G^\circ = -909.141316$   
 See pg S86  
 S = NMe<sub>2</sub>

| Atom | X         | Y         | Z         | Atom | X         | Y         | Z         |
|------|-----------|-----------|-----------|------|-----------|-----------|-----------|
| C    | -1.448578 | -2.277210 | 2.067056  | C    | 3.463366  | 0.083532  | 0.533780  |
| C    | -1.101838 | -0.918720 | 1.905402  | H    | 4.488426  | 0.488194  | 0.607991  |
| C    | -1.298986 | -0.304907 | 0.668333  | H    | 3.375178  | -0.690101 | 1.303467  |
| C    | -1.872493 | -1.060859 | -0.354317 | C    | 3.266980  | -0.545668 | -0.850238 |
| C    | -2.235676 | -2.398180 | -0.246221 | H    | 4.060922  | -1.295181 | -1.019809 |
| C    | -2.002753 | -2.996421 | 1.004949  | H    | 3.390430  | 0.219641  | -1.623628 |
| H    | -1.295046 | -2.767490 | 3.026042  | C    | 2.738338  | 2.378877  | 0.119417  |
| H    | -2.692310 | -2.948087 | -1.064483 | H    | 2.758463  | 2.213663  | -0.960195 |
| H    | -2.272077 | -4.040374 | 1.149646  | H    | 1.940227  | 3.096817  | 0.324188  |
| Li   | 0.696961  | 0.358962  | -0.113771 | H    | 3.703434  | 2.814749  | 0.431605  |
| O    | -2.020237 | -0.219422 | -1.420186 | C    | 2.360136  | 1.370839  | 2.272980  |
| C    | -1.451288 | 1.010326  | -0.766129 | H    | 1.578499  | 2.112709  | 2.462259  |
| O    | -0.328792 | 1.411828  | -1.196318 | H    | 2.089195  | 0.446536  | 2.792170  |
| N    | -2.474042 | 1.946662  | -0.554288 | H    | 3.307050  | 1.748339  | 2.696673  |
| C    | -3.741722 | 1.488710  | -0.007971 | C    | 1.555878  | -1.268217 | -2.424818 |
| H    | -4.481472 | 2.288232  | -0.121106 | H    | 0.532198  | -1.644397 | -2.492326 |
| H    | -4.088148 | 0.616256  | -0.561312 | H    | 1.581075  | -0.289348 | -2.910484 |
| H    | -3.667400 | 1.226976  | 1.060999  | H    | 2.228852  | -1.959410 | -2.961605 |
| C    | -2.024683 | 3.218165  | -0.010030 | C    | 1.795607  | -2.421540 | -0.322060 |
| H    | -2.823951 | 3.958000  | -0.123676 | H    | 2.026368  | -2.318718 | 0.741540  |
| H    | -1.773393 | 3.146846  | 1.065292  | H    | 0.763269  | -2.770803 | -0.403233 |
| H    | -1.144478 | 3.554262  | -0.556823 | H    | 2.469408  | -3.182471 | -0.754438 |
| N    | 2.453734  | 1.120717  | 0.828686  | H    | -0.686577 | -0.374457 | 2.754704  |
| N    | 1.923093  | -1.127218 | -1.007383 |      |           |           |           |

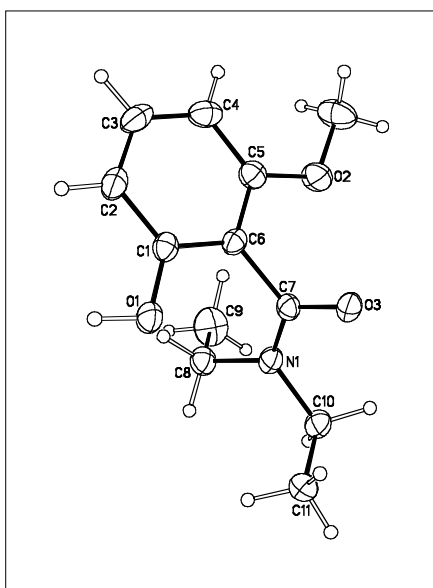

**Figure 79.** The key structural data for the crystal structure of **5b** have been archived in the Cambridge Crystallographic Database (CCDC 684578).

**Figure 79 (Continued).**Table 1. Crystal data and structure refinement for **5b**.

|                                   |                                                  |                 |
|-----------------------------------|--------------------------------------------------|-----------------|
| Identification code               | <b>5b</b>                                        |                 |
| Empirical formula                 | C <sub>12</sub> H <sub>17</sub> N O <sub>3</sub> |                 |
| Formula weight                    | 223.27                                           |                 |
| Temperature                       | 173(2) K                                         |                 |
| Wavelength                        | 0.71073 Å                                        |                 |
| Crystal system                    | Monoclinic                                       |                 |
| Space group                       | P2(1)/n                                          |                 |
| Unit cell dimensions              | a = 7.2430(4) Å                                  | α = 90°.        |
|                                   | b = 17.1827(10) Å                                | β = 95.266(2)°. |
|                                   | c = 9.5958(4) Å                                  | γ = 90°.        |
| Volume                            | 1189.20(11) Å <sup>3</sup>                       |                 |
| Z                                 | 4                                                |                 |
| Density (calculated)              | 1.247 Mg/m <sup>3</sup>                          |                 |
| Absorption coefficient            | 0.089 mm <sup>-1</sup>                           |                 |
| F(000)                            | 480                                              |                 |
| Crystal size                      | 0.60 x 0.35 x 0.20 mm <sup>3</sup>               |                 |
| Theta range for data collection   | 2.37 to 27.88°.                                  |                 |
| Index ranges                      | -9 ≤ h ≤ 9, -22 ≤ k ≤ 22, -12 ≤ l ≤ 12           |                 |
| Reflections collected             | 10590                                            |                 |
| Independent reflections           | 2837 [R(int) = 0.0420]                           |                 |
| Completeness to theta = 27.88°    | 99.9 %                                           |                 |
| Absorption correction             | Semi-empirical from equivalents                  |                 |
| Max. and min. transmission        | 0.9823 and 0.9483                                |                 |
| Refinement method                 | Full-matrix least-squares on F <sup>2</sup>      |                 |
| Data / restraints / parameters    | 2837 / 0 / 213                                   |                 |
| Goodness-of-fit on F <sup>2</sup> | 1.067                                            |                 |
| Final R indices [I > 2σ(I)]       | R1 = 0.0433, wR2 = 0.0943                        |                 |
| R indices (all data)              | R1 = 0.0656, wR2 = 0.1033                        |                 |
| Largest diff. peak and hole       | 0.209 and -0.200 e.Å <sup>-3</sup>               |                 |

**Figure 79 (Continued).**

Table 2. Atomic coordinates ( $\times 10^4$ ) and equivalent isotropic displacement parameters ( $\text{\AA}^2 \times 10^3$ ) for **5b**.  $U(\text{eq})$  is defined as one third of the trace of the orthogonalized  $U^{ij}$  tensor.

|       | x        | y       | z        | U(eq) |
|-------|----------|---------|----------|-------|
| O(1)  | 1295(1)  | 2499(1) | 6177(1)  | 28(1) |
| O(2)  | 3685(1)  | 199(1)  | 8203(1)  | 33(1) |
| O(3)  | 4370(1)  | 1909(1) | 8979(1)  | 28(1) |
| N(1)  | 1301(1)  | 1826(1) | 9267(1)  | 24(1) |
| C(1)  | 1724(1)  | 1738(1) | 5973(1)  | 23(1) |
| C(2)  | 1462(2)  | 1377(1) | 4673(1)  | 28(1) |
| C(3)  | 1955(2)  | 609(1)  | 4563(1)  | 33(1) |
| C(4)  | 2728(2)  | 190(1)  | 5699(1)  | 32(1) |
| C(5)  | 2970(2)  | 550(1)  | 6992(1)  | 26(1) |
| C(6)  | 2450(1)  | 1326(1) | 7143(1)  | 22(1) |
| C(7)  | 2764(2)  | 1715(1) | 8543(1)  | 22(1) |
| C(8)  | -610(2)  | 1642(1) | 8712(1)  | 28(1) |
| C(9)  | -1214(2) | 844(1)  | 9116(2)  | 46(1) |
| C(10) | 1510(2)  | 2228(1) | 10620(1) | 29(1) |
| C(11) | 1472(2)  | 3102(1) | 10445(1) | 34(1) |
| C(12) | 4277(2)  | -590(1) | 8124(2)  | 44(1) |



**Figure 79 (Continued).**Table 3. Bond lengths [Å] and angles [°] for **5b**.

---

|                 |            |
|-----------------|------------|
| O(1)-C(1)       | 1.3617(13) |
| O(2)-C(5)       | 1.3682(13) |
| O(2)-C(12)      | 1.4272(15) |
| O(3)-C(7)       | 1.2449(13) |
| N(1)-C(7)       | 1.3330(14) |
| N(1)-C(10)      | 1.4660(14) |
| N(1)-C(8)       | 1.4712(14) |
| C(1)-C(6)       | 1.3896(14) |
| C(1)-C(2)       | 1.3904(15) |
| C(2)-C(3)       | 1.3745(17) |
| C(3)-C(4)       | 1.3807(17) |
| C(4)-C(5)       | 1.3831(16) |
| C(5)-C(6)       | 1.3952(15) |
| C(6)-C(7)       | 1.4995(14) |
| C(8)-C(9)       | 1.5011(19) |
| C(10)-C(11)     | 1.5109(18) |
| C(5)-O(2)-C(12) | 117.77(9)  |
| C(7)-N(1)-C(10) | 120.45(9)  |
| C(7)-N(1)-C(8)  | 123.12(9)  |
| C(10)-N(1)-C(8) | 116.07(9)  |
| O(1)-C(1)-C(6)  | 116.60(9)  |
| O(1)-C(1)-C(2)  | 122.89(10) |
| C(6)-C(1)-C(2)  | 120.51(10) |
| C(3)-C(2)-C(1)  | 118.82(10) |
| C(2)-C(3)-C(4)  | 121.94(11) |
| C(3)-C(4)-C(5)  | 118.96(11) |
| O(2)-C(5)-C(4)  | 124.86(10) |
| O(2)-C(5)-C(6)  | 114.69(9)  |
| C(4)-C(5)-C(6)  | 120.44(10) |
| C(1)-C(6)-C(5)  | 119.28(9)  |
| C(1)-C(6)-C(7)  | 120.73(10) |

**Figure 79 (Continued).**

|                  |            |
|------------------|------------|
| C(5)-C(6)-C(7)   | 119.92(9)  |
| O(3)-C(7)-N(1)   | 123.32(10) |
| O(3)-C(7)-C(6)   | 118.70(10) |
| N(1)-C(7)-C(6)   | 117.98(9)  |
| N(1)-C(8)-C(9)   | 112.93(10) |
| N(1)-C(10)-C(11) | 111.74(9)  |

---

Symmetry transformations used to generate equivalent atoms:

Table 4. Anisotropic displacement parameters ( $\text{\AA}^2 \times 10^3$ ) for **5b**. The anisotropic displacement factor exponent takes the form:  $-2\pi^2 [ h^2 a^{*2} U^{11} + \dots + 2 h k a^* b^* U^{12} ]$

---

|       | U <sup>11</sup> | U <sup>22</sup> | U <sup>33</sup> | U <sup>23</sup> | U <sup>13</sup> | U <sup>12</sup> |
|-------|-----------------|-----------------|-----------------|-----------------|-----------------|-----------------|
| O(1)  | 34(1)           | 27(1)           | 22(1)           | 2(1)            | -4(1)           | 3(1)            |
| O(2)  | 42(1)           | 25(1)           | 32(1)           | 3(1)            | 1(1)            | 8(1)            |
| O(3)  | 23(1)           | 34(1)           | 24(1)           | -5(1)           | -3(1)           | 0(1)            |
| N(1)  | 25(1)           | 29(1)           | 19(1)           | -1(1)           | 0(1)            | 1(1)            |
| C(1)  | 19(1)           | 27(1)           | 22(1)           | 0(1)            | 1(1)            | -3(1)           |
| C(2)  | 25(1)           | 39(1)           | 21(1)           | -1(1)           | -1(1)           | -3(1)           |
| C(3)  | 31(1)           | 41(1)           | 26(1)           | -13(1)          | 5(1)            | -7(1)           |
| C(4)  | 32(1)           | 28(1)           | 38(1)           | -9(1)           | 7(1)            | -2(1)           |
| C(5)  | 23(1)           | 27(1)           | 28(1)           | 0(1)            | 3(1)            | -1(1)           |
| C(6)  | 20(1)           | 25(1)           | 20(1)           | -2(1)           | 1(1)            | -3(1)           |
| C(7)  | 25(1)           | 20(1)           | 20(1)           | 3(1)            | -2(1)           | 2(1)            |
| C(8)  | 23(1)           | 35(1)           | 26(1)           | 0(1)            | 3(1)            | 1(1)            |
| C(9)  | 37(1)           | 47(1)           | 54(1)           | 7(1)            | 5(1)            | -11(1)          |
| C(10) | 29(1)           | 39(1)           | 19(1)           | -2(1)           | 2(1)            | 4(1)            |
| C(11) | 28(1)           | 38(1)           | 36(1)           | -10(1)          | -2(1)           | 8(1)            |
| C(12) | 55(1)           | 30(1)           | 48(1)           | 8(1)            | 14(1)           | 14(1)           |

---

**Figure 79 (Continued).**Table 5. Hydrogen coordinates ( $\times 10^4$ ) and isotropic displacement parameters ( $\text{\AA}^2 \times 10^3$ ) for **5b**.

|        | x         | y       | z         | U(eq) |
|--------|-----------|---------|-----------|-------|
| H(10B) | 2705(17)  | 2063(7) | 11123(12) | 31(3) |
| H(10A) | 491(17)   | 2070(7) | 11144(12) | 30(3) |
| H(8B)  | -714(18)  | 1687(7) | 7670(13)  | 37(3) |
| H(3)   | 1736(17)  | 356(7)  | 3673(13)  | 37(3) |
| H(12C) | 5260(20)  | -636(8) | 7470(14)  | 49(4) |
| H(11C) | 1422(19)  | 3351(8) | 11358(14) | 45(4) |
| H(11B) | 327(19)   | 3263(7) | 9840(13)  | 38(4) |
| H(8A)  | -1441(17) | 2025(7) | 9083(12)  | 28(3) |
| H(4)   | 3061(18)  | -335(8) | 5610(13)  | 37(3) |
| H(2)   | 880(18)   | 1666(7) | 3871(13)  | 39(4) |
| H(11A) | 2606(19)  | 3287(7) | 10004(13) | 38(4) |
| H(9C)  | -400(20)  | 428(10) | 8702(17)  | 75(5) |
| H(12B) | 4789(19)  | -725(8) | 9083(14)  | 46(4) |
| H(12A) | 3180(20)  | -929(8) | 7846(15)  | 58(4) |
| H(9B)  | -2520(20) | 756(9)  | 8764(15)  | 59(4) |
| H(9A)  | -1120(20) | 806(8)  | 10126(15) | 54(4) |
| H(10)  | 570(20)   | 2674(8) | 5384(15)  | 54(4) |

## REFERENCES

1. Briggs, T. F.; Winemiller, M. D.; Collum, D. B.; Parsons, R. L., Jr.; Davulcu, A. K.; Harris, G. D.; Fortunak, J. D.; Confalone, P. N. *J. Am. Chem. Soc.* **2004**, *126*, 5427.
2. Zhao, P.; Lucht, B. L.; Kenkre, S. L.; Collum, D. B. *J. OrG<sup>o</sup>. Chem.* **2004**, *69*, 242.
3. Free energy was determined at STP and hydrogens omitted for clarity. Gaussian 03, Revision B.04, Frisch, M. J.; Trucks, G. W.; Schlegel, H. B.; Scuseria, G. E.; Robb, M. A.; Cheeseman, J. R.; Montgomery, Jr., J. A.; Vreven, T.; Kudin, K. N.; Burant, J. C.; Millam, J. M.; Iyengar, S. S.; Tomasi, J.; Barone, V.; Mennucci, B.; Cossi, M.; Scalmani, G.; Rega, N.; Petersson, G. A.; Nakatsuji, H.; Hada, M.; Ehara, M.; Toyota, K.; Fukuda, R.; Hasegawa, J.; Ishida, M.; Nakajima, T.; Honda, Y.; Kitao, O.; Nakai, H.; Klene, M.; Li, X.; Knox, J. E.; Hratchian, H. P.; Cross, J. B.; Bakken, V.; Adamo, C.; Jaramillo, J.; Gomperts, R.; Stratmann, R. E.; Yazyev, O.; Austin, A. J.; Cammi, R.; Pomelli, C.; Ochterski, J. W.; Ayala, P. Y.; Morokuma, K.; Voth, G. A.; Salvador, P.; Dannenberg, J. J.; Zakrzewski, V. G.; Dapprich, S.; Daniels, A. D.; Strain, M. C.; Farkas, O.; Malick, D. K.; Rabuck, A. D.; Raghavachari, K.; Foresman, J. B.; Ortiz, J. V.; Cui, Q.; Baboul, A. G.; Clifford, S.; Cioslowski, J.; Stefanov, B. B.; Liu, G.; Liashenko, A.; Piskorz, P.; Komaromi, I.; Martin, R. L.; Fox, D. J.; Keith, T.; Al-Laham, M. A.; Peng, C. Y.; Nanayakkara, A.; Challacombe, M.; Gill, P. M. W.; Johnson, B.; Chen, W.; Wong, M. W.; Gonzalez, C.; and Pople, J. A.; Gaussian, Inc., Wallingford CT, 2004.
4. GaussView, Version 3.09, Dennington II, R.; Keith, T.; Millam, J.; Eppinnett, K.; Hovell, W. L.; Gilliland, R.; Semichem, Inc., Shawnee Mission, KS, 2003.
